# Supplementary material for: Livestock Informatics Toolkit: A Case Study in Visually Characterizing Complex Behavioral Patterns across Multiple Sensor Platforms, Using Novel Unsupervised Machine Learning and Information Theoretic Approaches
Source: MDPI journal article supplement (doi:10.3390/s22010001), 2021-12-21
Supplement: s1 [file s1]

3

2

1

0

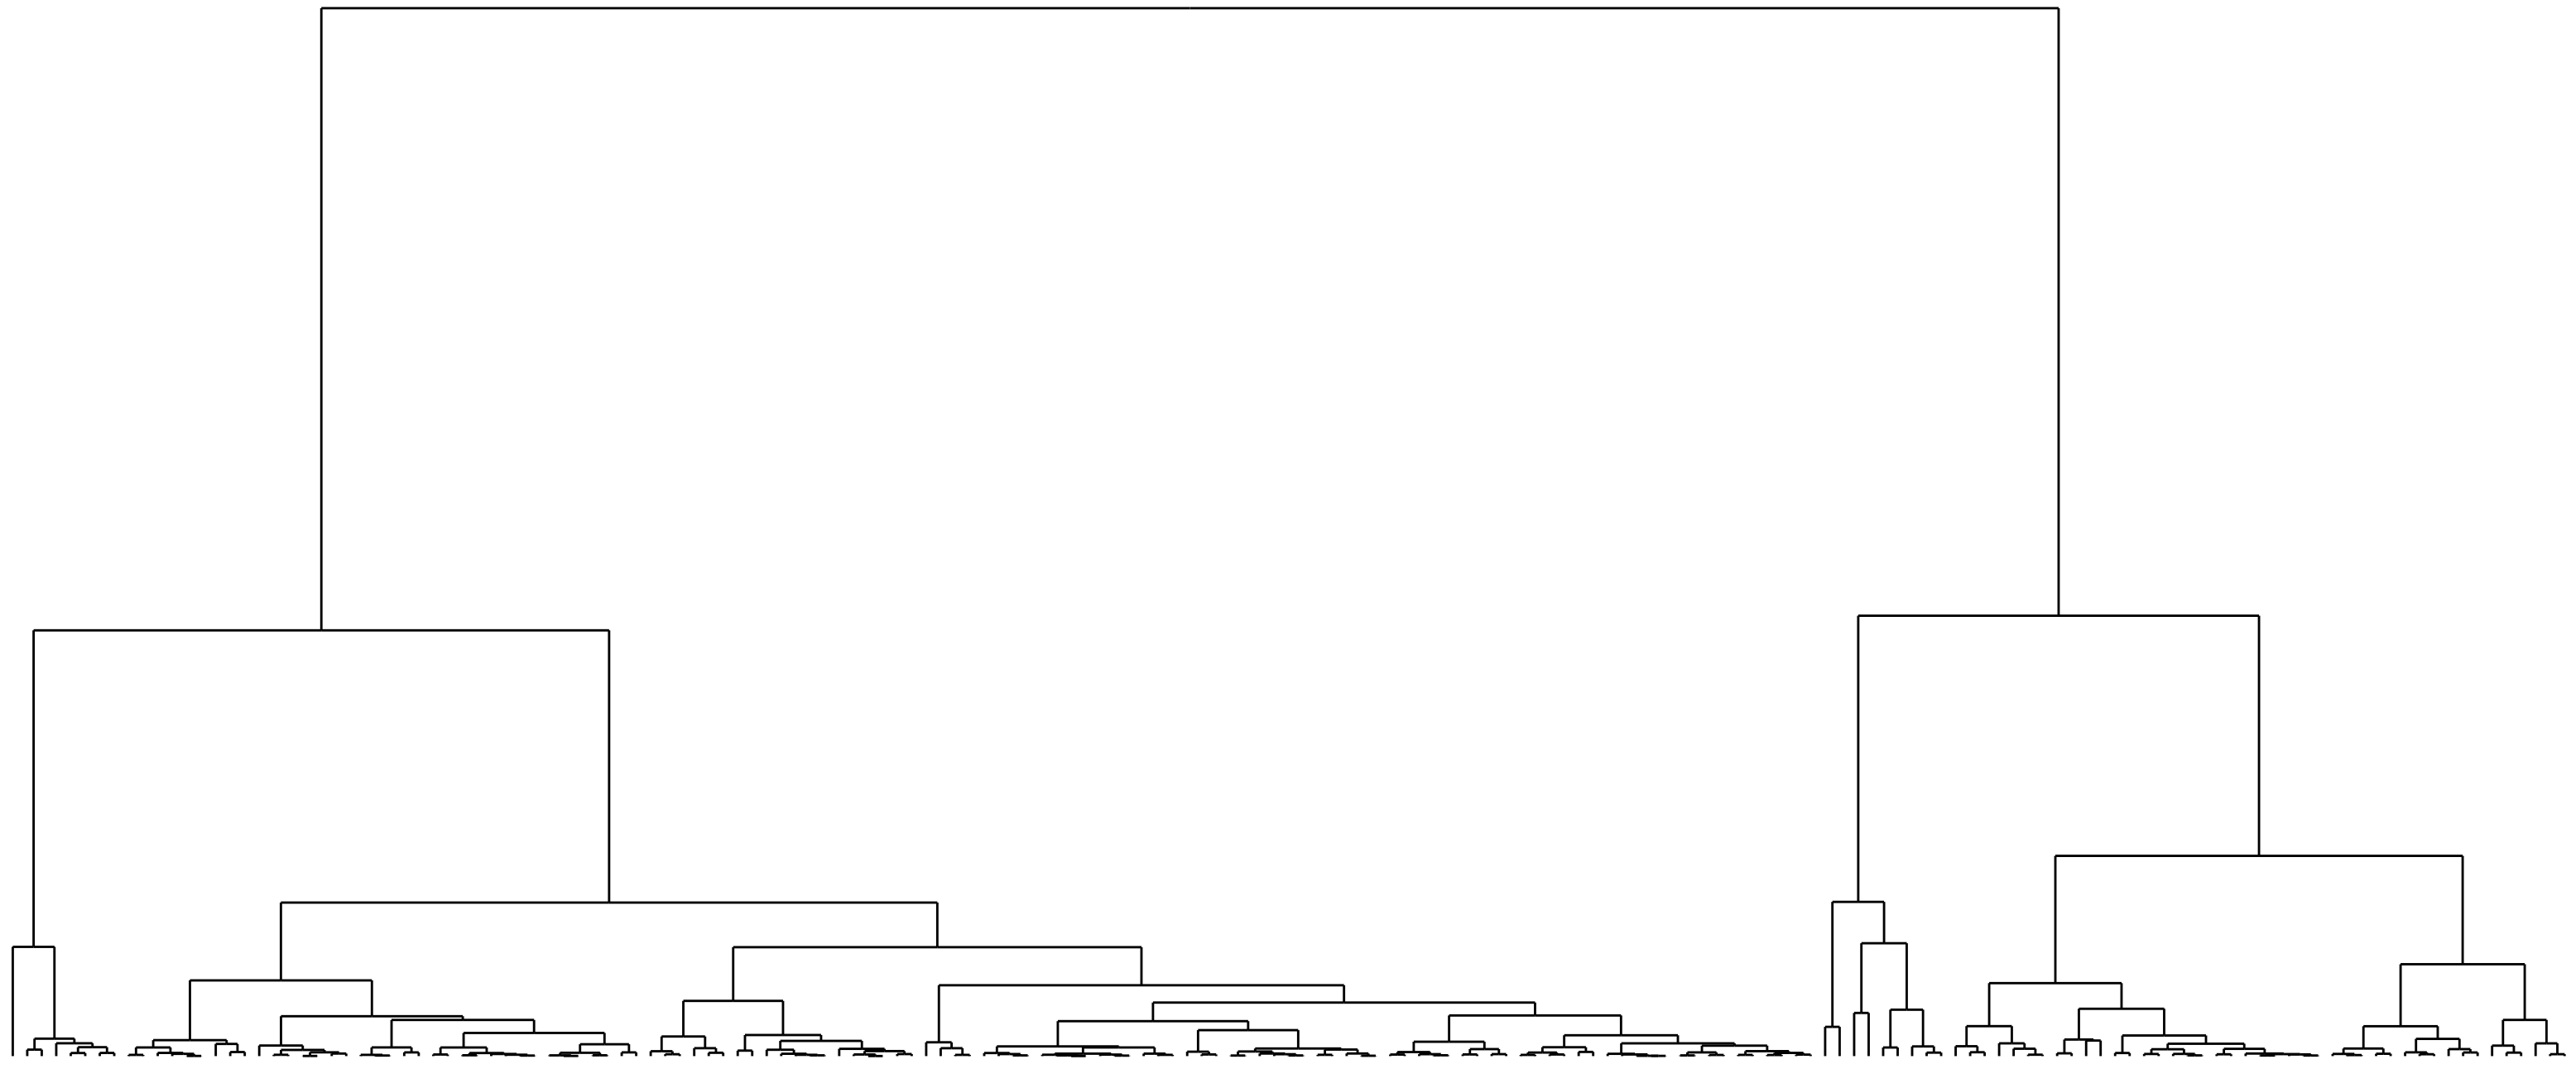

1. The first part of the text describes the structure of the tree, mentioning the root node and the branching process. It states that the root node branches into two nodes at level 2, which then branch into multiple nodes at level 1, and finally into many leaf nodes at level 0. The text also mentions that the tree is a binary tree, meaning each node has at most two children.

2. The second part of the text discusses the complexity of the tree. It states that the number of nodes in the tree grows exponentially with the number of levels. For example, a tree with 4 levels has 16 nodes, while a tree with 5 levels has 32 nodes. The text also mentions that the height of the tree is related to the number of levels, and that the width of the tree is also related to the number of levels.

3. The third part of the text discusses the applications of the tree structure. It mentions that trees are used in many areas of computer science, including data structures, algorithms, and artificial intelligence. It also mentions that trees are used in many other fields, such as biology, chemistry, and social sciences.

4. The fourth part of the text discusses the advantages and disadvantages of the tree structure. It mentions that trees are easy to implement and use, and that they are efficient for many applications. However, it also mentions that trees can be inefficient for some applications, such as those that require a large number of nodes or a large number of levels.

5. The fifth part of the text discusses the future of the tree structure. It mentions that there are many ongoing research projects in the area of trees, and that there are many new applications being developed. It also mentions that there are many challenges that need to be addressed in order to make trees more efficient and more useful.
