# Supplementary figures and images for: Livestock Informatics Toolkit: A Case Study in Visually Characterizing Complex Behavioral Patterns across Multiple Sensor Platforms, Using Novel Unsupervised Machine Learning and Information Theoretic Approaches
Source: MDPI journal article supplement (doi:10.3390/s22010001), 2021-12-21

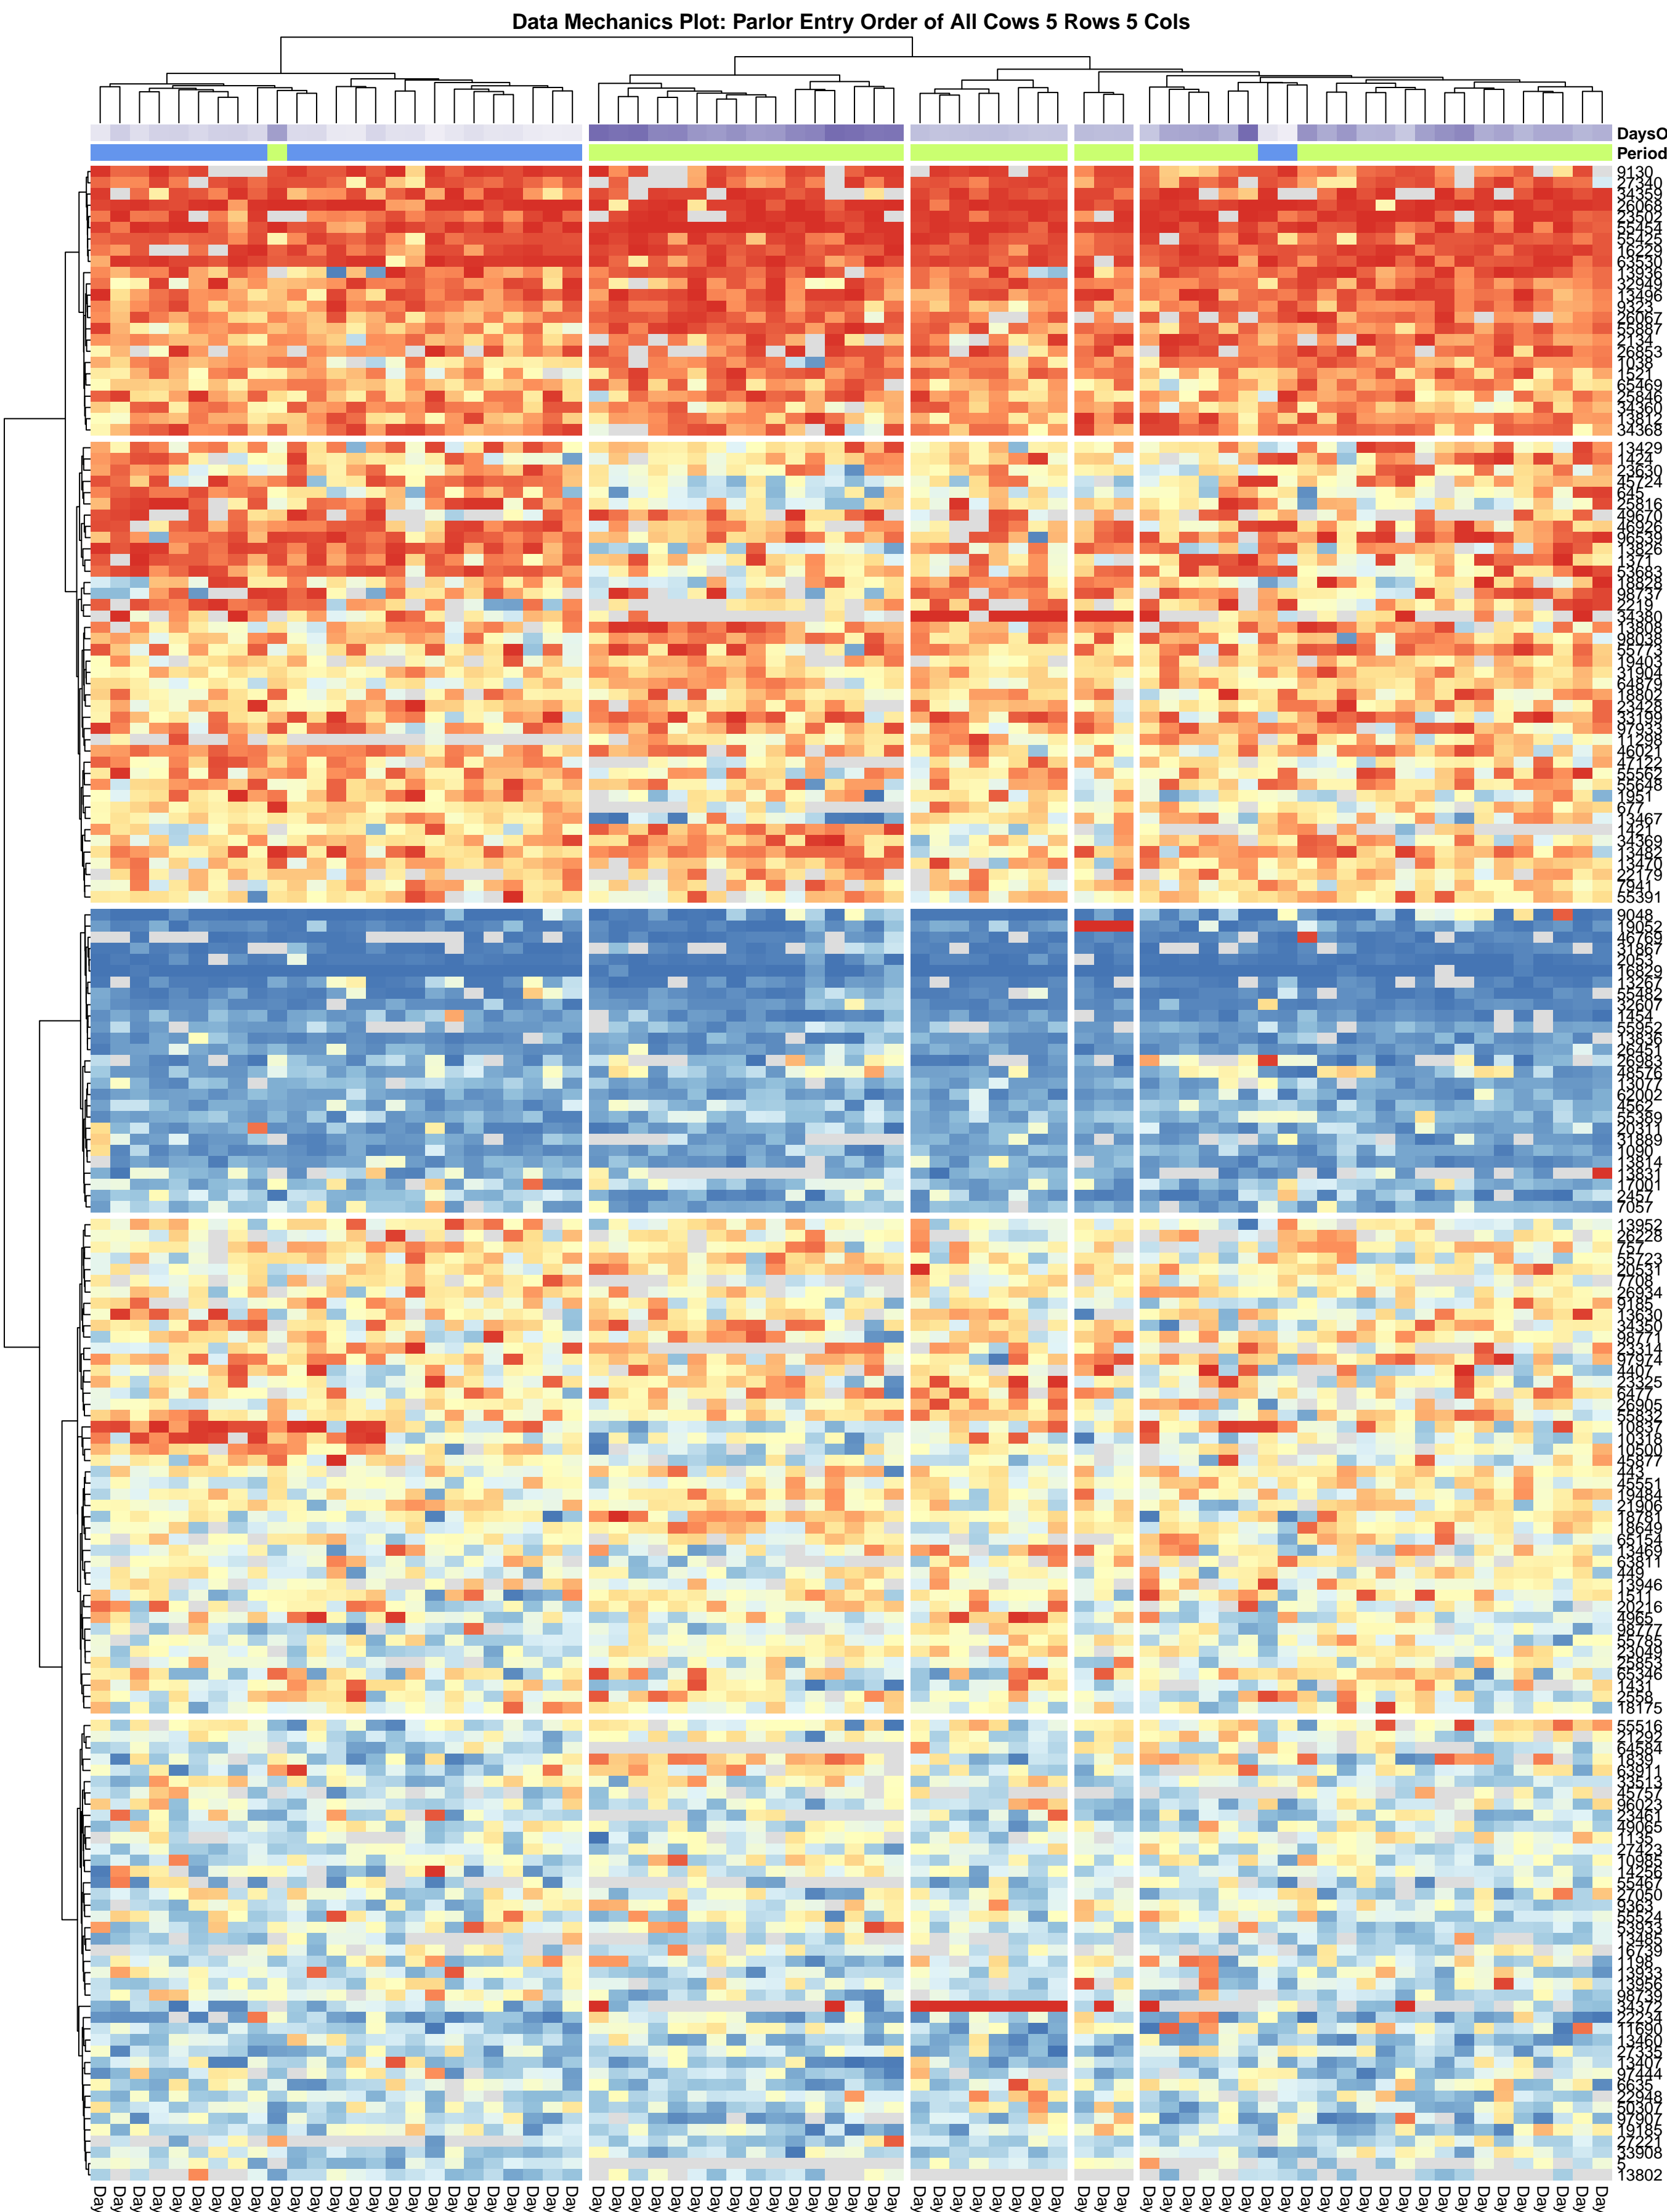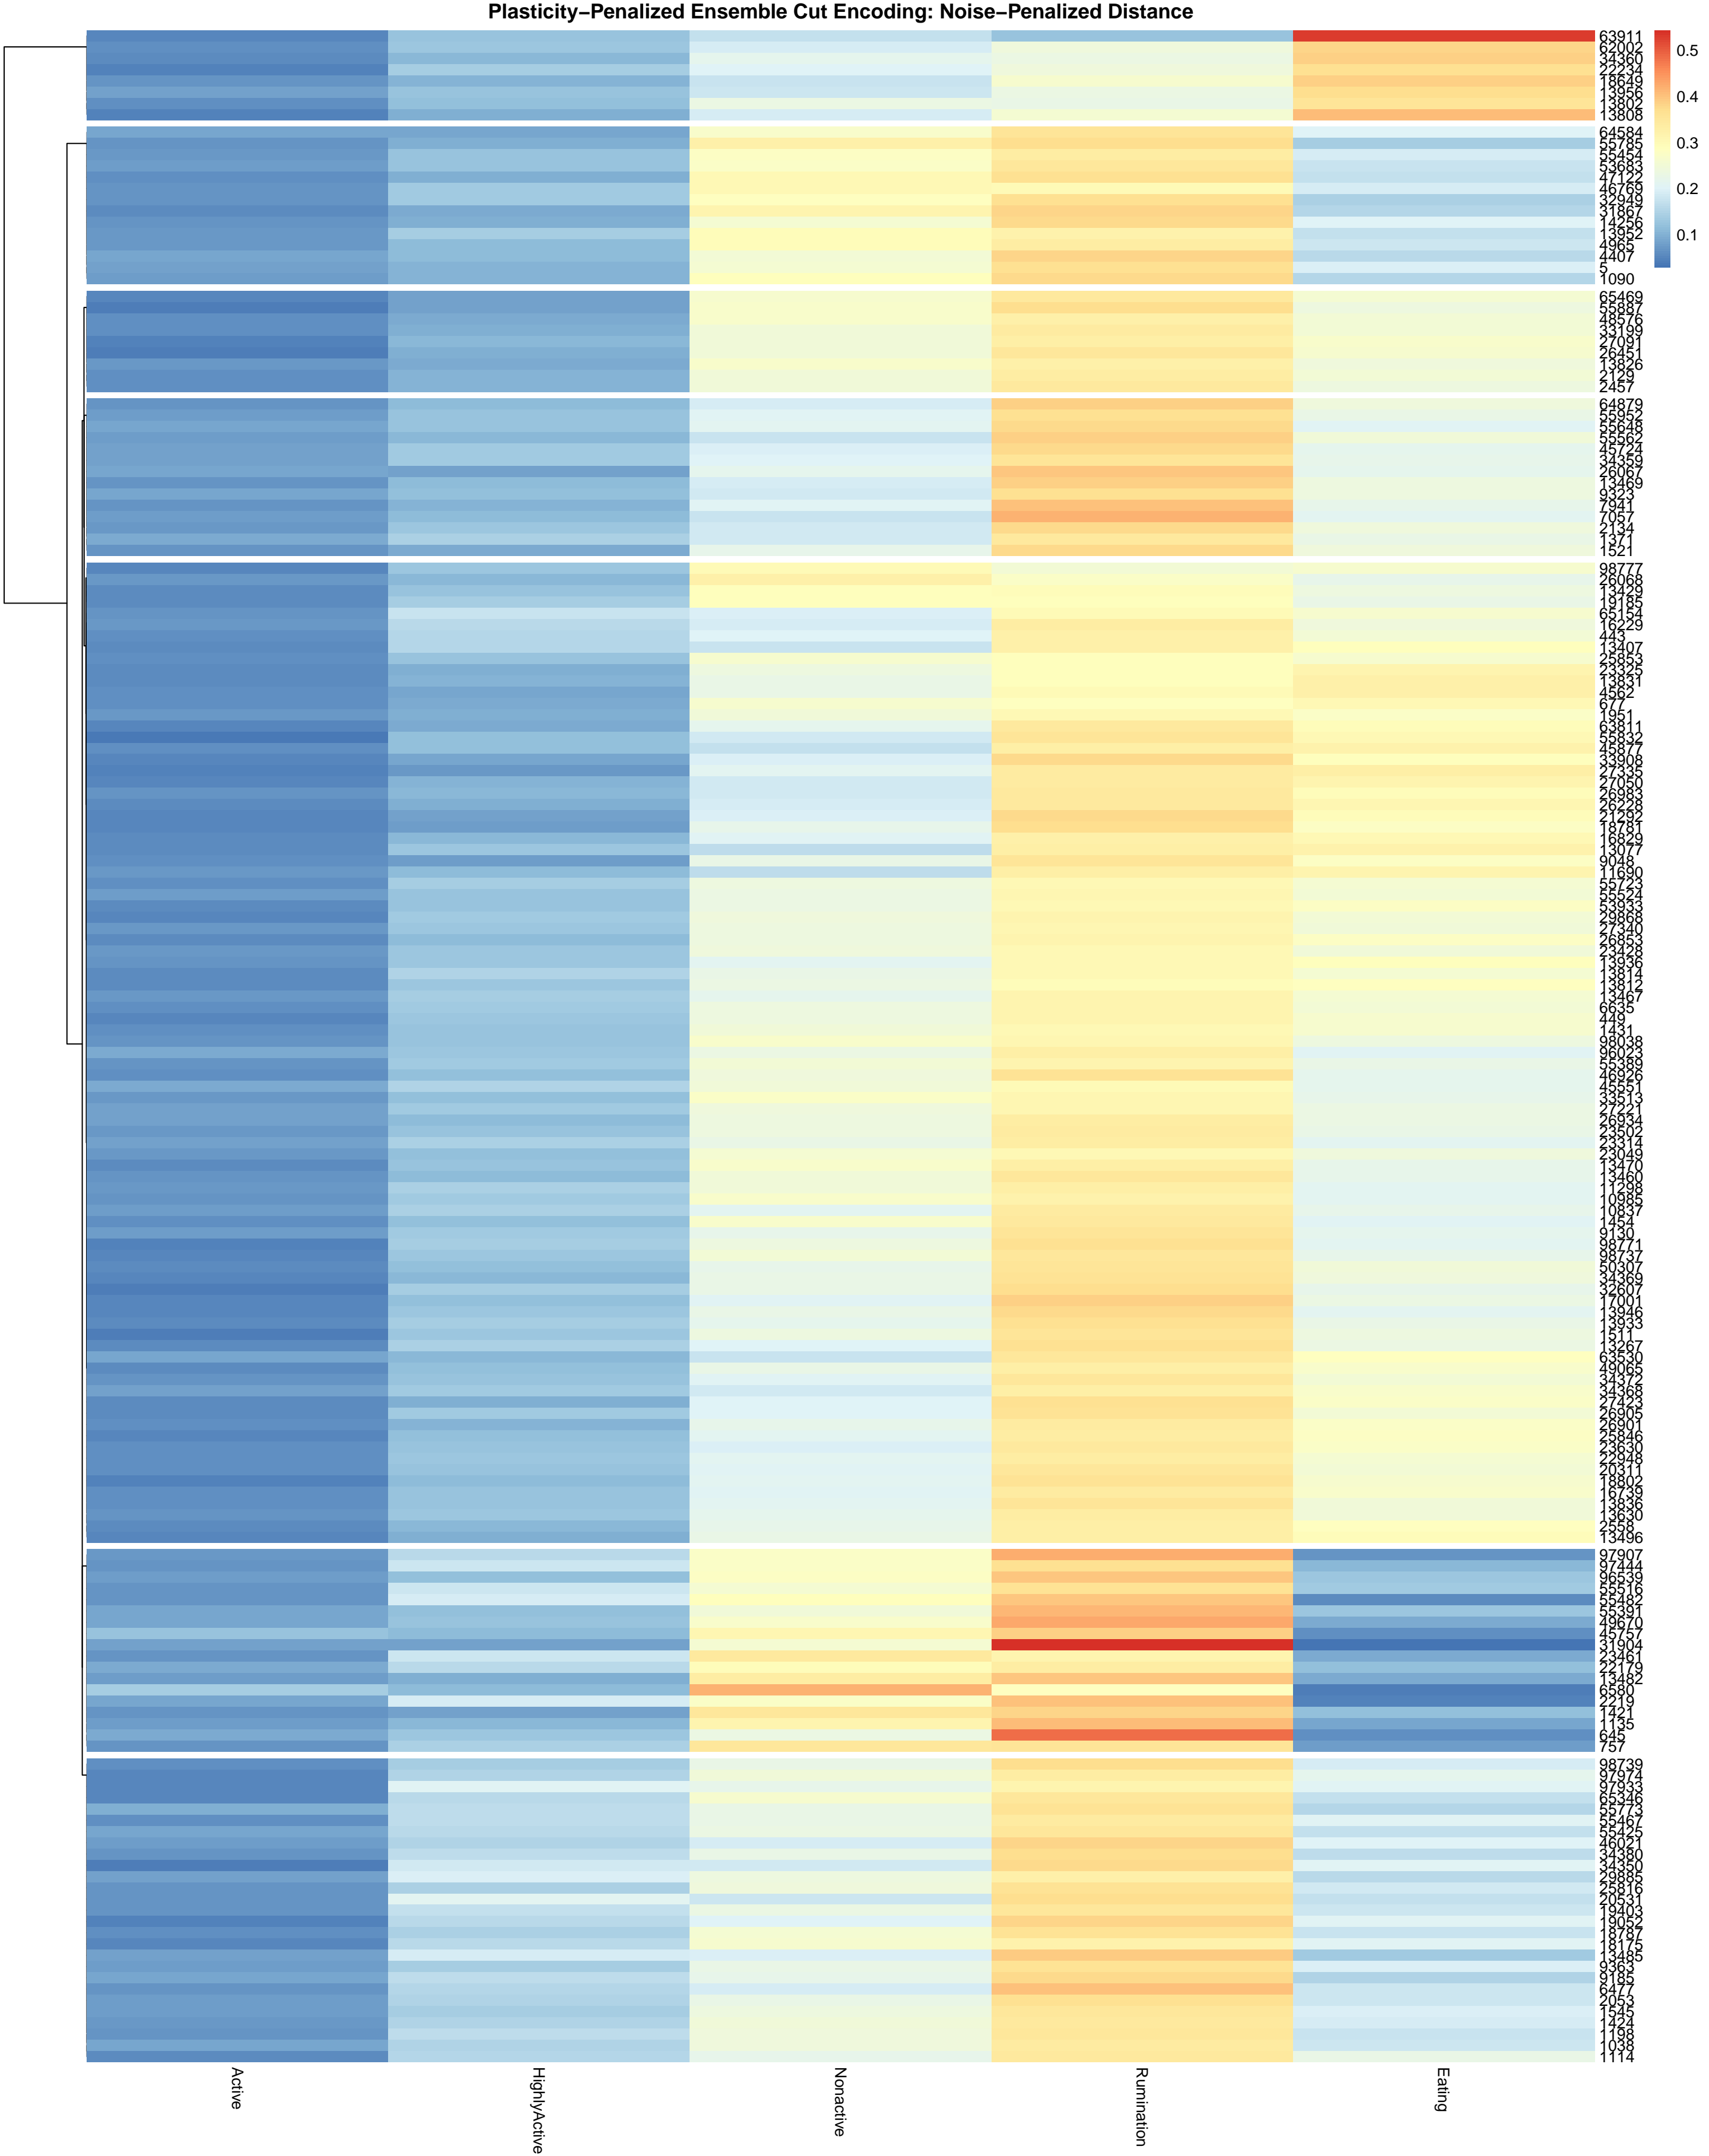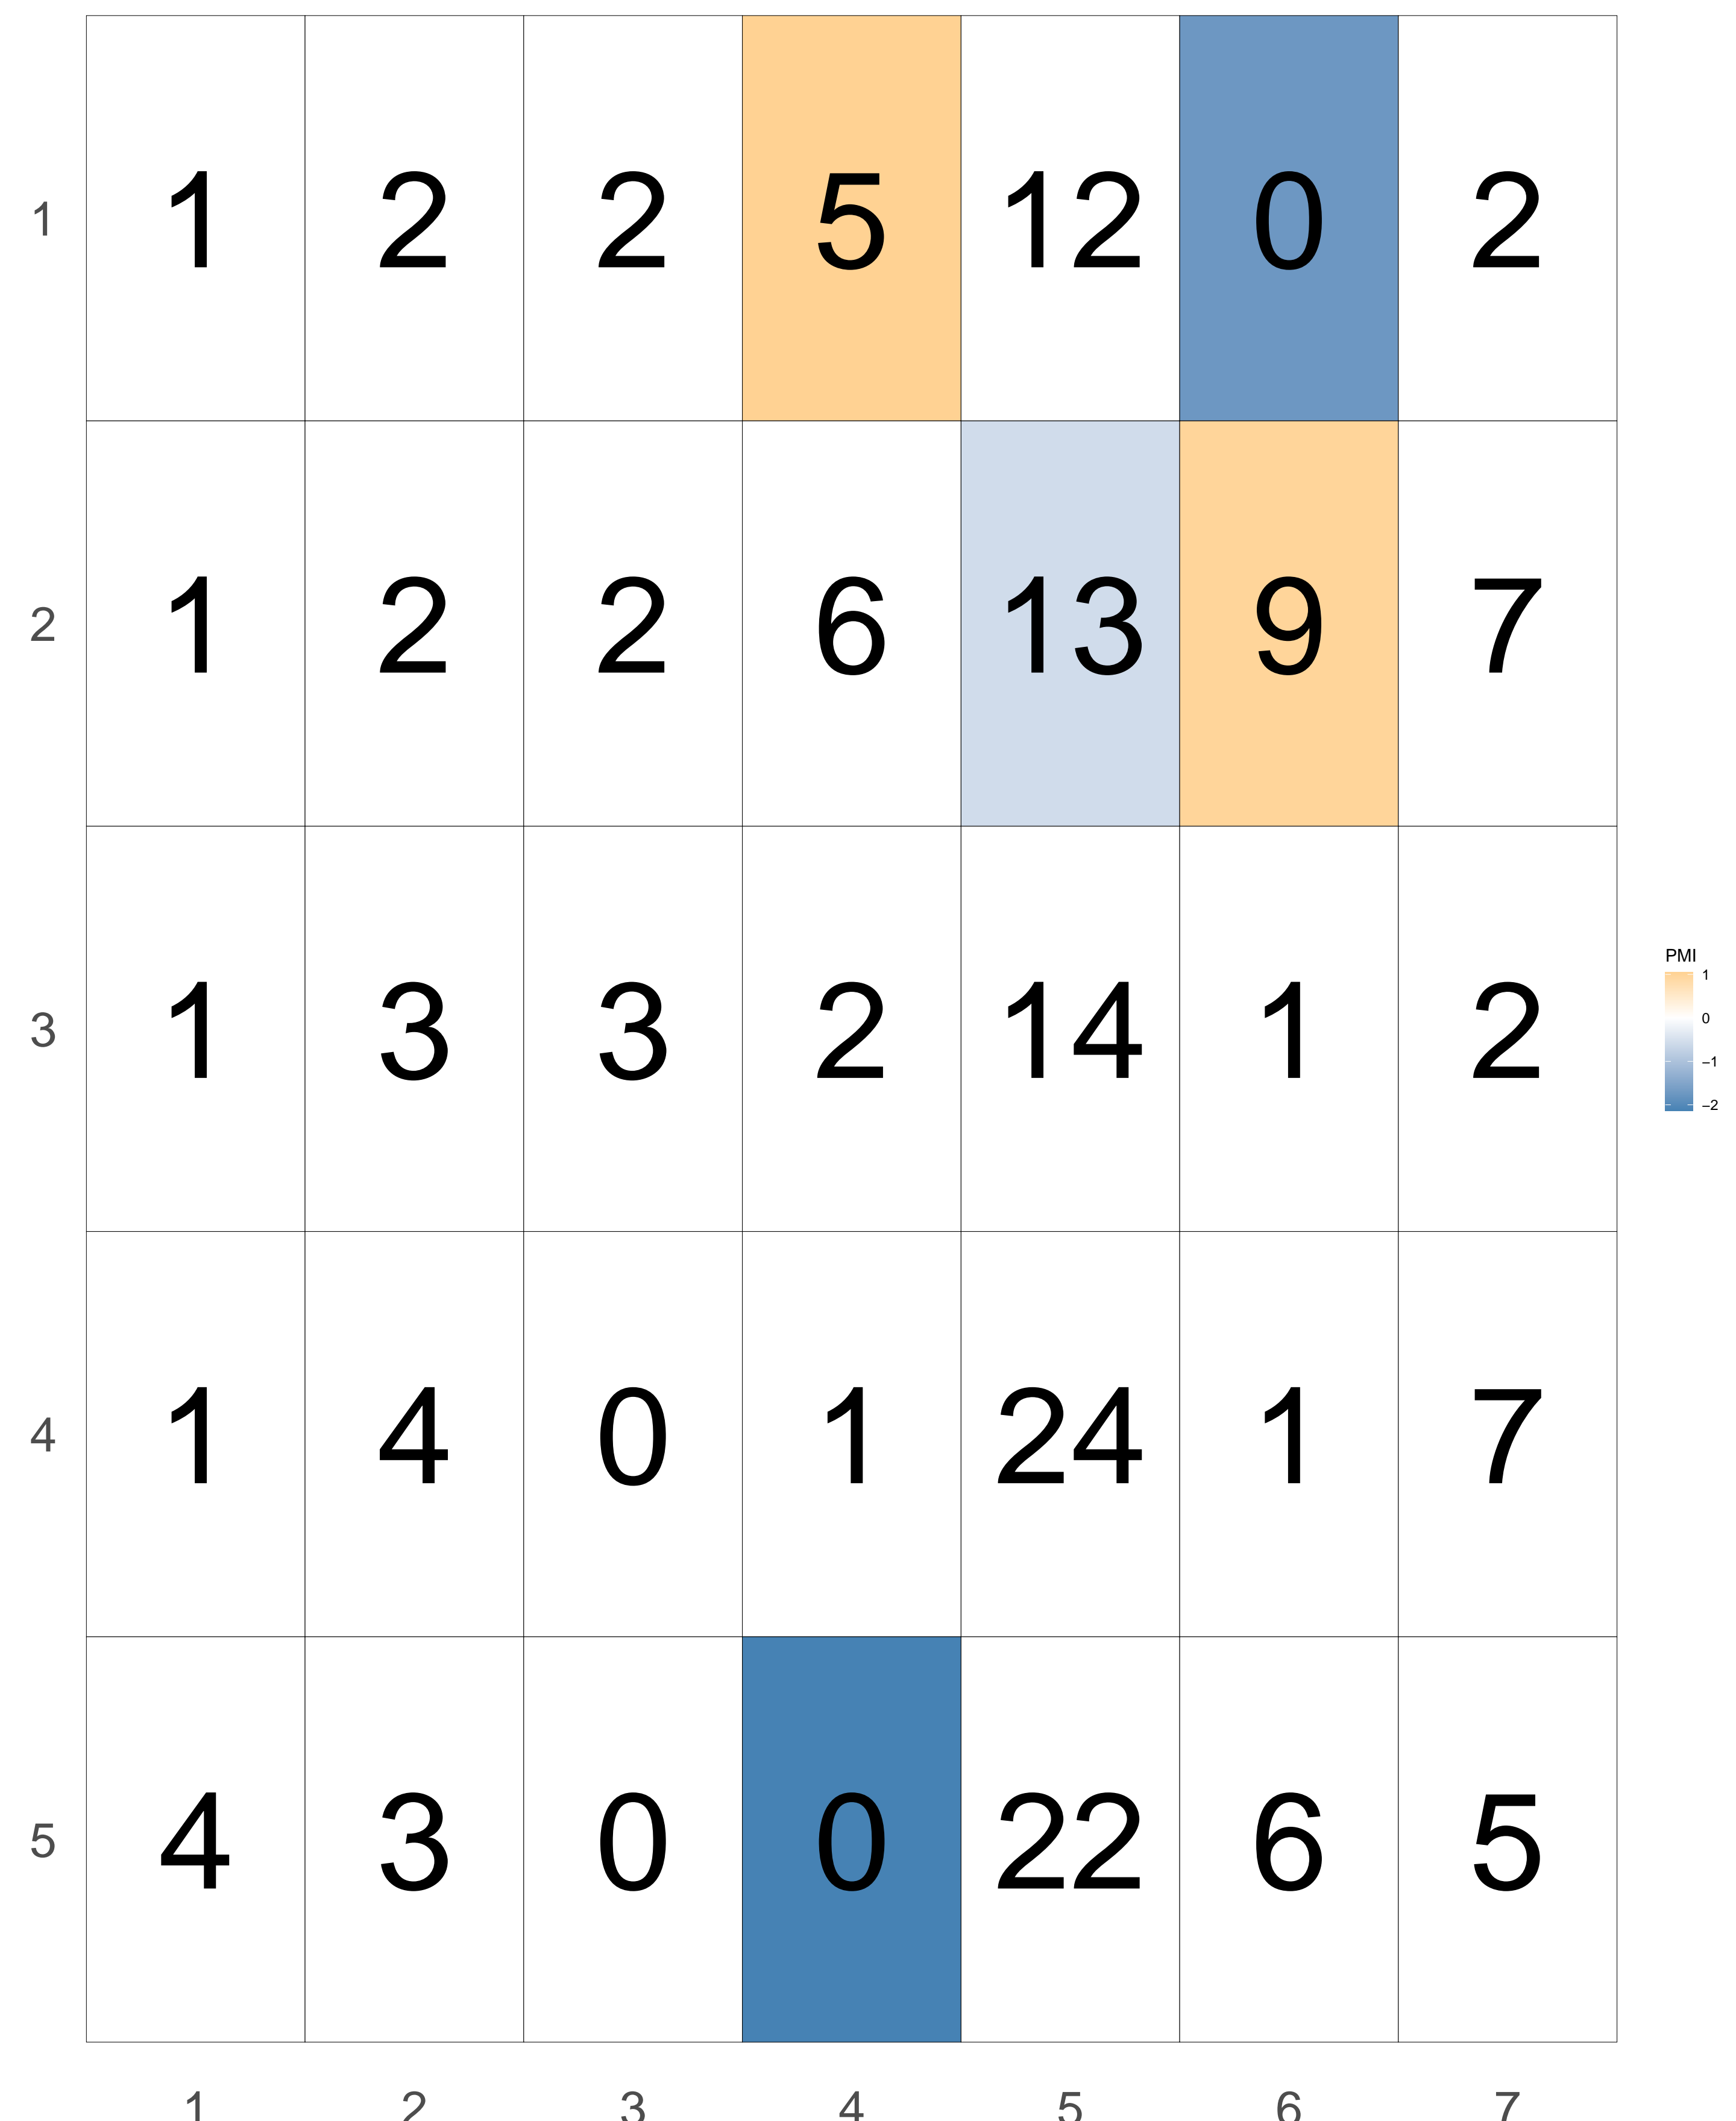

Supplement: s1 [file s1]

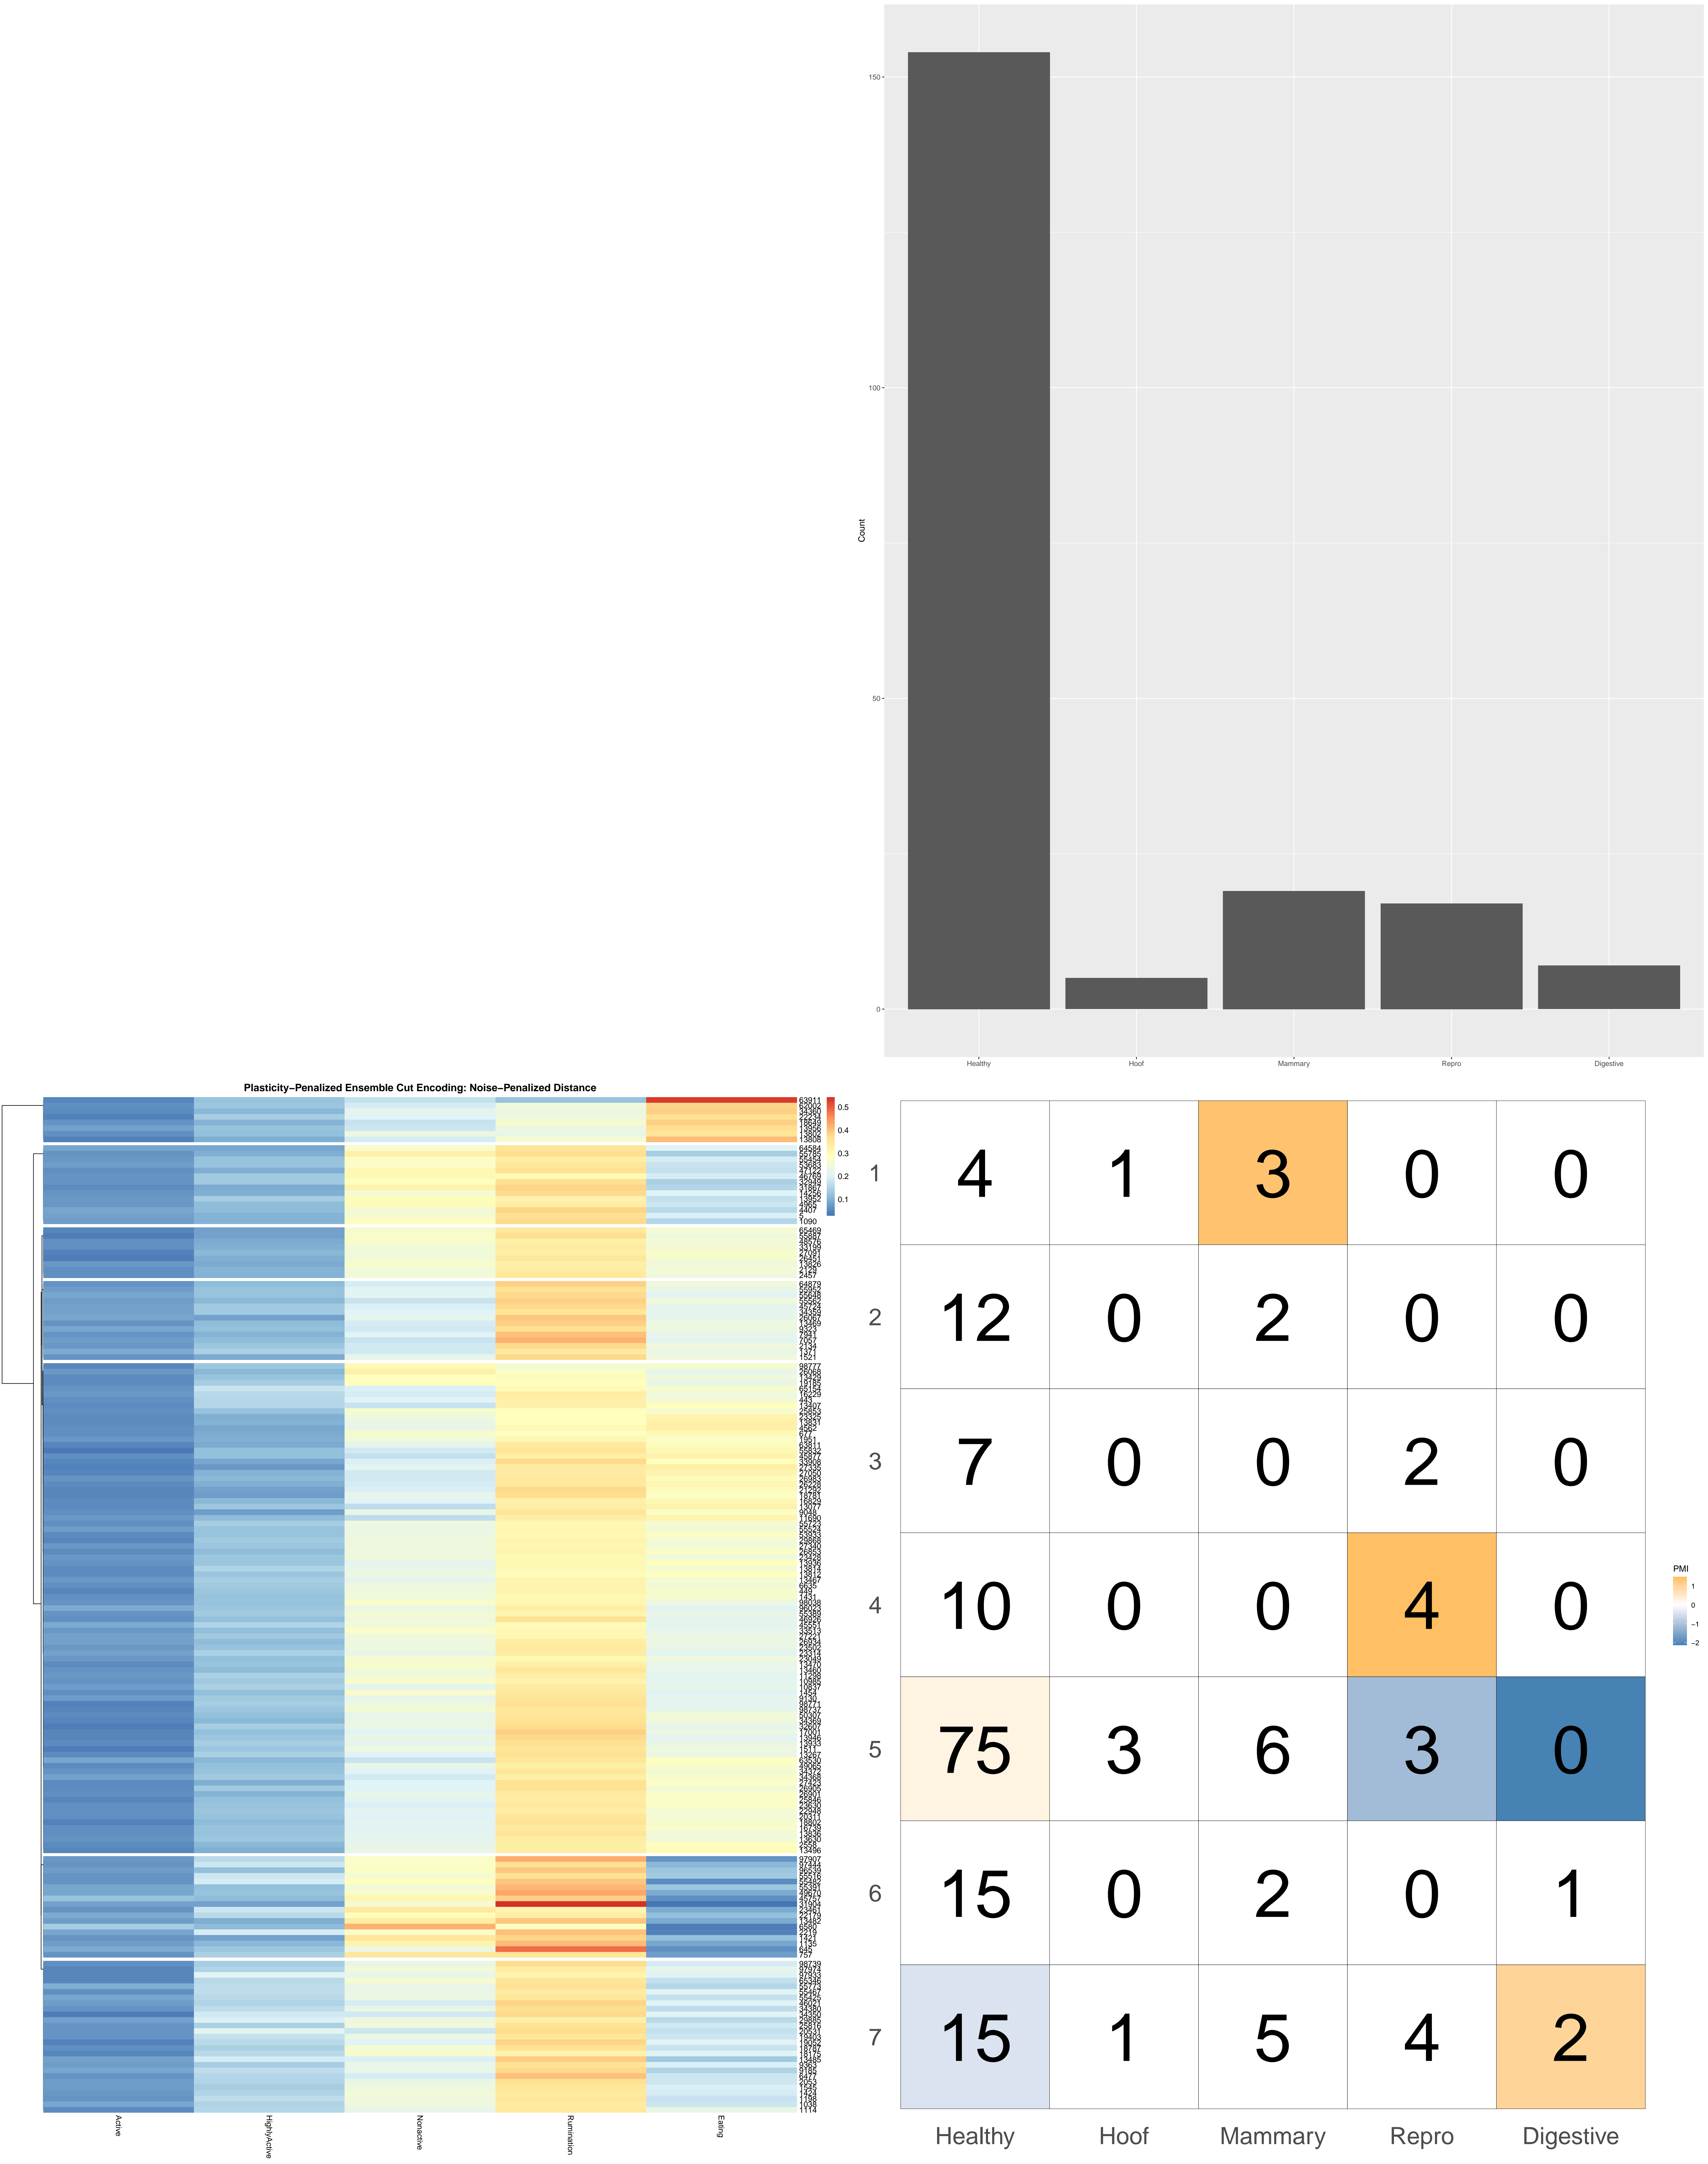

Supplement: s1 [file s1]

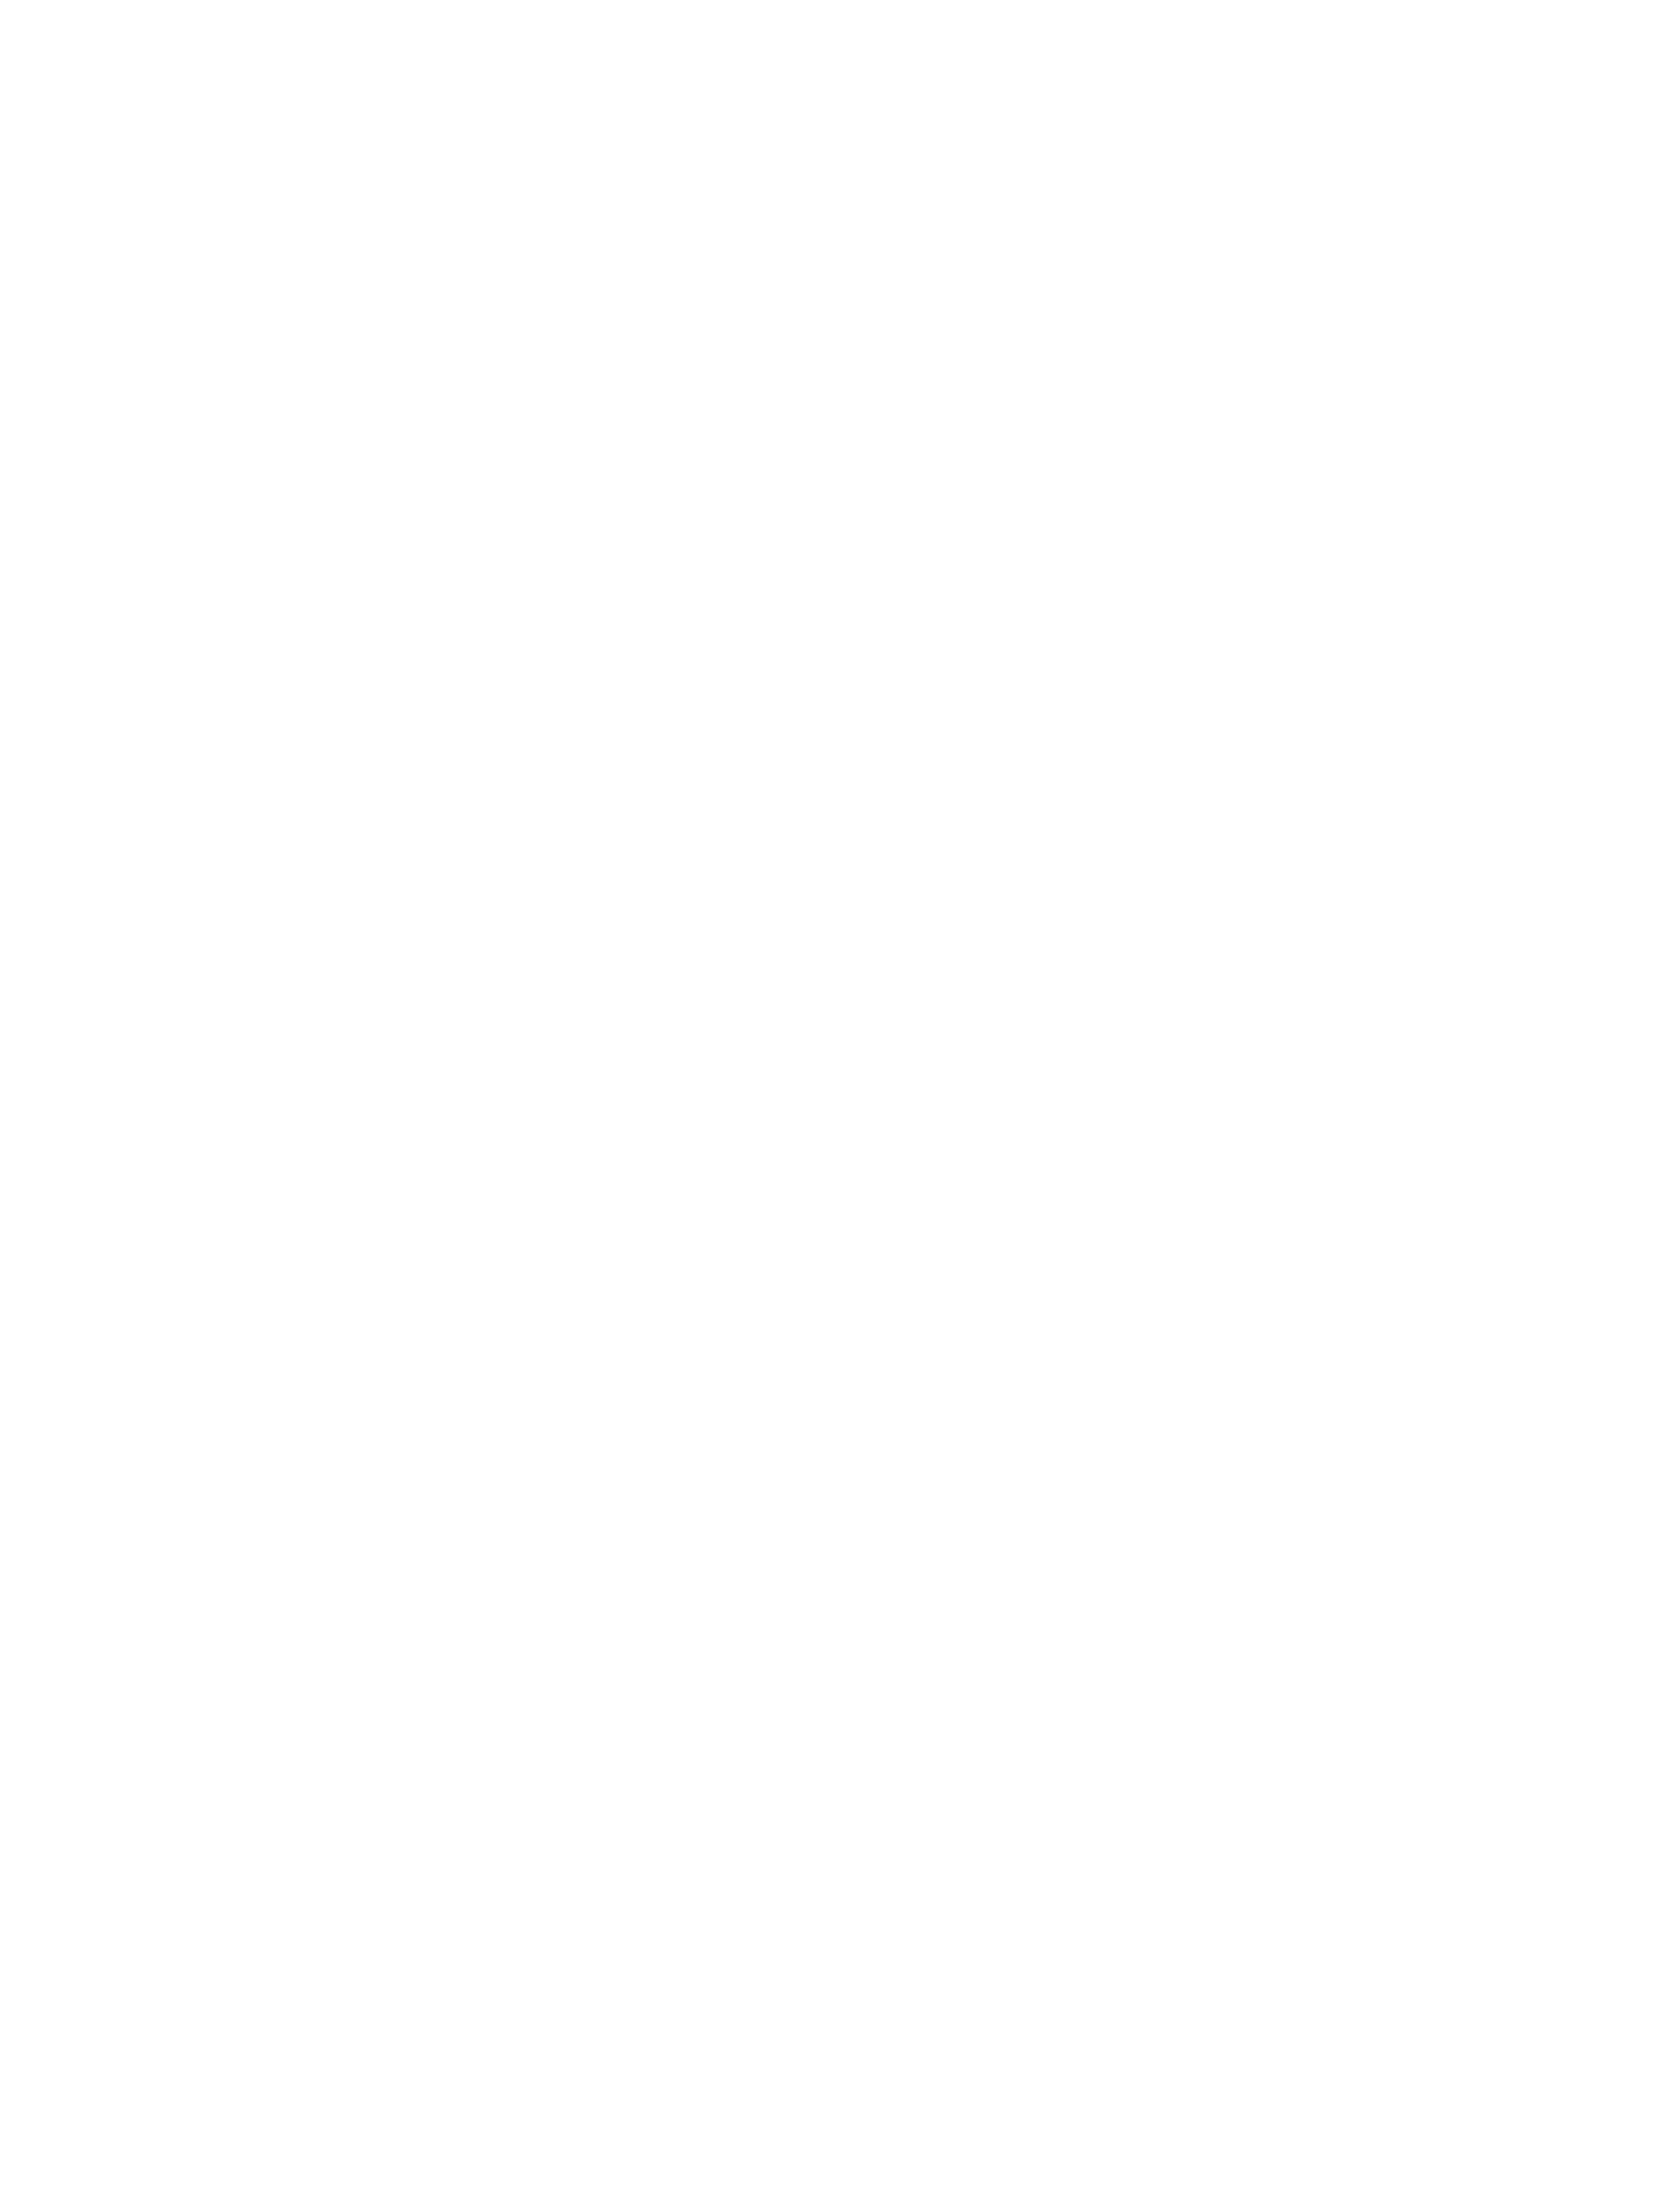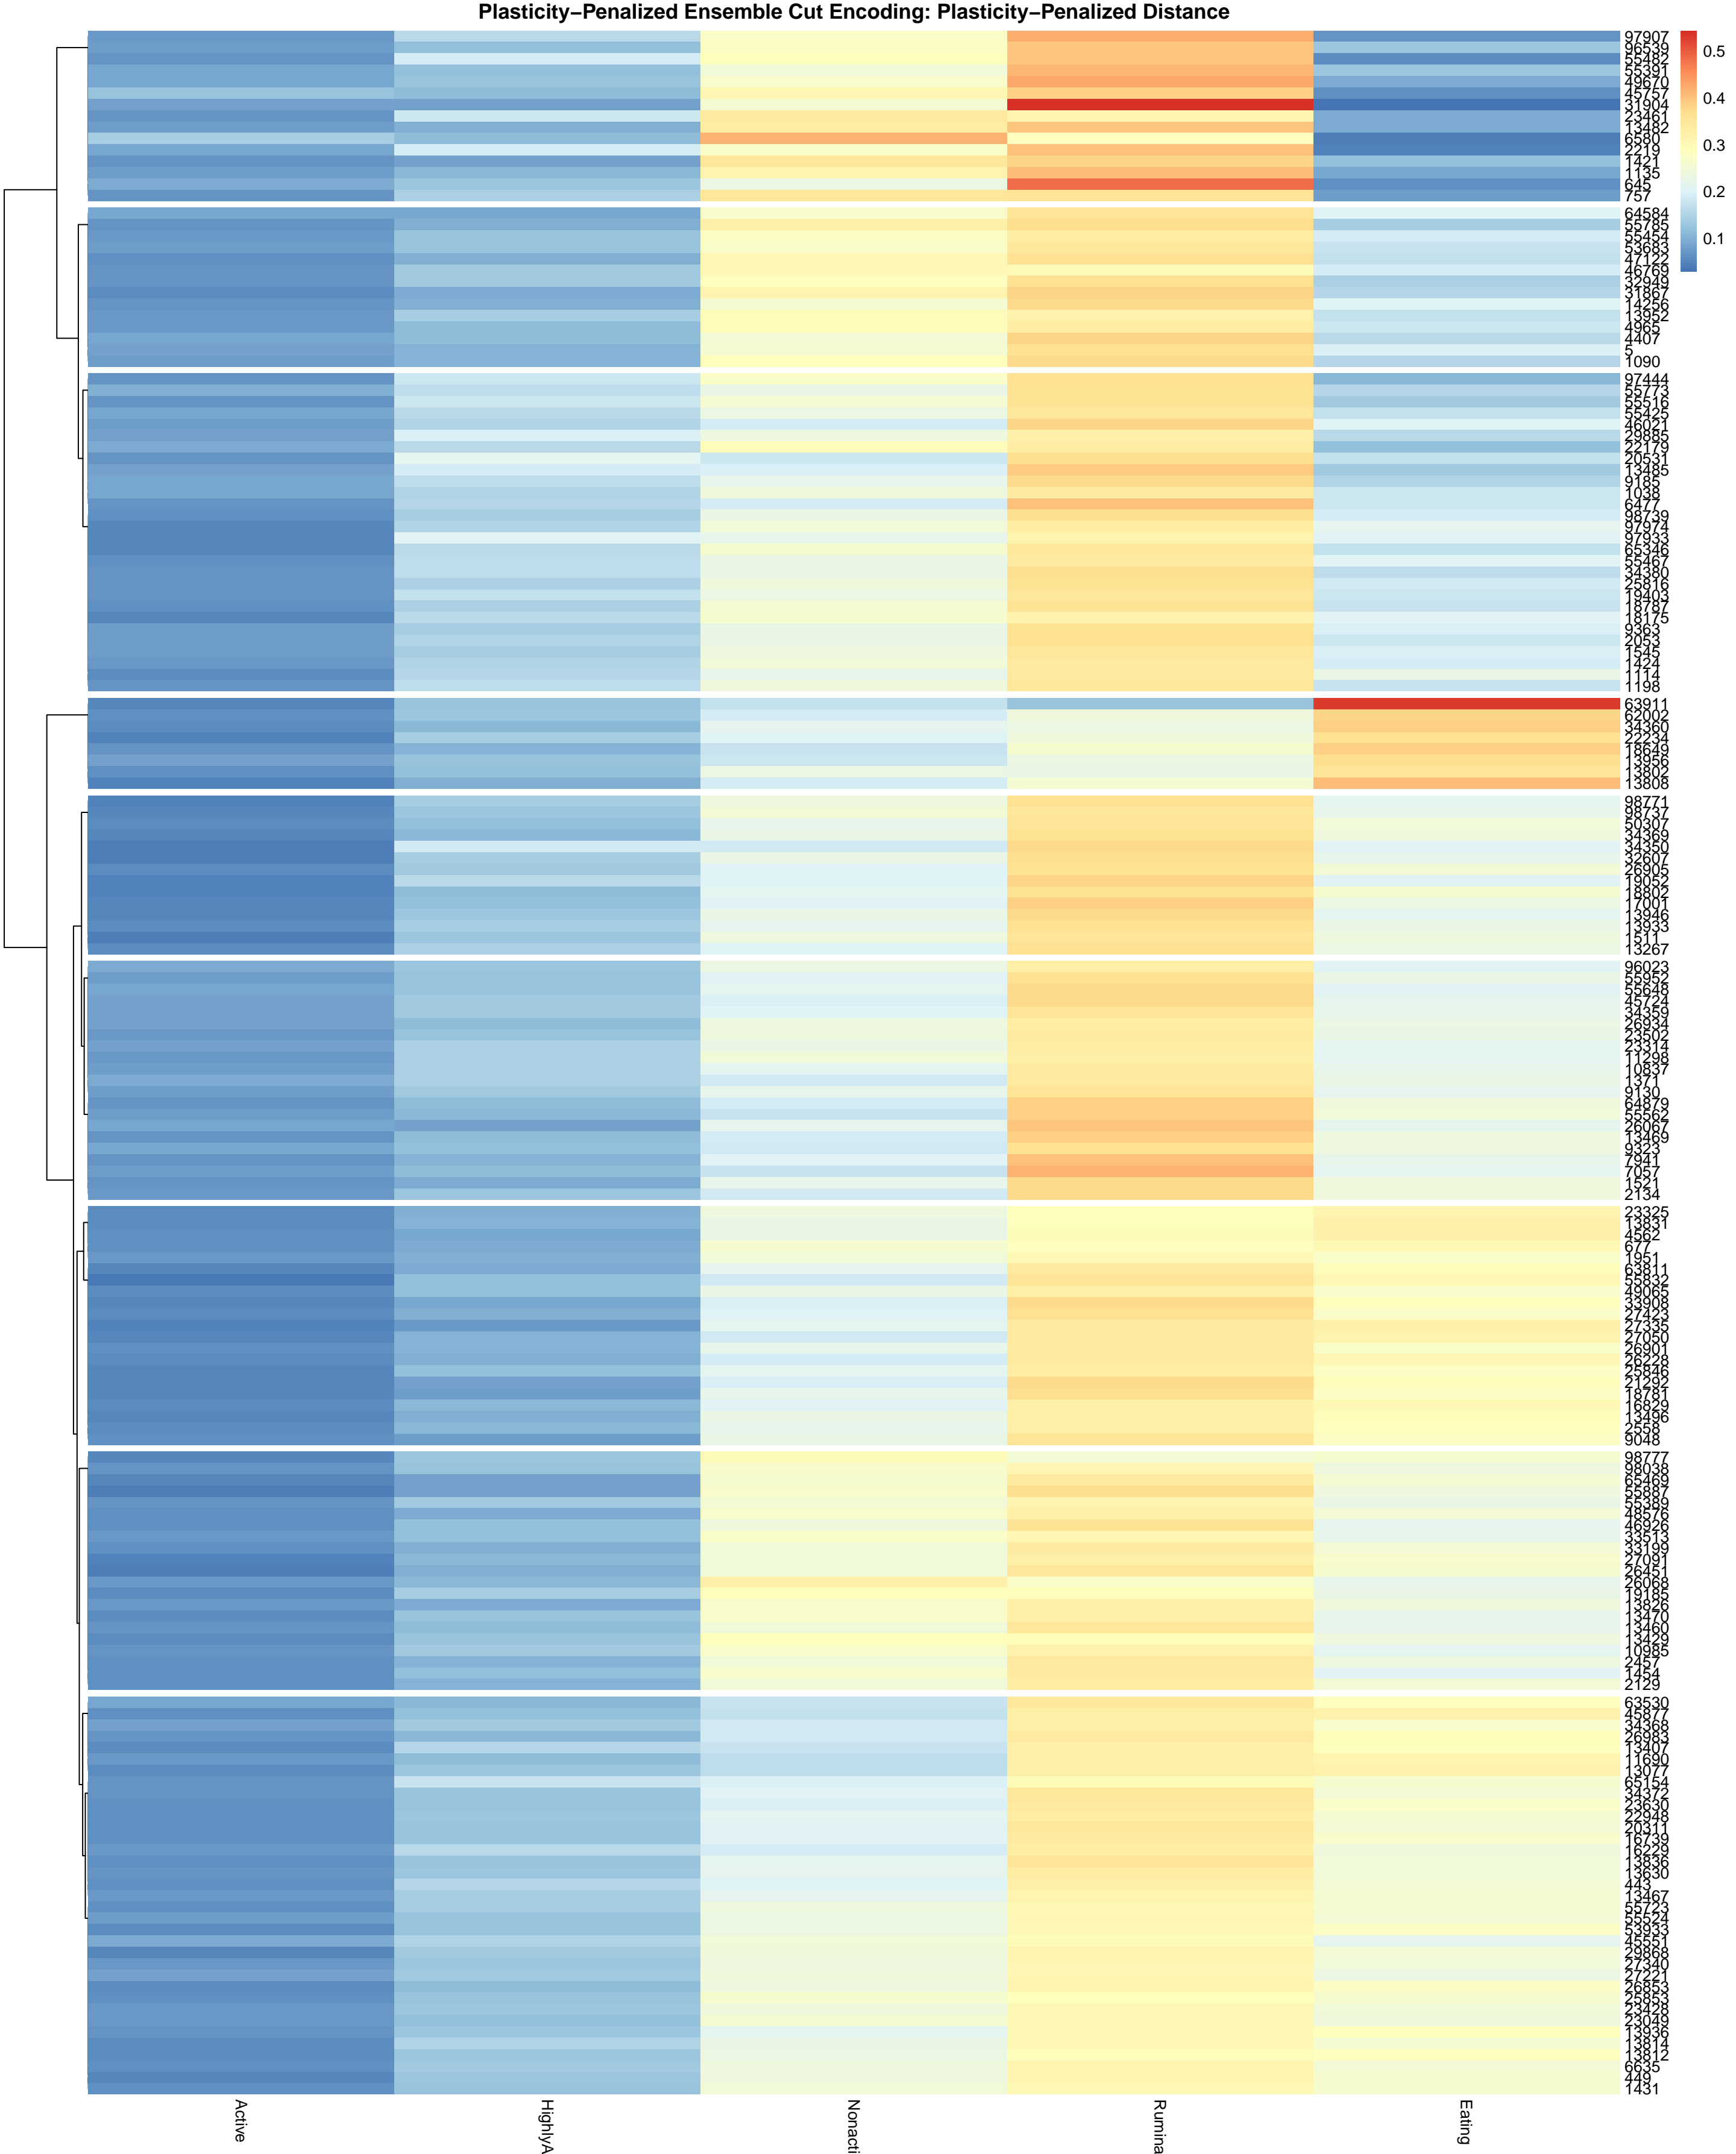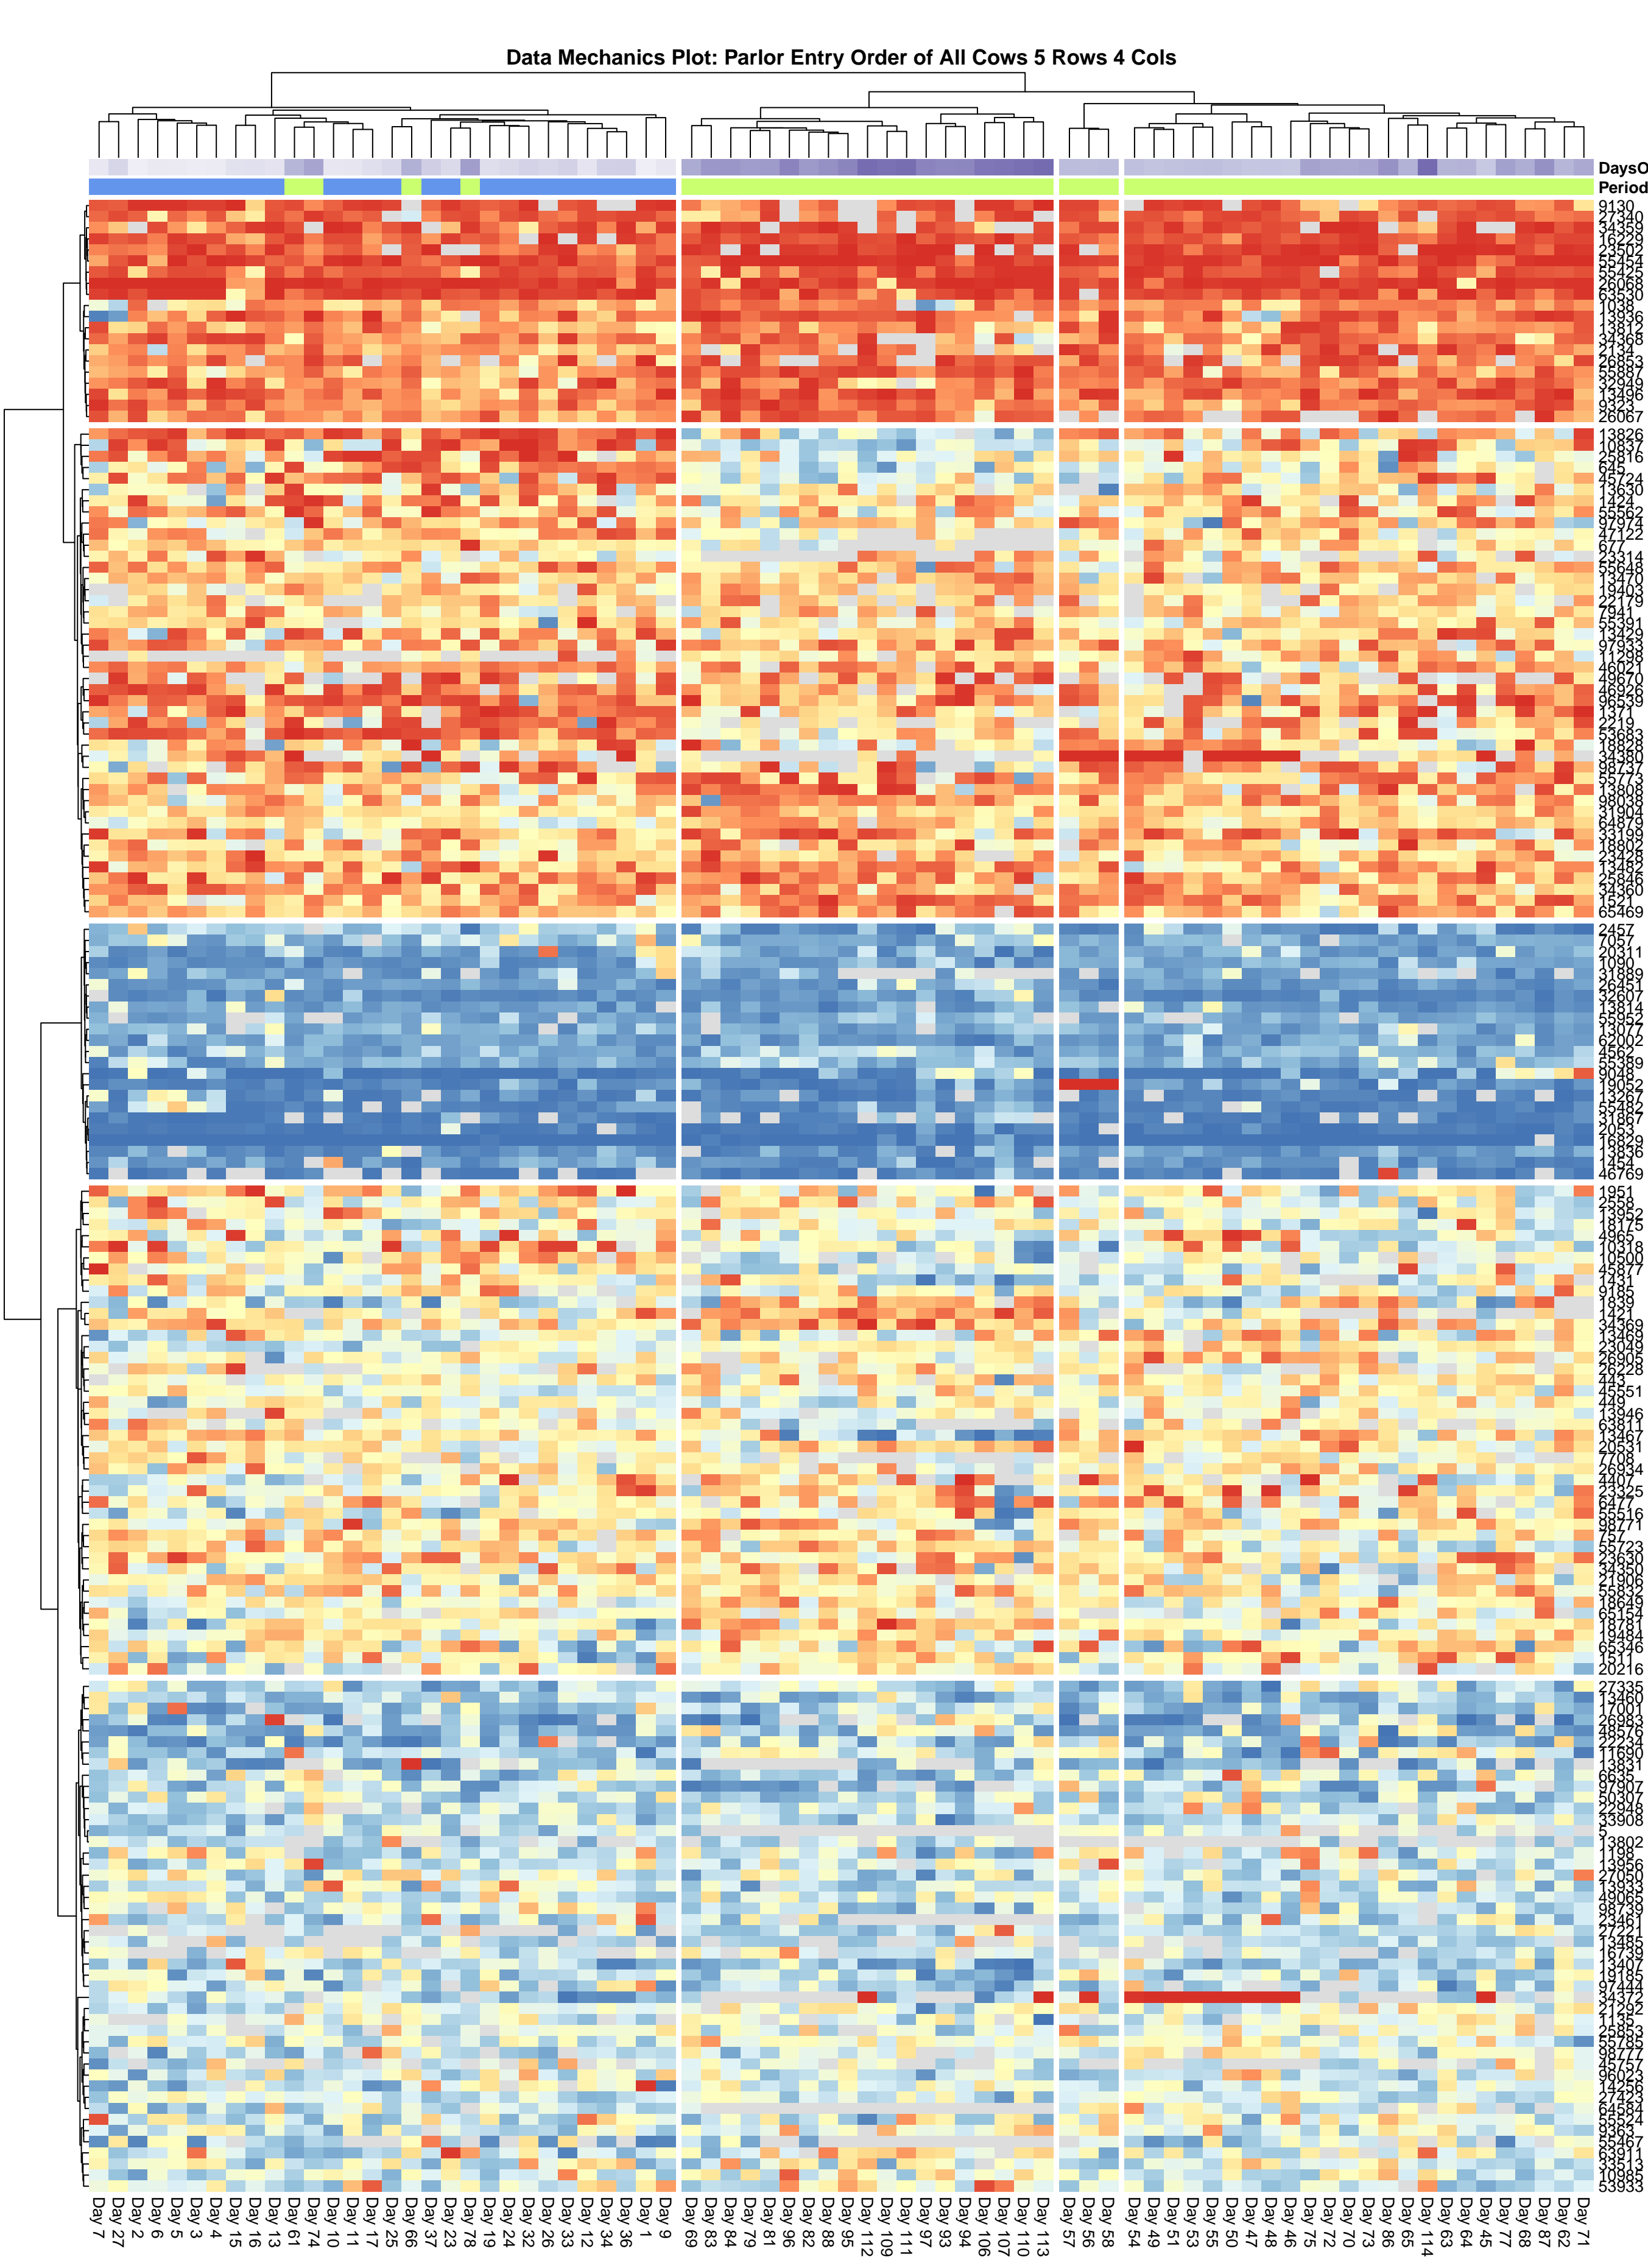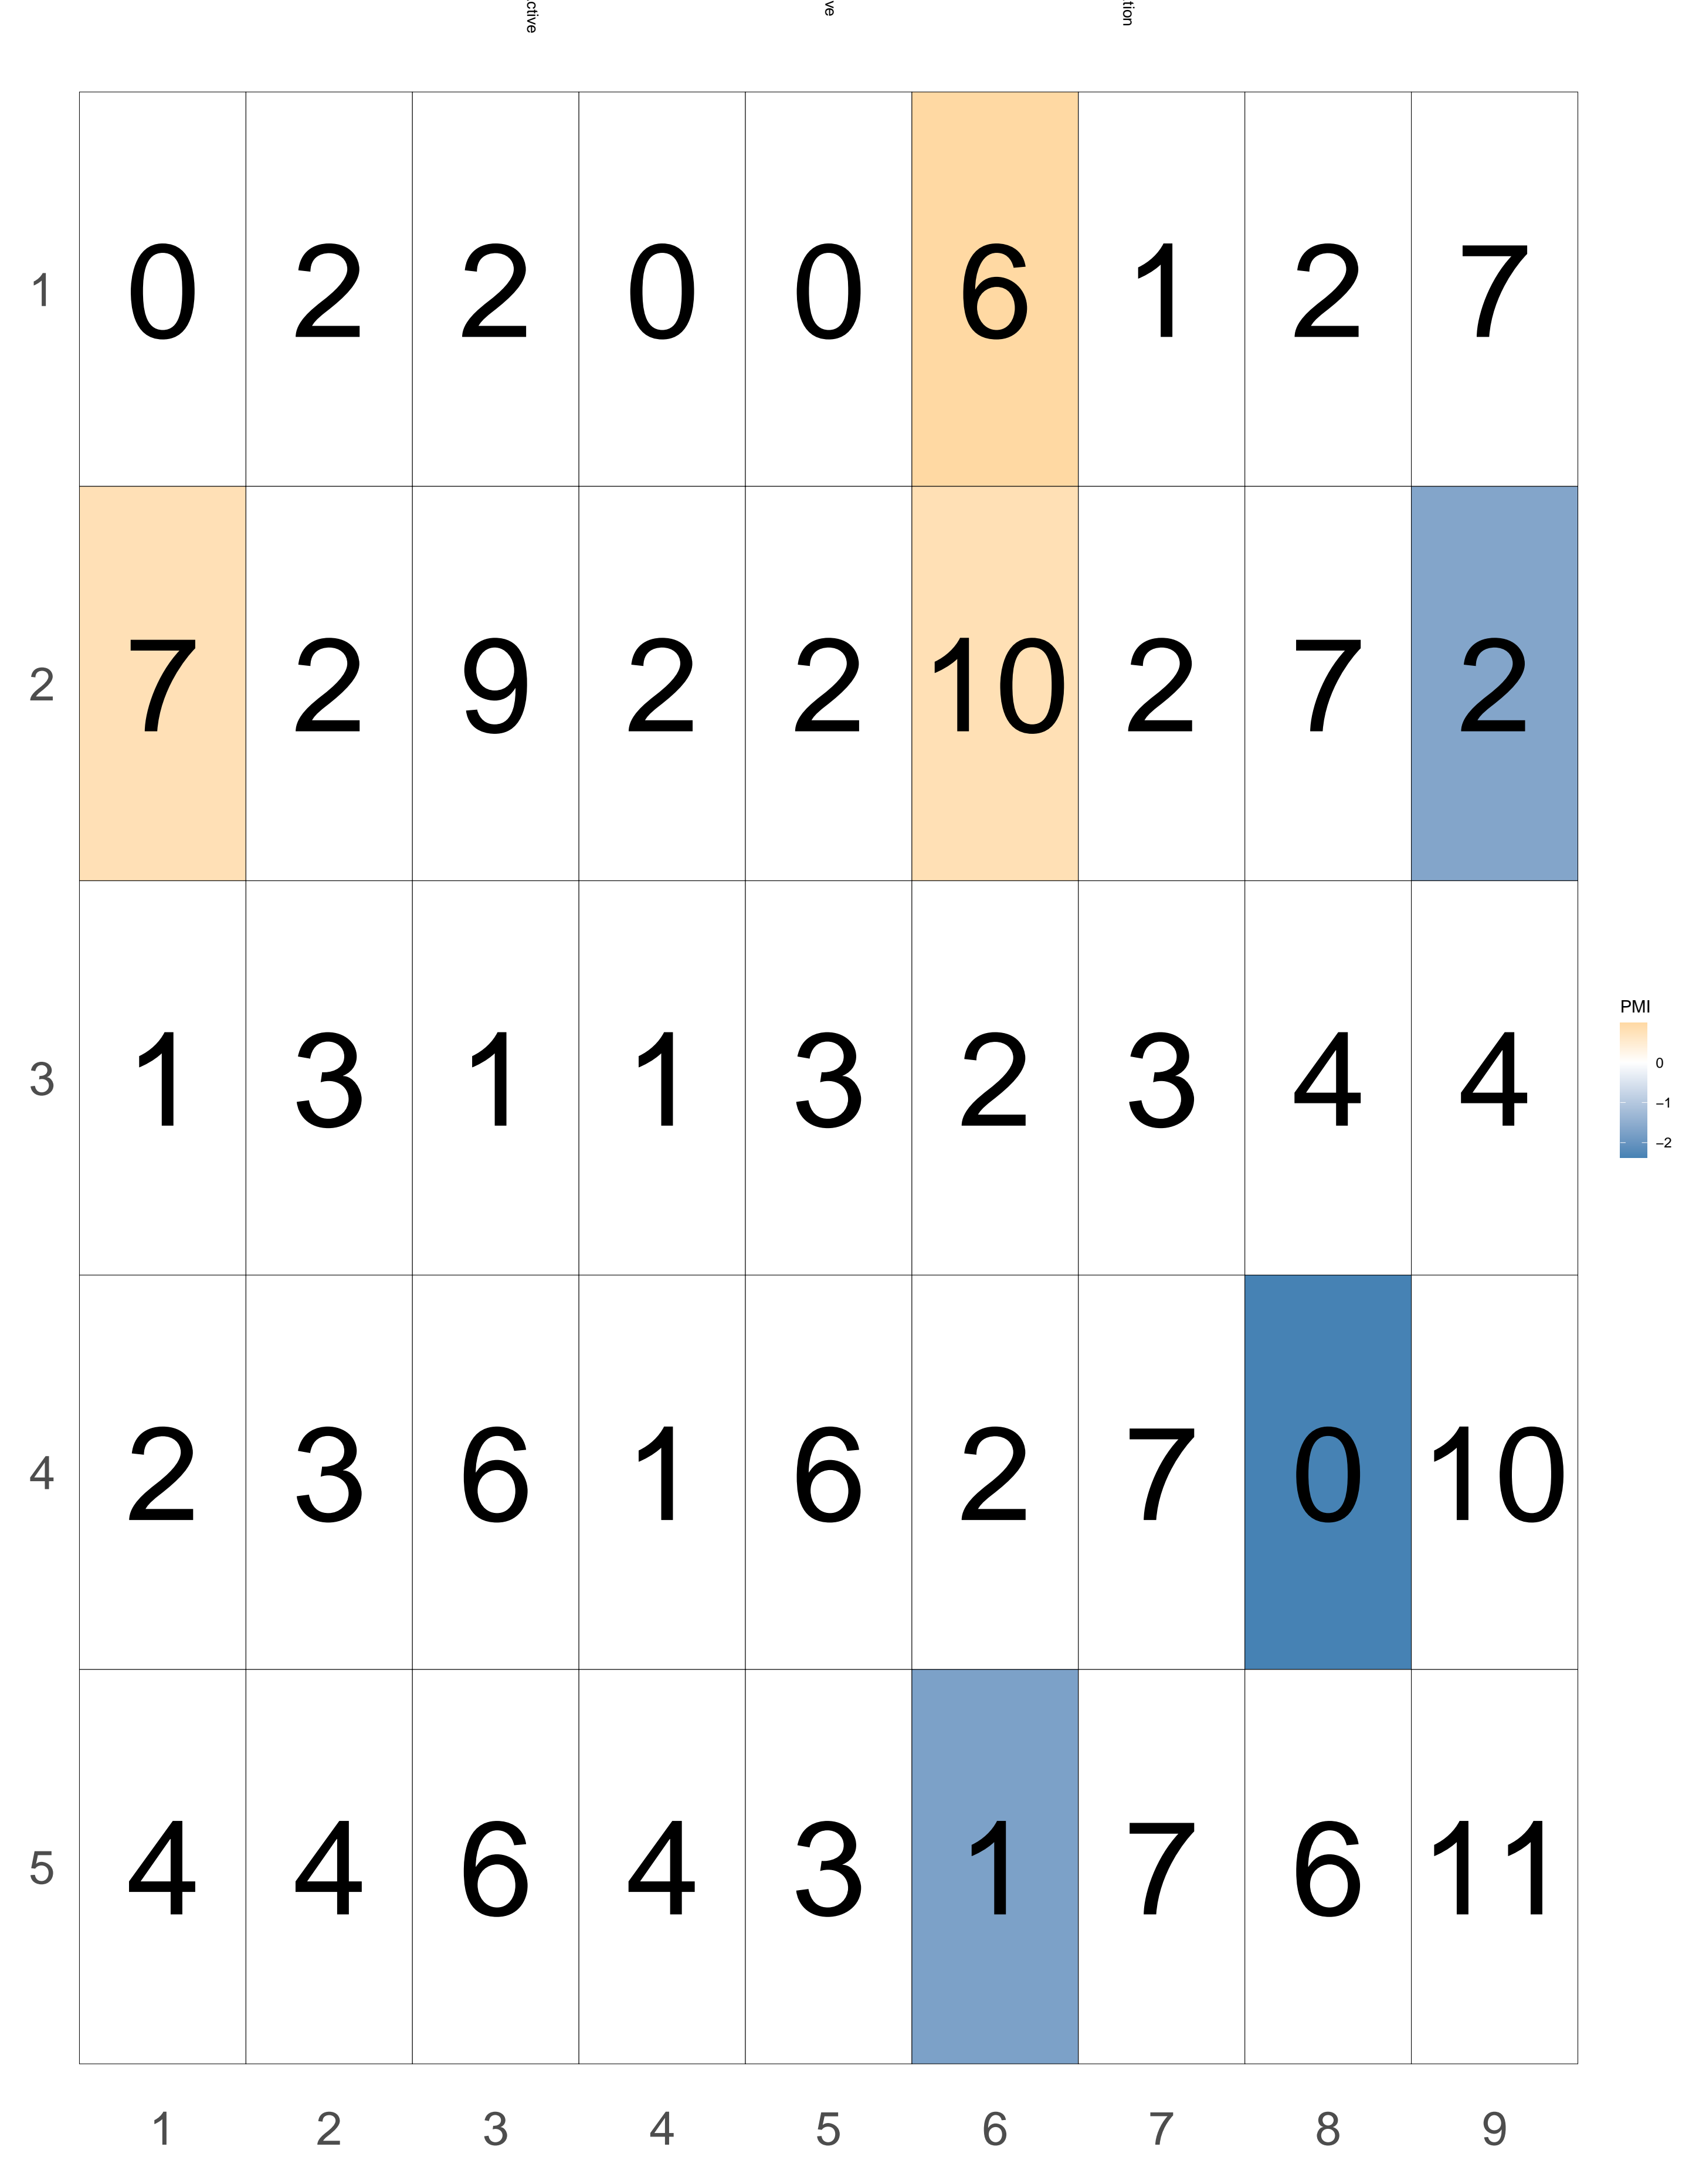

Supplement: s1 [file s1]

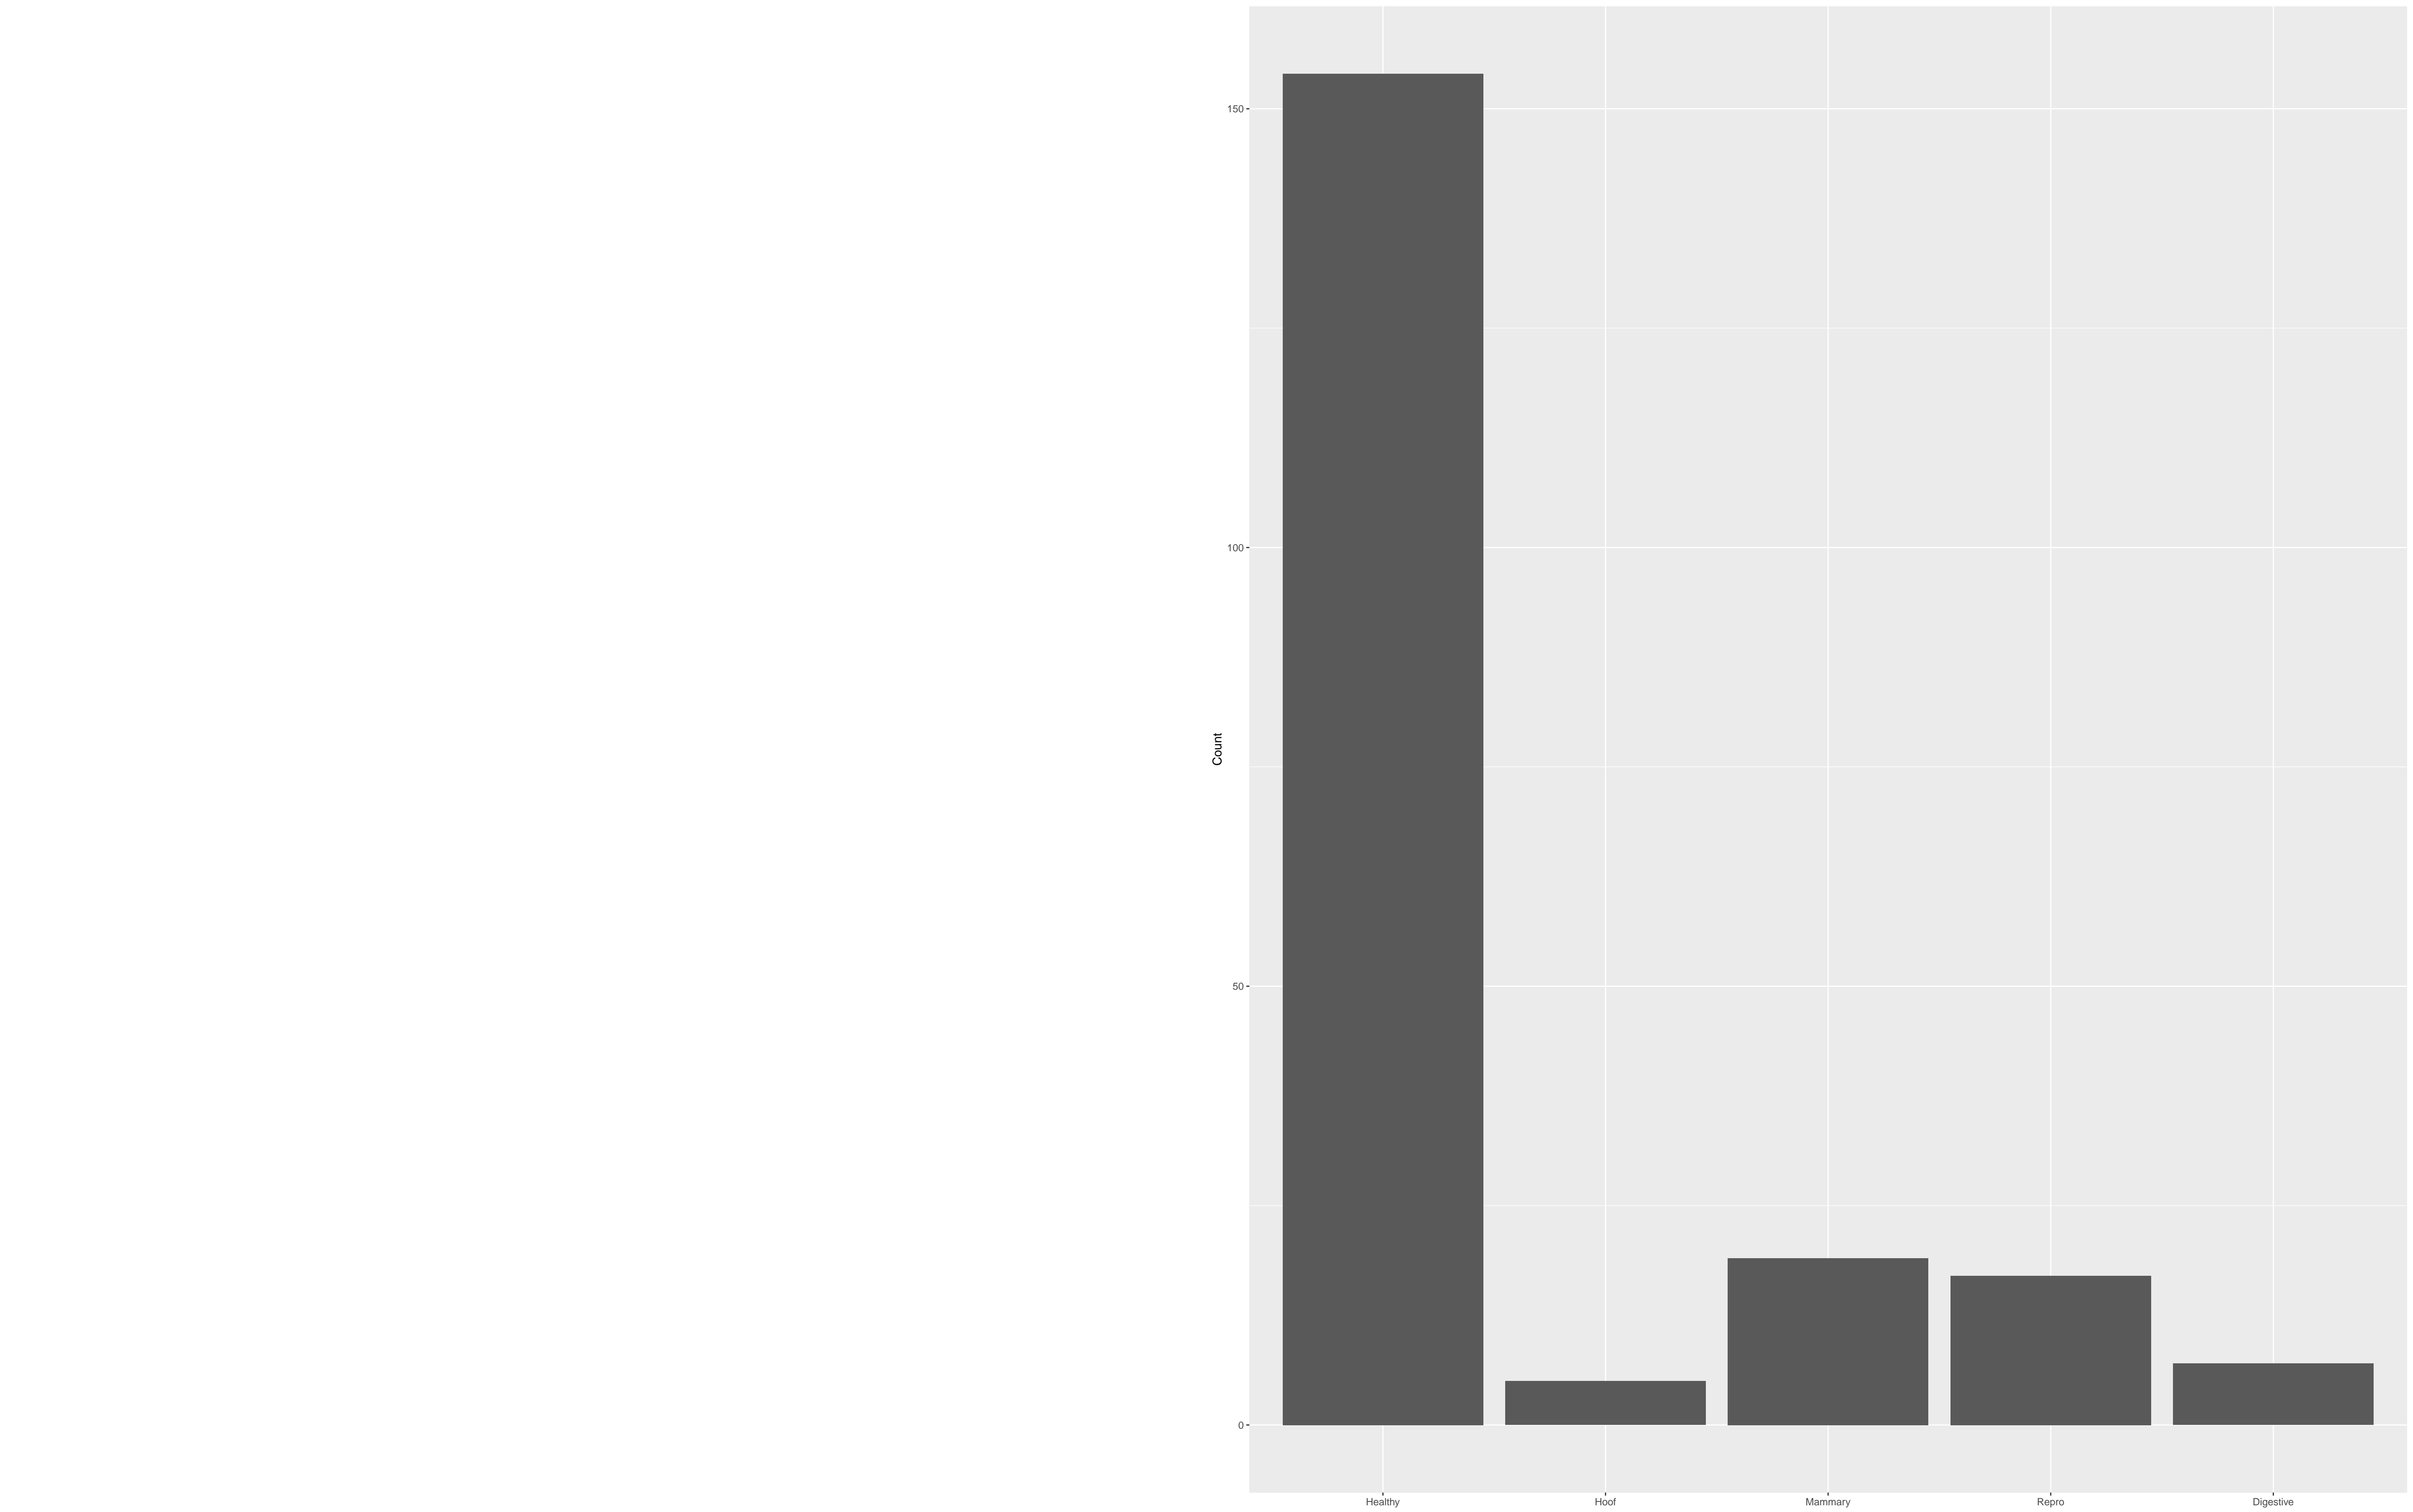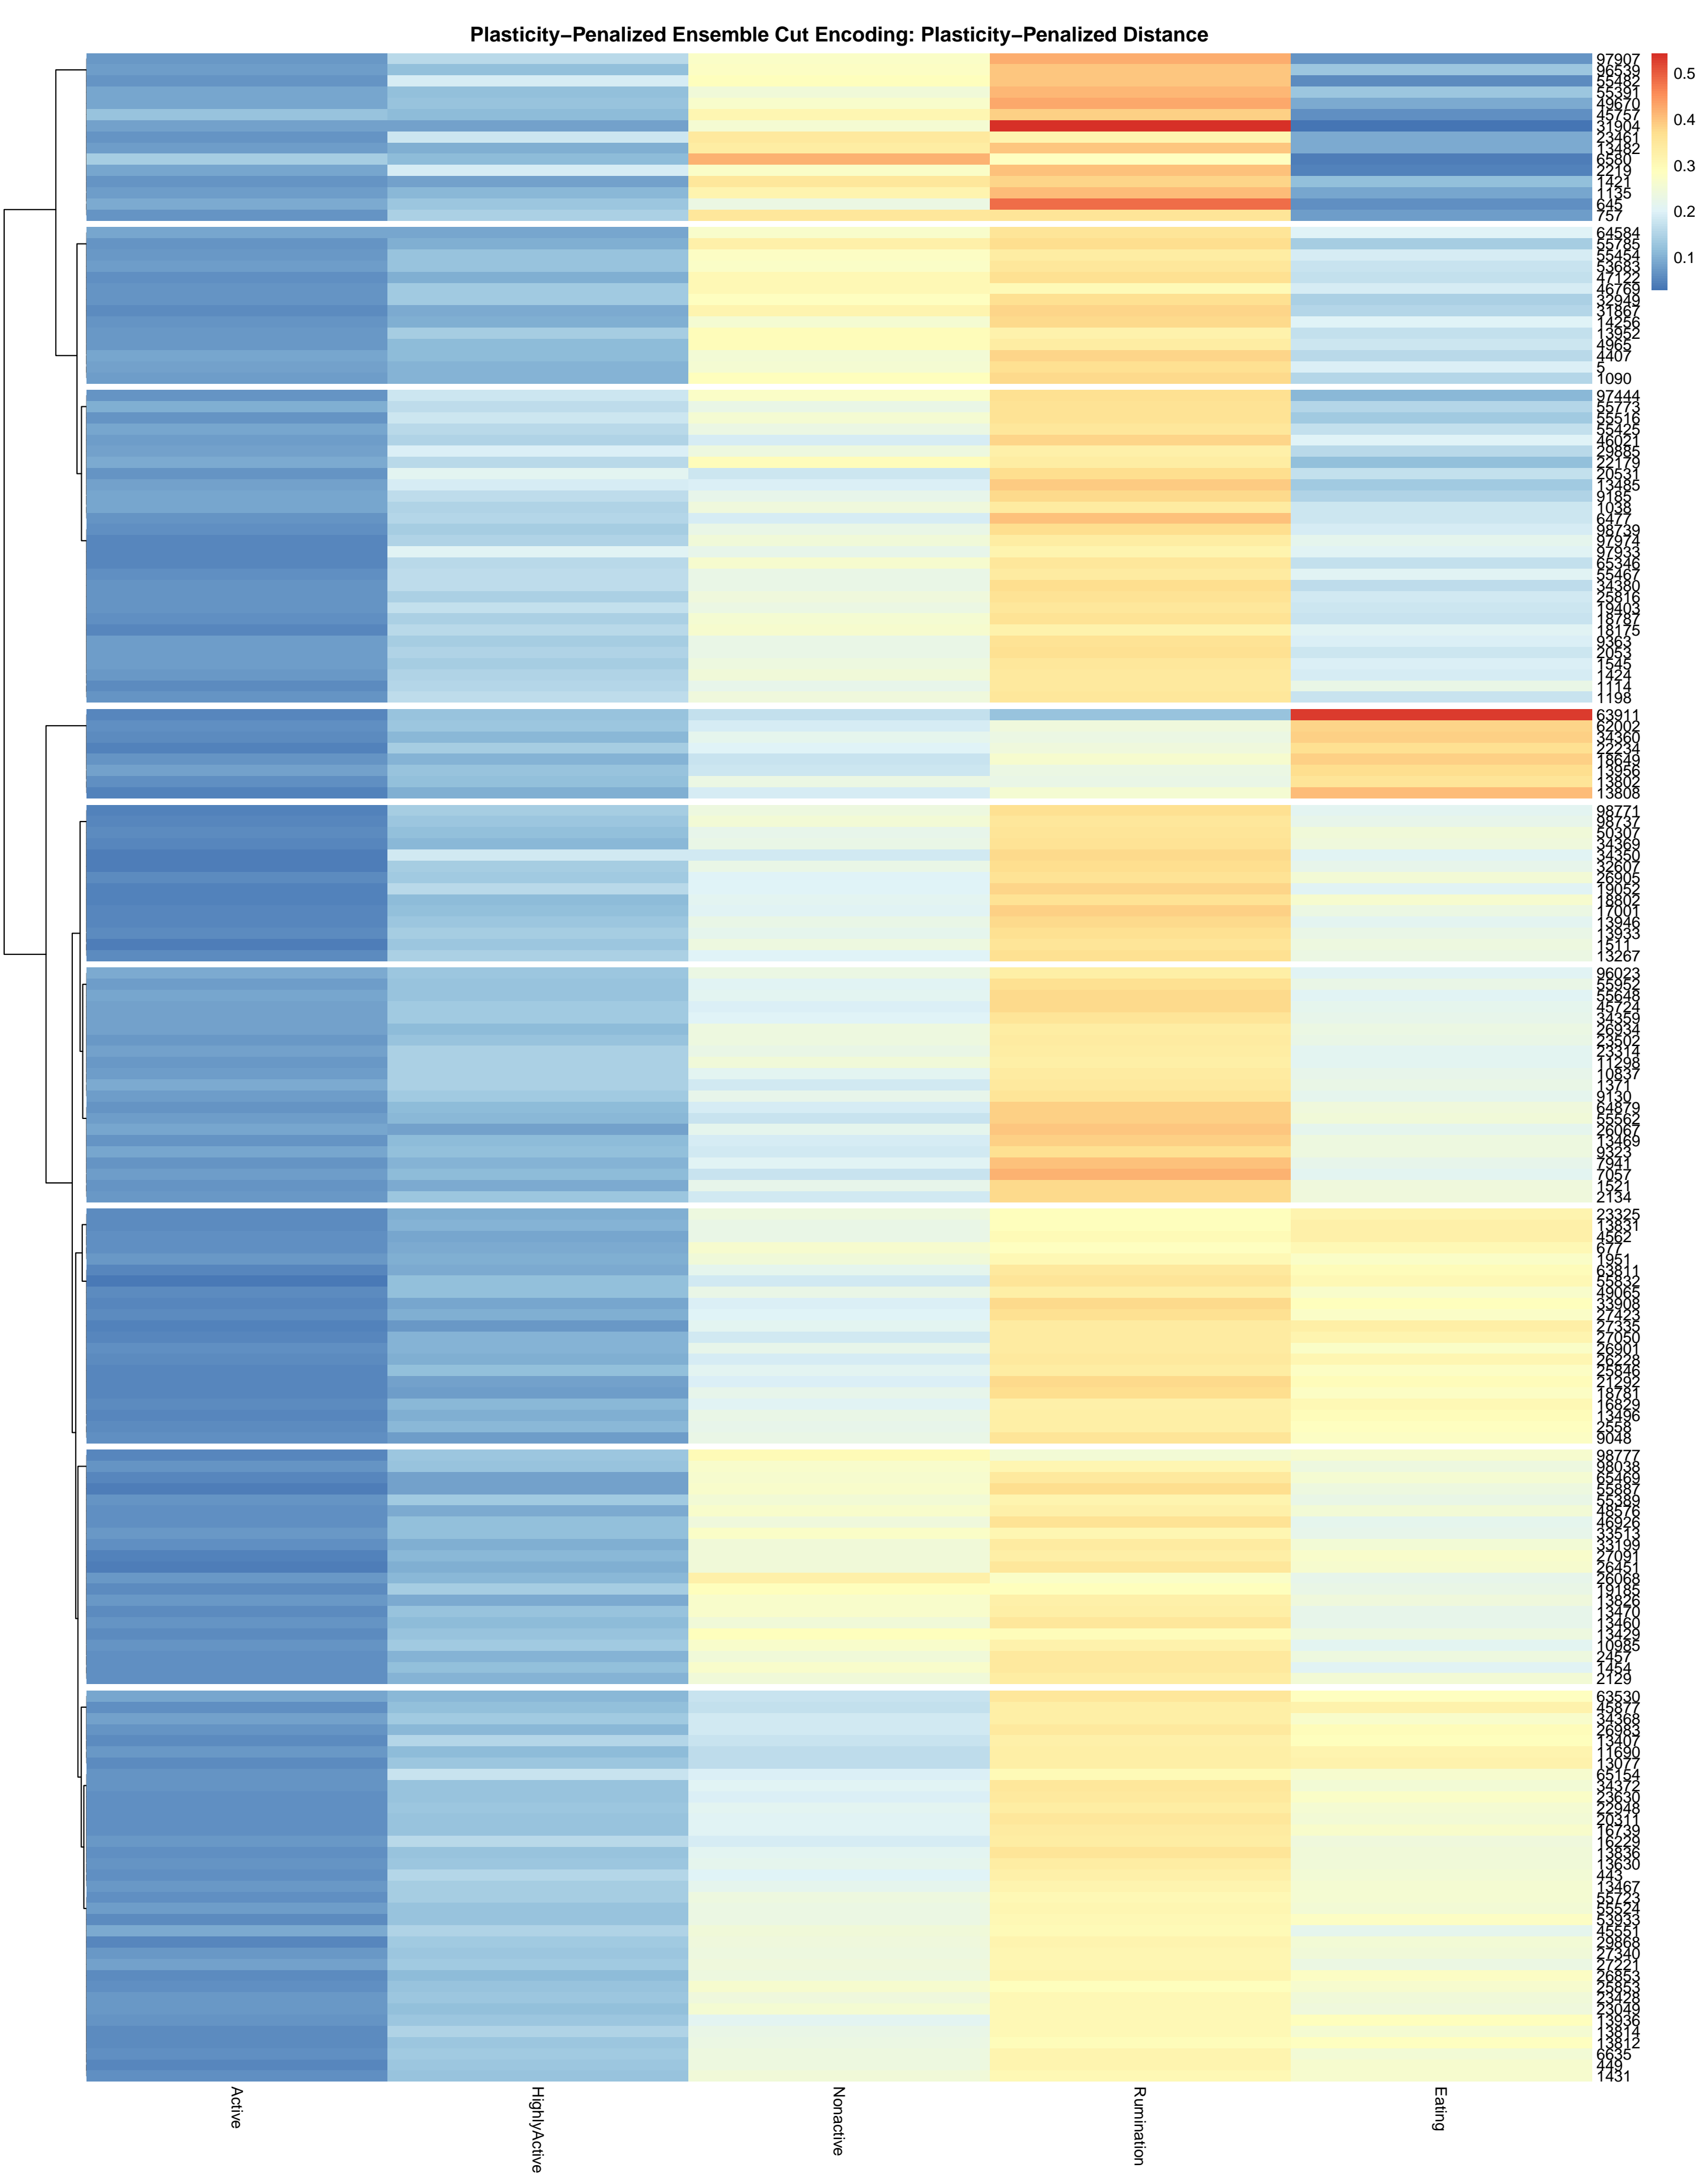

|   | Healthy | Hoof | Mammary | Repro | Digestive |
|---|---------|------|---------|-------|-----------|
| 1 | 12      | 0    | 2       | 0     | 1         |
| 2 | 12      | 0    | 2       | 0     | 0         |
| 3 | 16      | 1    | 5       | 4     | 2         |
| 4 | 4       | 1    | 3       | 0     | 0         |
| 5 | 14      | 0    | 0       | 0     | 0         |
| 6 | 16      | 1    | 0       | 4     | 0         |
| 7 | 19      | 0    | 1       | 1     | 0         |
| 8 | 16      | 0    | 1       | 4     | 0         |
| 9 | 29      | 2    | 4       | 0     | 0         |

Supplement: s1 [file s1]

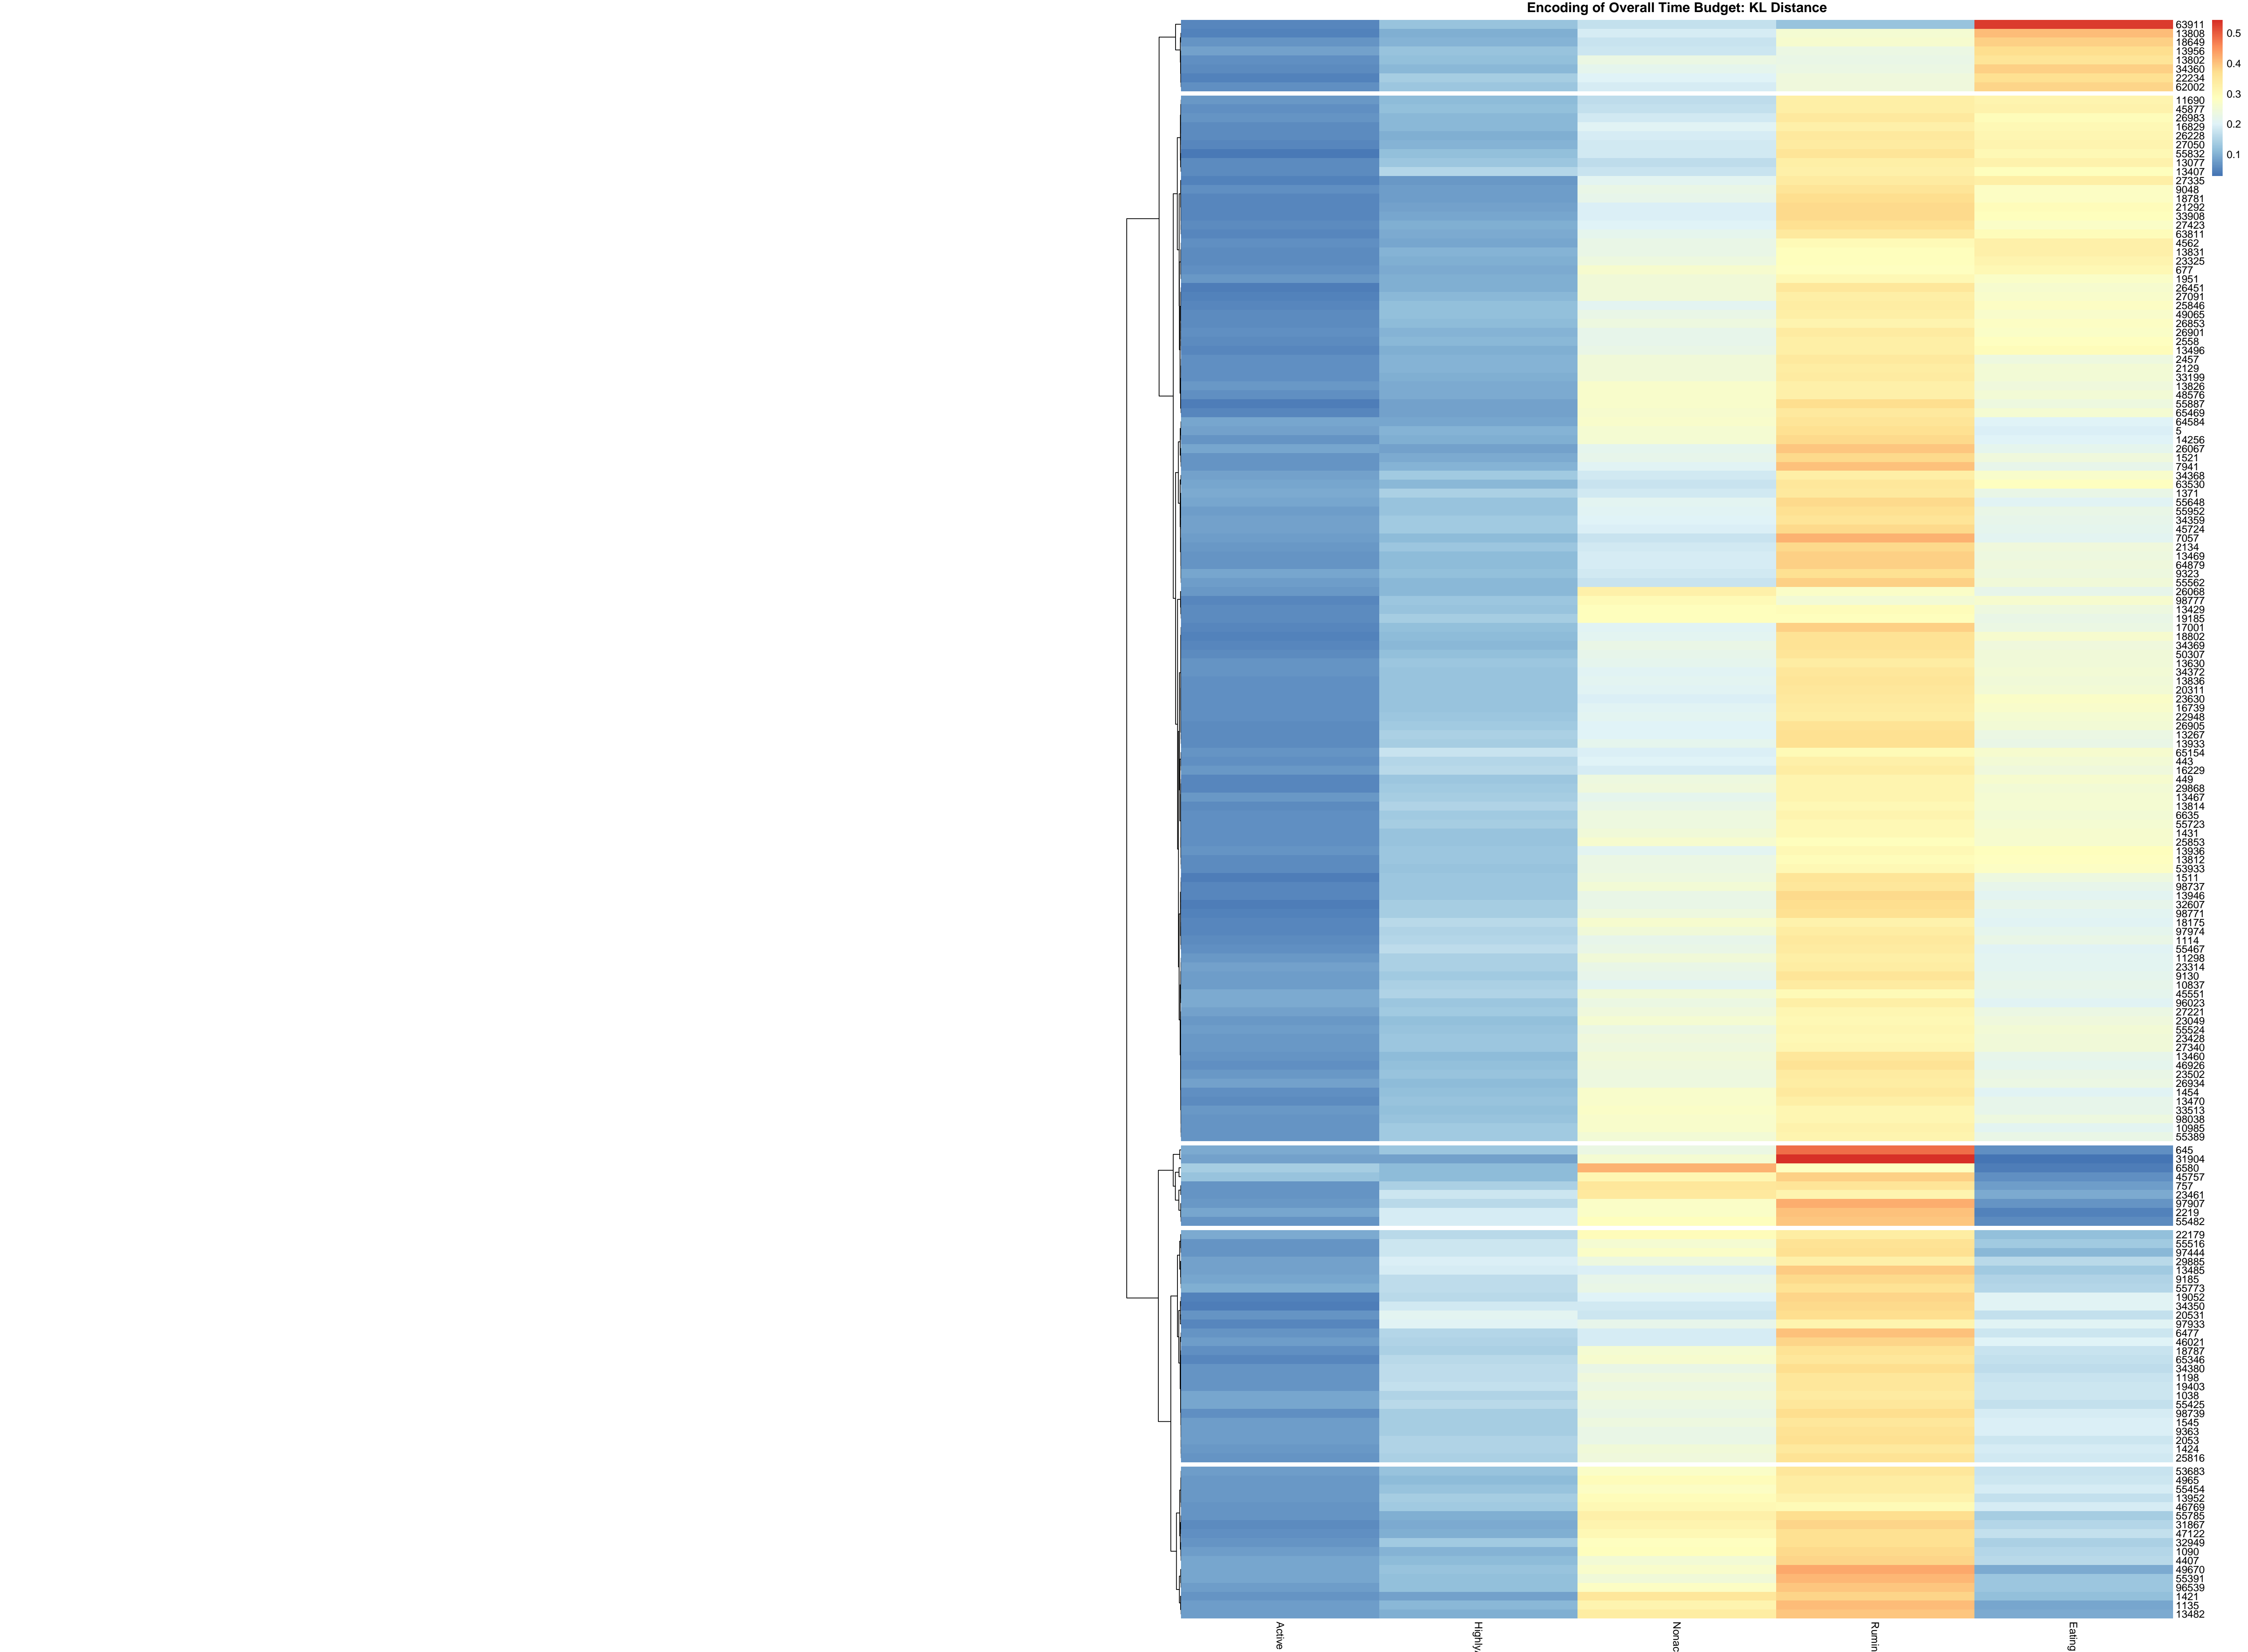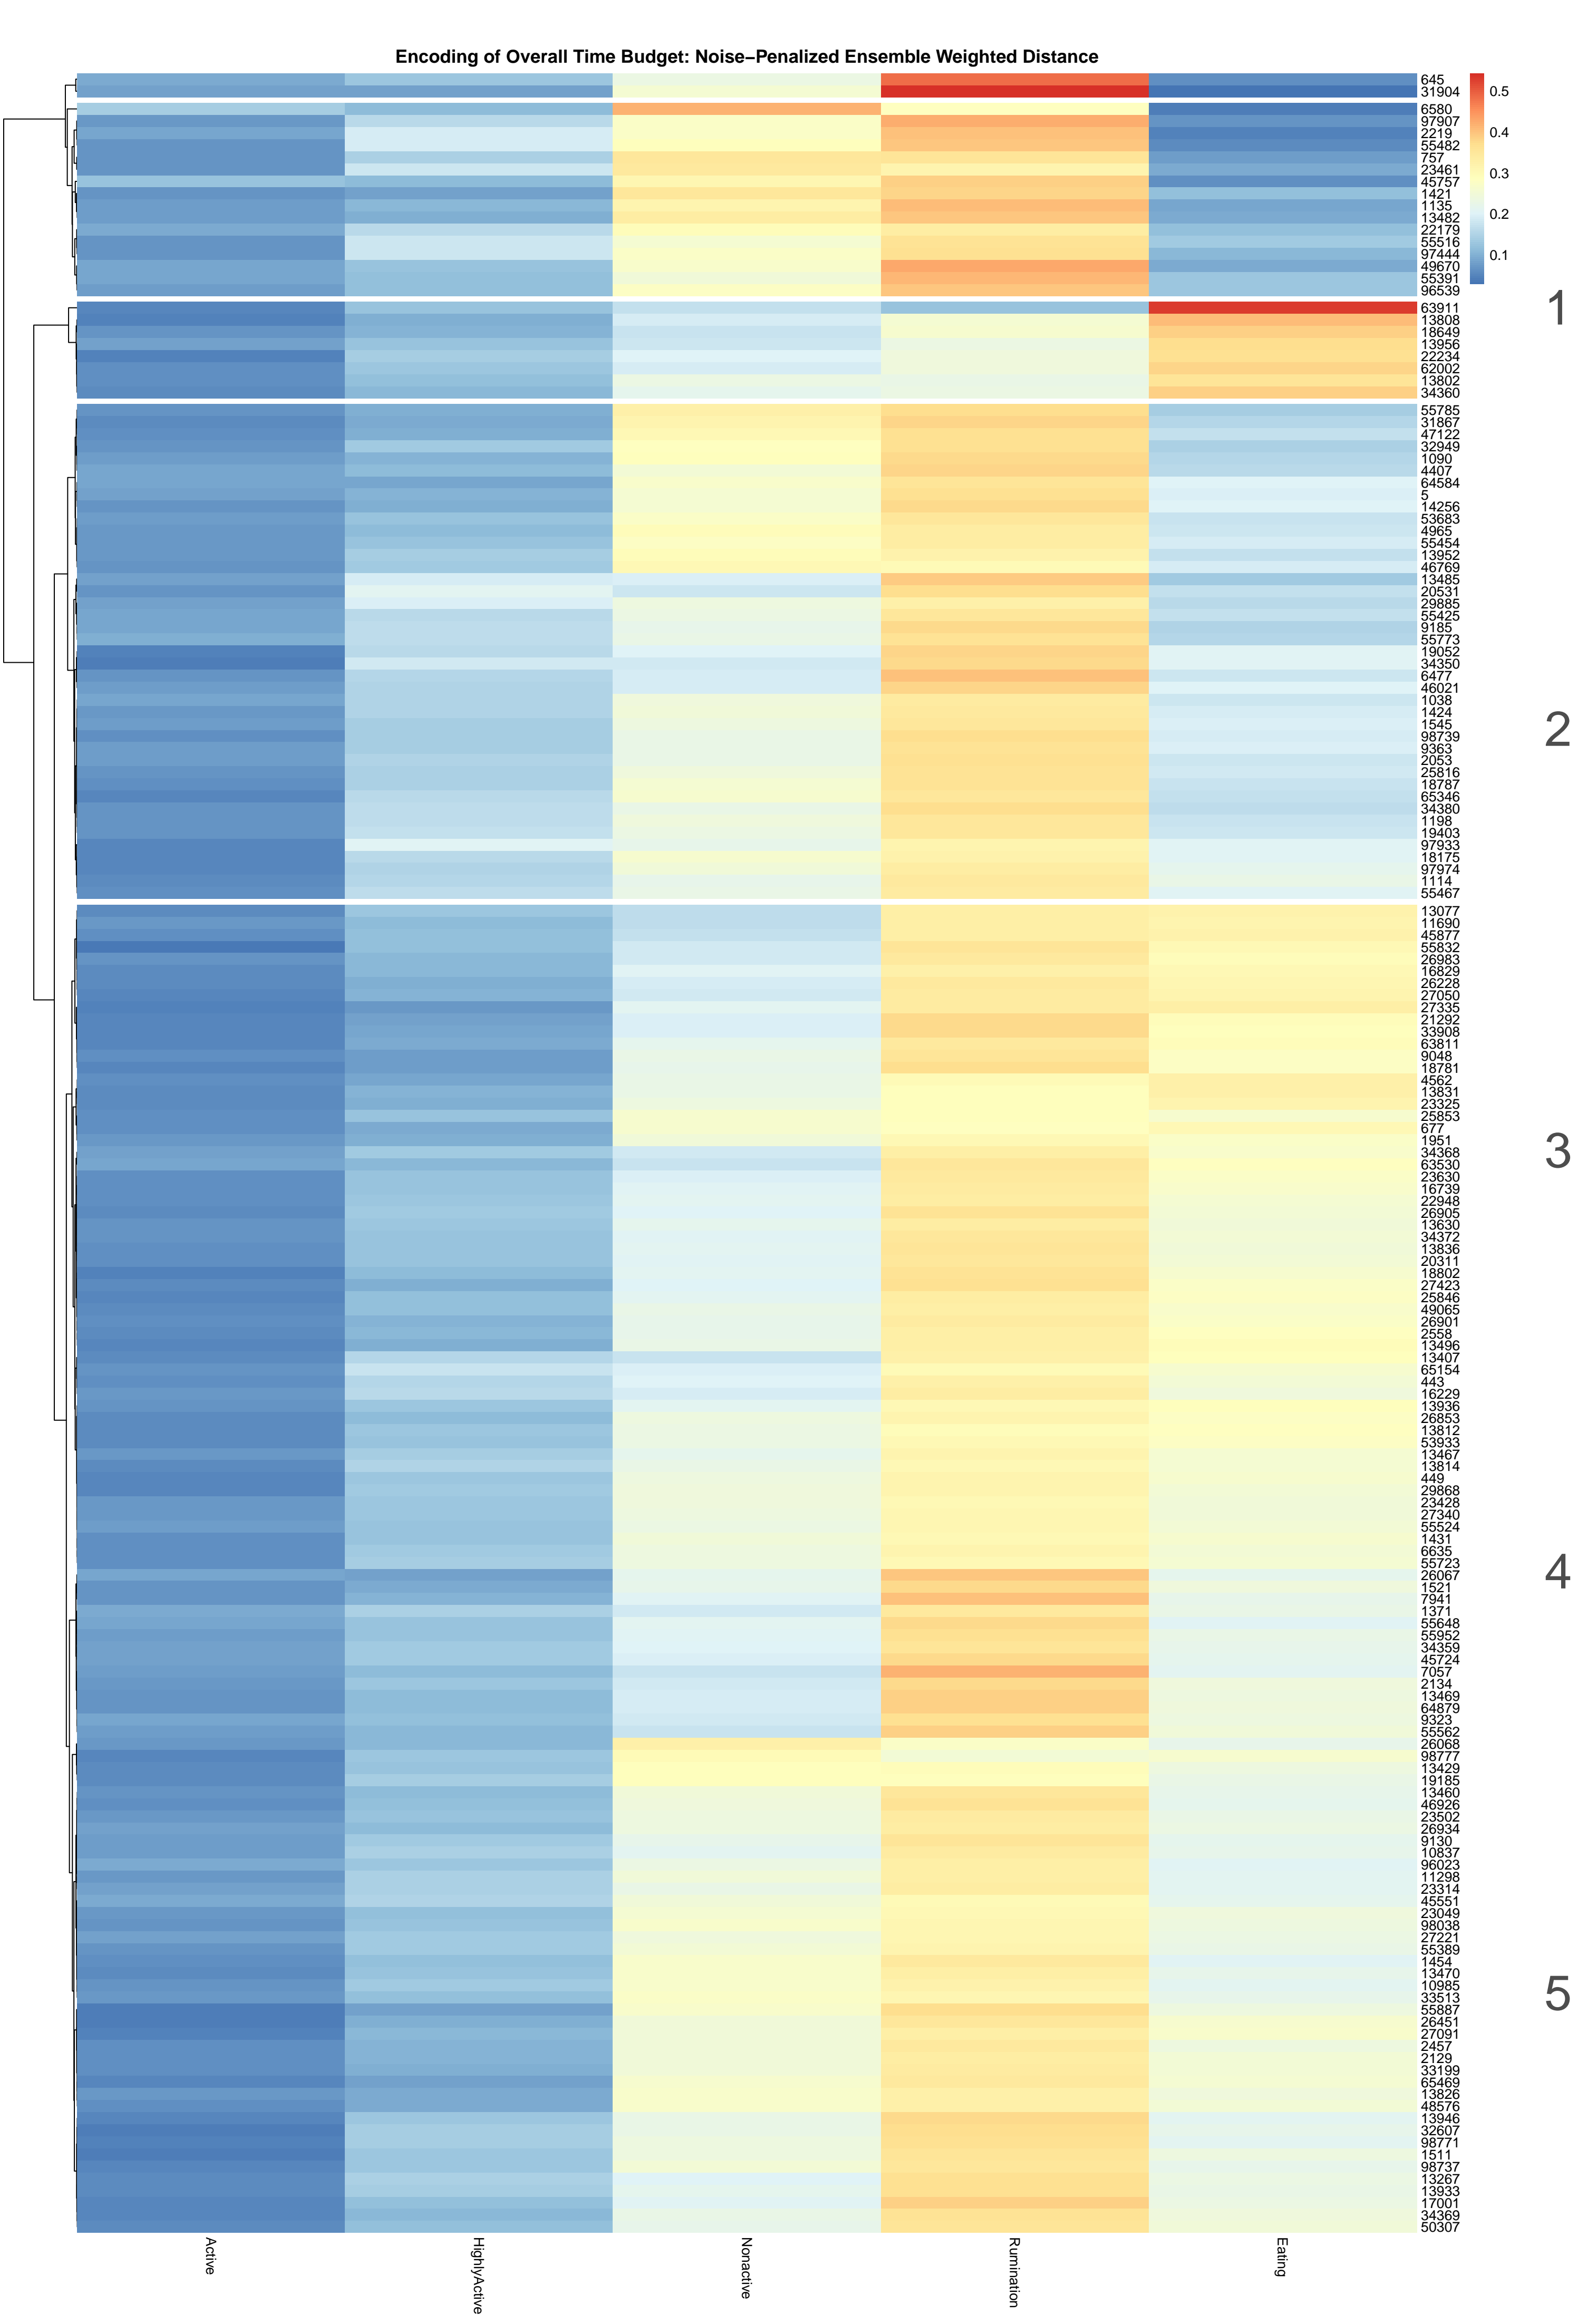

|   |   |     |   |    |    |
|---|---|-----|---|----|----|
| 1 | 0 | 0   | 2 | 0  | 0  |
| 2 | 0 | 0   | 7 | 3  | 6  |
| 3 | 8 | 0   | 0 | 0  | 0  |
| 4 | 0 | 7   | 0 | 23 | 11 |
| 5 | 0 | 110 | 0 | 0  | 0  |
|   | 1 | 2   | 3 | 4  | 5  |

Supplement: s1 [file s1]

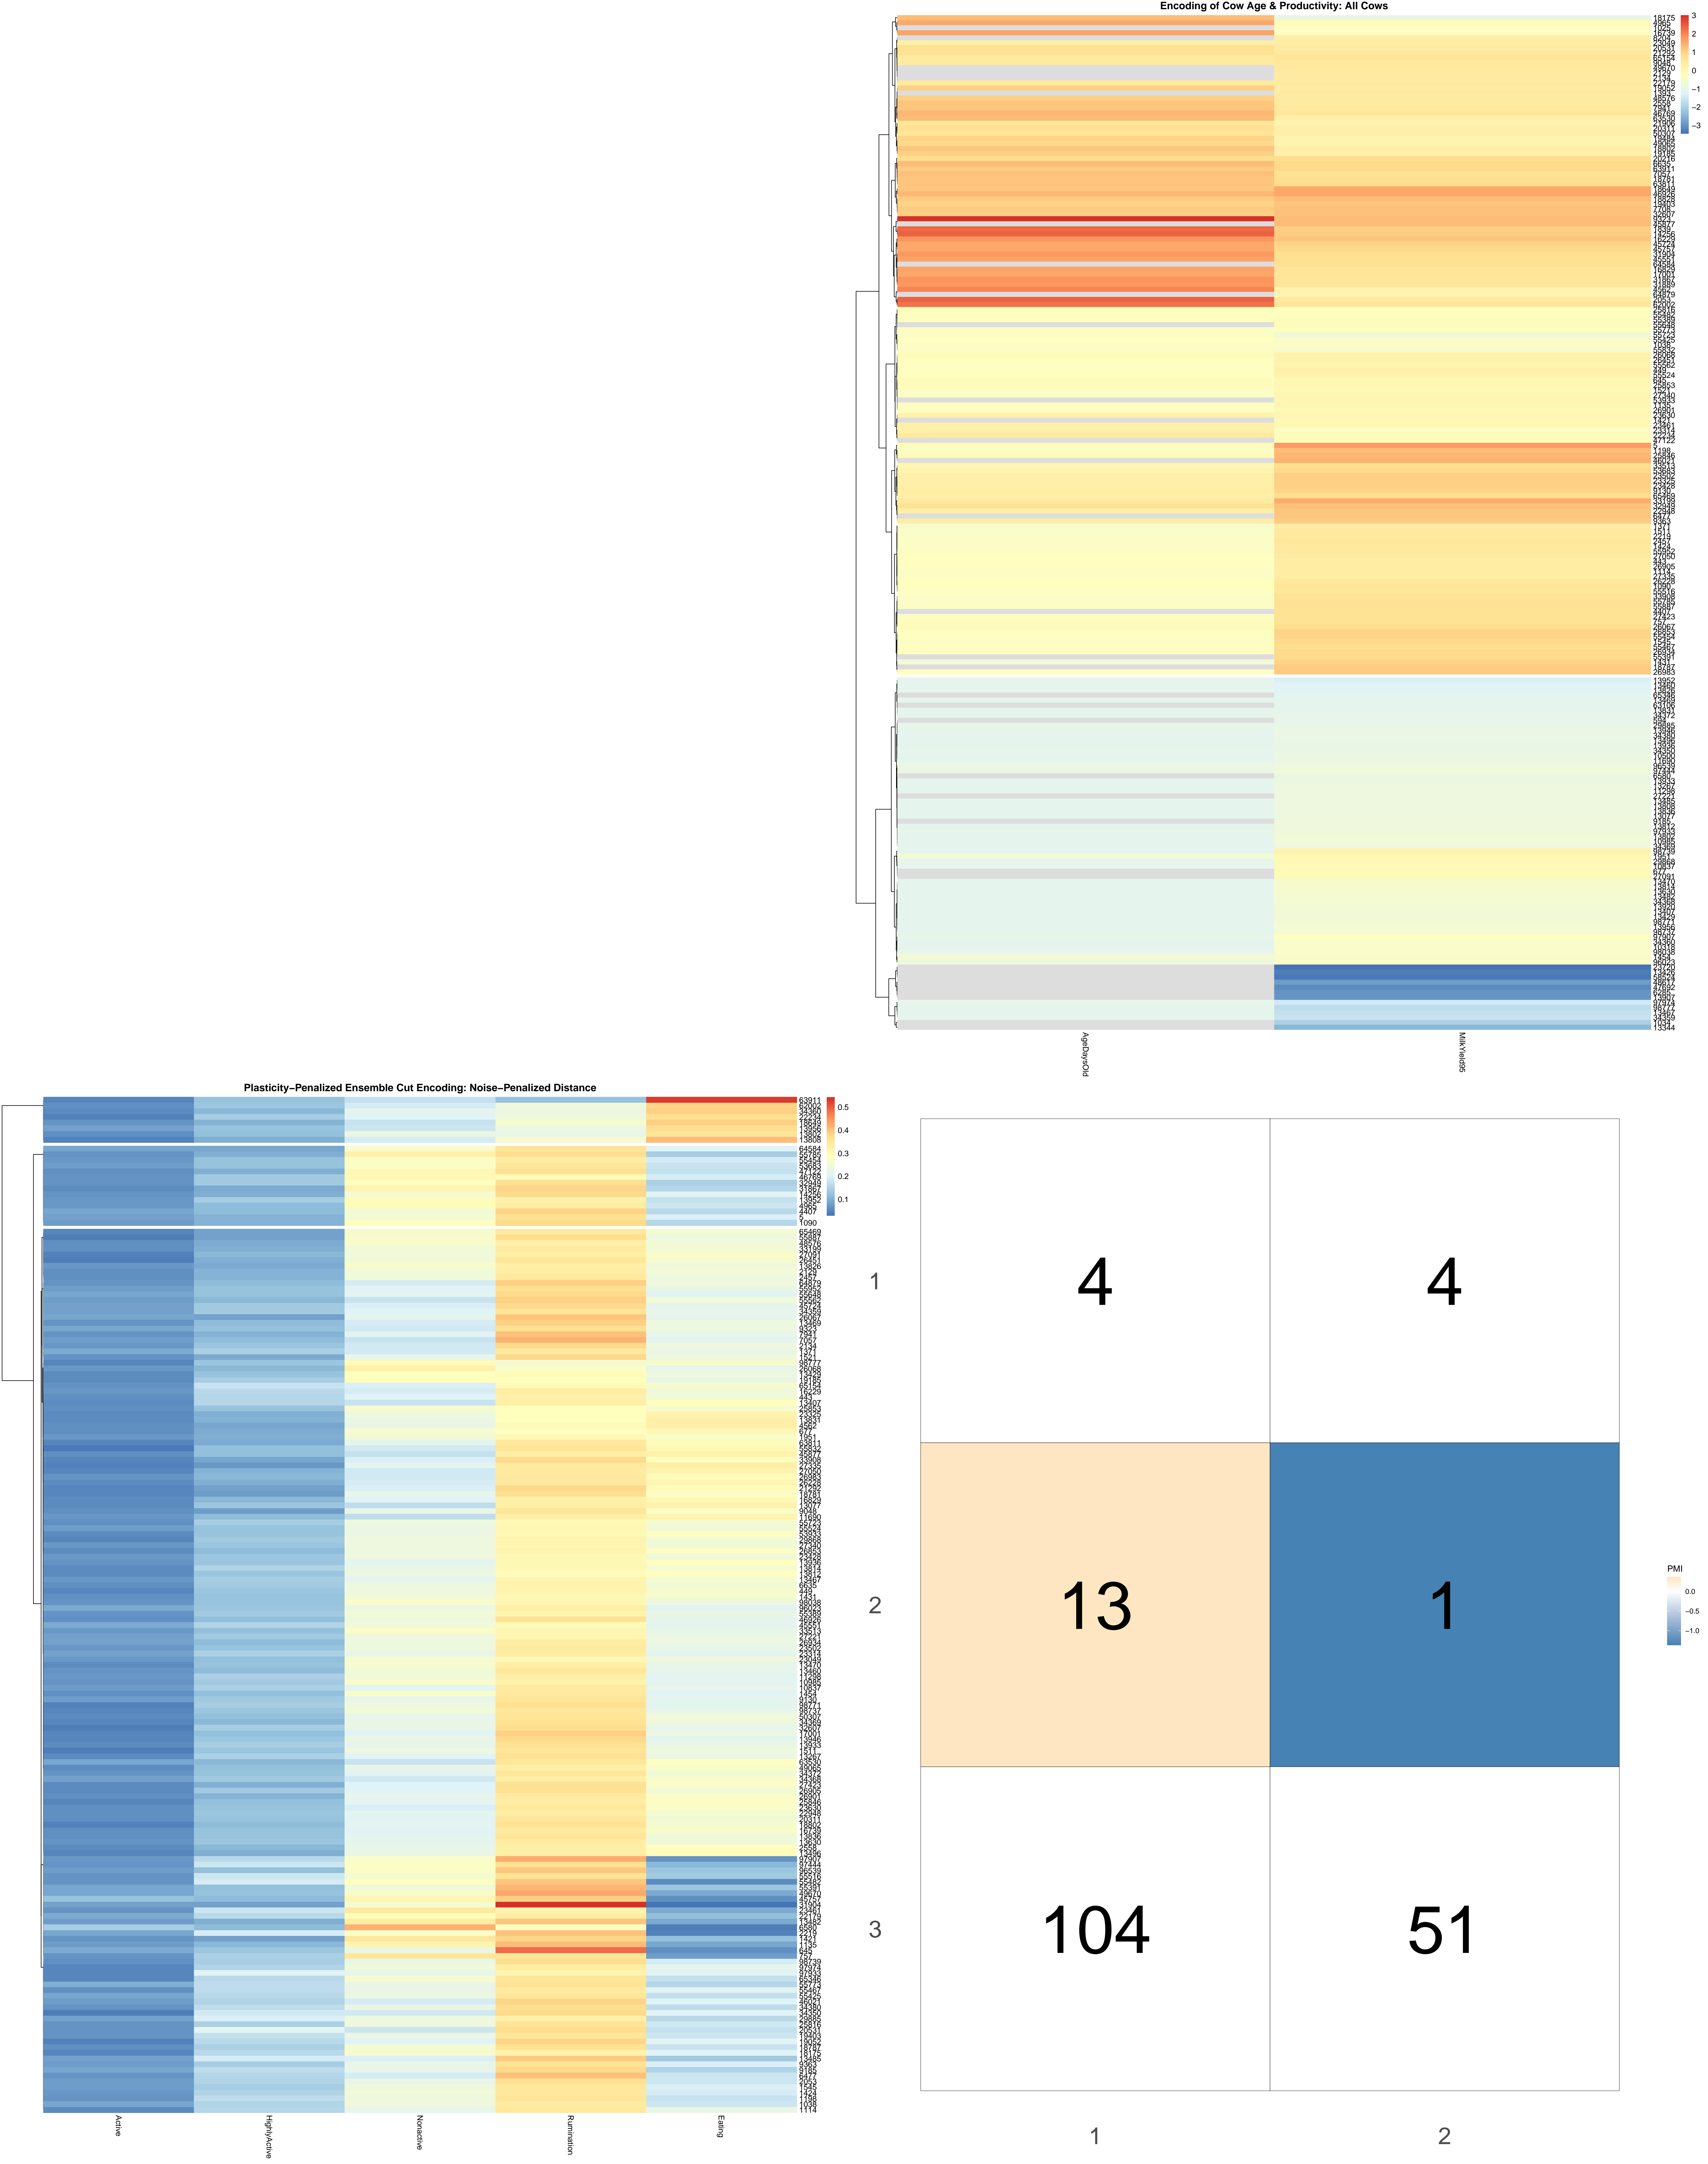

Supplement: s1 [file s1]

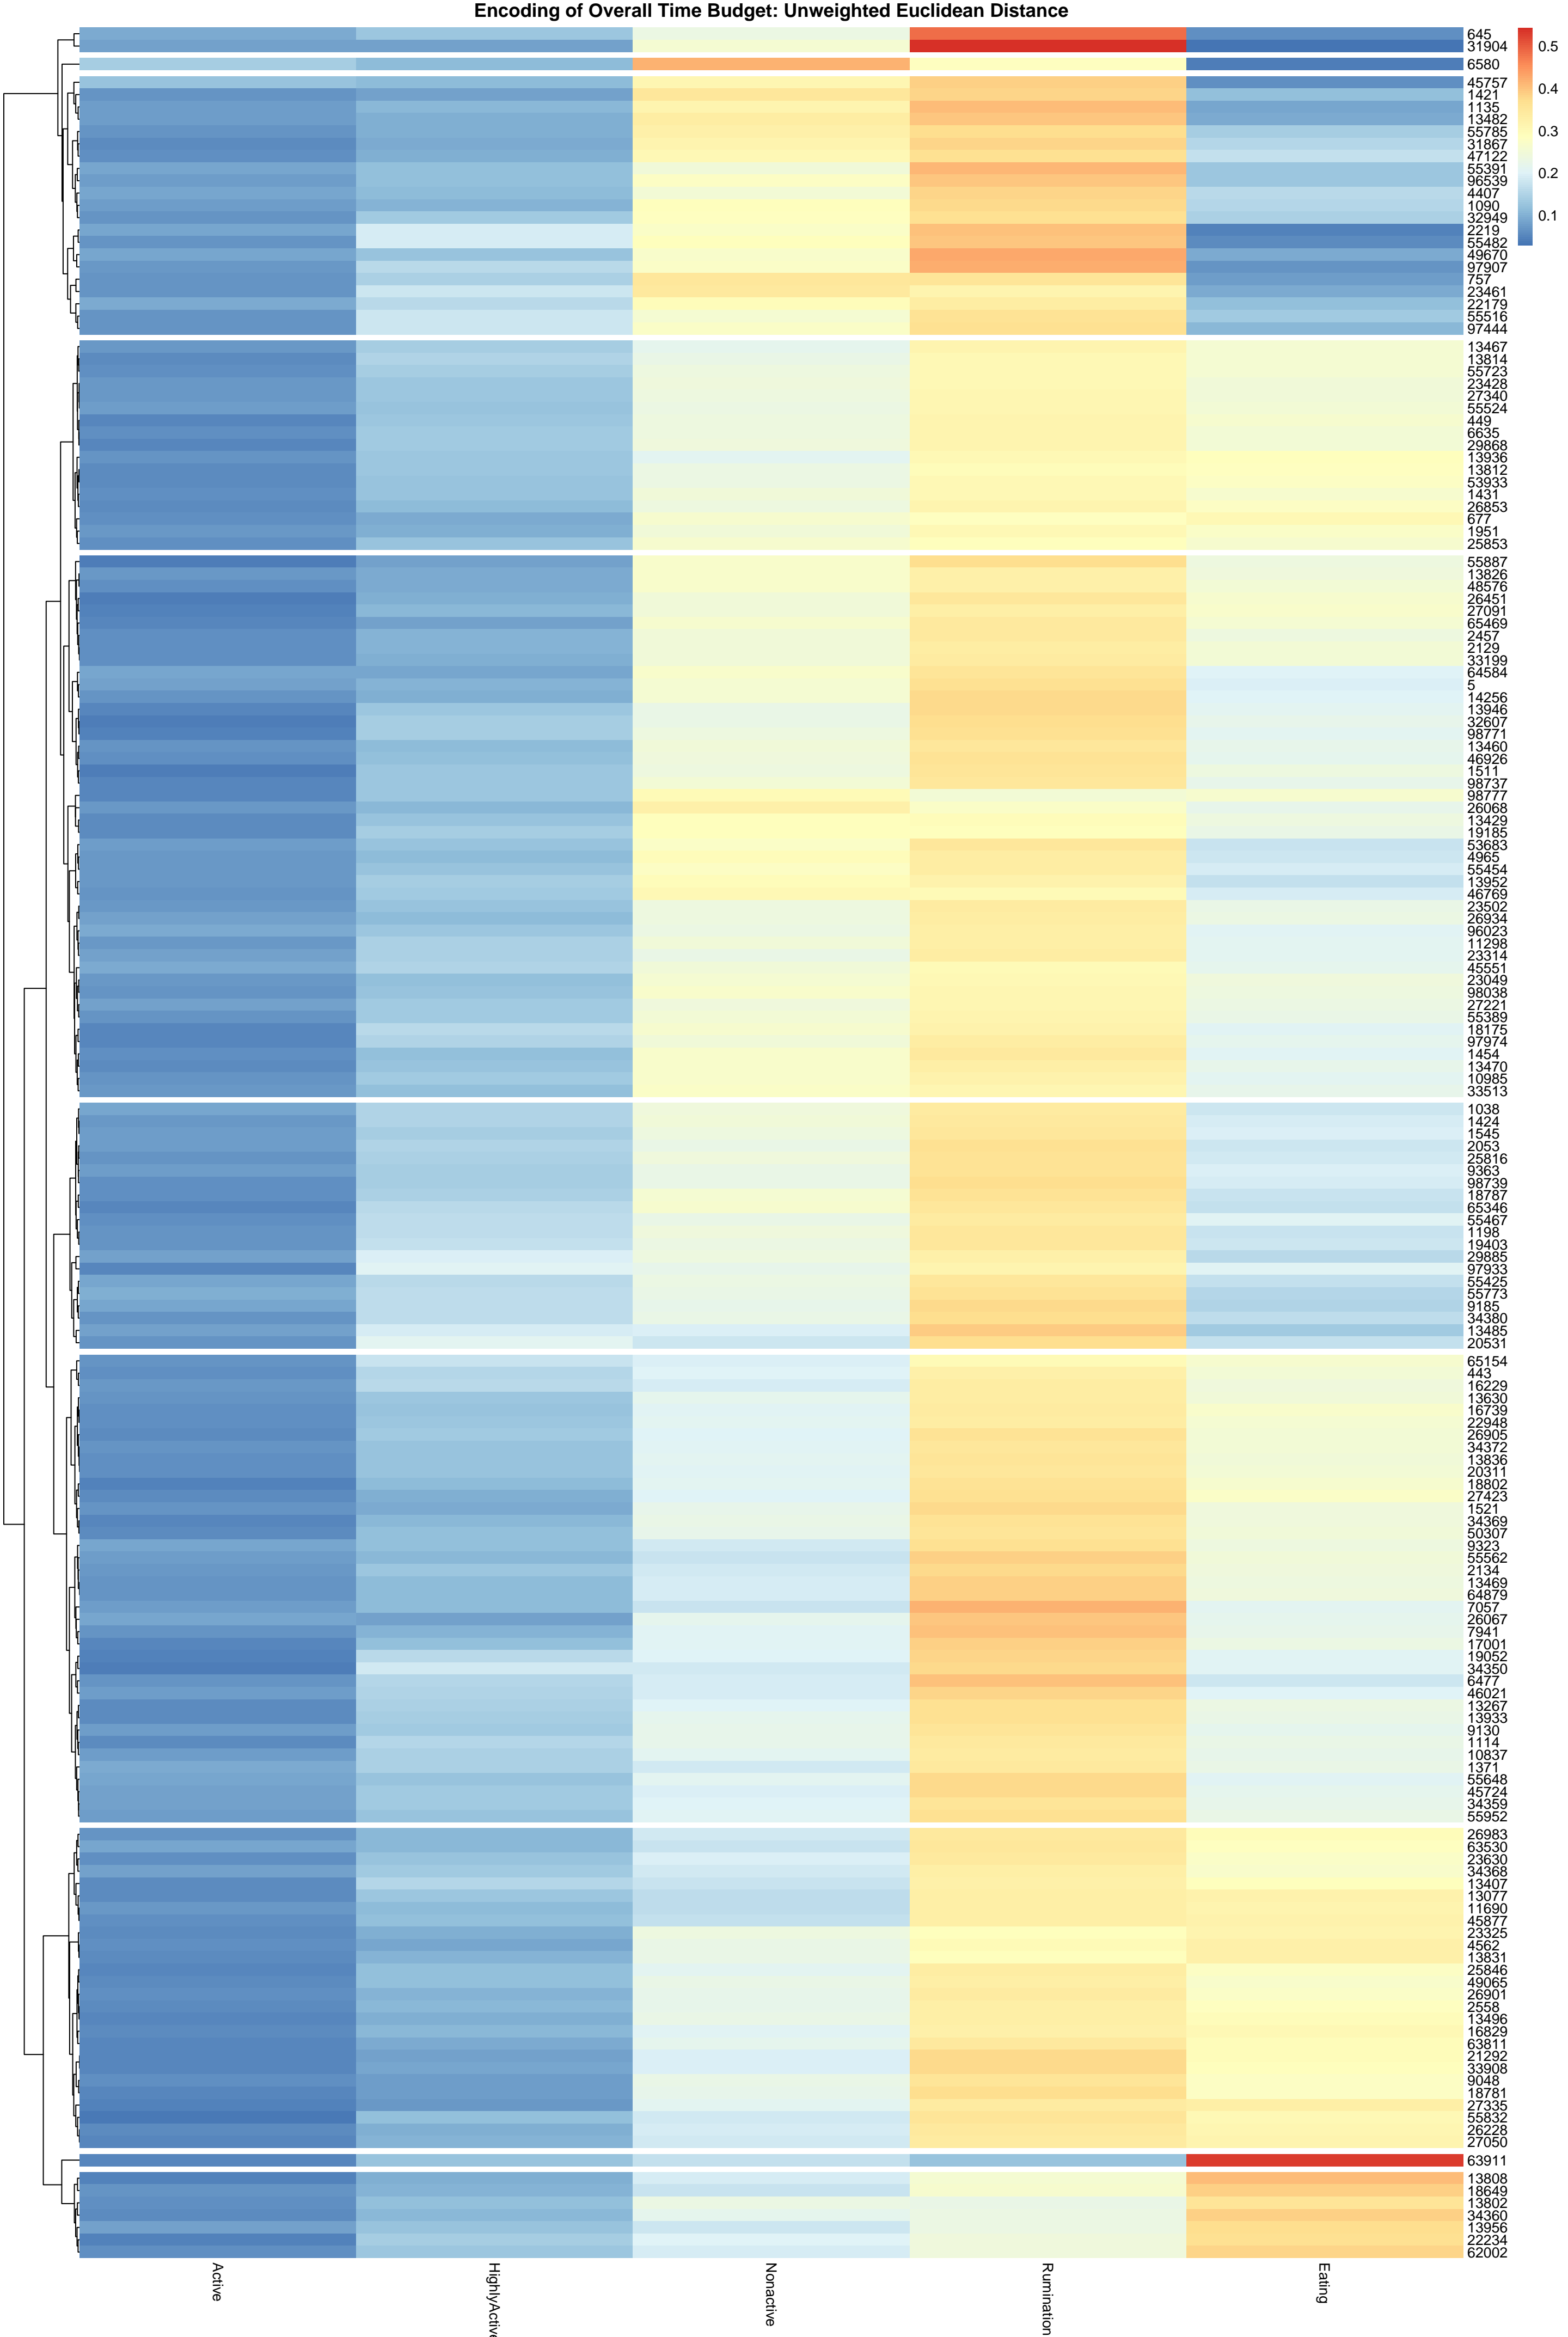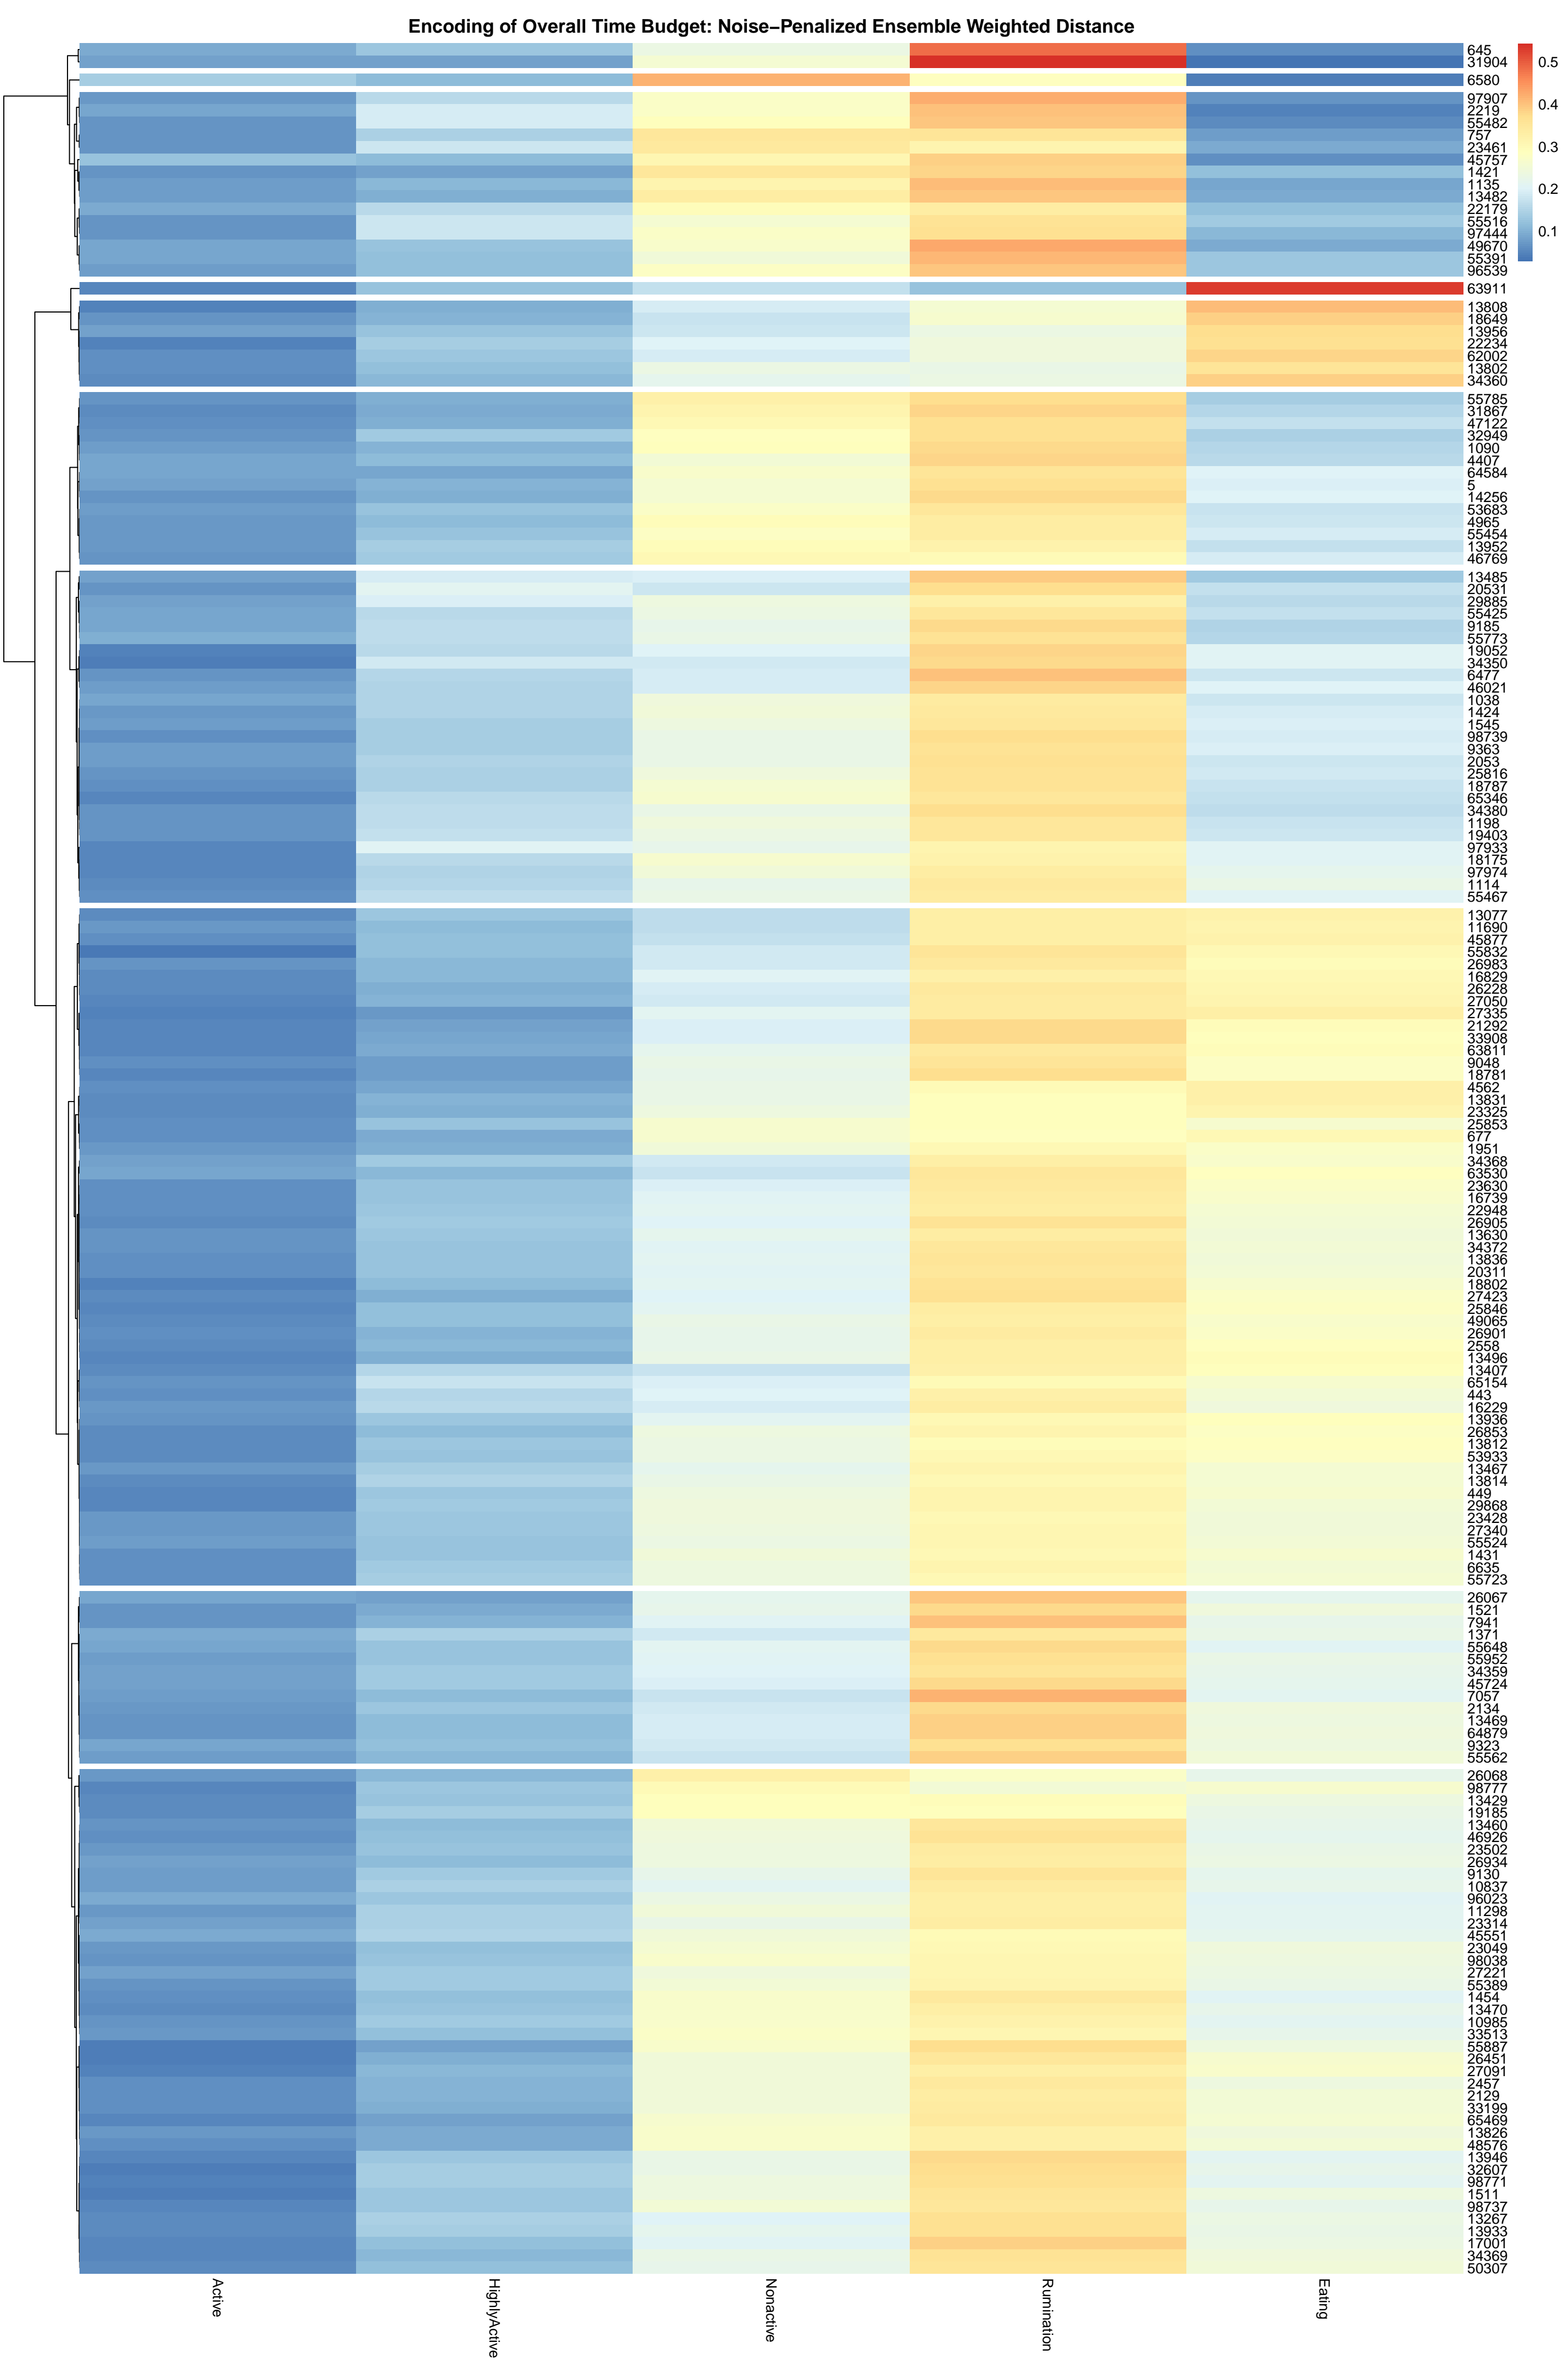

|    | 1 | 2 | 3  | 4  | 5  | 6  | 7  | 8  | 9 | 10 |
|----|---|---|----|----|----|----|----|----|---|----|
| 1  | 2 | 0 | 0  | 0  | 0  | 0  | 0  | 0  | 0 | 0  |
| 2  | 0 | 1 | 0  | 0  | 0  | 0  | 0  | 0  | 0 | 0  |
| 3  | 0 | 0 | 15 | 0  | 0  | 0  | 0  | 0  | 0 | 0  |
| 4  | 0 | 0 | 0  | 0  | 0  | 0  | 0  | 0  | 1 | 0  |
| 5  | 0 | 0 | 0  | 0  | 0  | 0  | 0  | 0  | 0 | 7  |
| 6  | 0 | 0 | 6  | 0  | 8  | 0  | 0  | 0  | 0 | 0  |
| 7  | 0 | 0 | 0  | 0  | 2  | 20 | 5  | 0  | 0 | 0  |
| 8  | 0 | 0 | 0  | 17 | 0  | 0  | 12 | 26 | 0 | 0  |
| 9  | 0 | 0 | 0  | 0  | 0  | 0  | 14 | 0  | 0 | 0  |
| 10 | 0 | 0 | 0  | 0  | 34 | 0  | 7  | 0  | 0 | 0  |

Supplement: s1 [file s1]

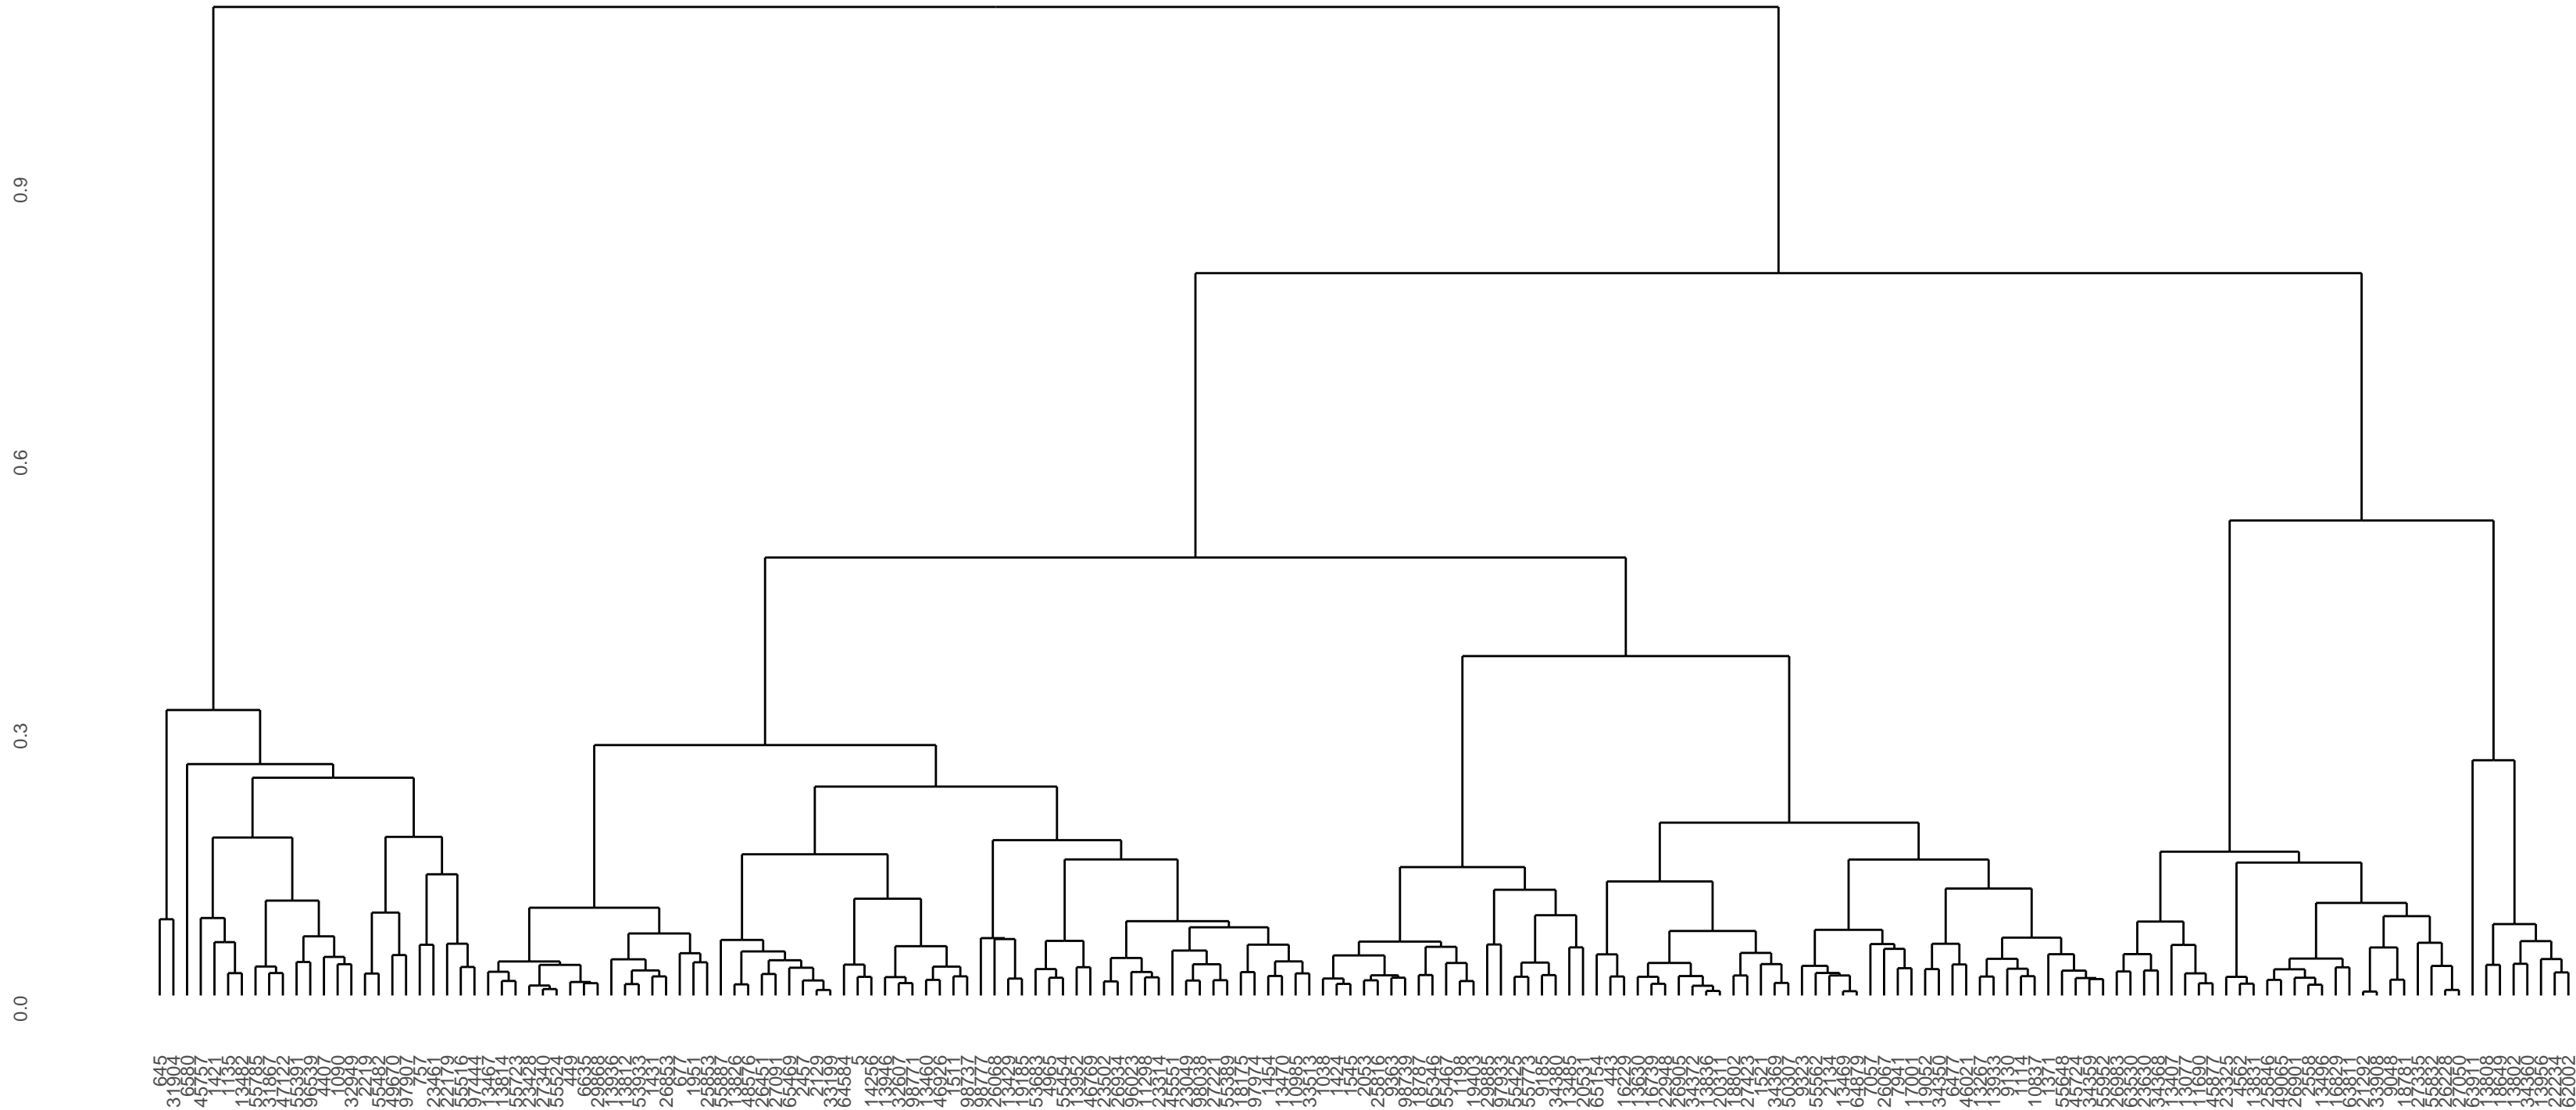

Supplement: s1 [file s1]

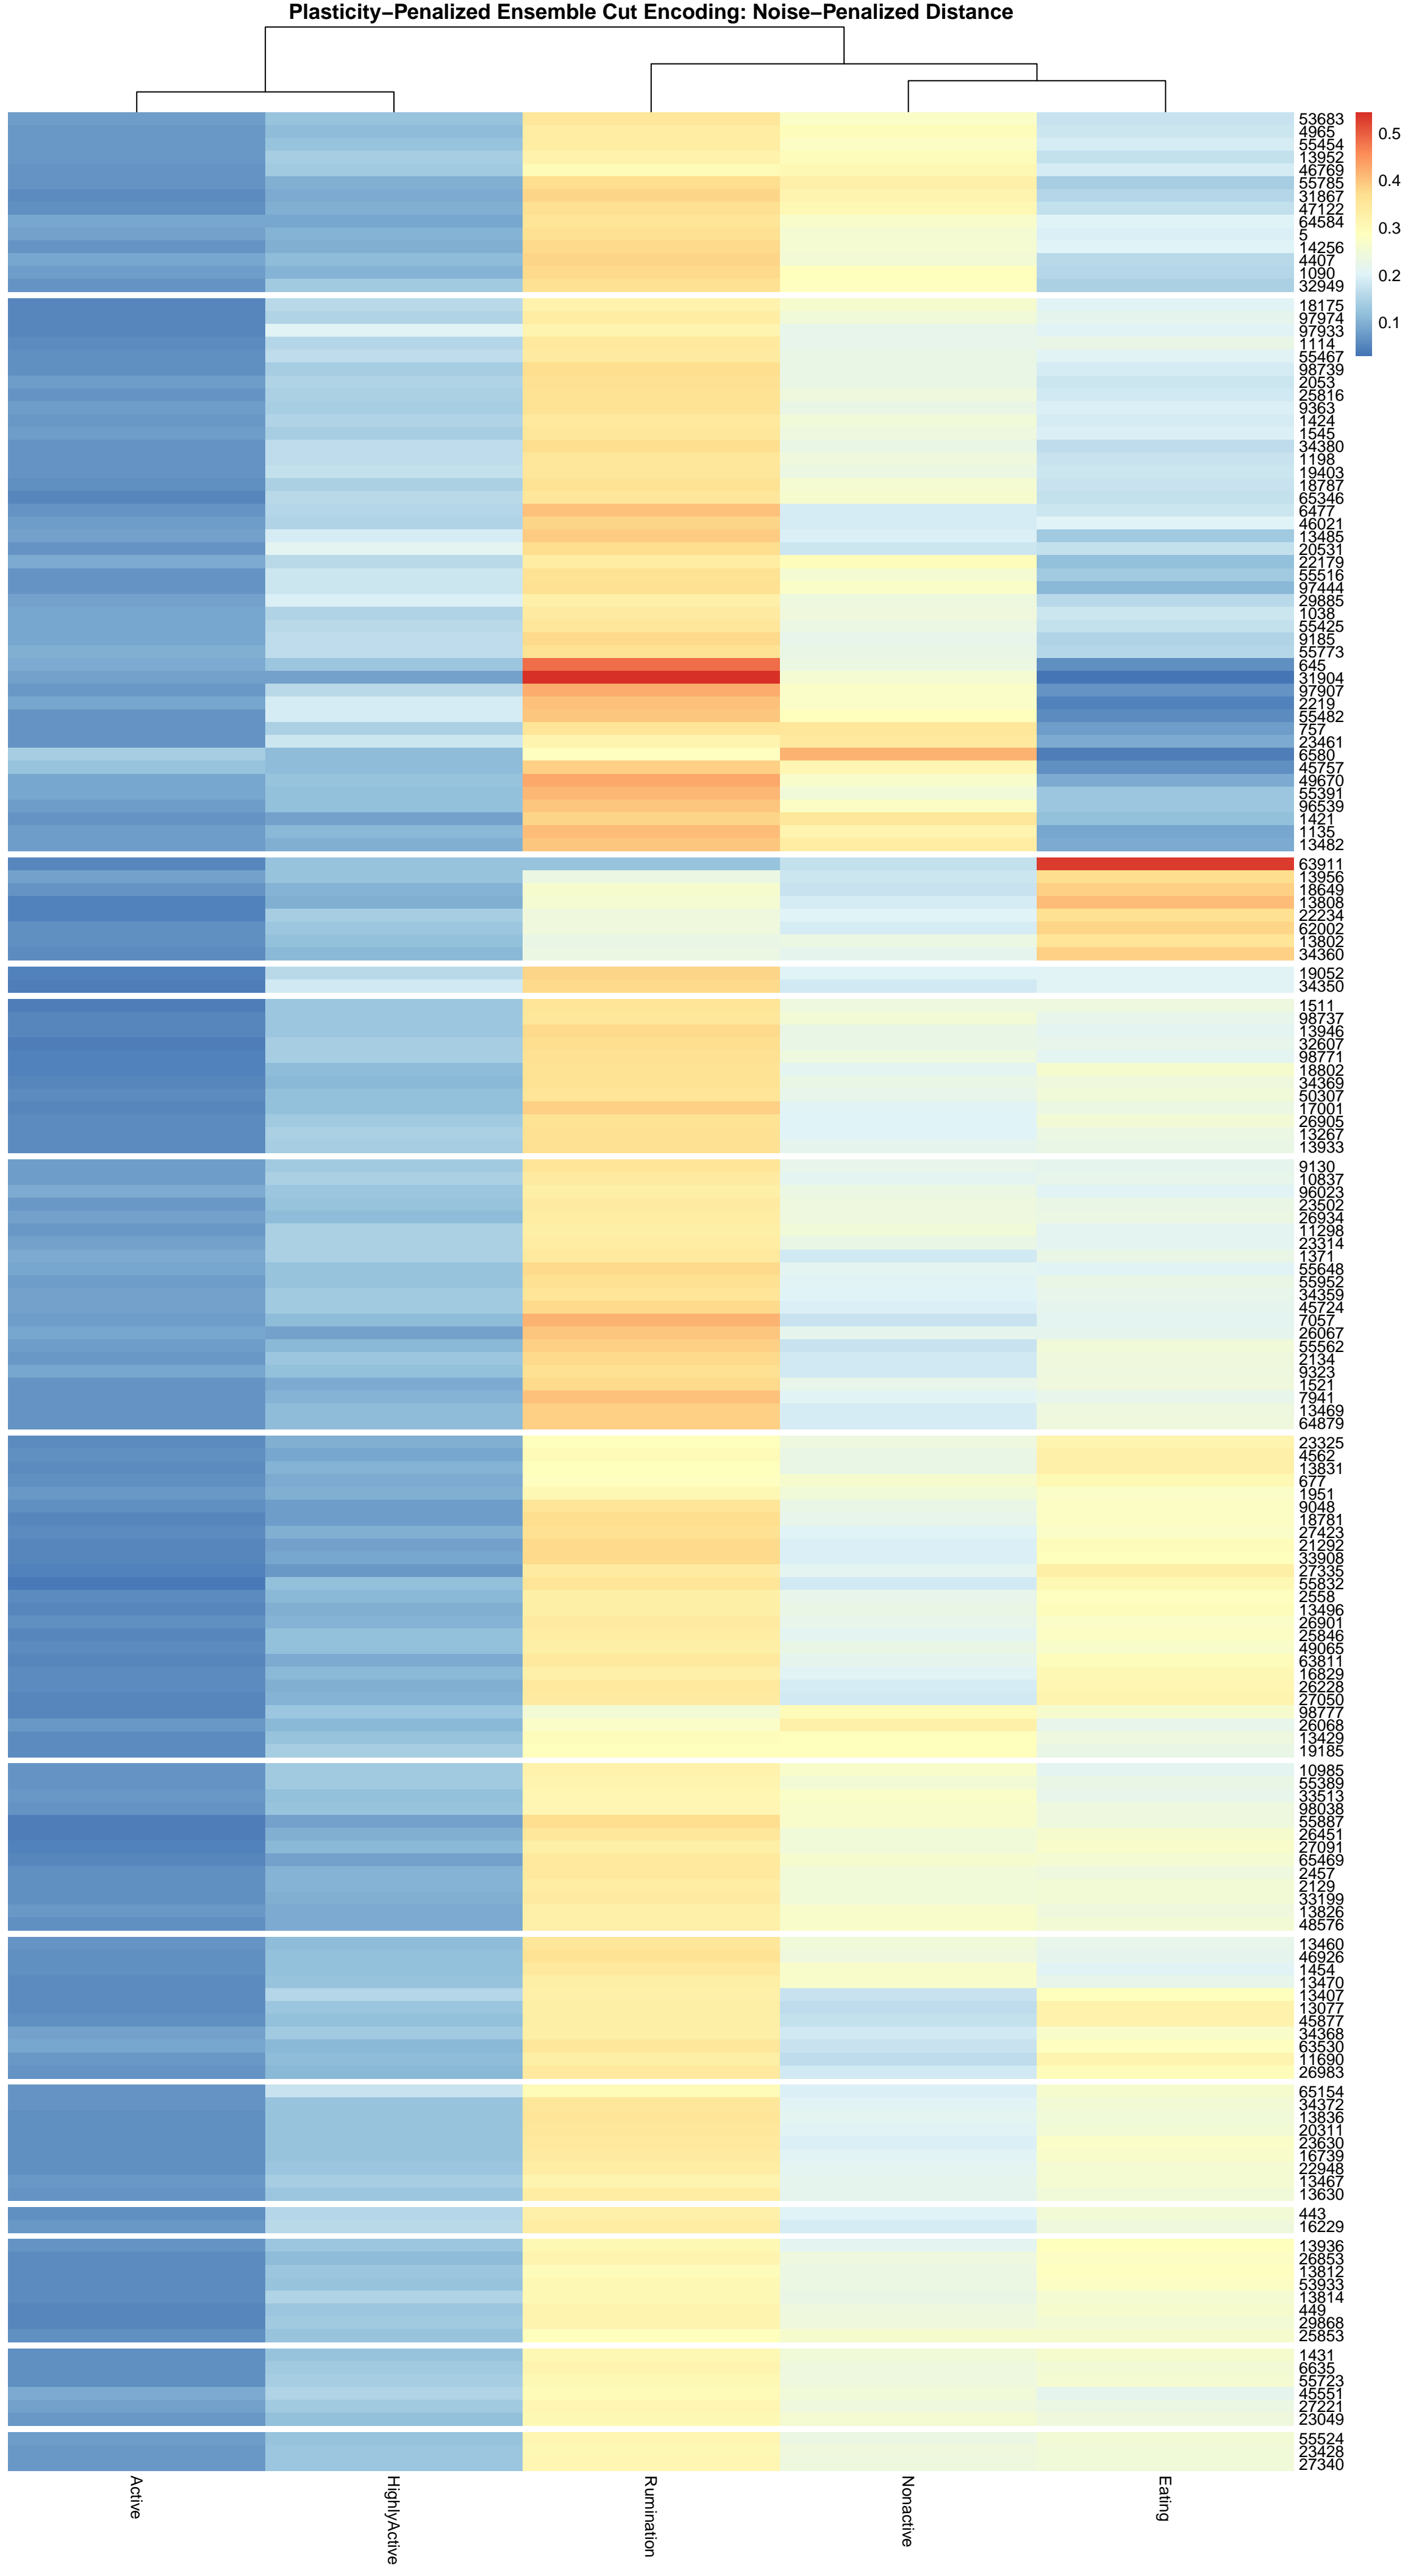

Supplement: s1 [file s1]

Noise-Penalized Ensemble Cut Encoding: Euclidean Distance

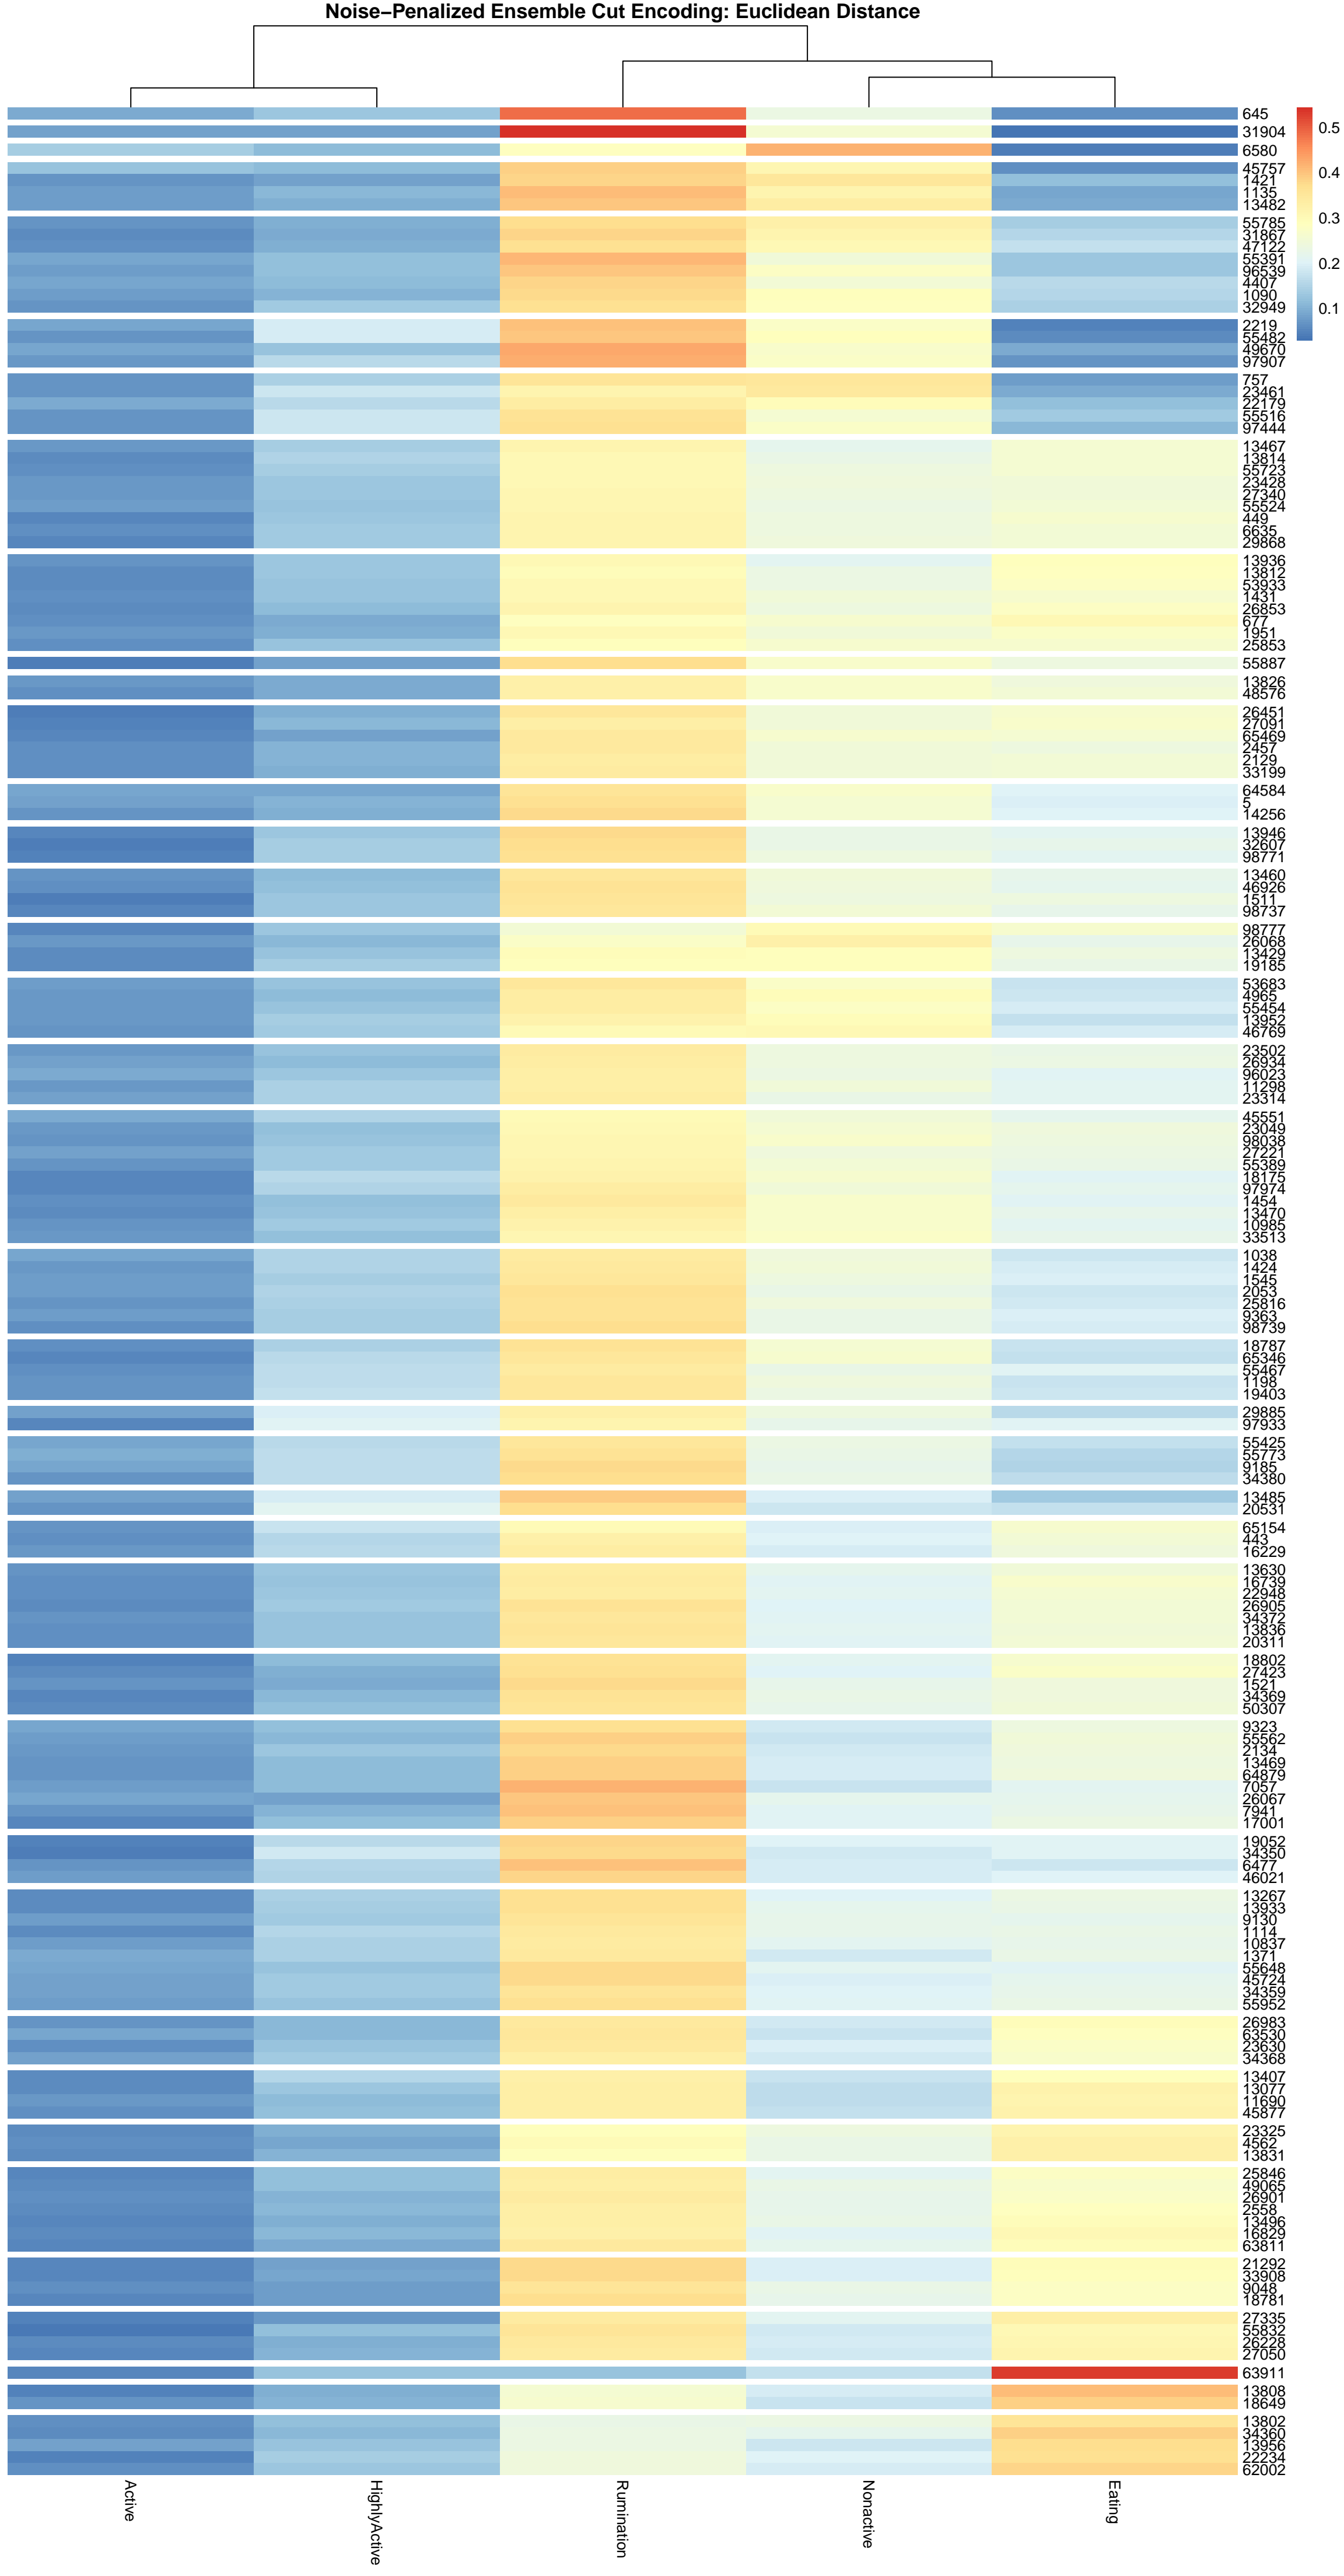

Supplement: s1 [file s1]

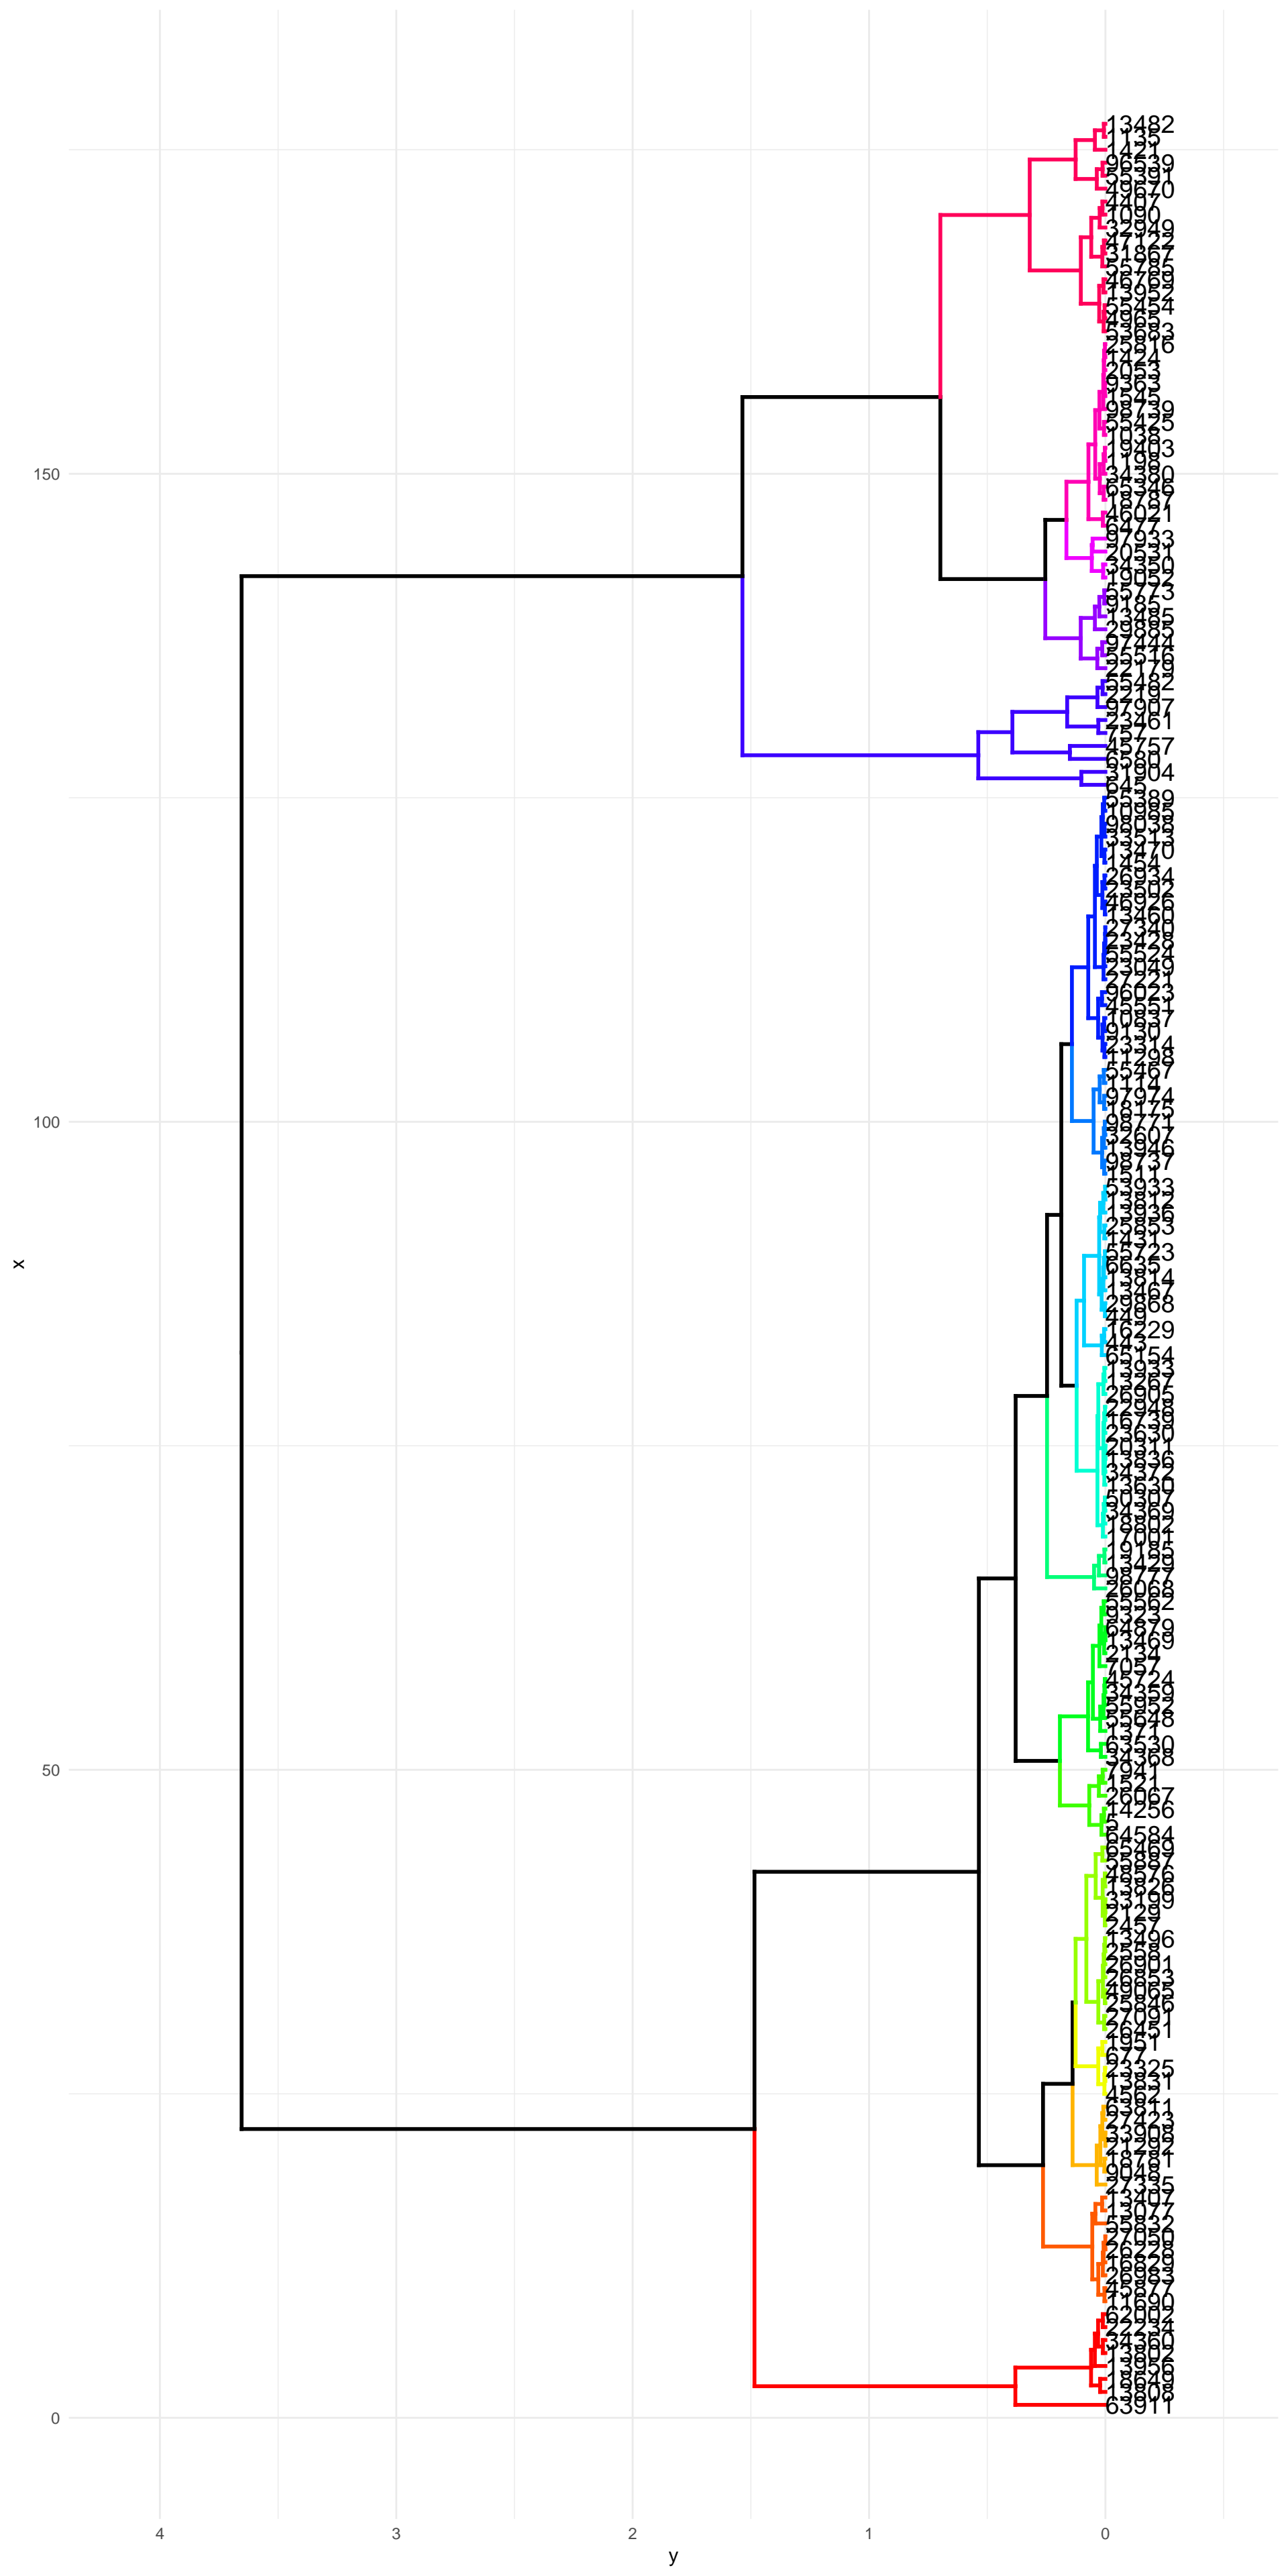

Supplement: s1 [file s1]

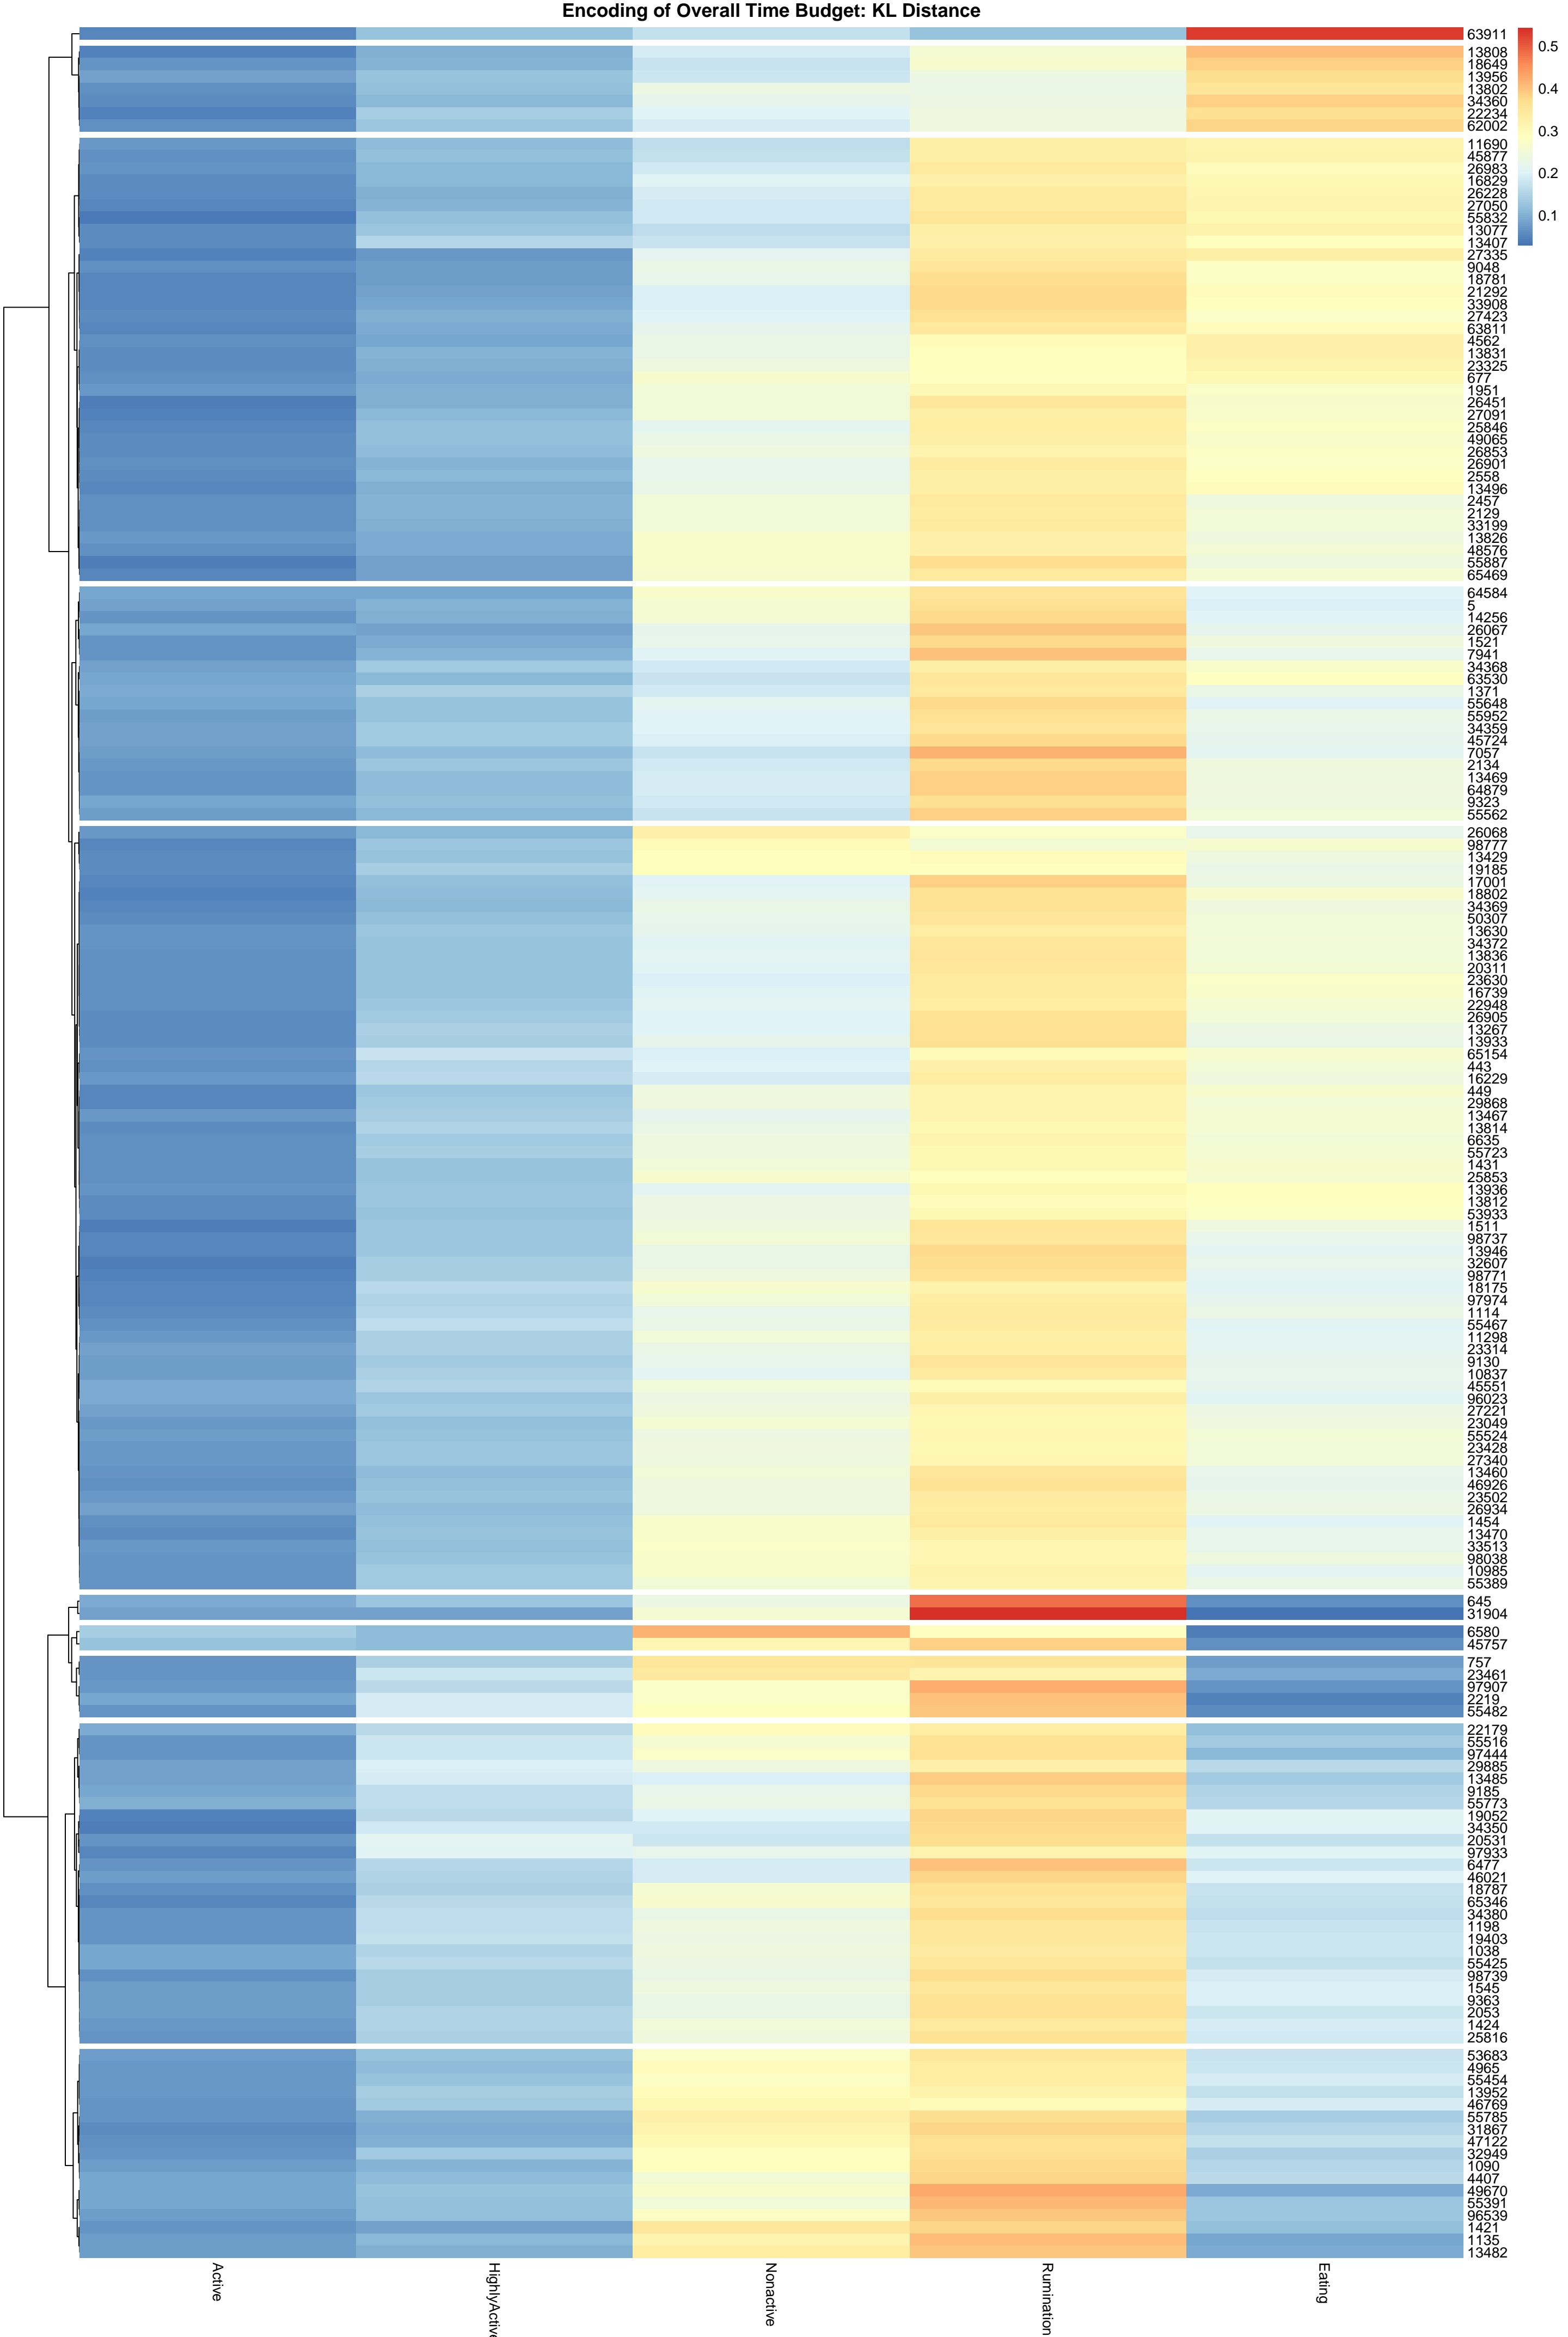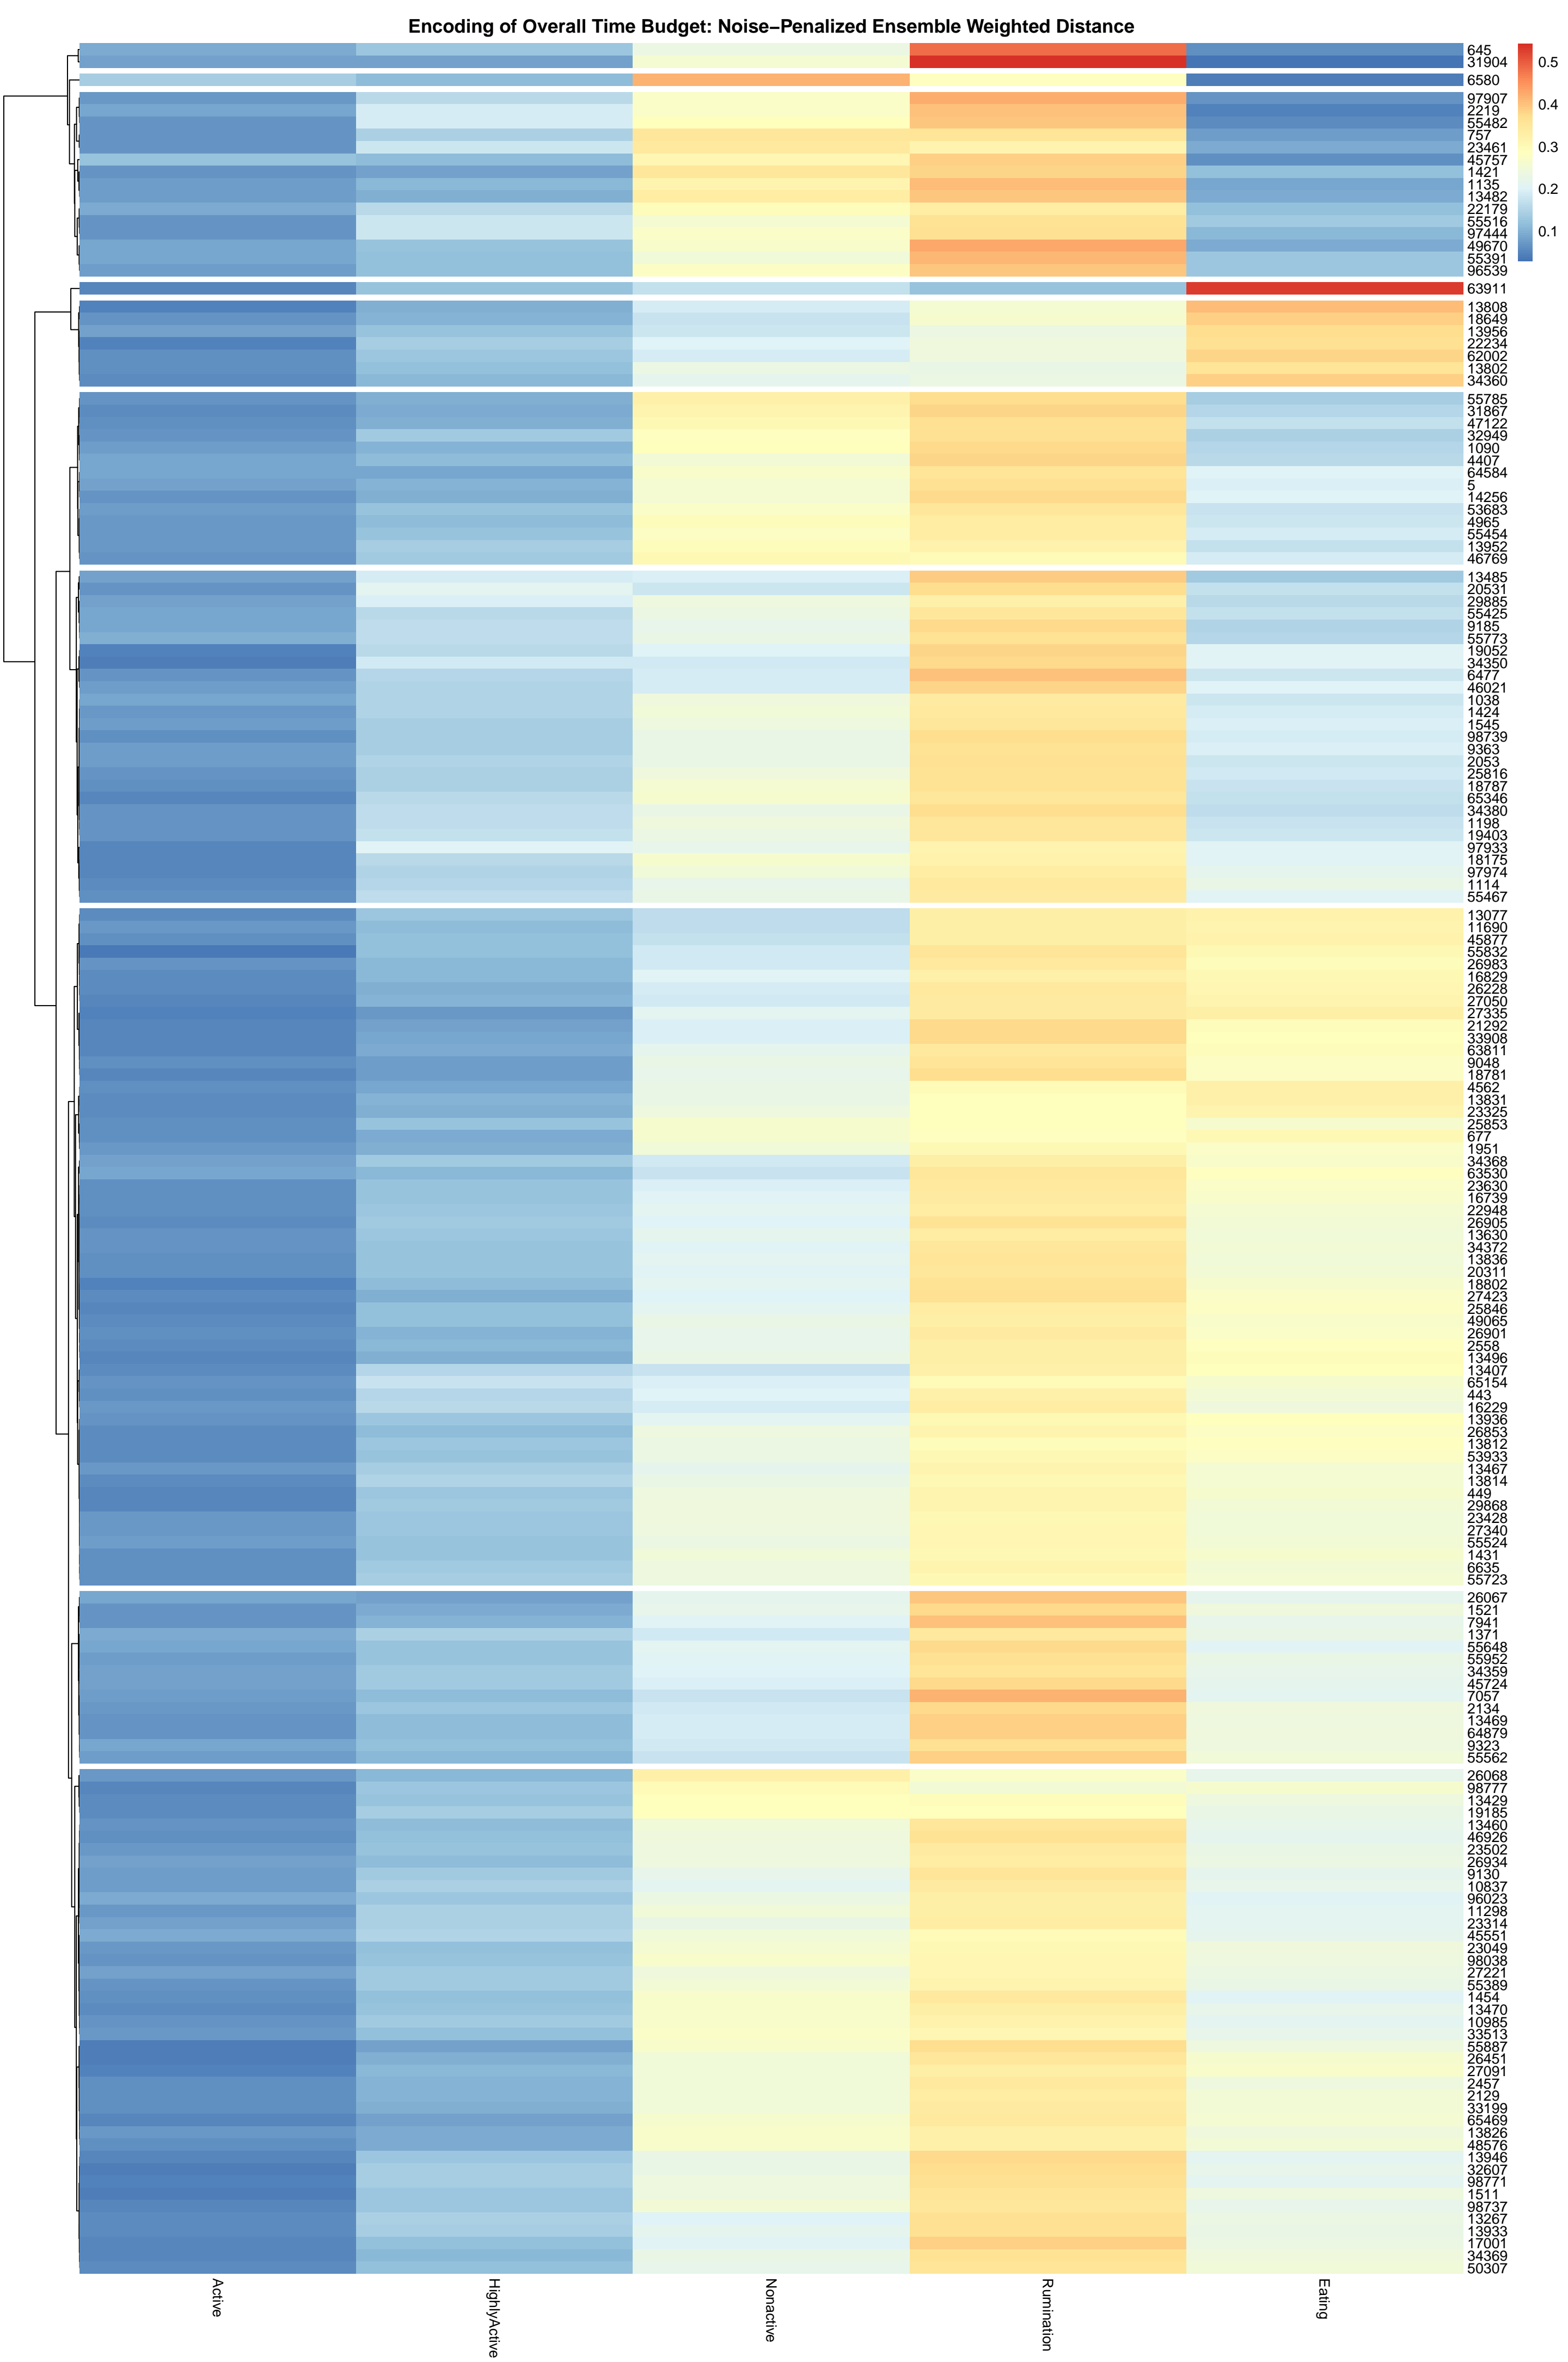

|    | 1 | 2 | 3  | 4  | 5  | 6 | 7 | 8 | 9  | 10 |
|----|---|---|----|----|----|---|---|---|----|----|
| 1  | 0 | 0 | 0  | 0  | 0  | 2 | 0 | 0 | 0  | 0  |
| 2  | 0 | 0 | 0  | 0  | 0  | 0 | 1 | 0 | 0  | 0  |
| 3  | 0 | 0 | 0  | 0  | 0  | 0 | 1 | 5 | 3  | 6  |
| 4  | 1 | 0 | 0  | 0  | 0  | 0 | 0 | 0 | 0  | 0  |
| 5  | 0 | 7 | 0  | 0  | 0  | 0 | 0 | 0 | 0  | 0  |
| 6  | 0 | 0 | 0  | 3  | 0  | 0 | 0 | 0 | 0  | 11 |
| 7  | 0 | 0 | 0  | 0  | 4  | 0 | 0 | 0 | 23 | 0  |
| 8  | 0 | 0 | 27 | 2  | 26 | 0 | 0 | 0 | 0  | 0  |
| 9  | 0 | 0 | 0  | 14 | 0  | 0 | 0 | 0 | 0  | 0  |
| 10 | 0 | 0 | 9  | 0  | 32 | 0 | 0 | 0 | 0  | 0  |

Supplement: s1 [file s1]

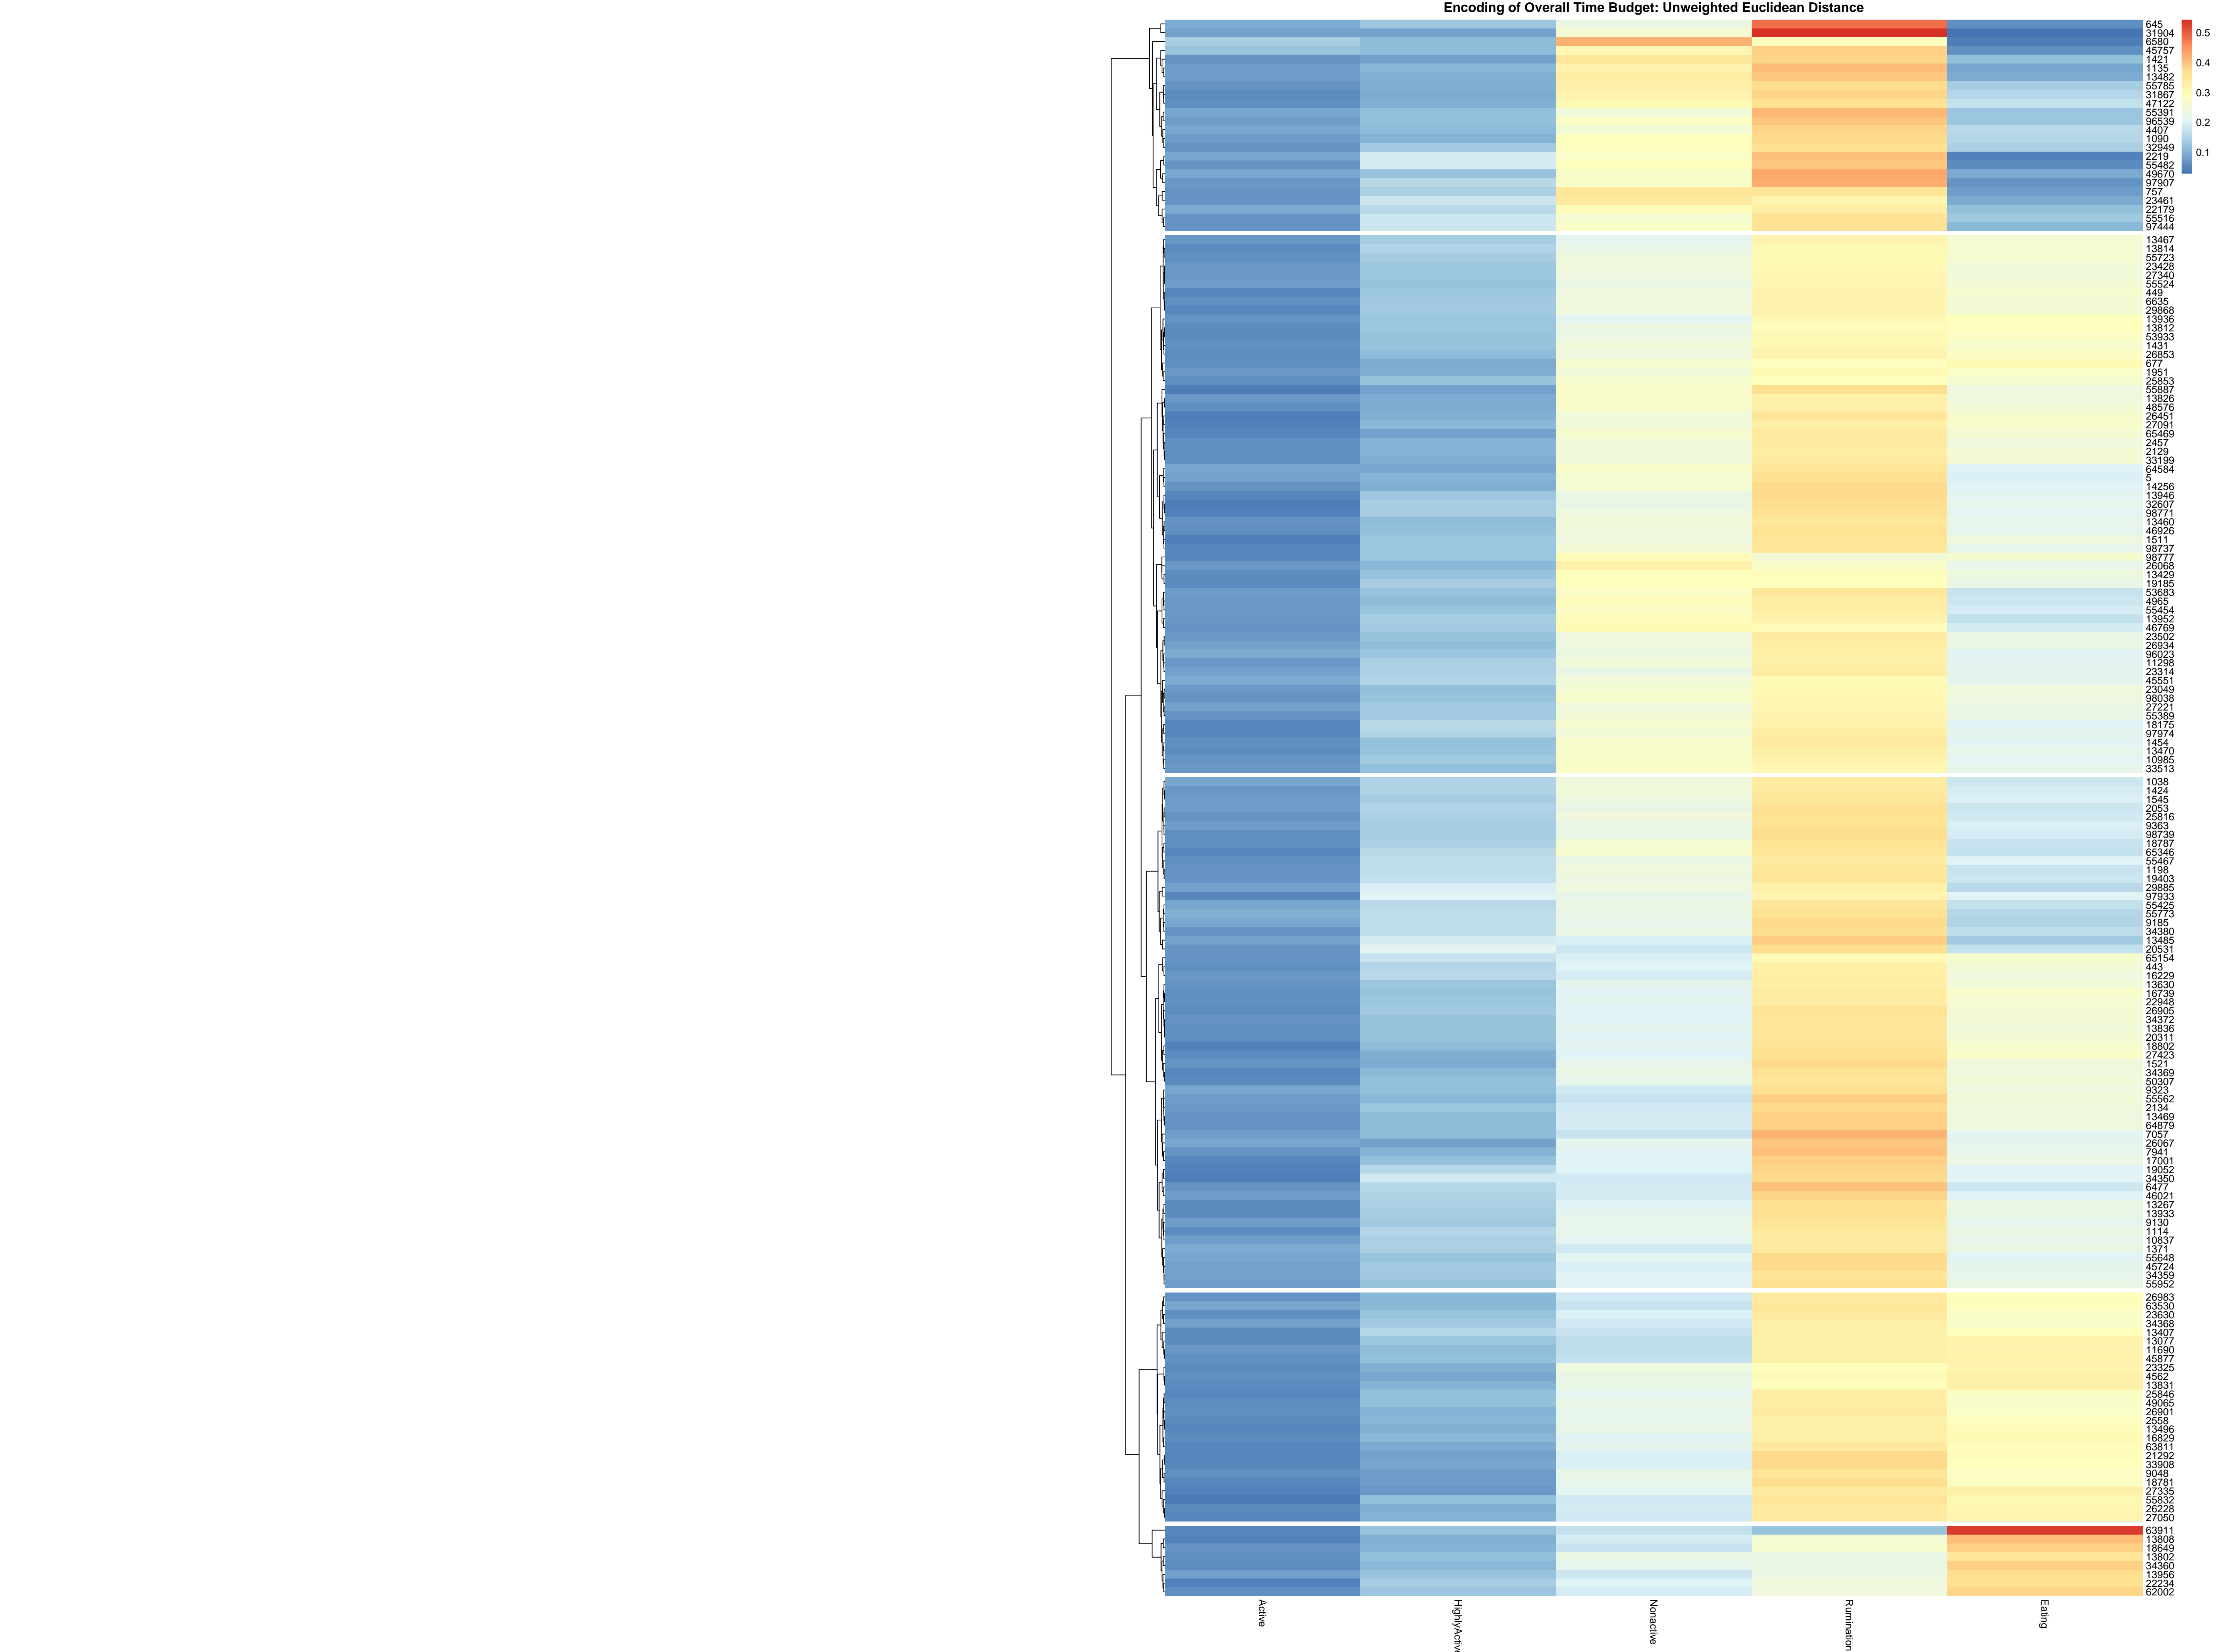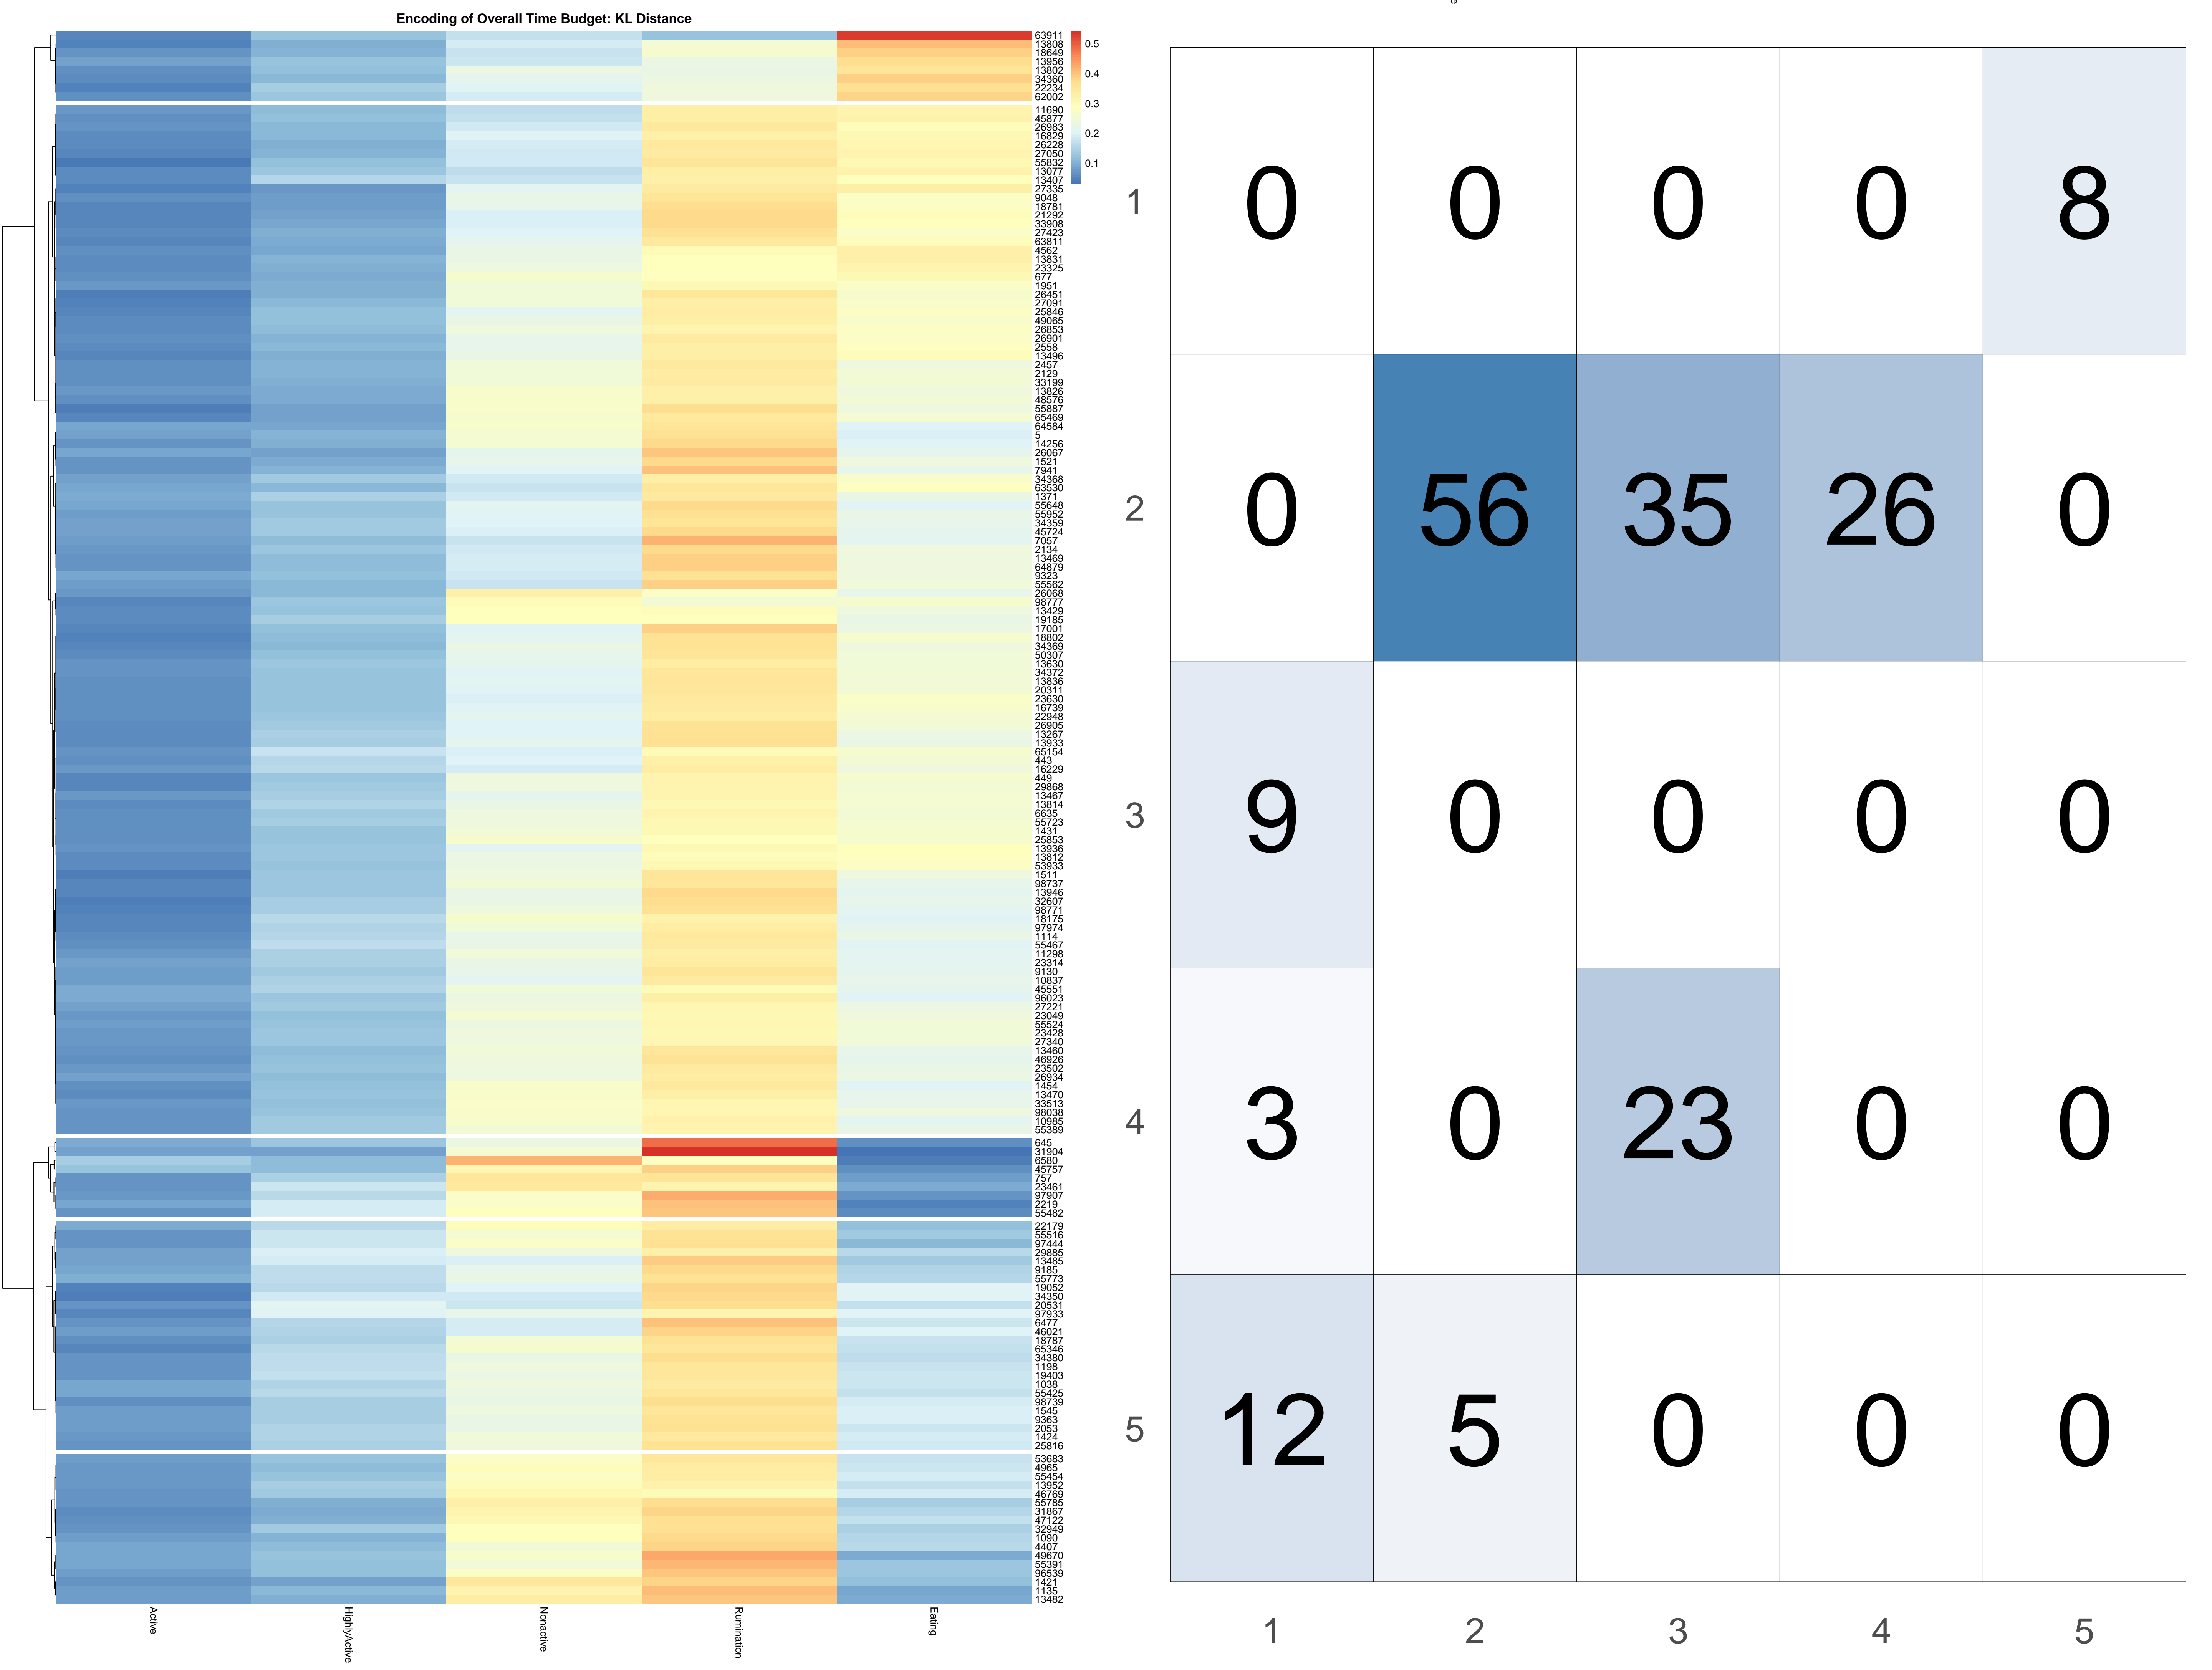

|   | 1  | 2  | 3  | 4  | 5 |
|---|----|----|----|----|---|
| 1 | 0  | 0  | 0  | 0  | 8 |
| 2 | 0  | 56 | 35 | 26 | 0 |
| 3 | 9  | 0  | 0  | 0  | 0 |
| 4 | 3  | 0  | 23 | 0  | 0 |
| 5 | 12 | 5  | 0  | 0  | 0 |

Supplement: s1 [file s1]

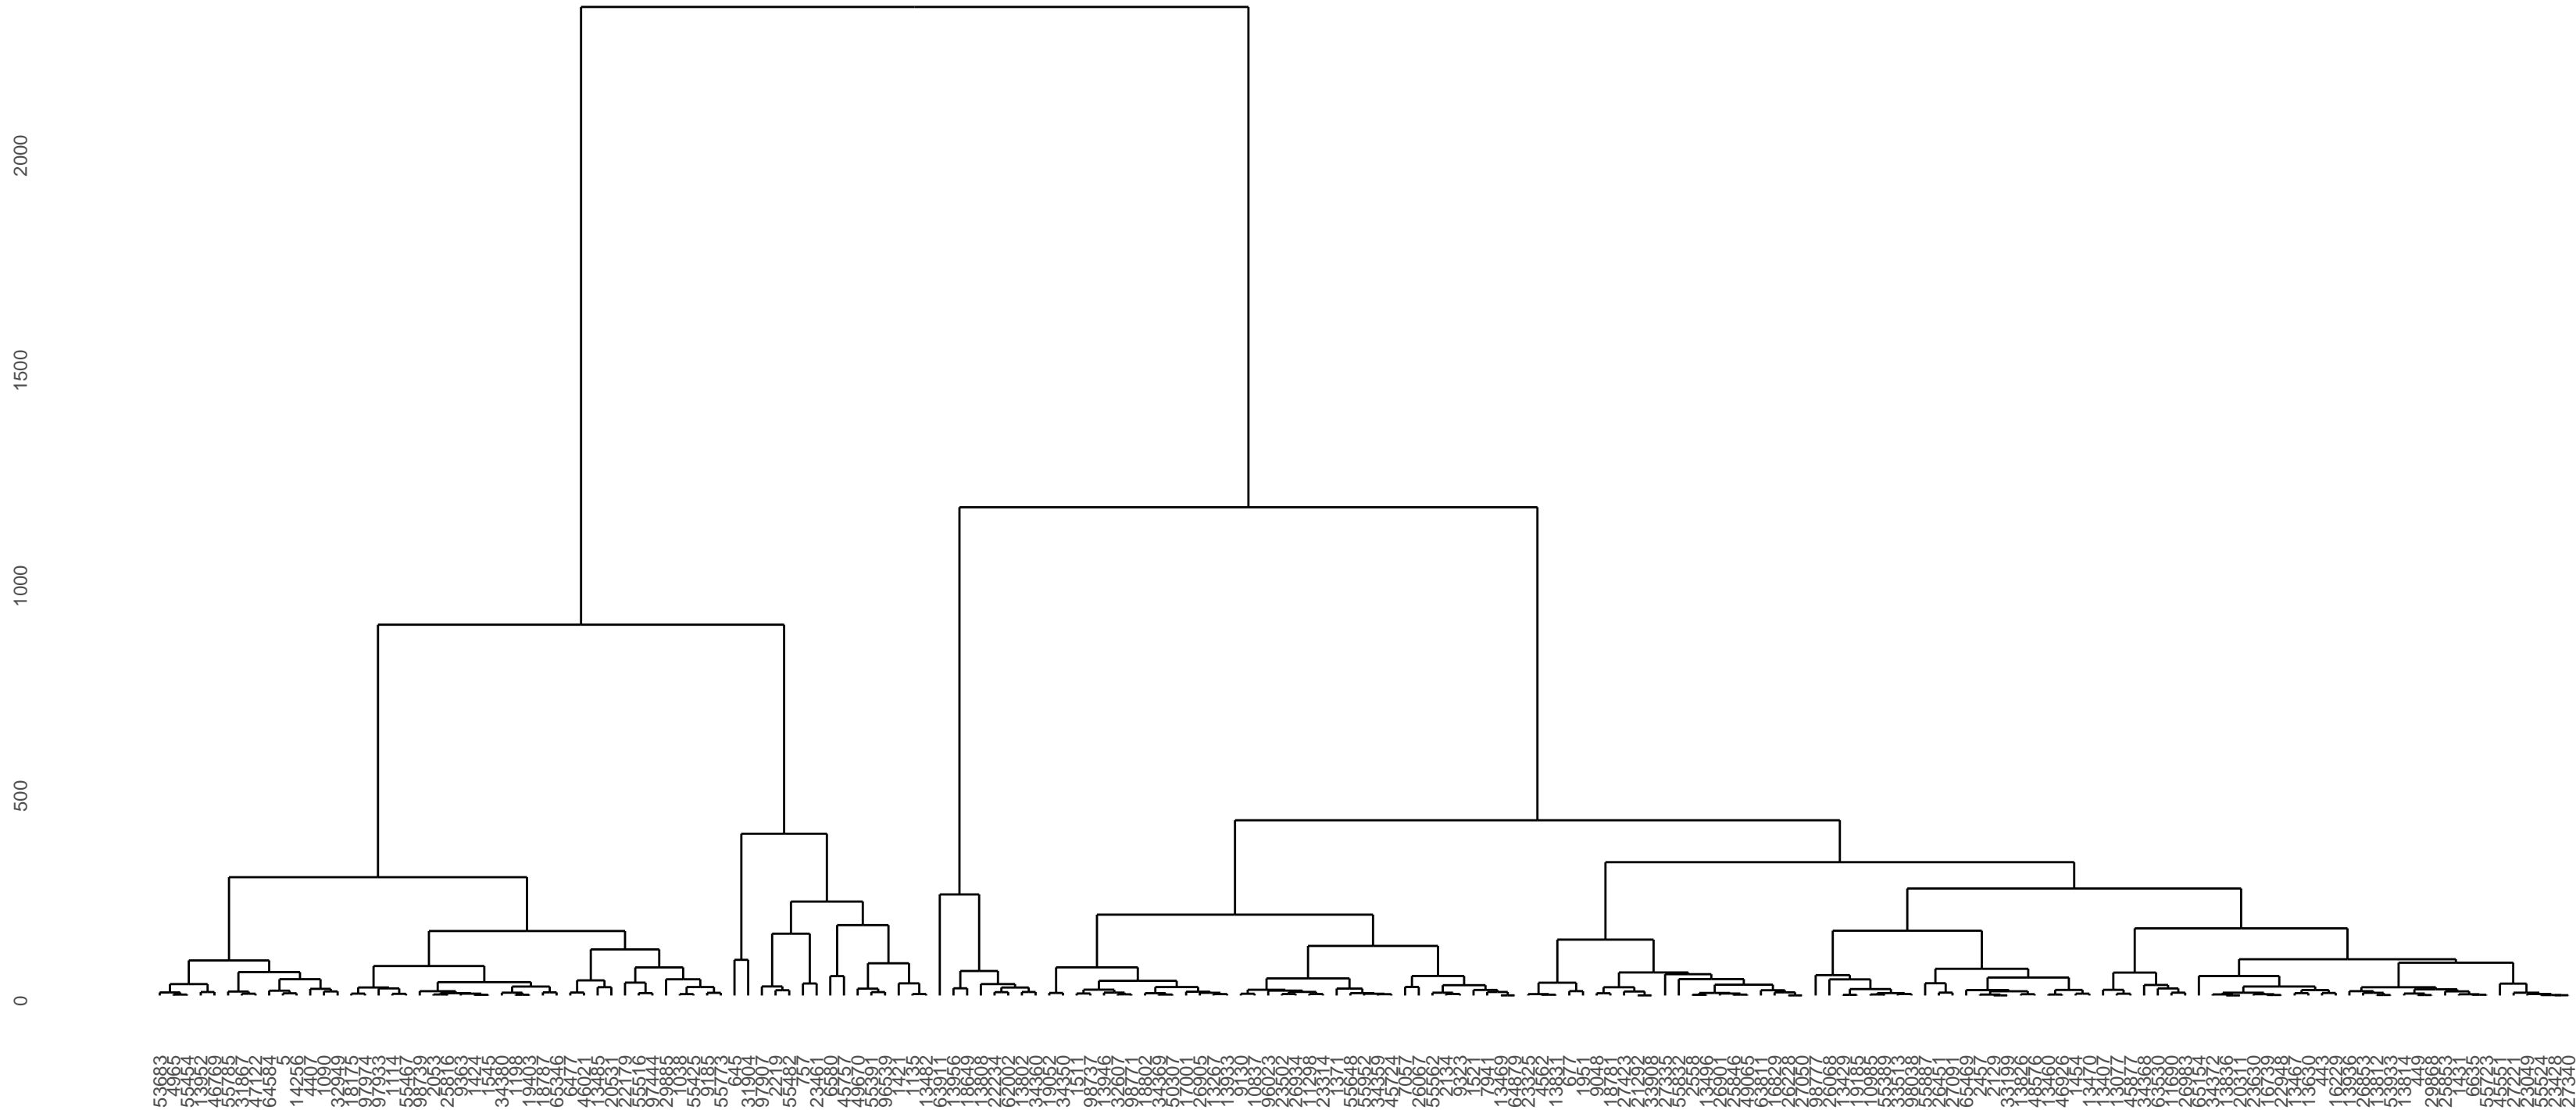

Supplement: s1 [file s1]

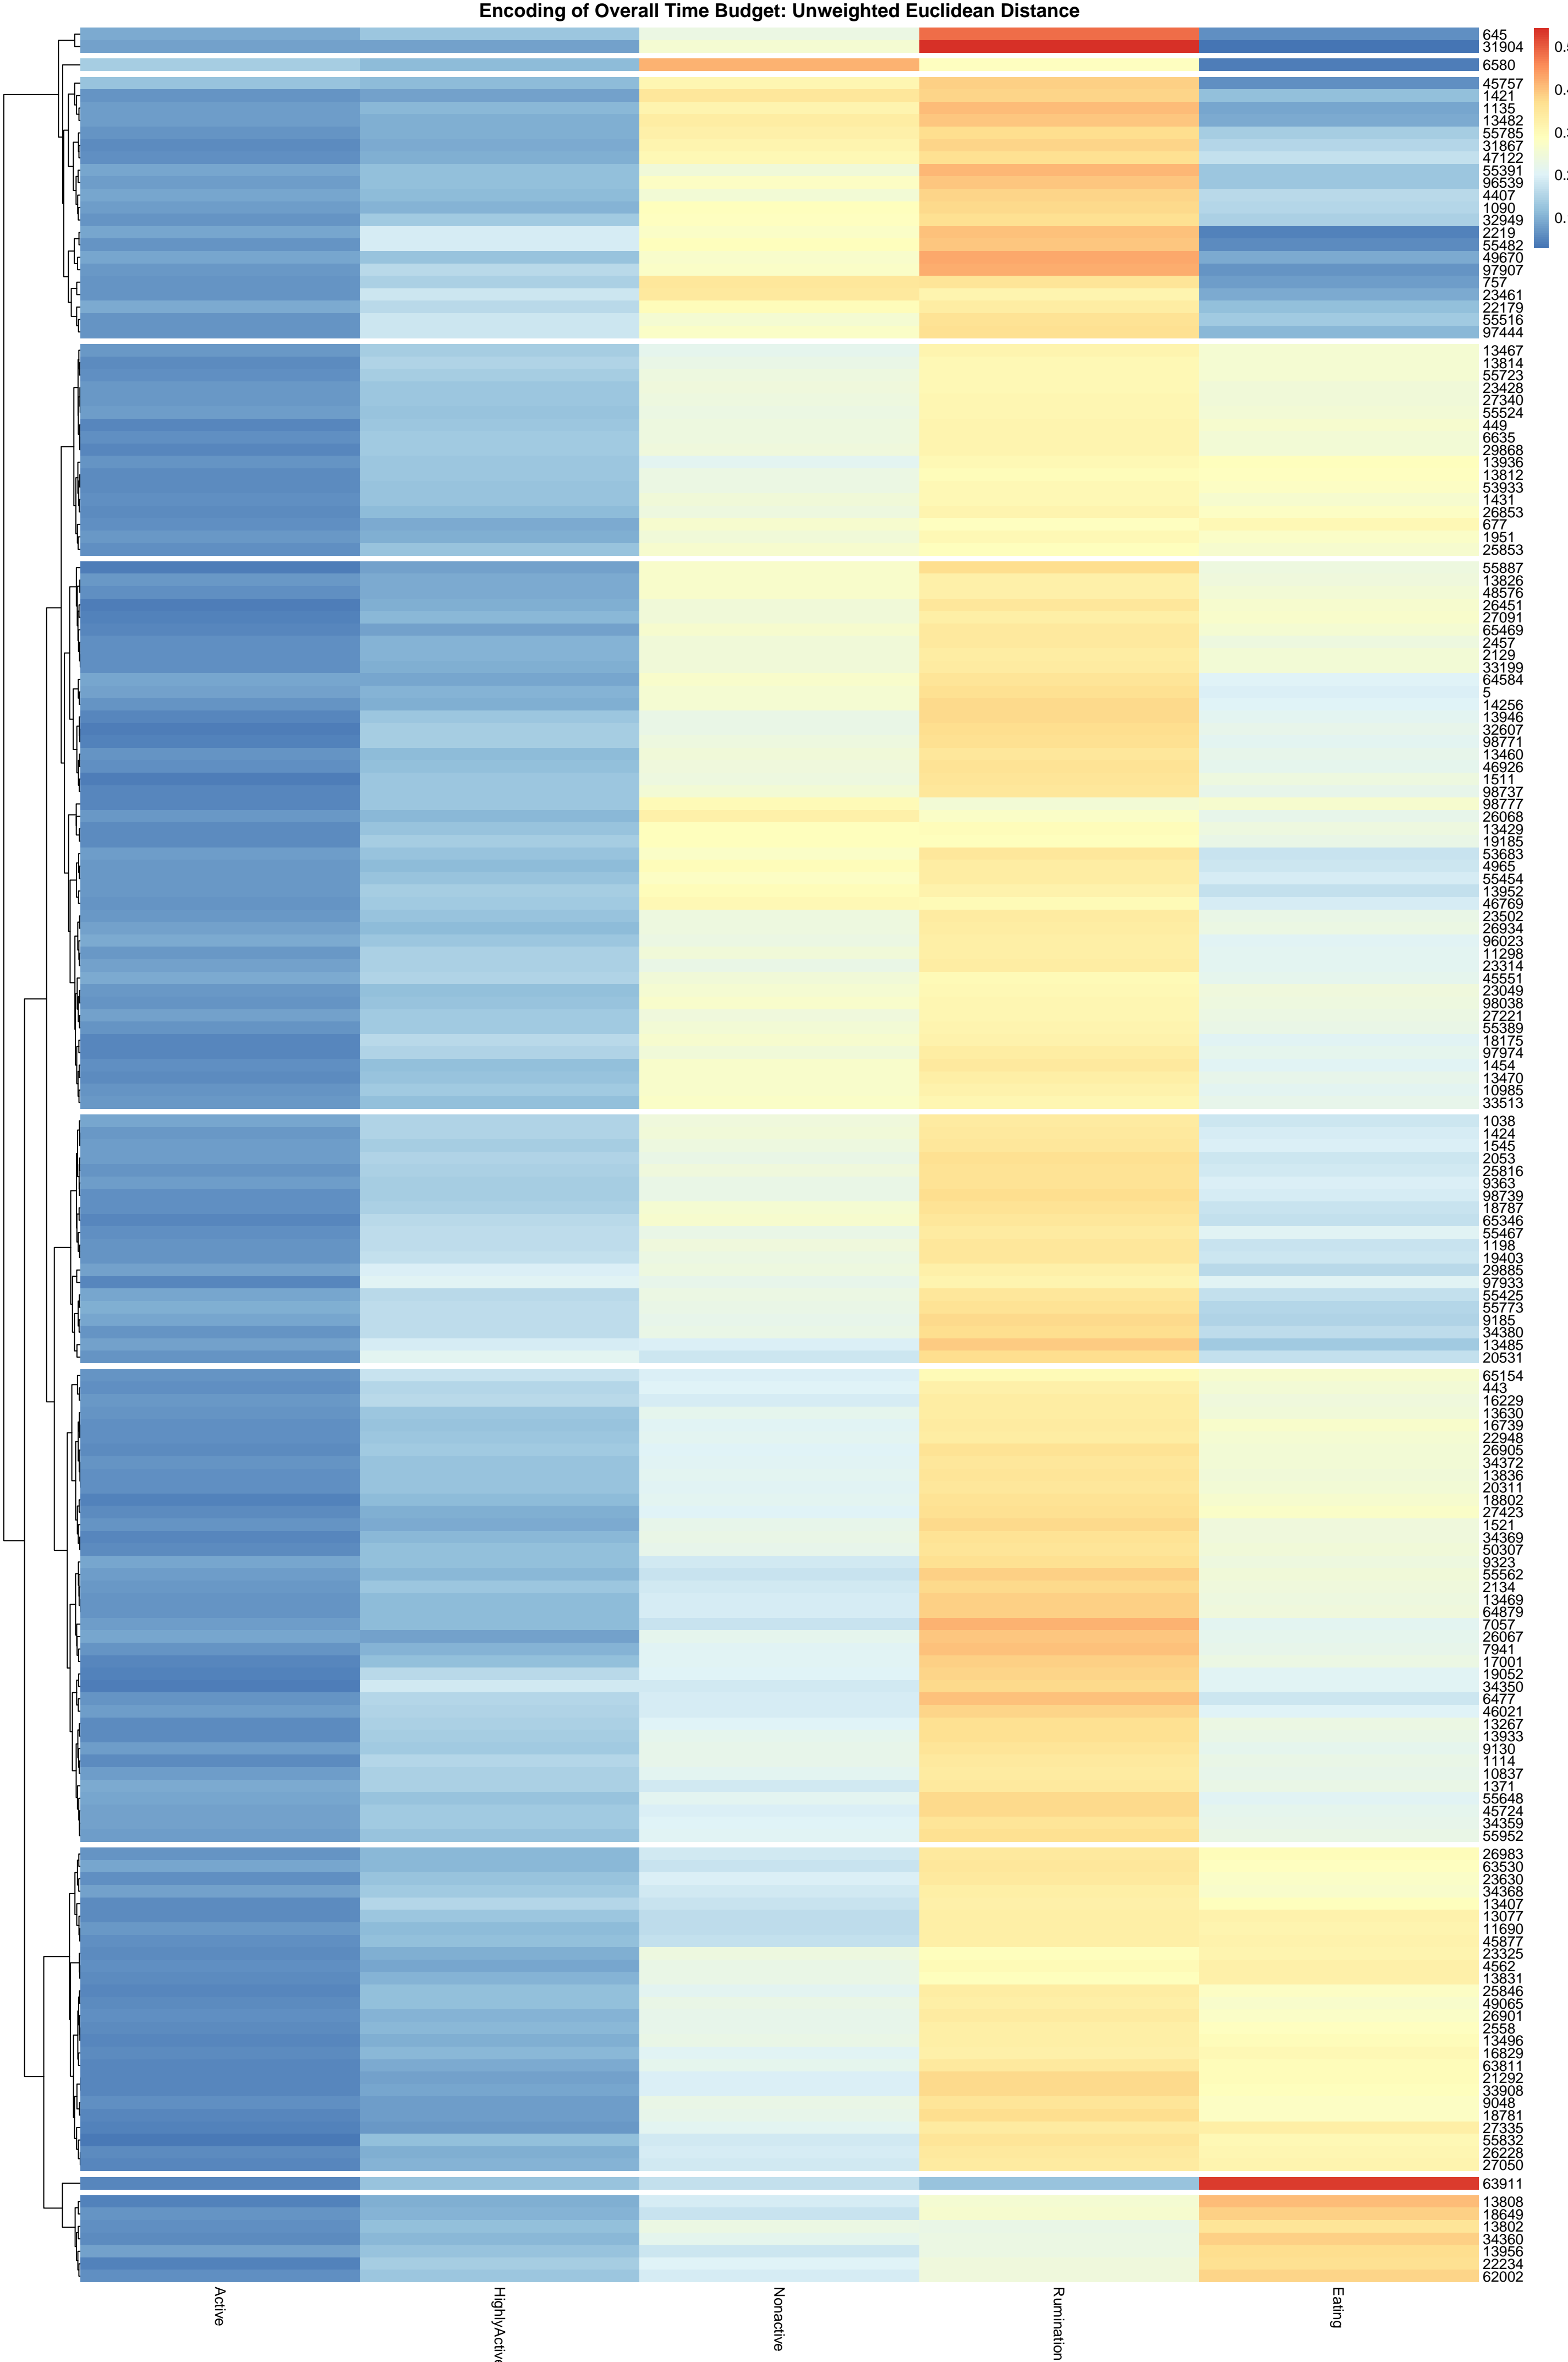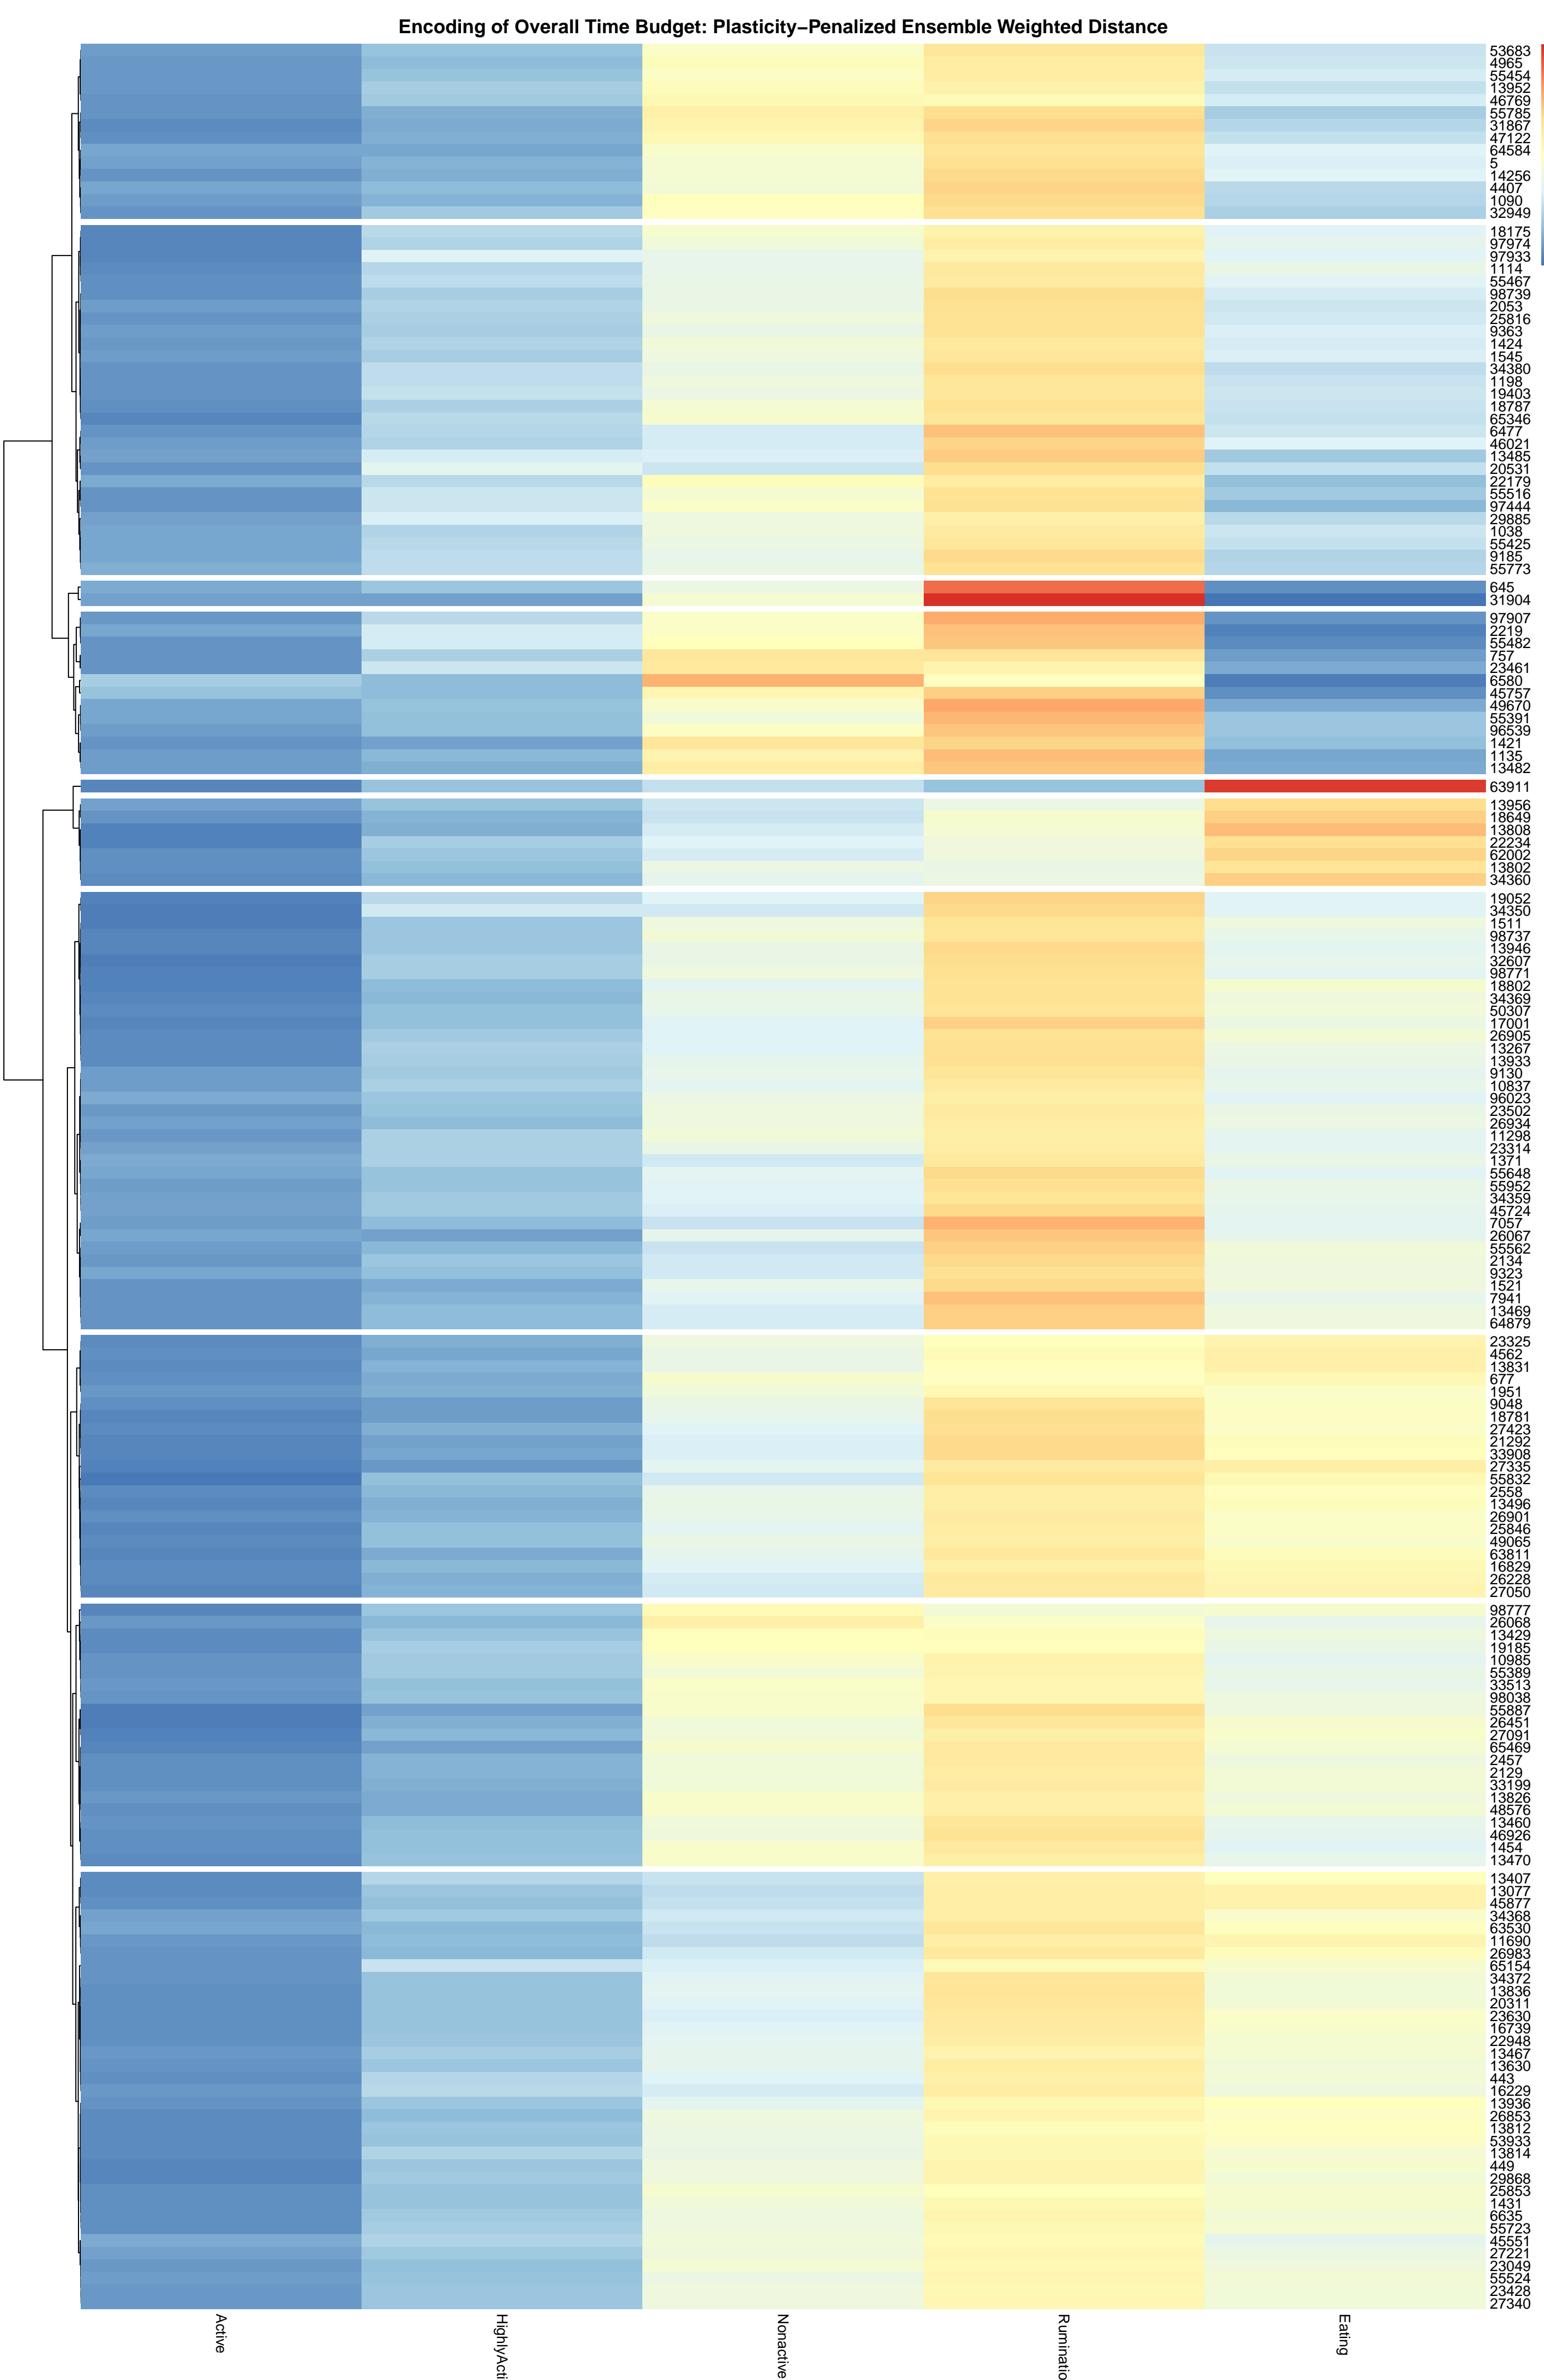

|    |   |   |    |    |    |    |    |    |   |   |
|----|---|---|----|----|----|----|----|----|---|---|
| 1  | 0 | 0 | 6  | 0  | 8  | 0  | 0  | 0  | 0 | 0 |
| 2  | 0 | 0 | 3  | 0  | 2  | 20 | 3  | 0  | 0 | 0 |
| 3  | 2 | 0 | 0  | 0  | 0  | 0  | 0  | 0  | 0 | 0 |
| 4  | 0 | 1 | 12 | 0  | 0  | 0  | 0  | 0  | 0 | 0 |
| 5  | 0 | 0 | 0  | 0  | 0  | 0  | 0  | 0  | 1 | 0 |
| 6  | 0 | 0 | 0  | 0  | 0  | 0  | 0  | 0  | 0 | 7 |
| 7  | 0 | 0 | 0  | 0  | 10 | 0  | 25 | 0  | 0 | 0 |
| 8  | 0 | 0 | 0  | 2  | 0  | 0  | 1  | 18 | 0 | 0 |
| 9  | 0 | 0 | 0  | 0  | 21 | 0  | 0  | 0  | 0 | 0 |
| 10 | 0 | 0 | 0  | 15 | 3  | 0  | 9  | 8  | 0 | 0 |

Supplement: s1 [file s1]

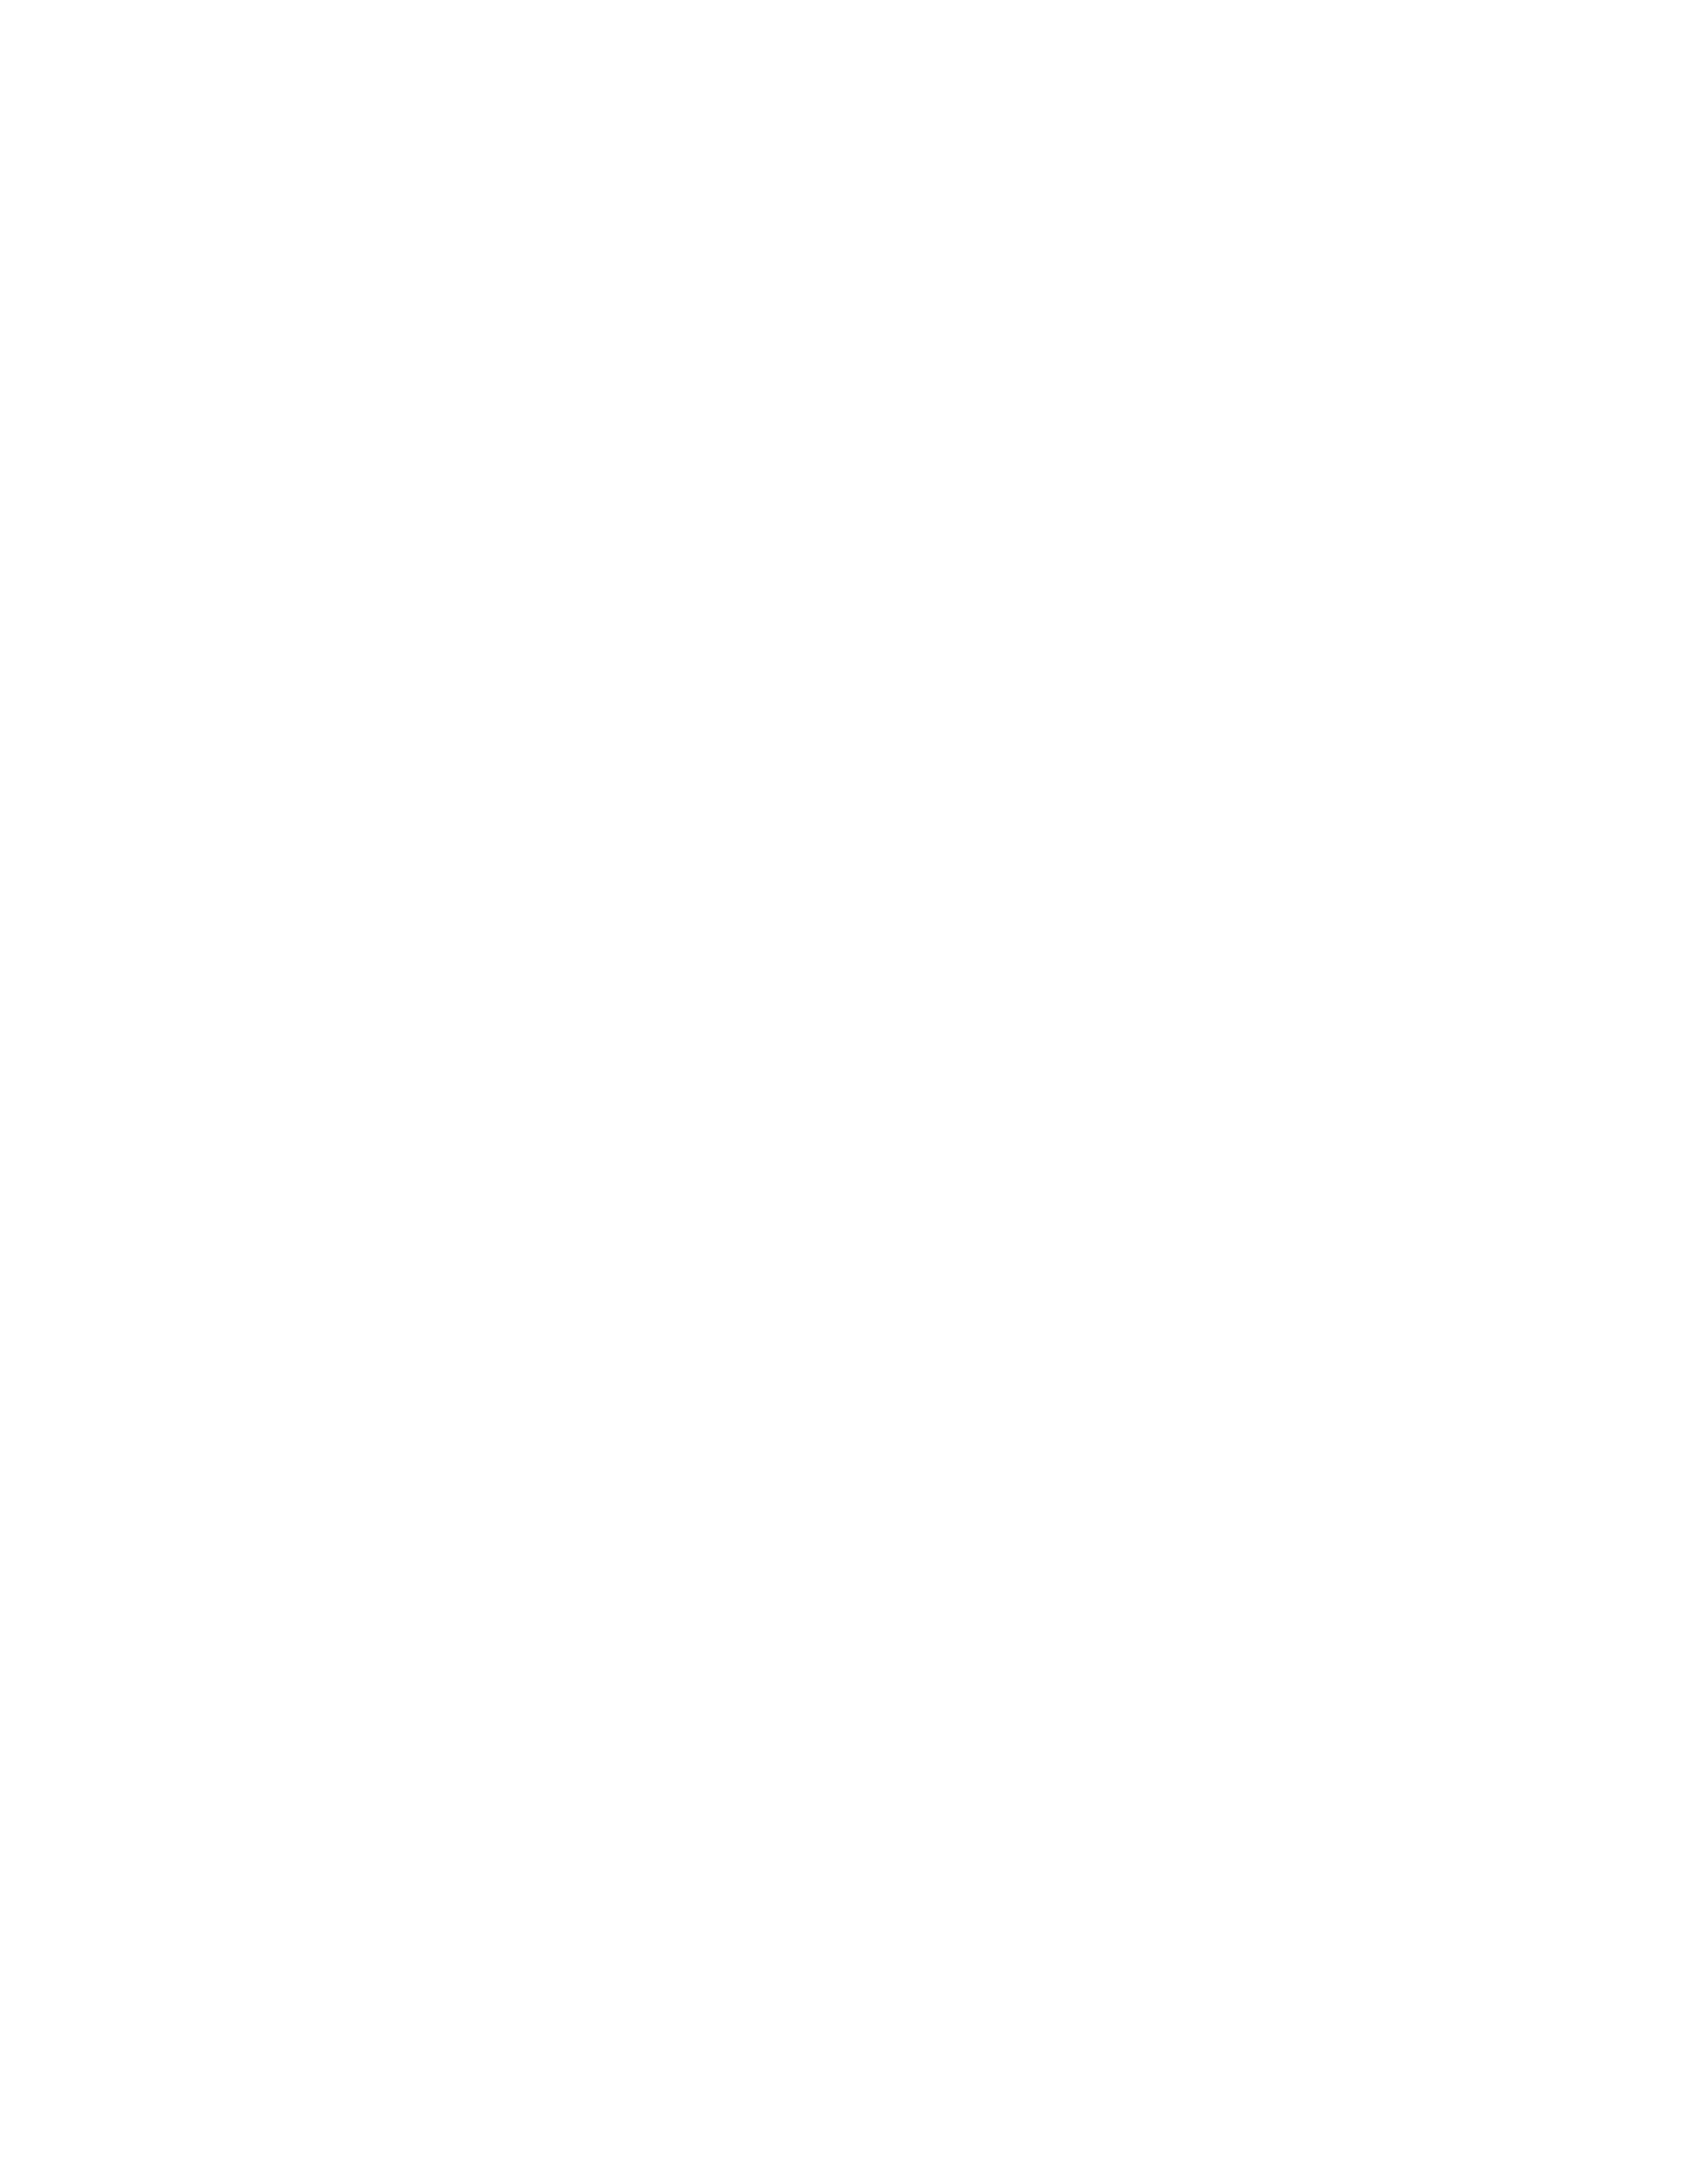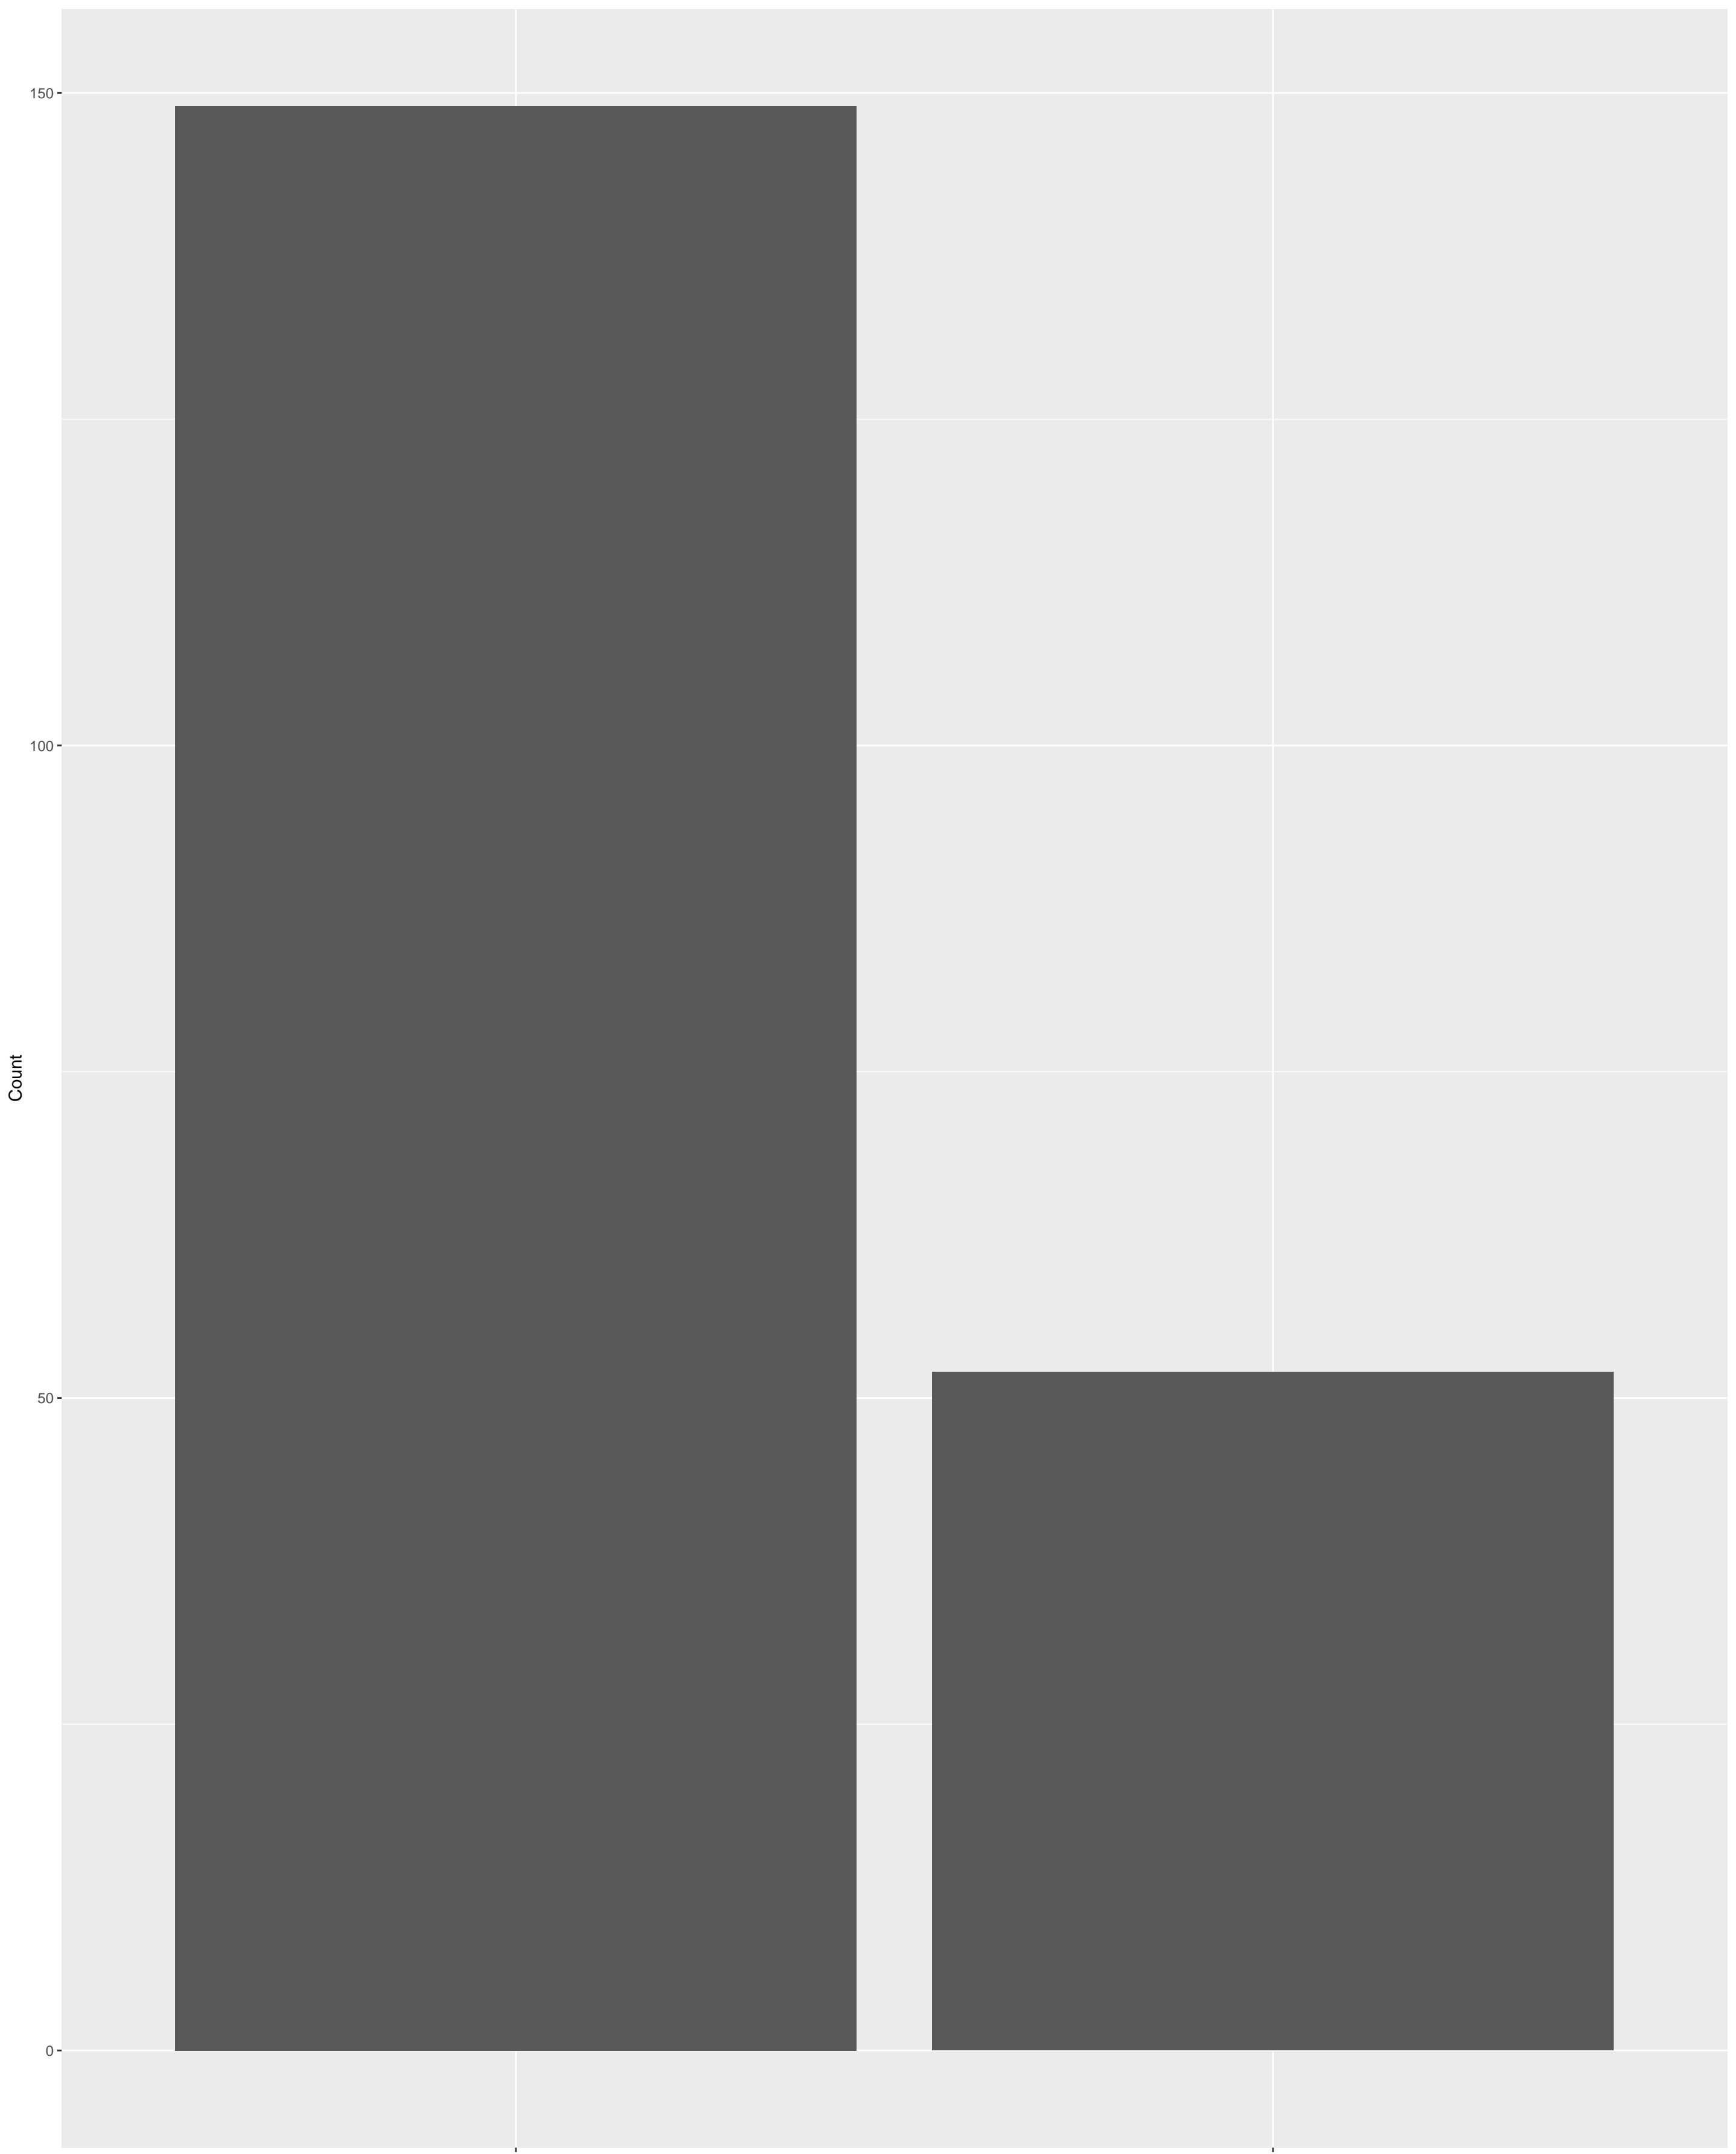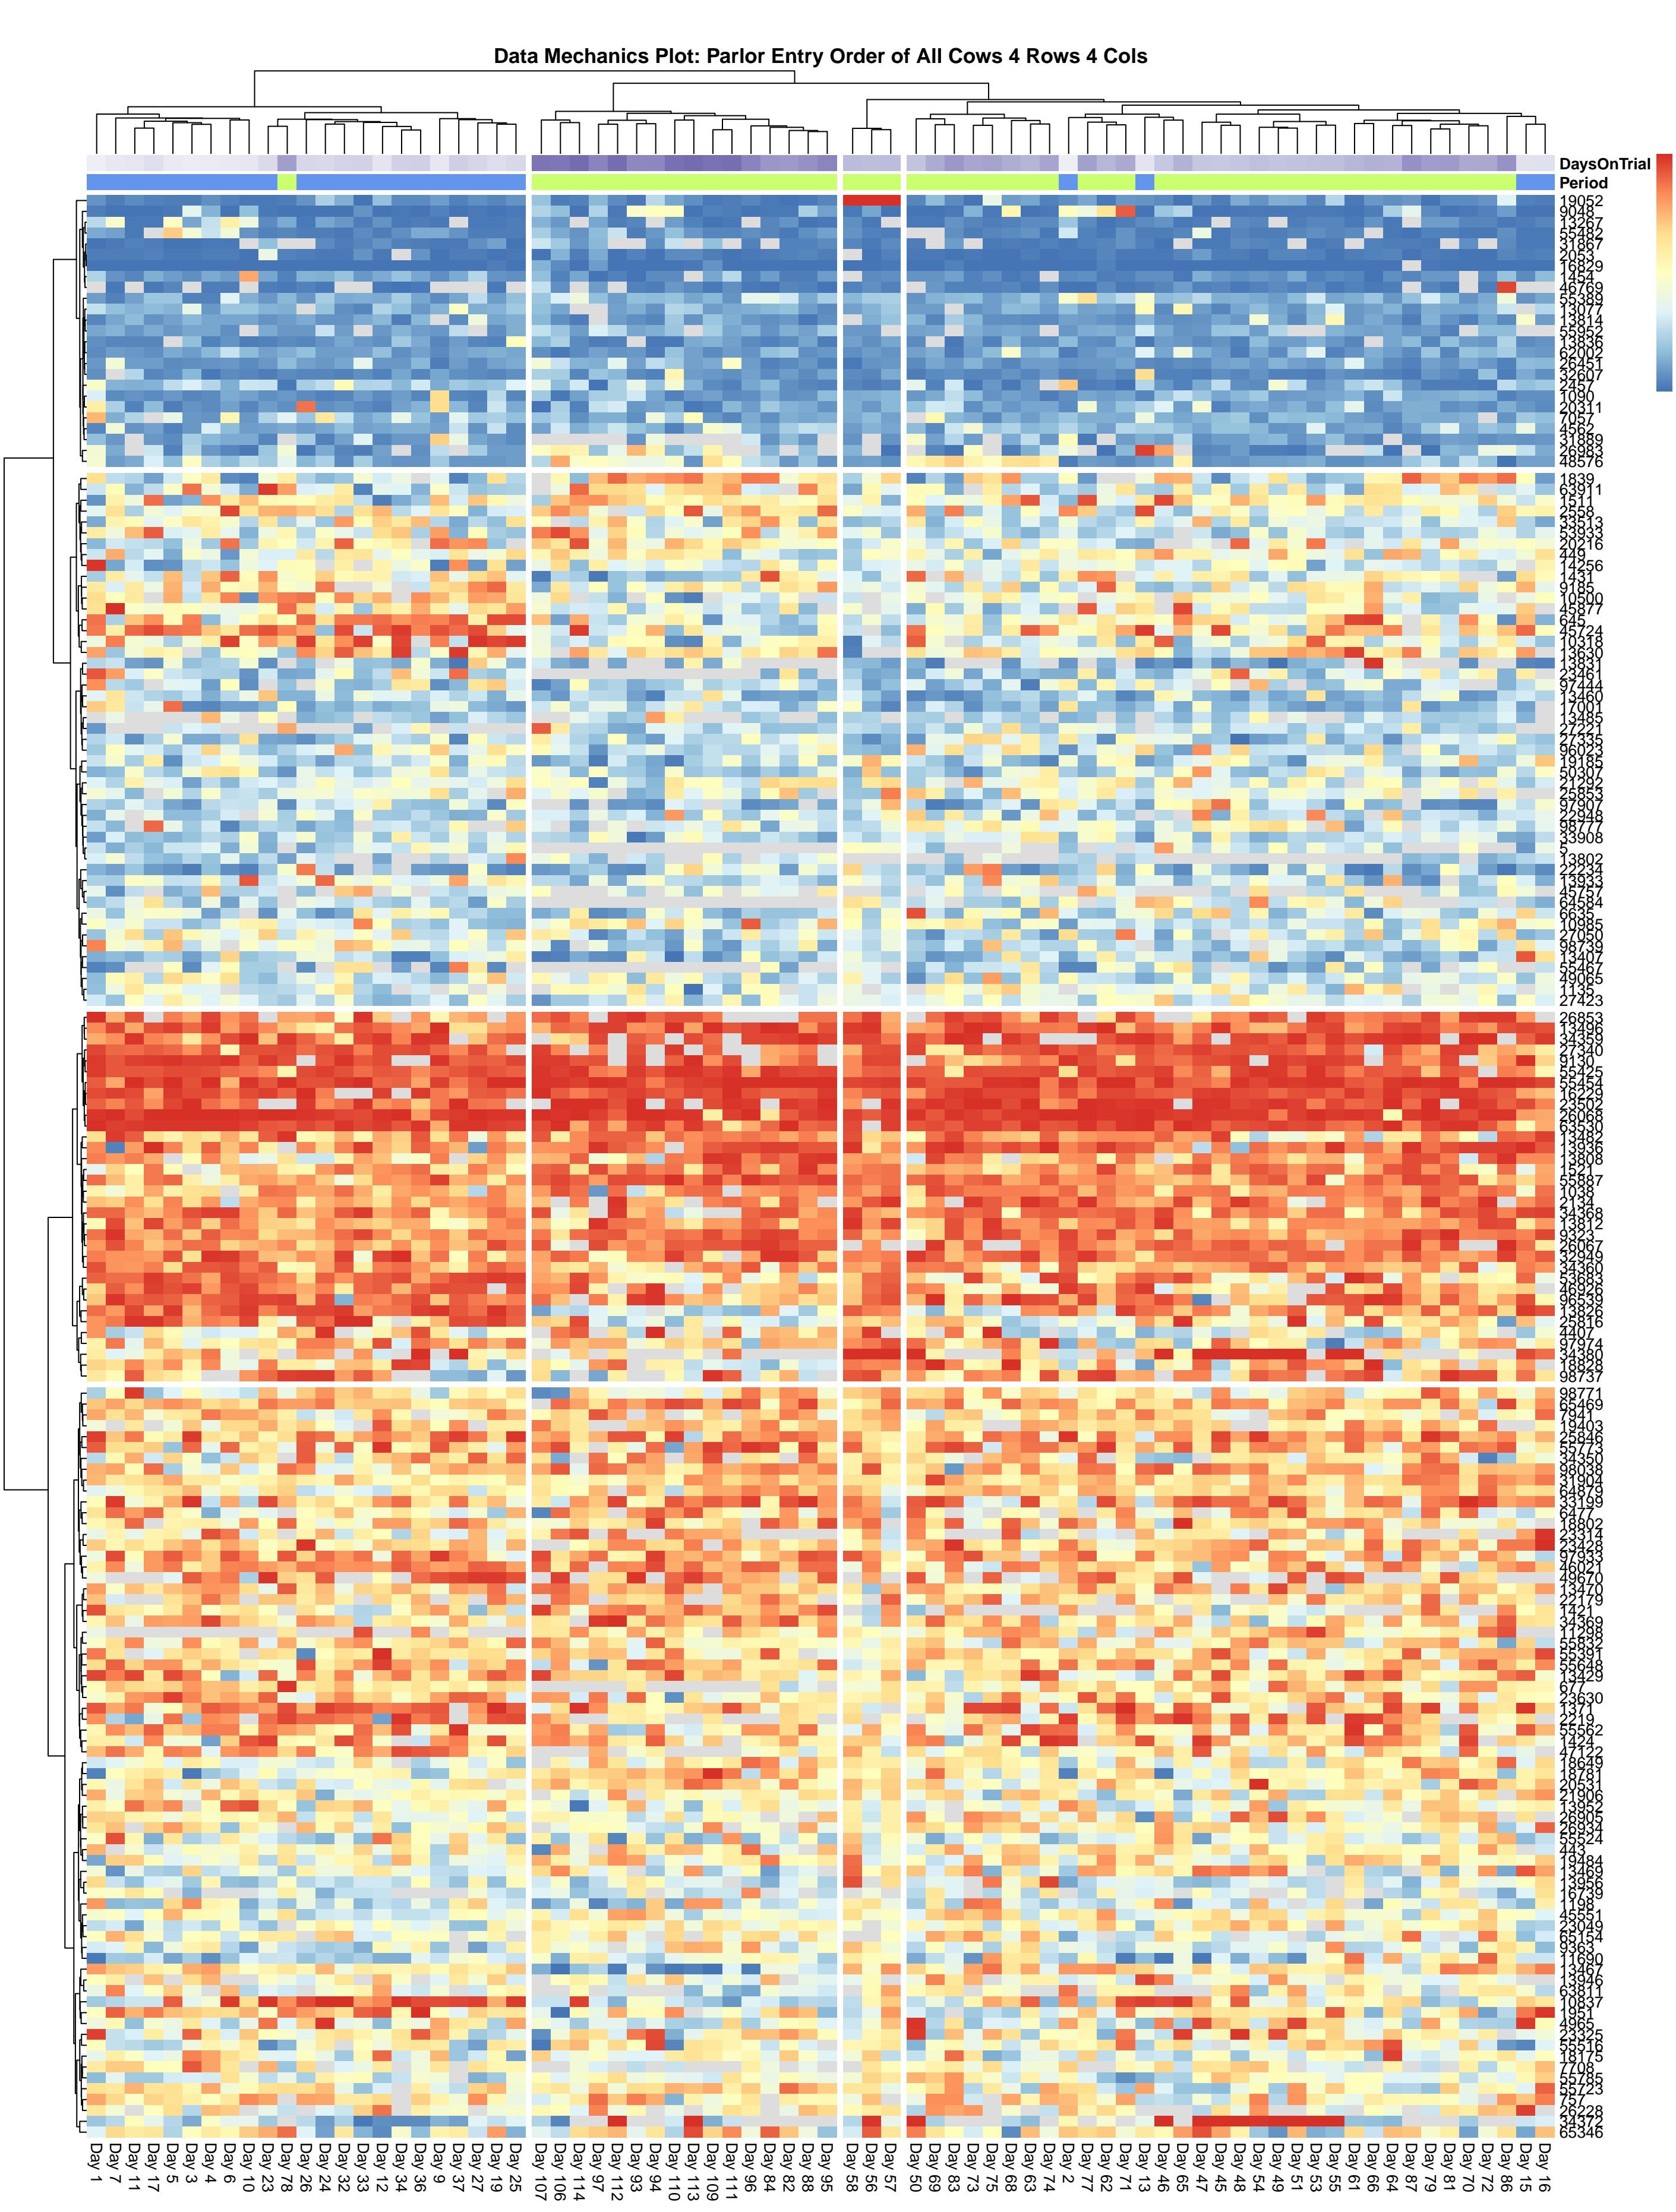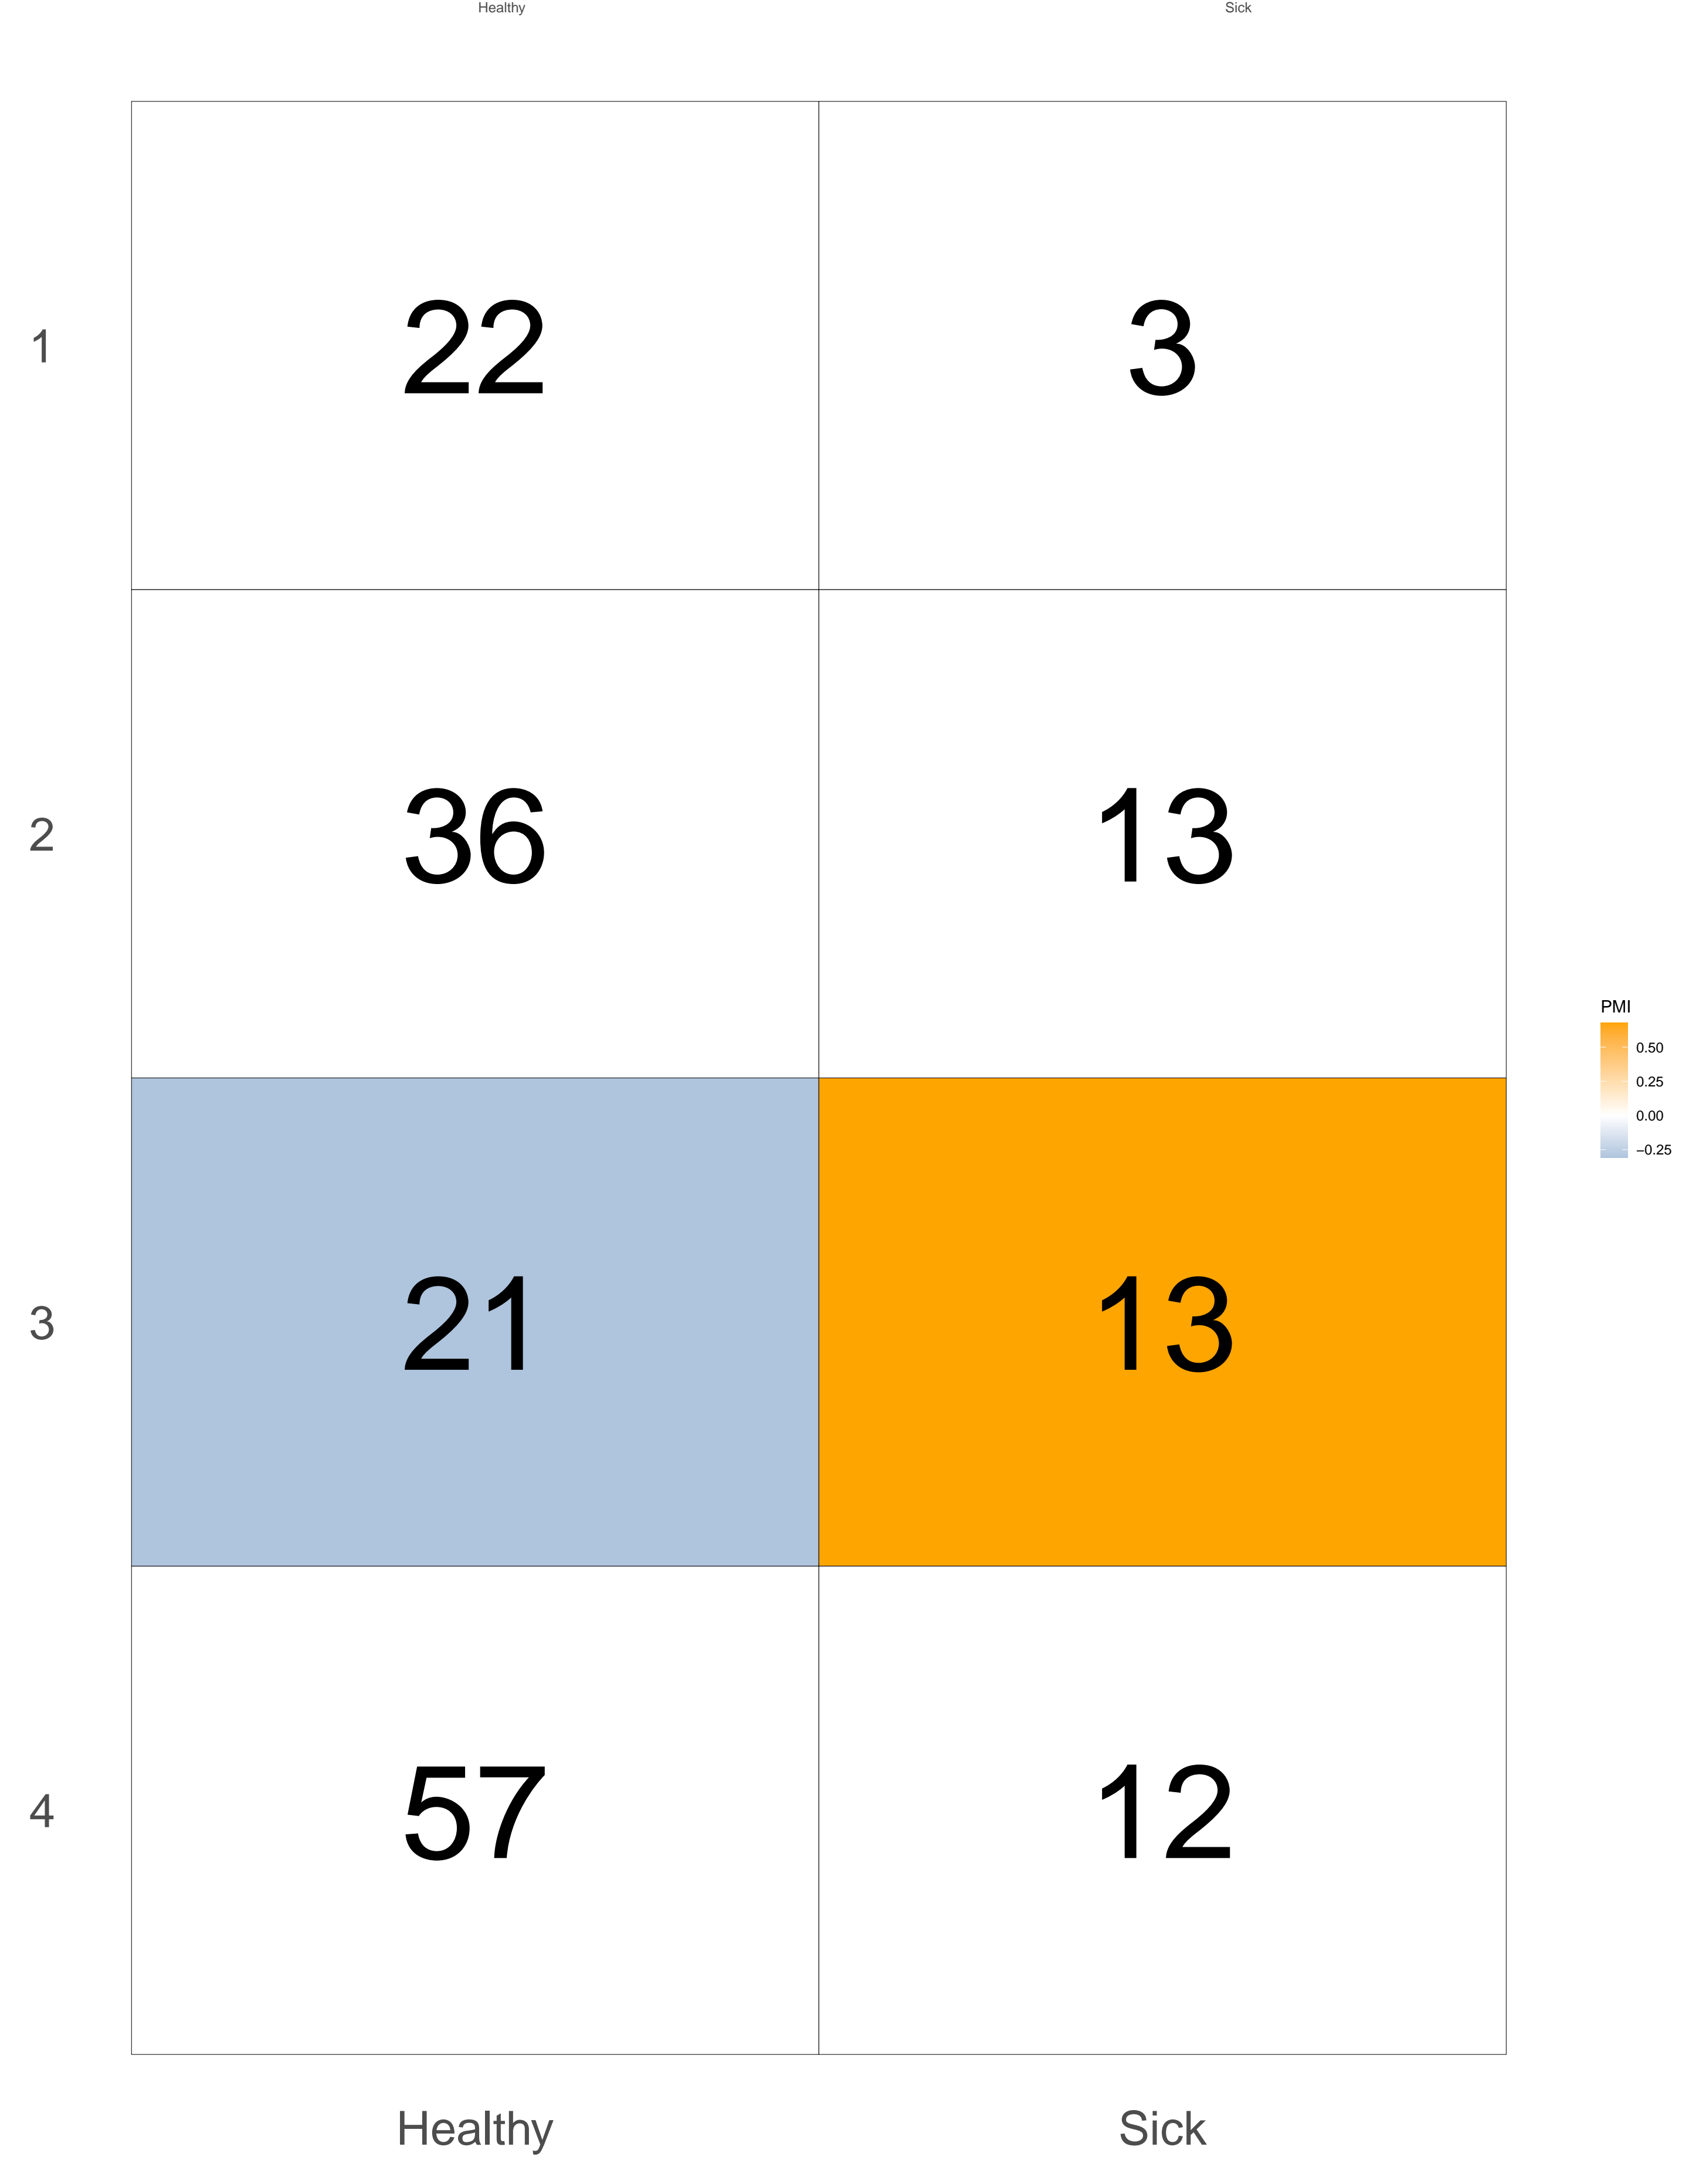

Supplement: s1 [file s1]

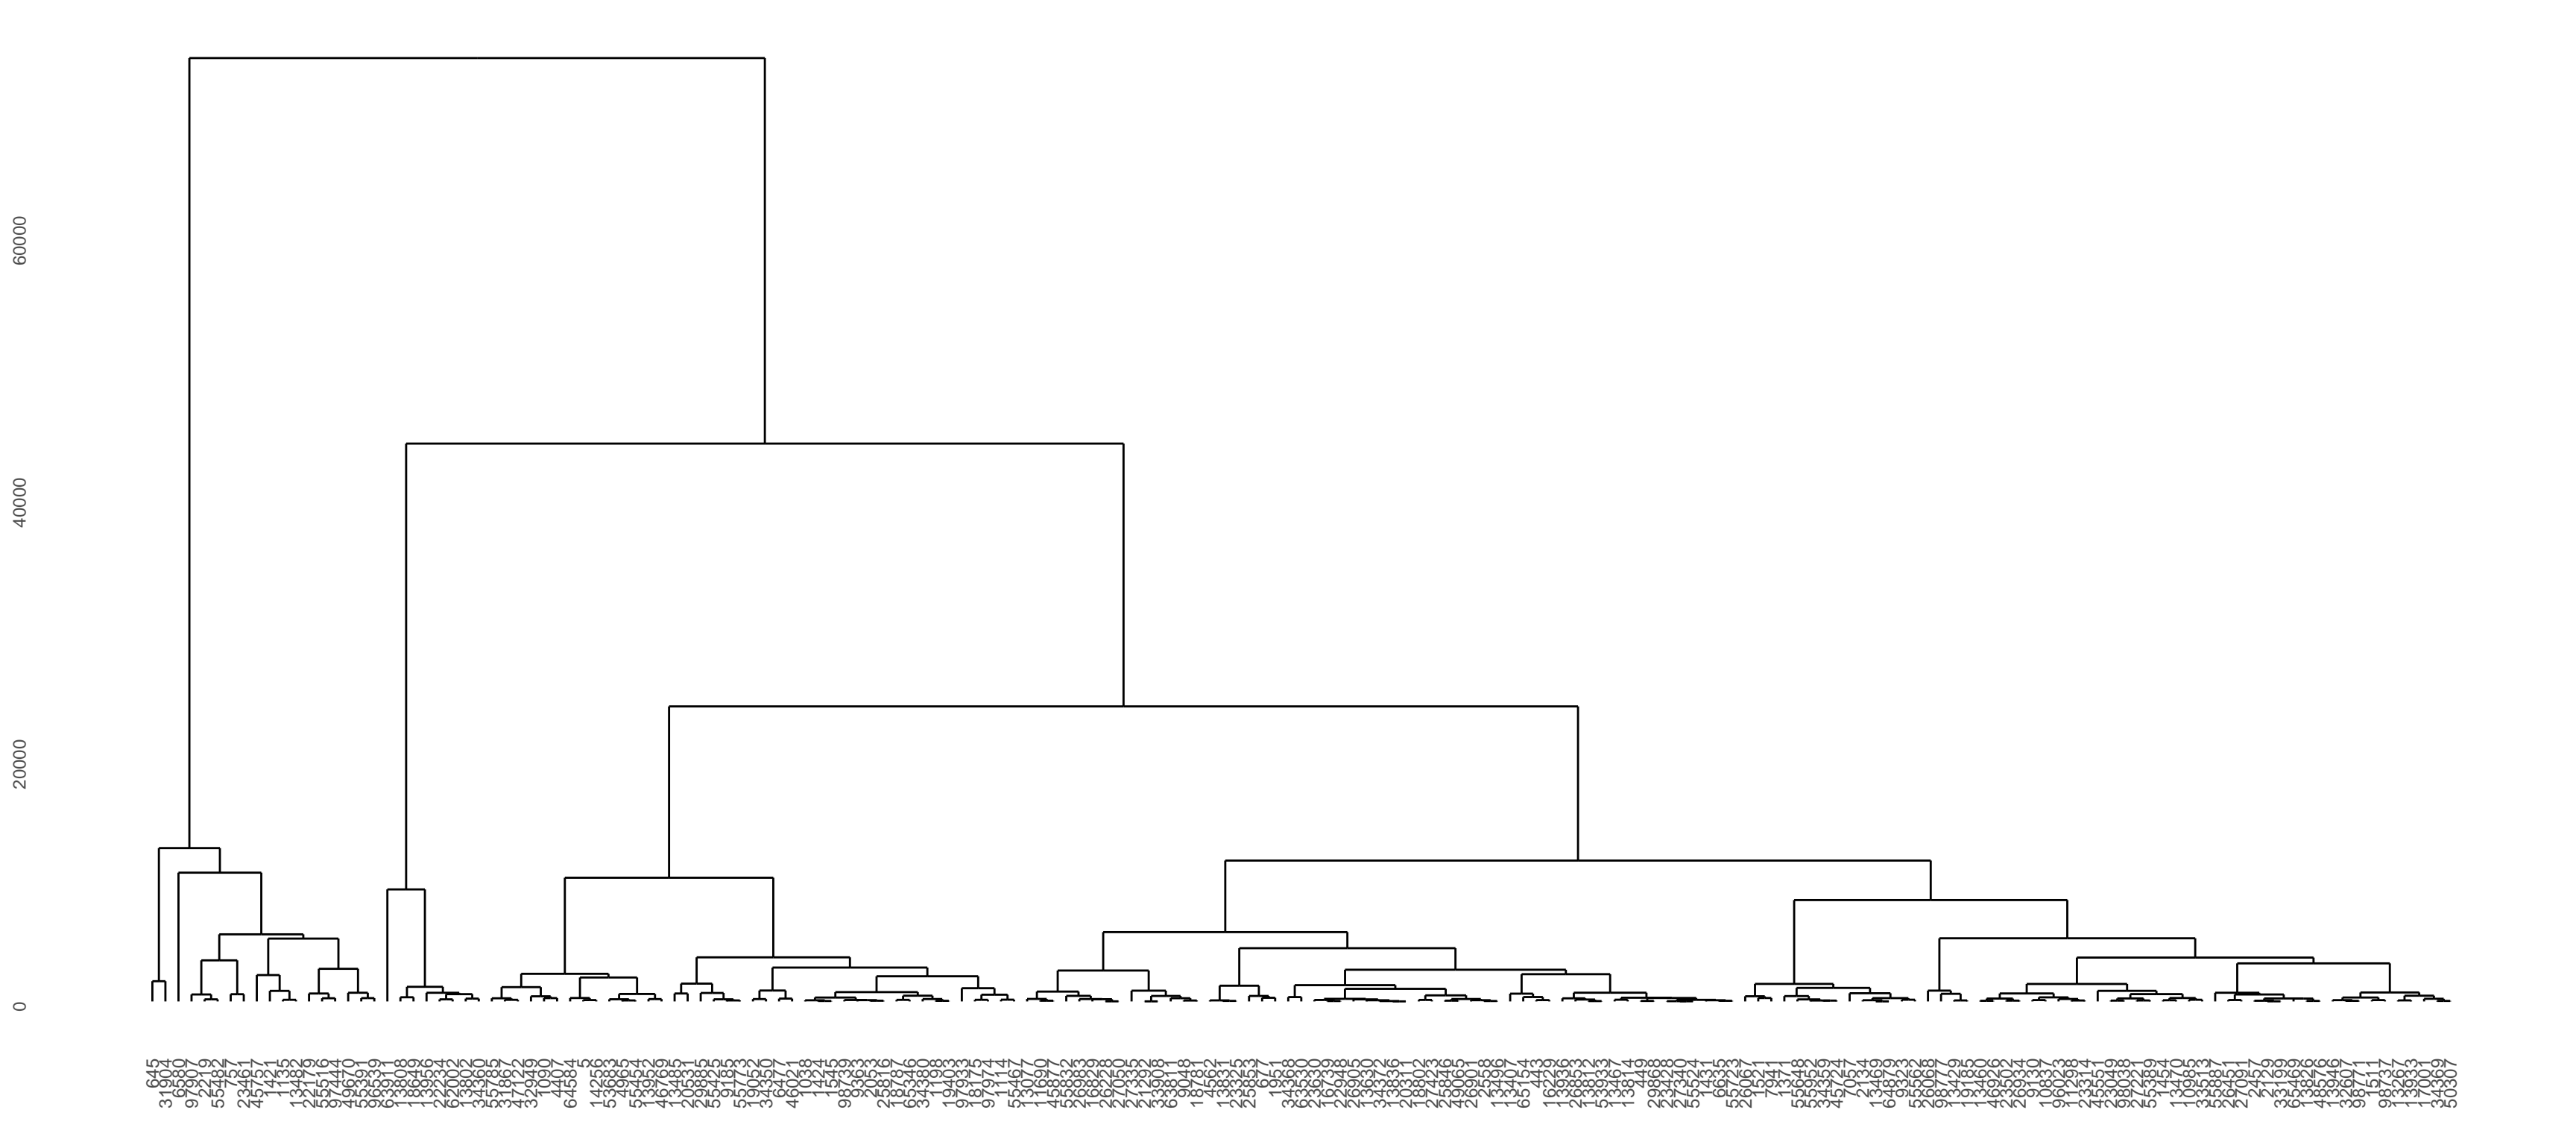

Supplement: s1 [file s1]

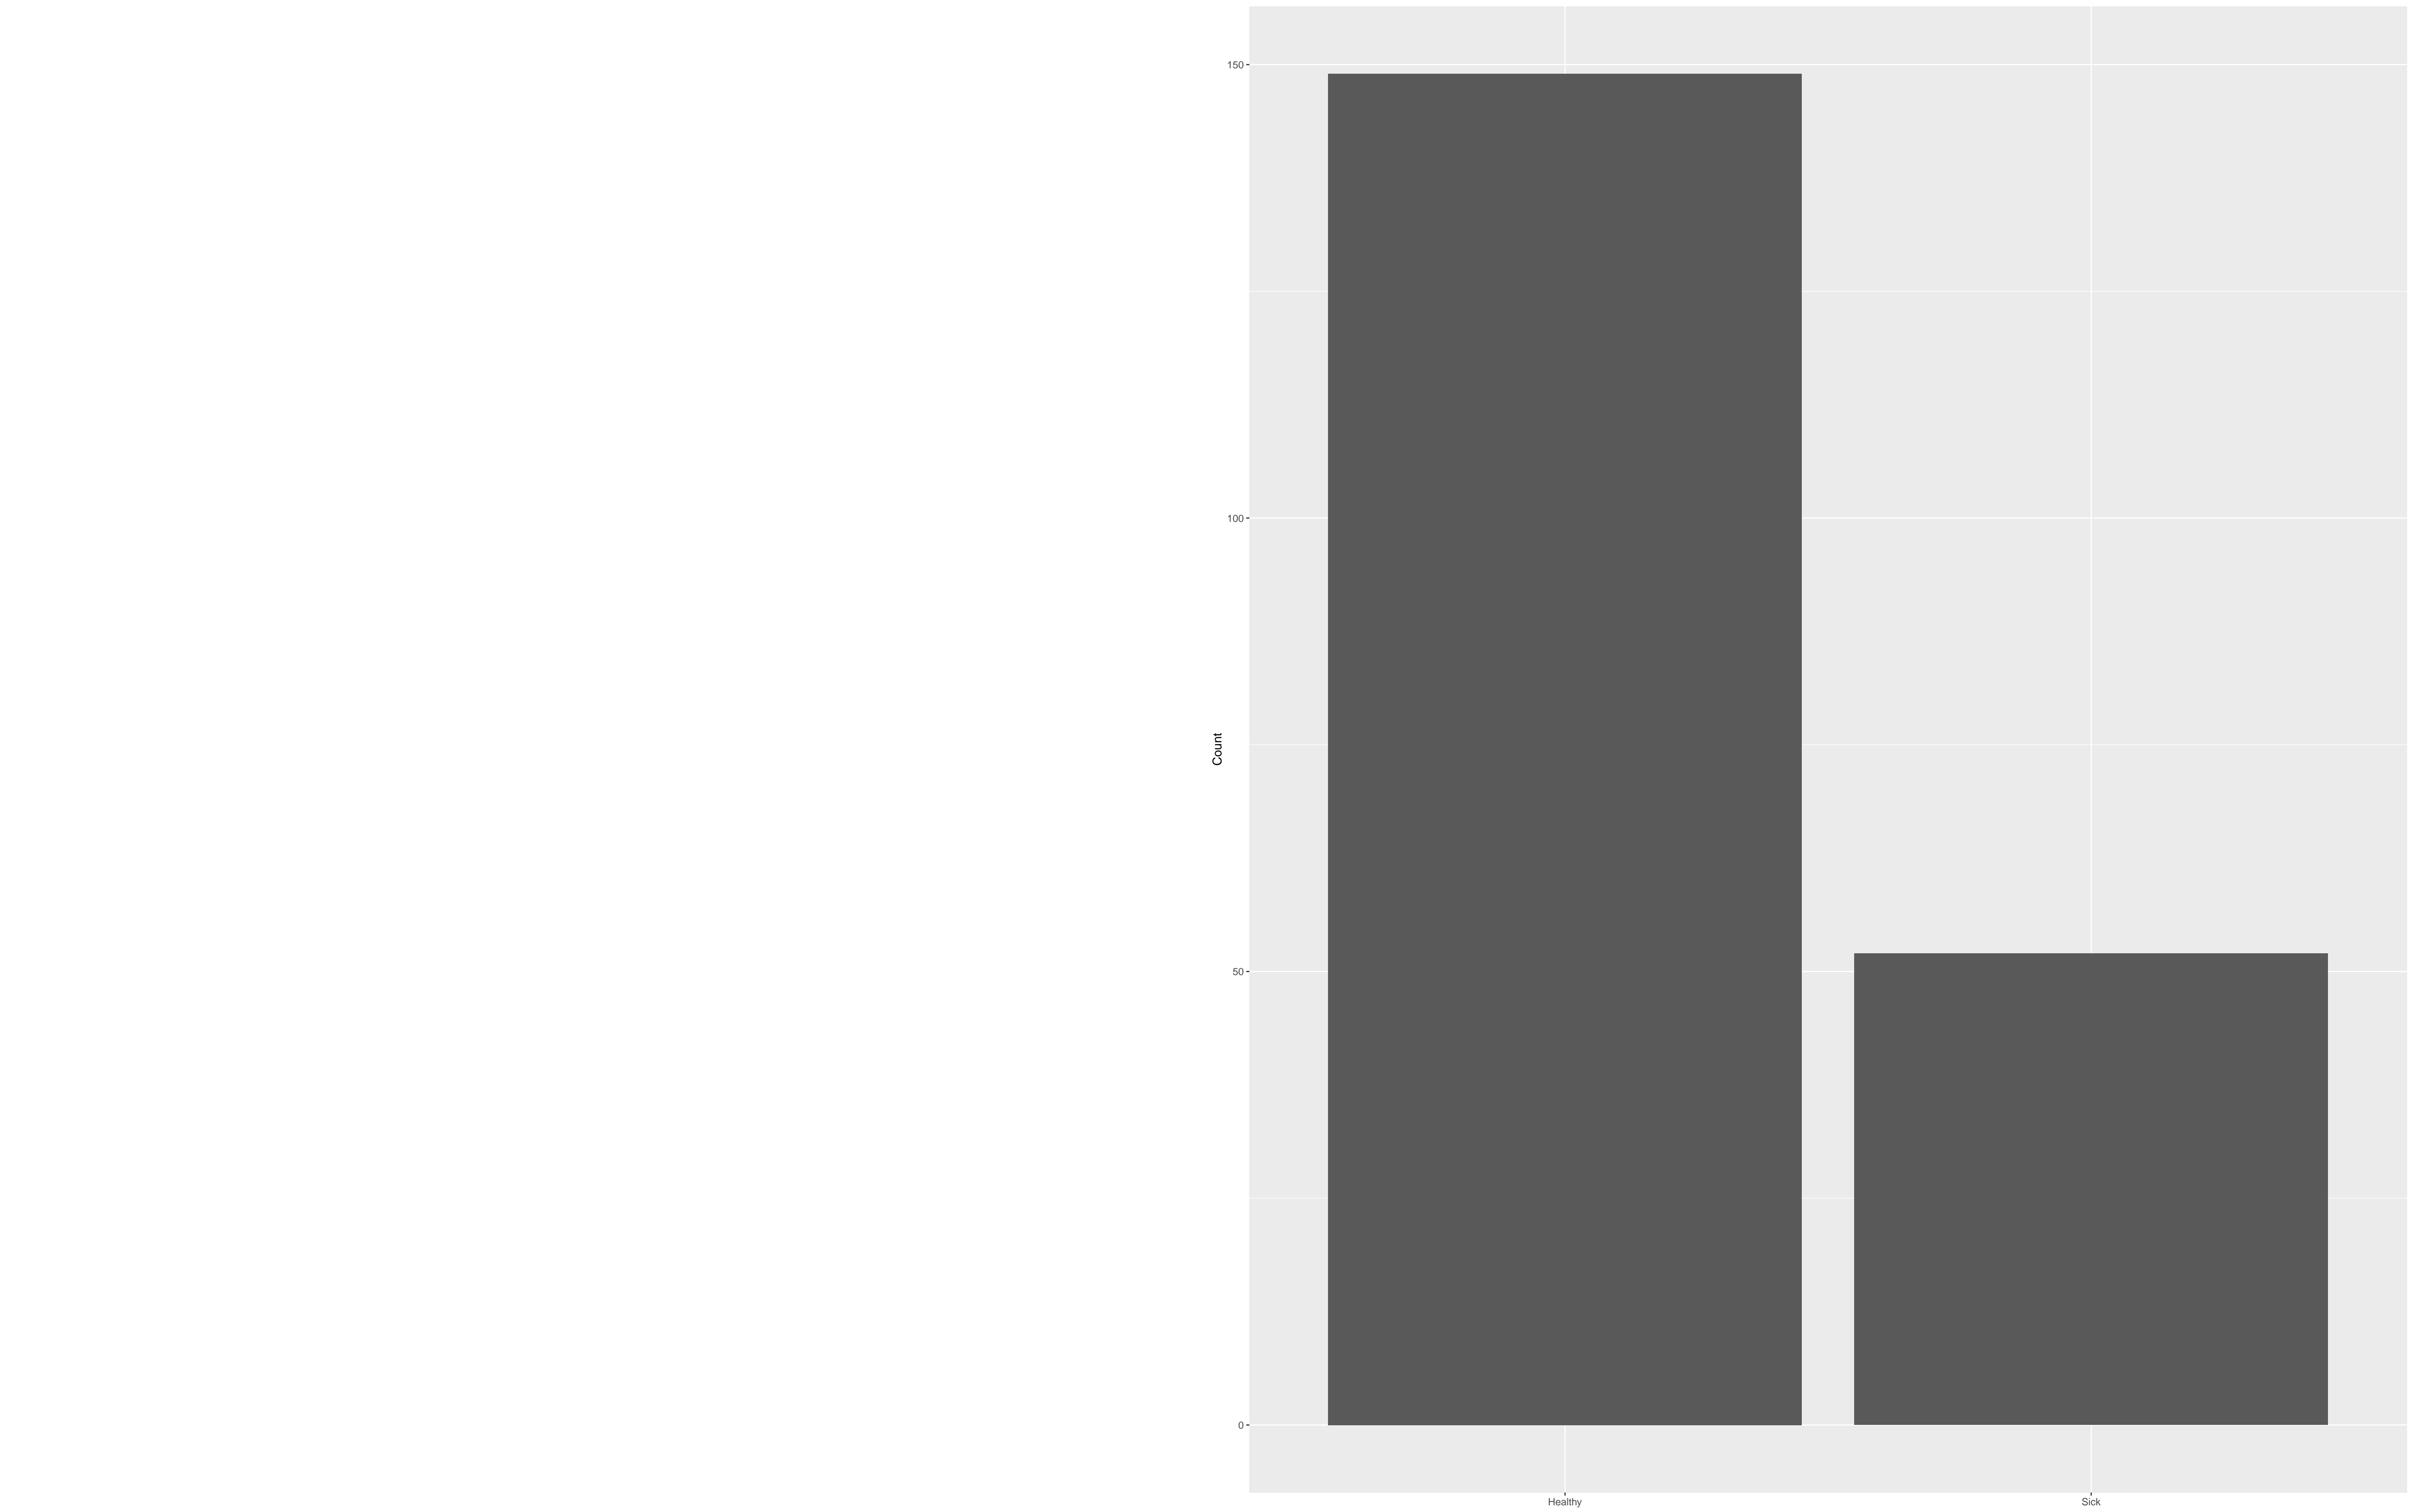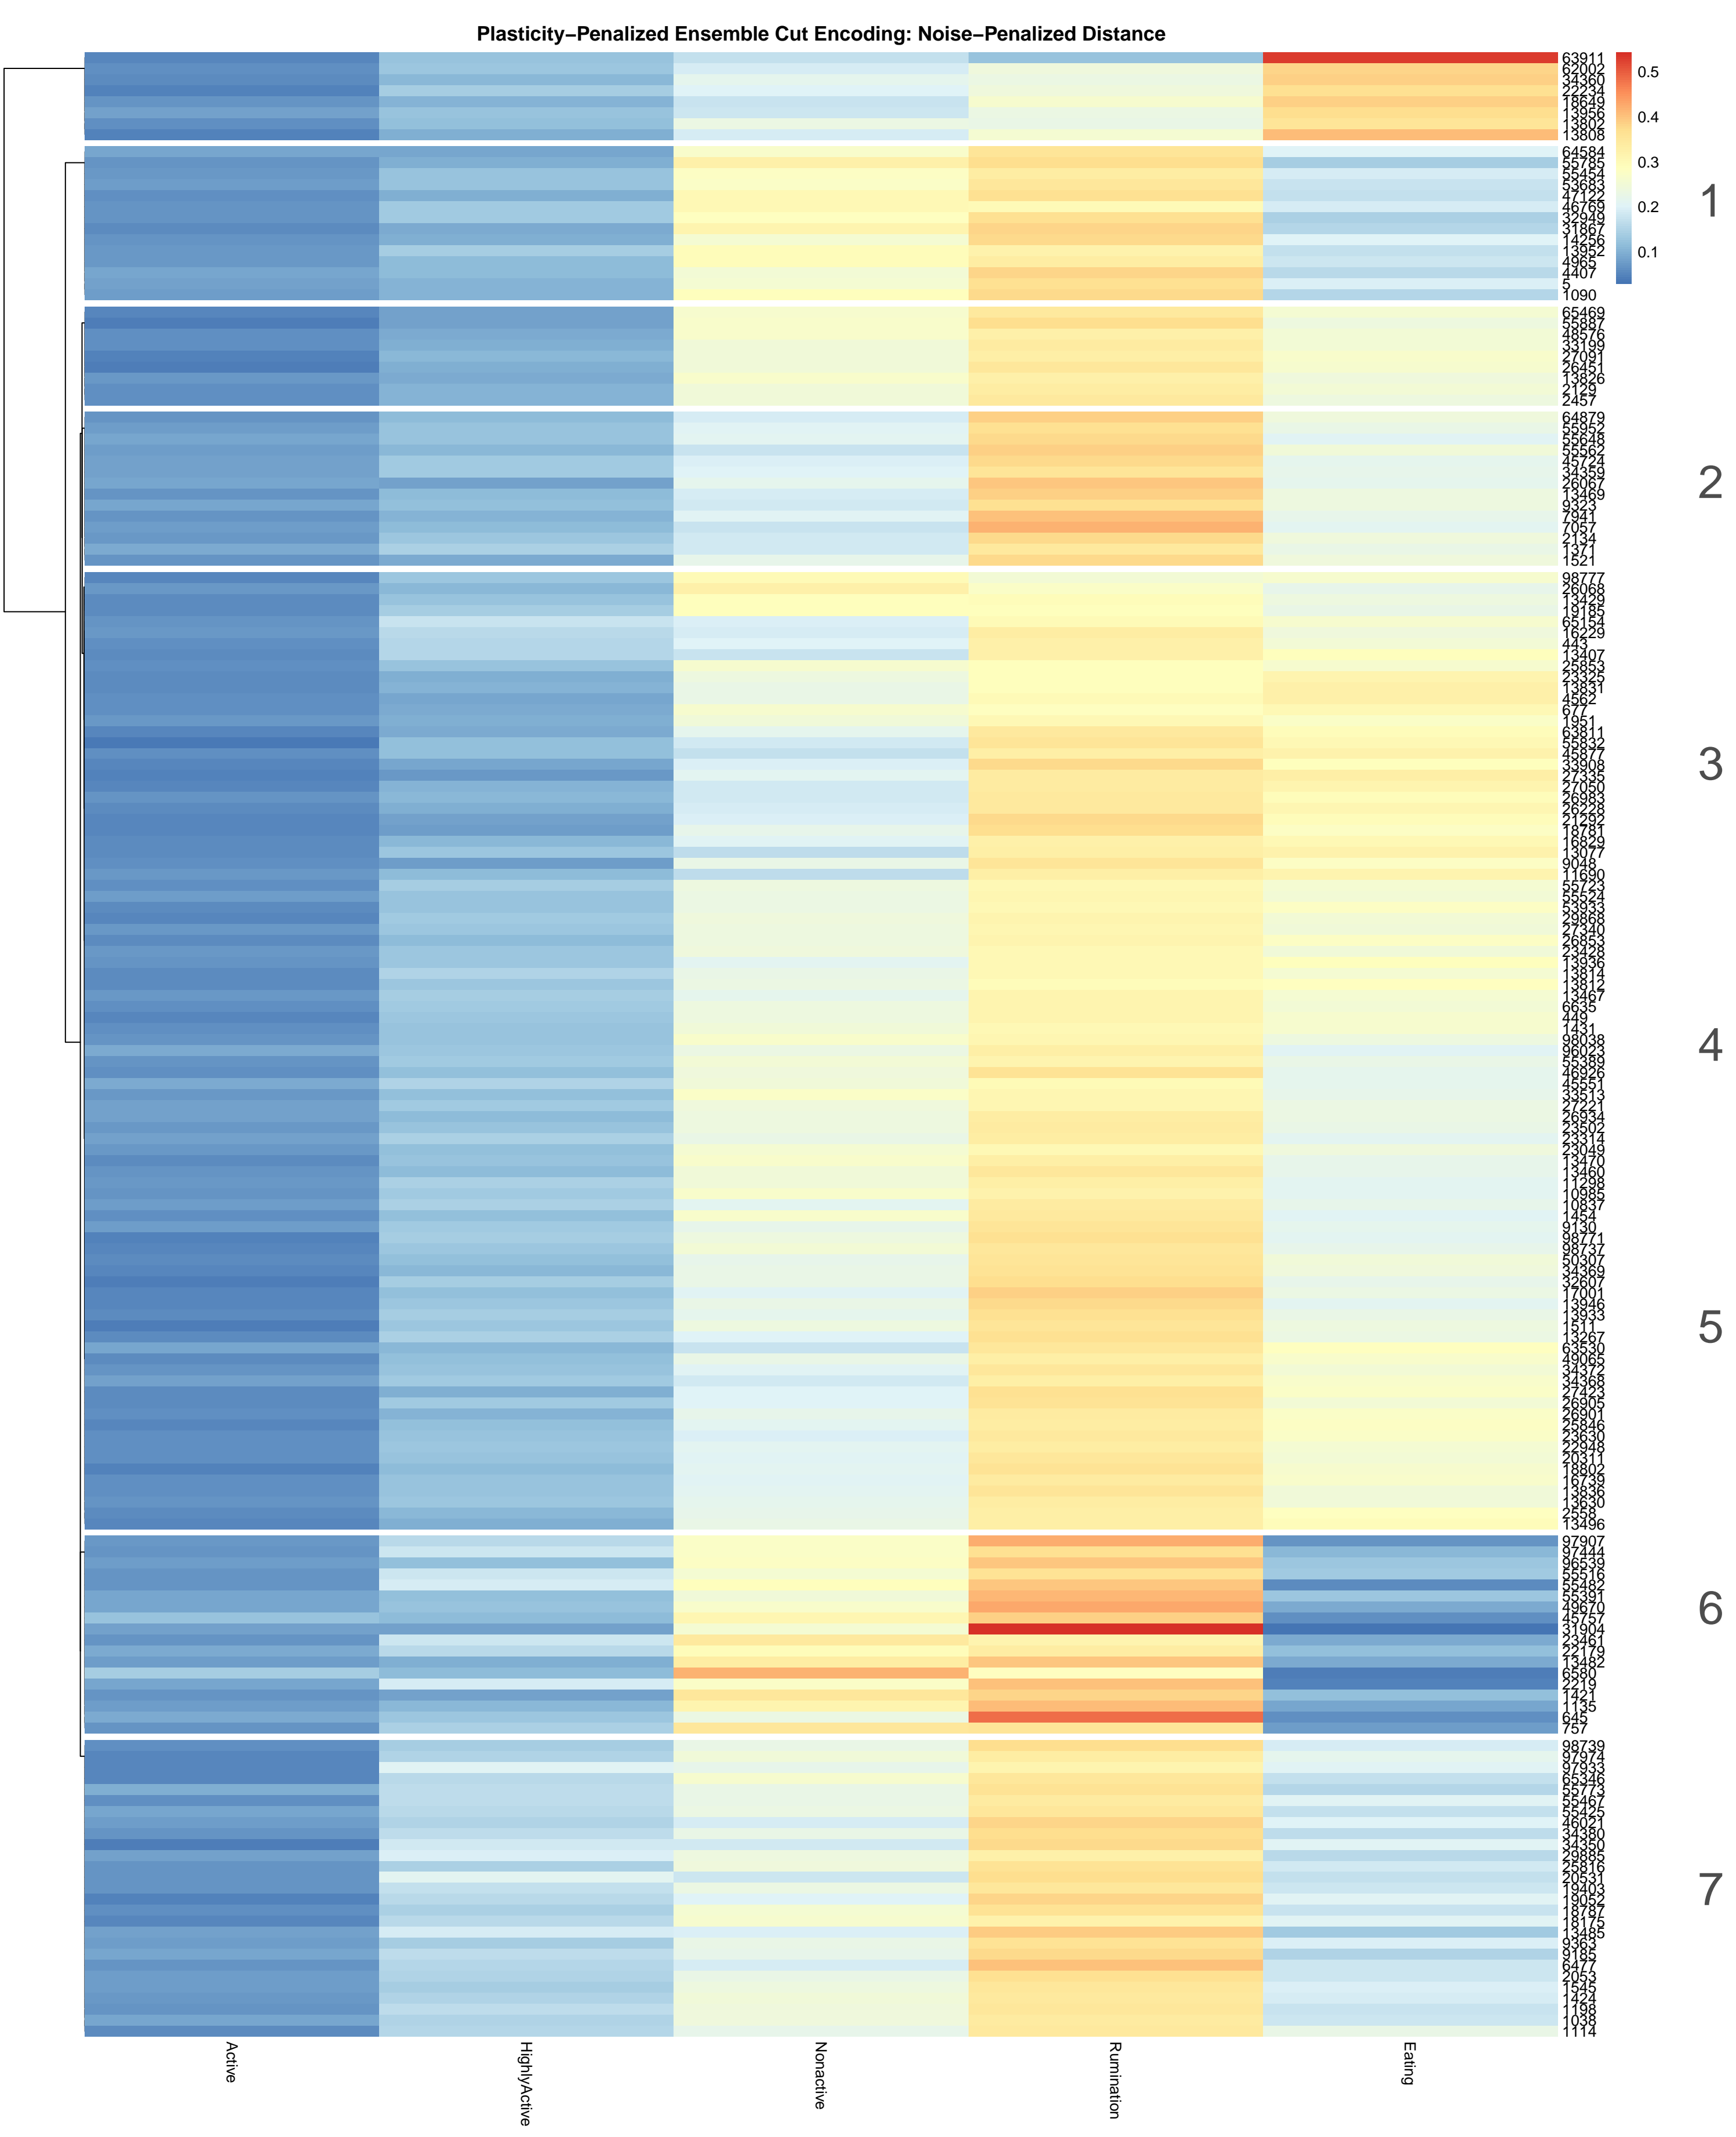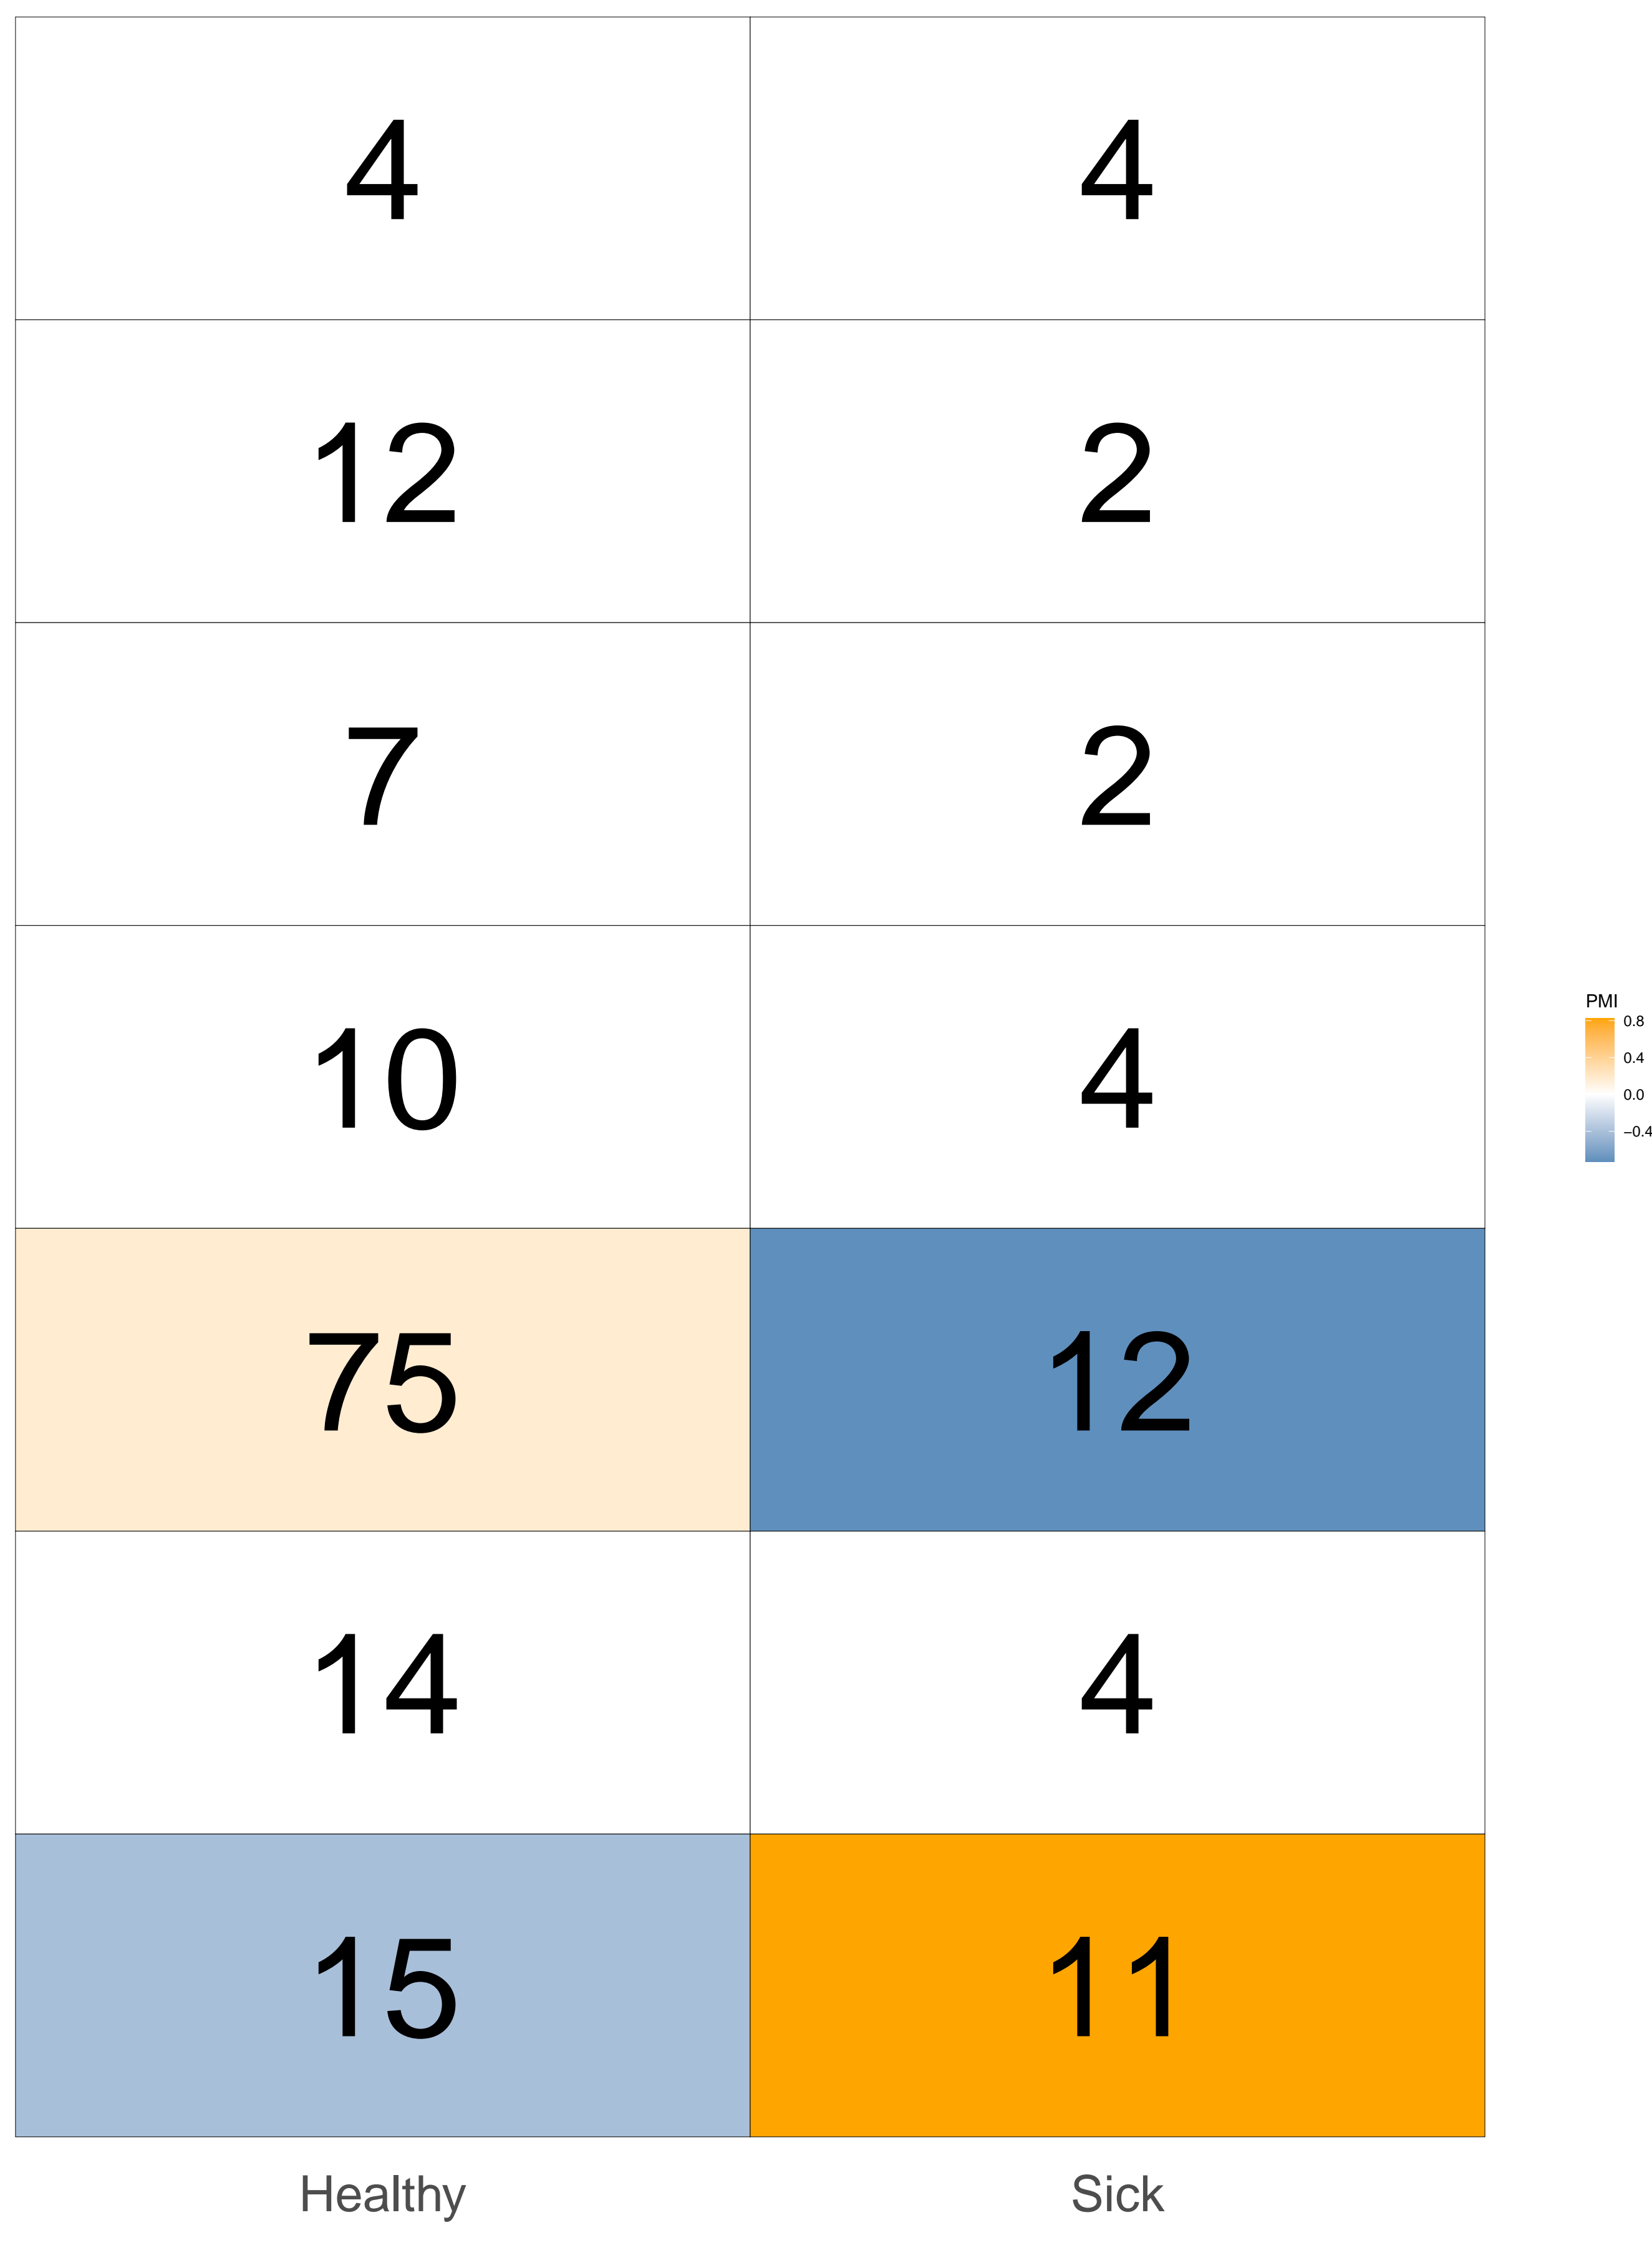

Supplement: s1 [file s1]

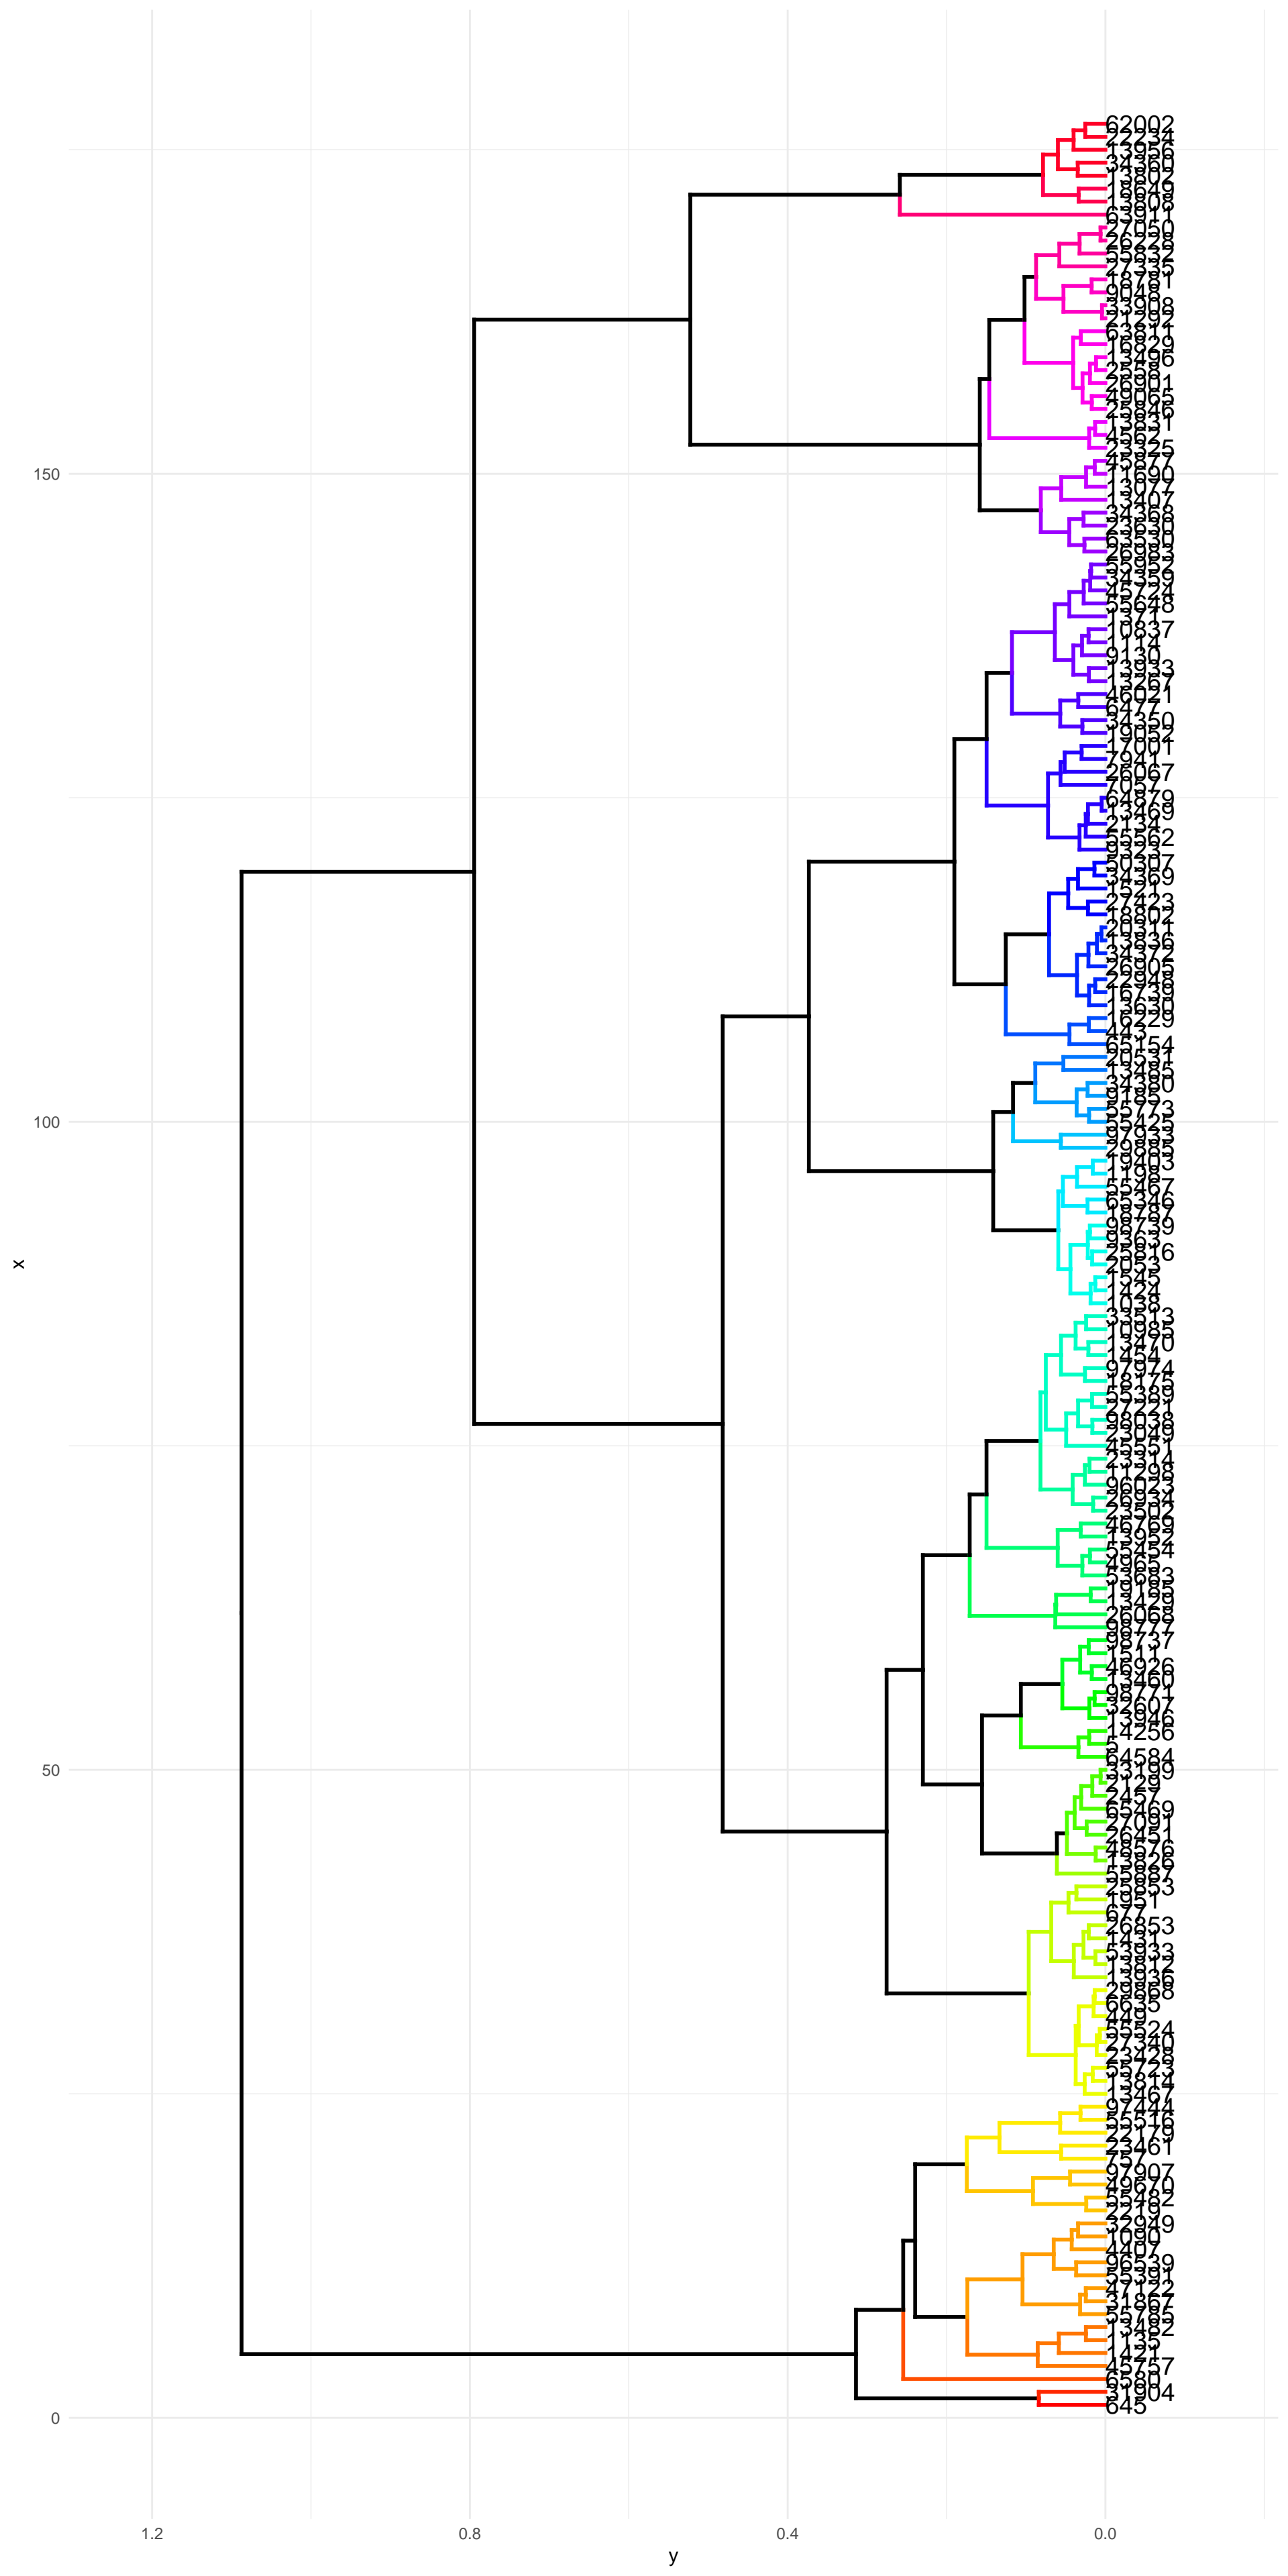

Supplement: s1 [file s1]

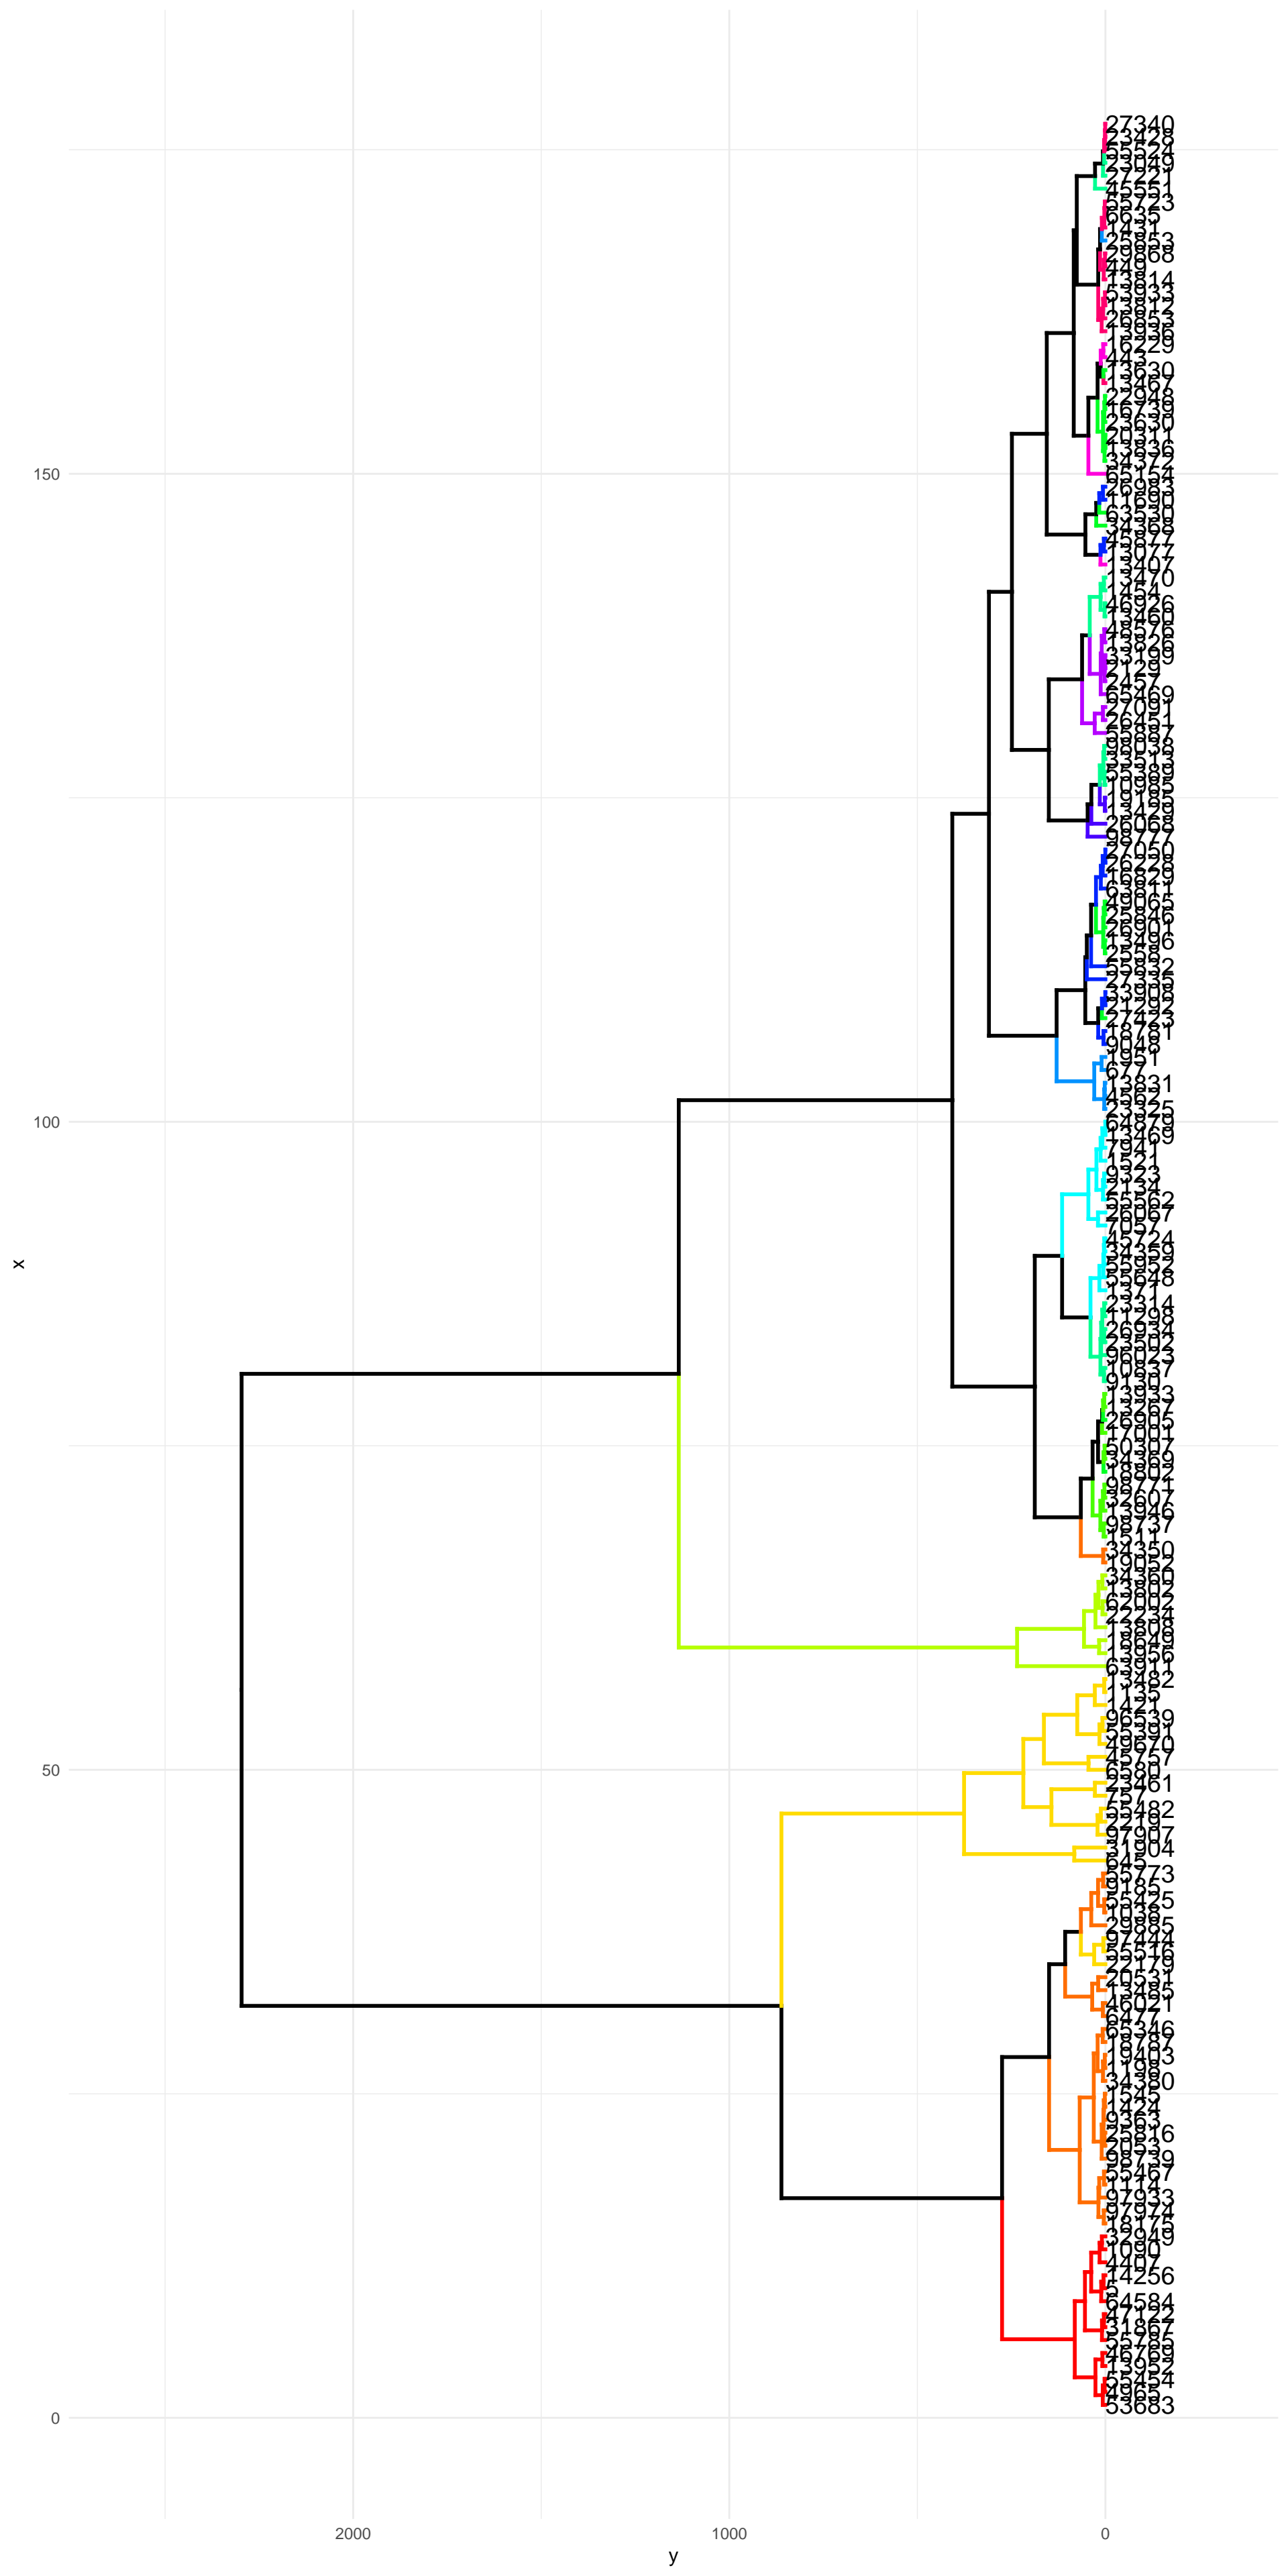

Supplement: s1 [file s1]

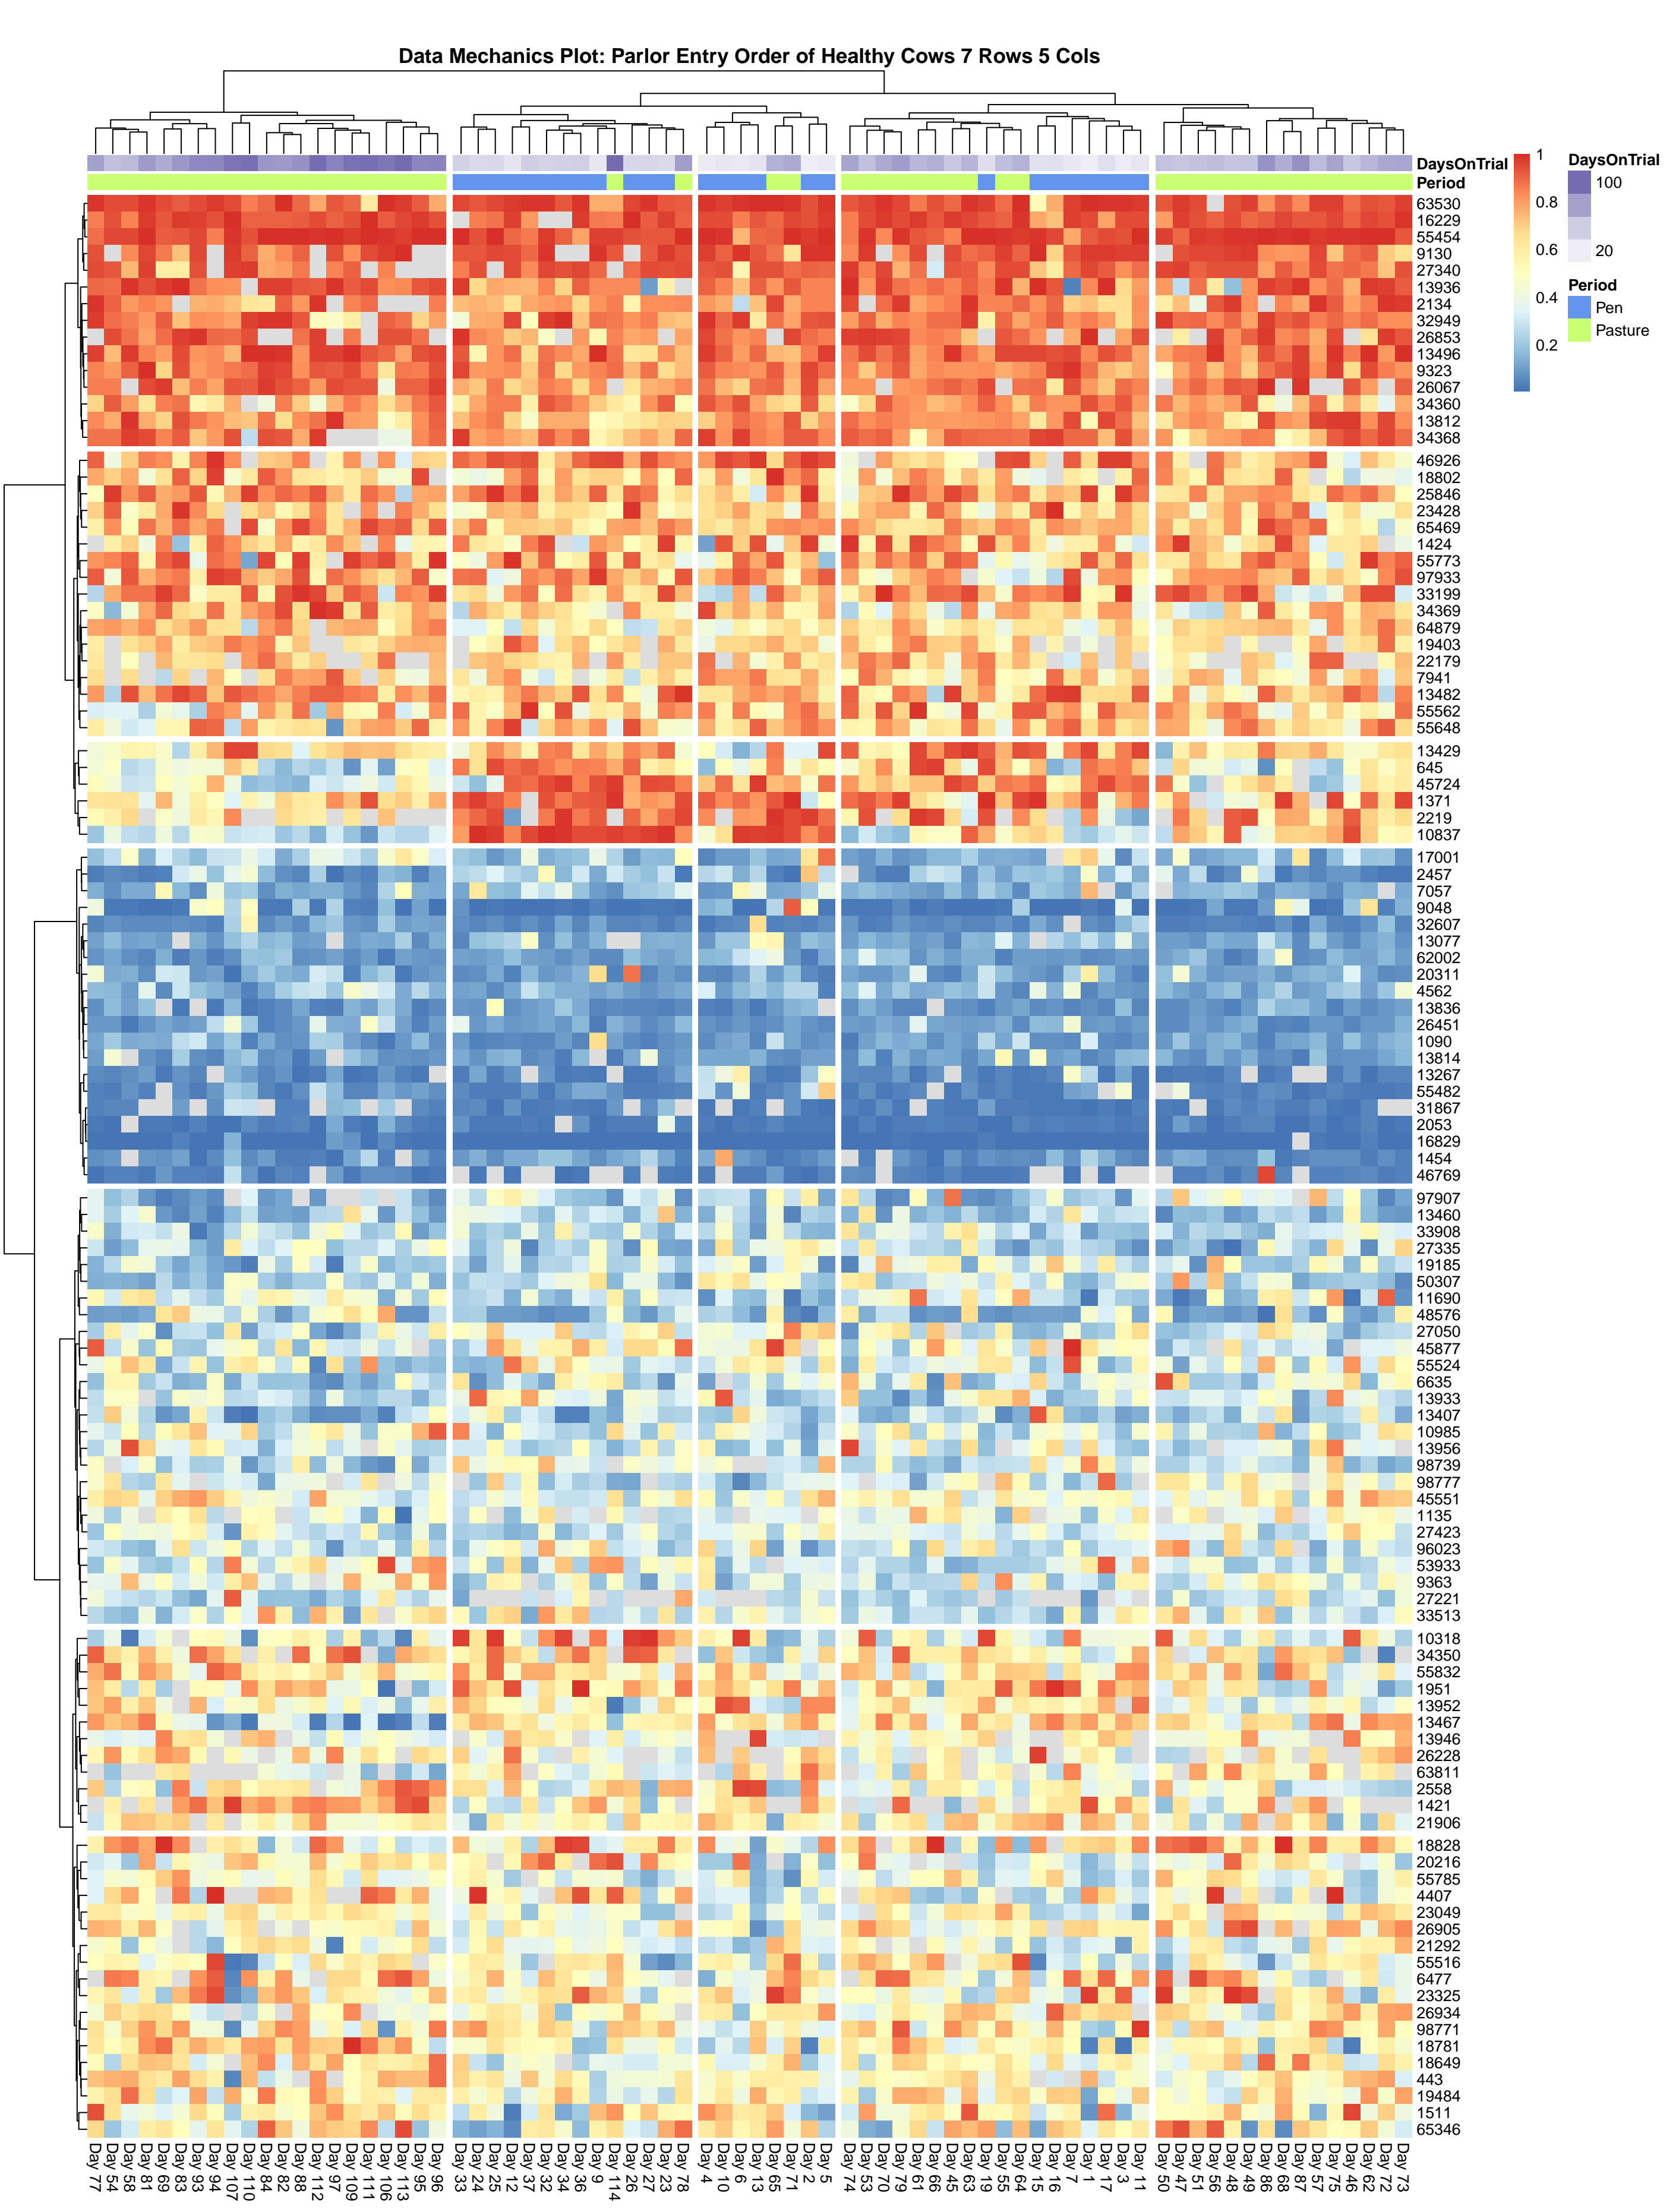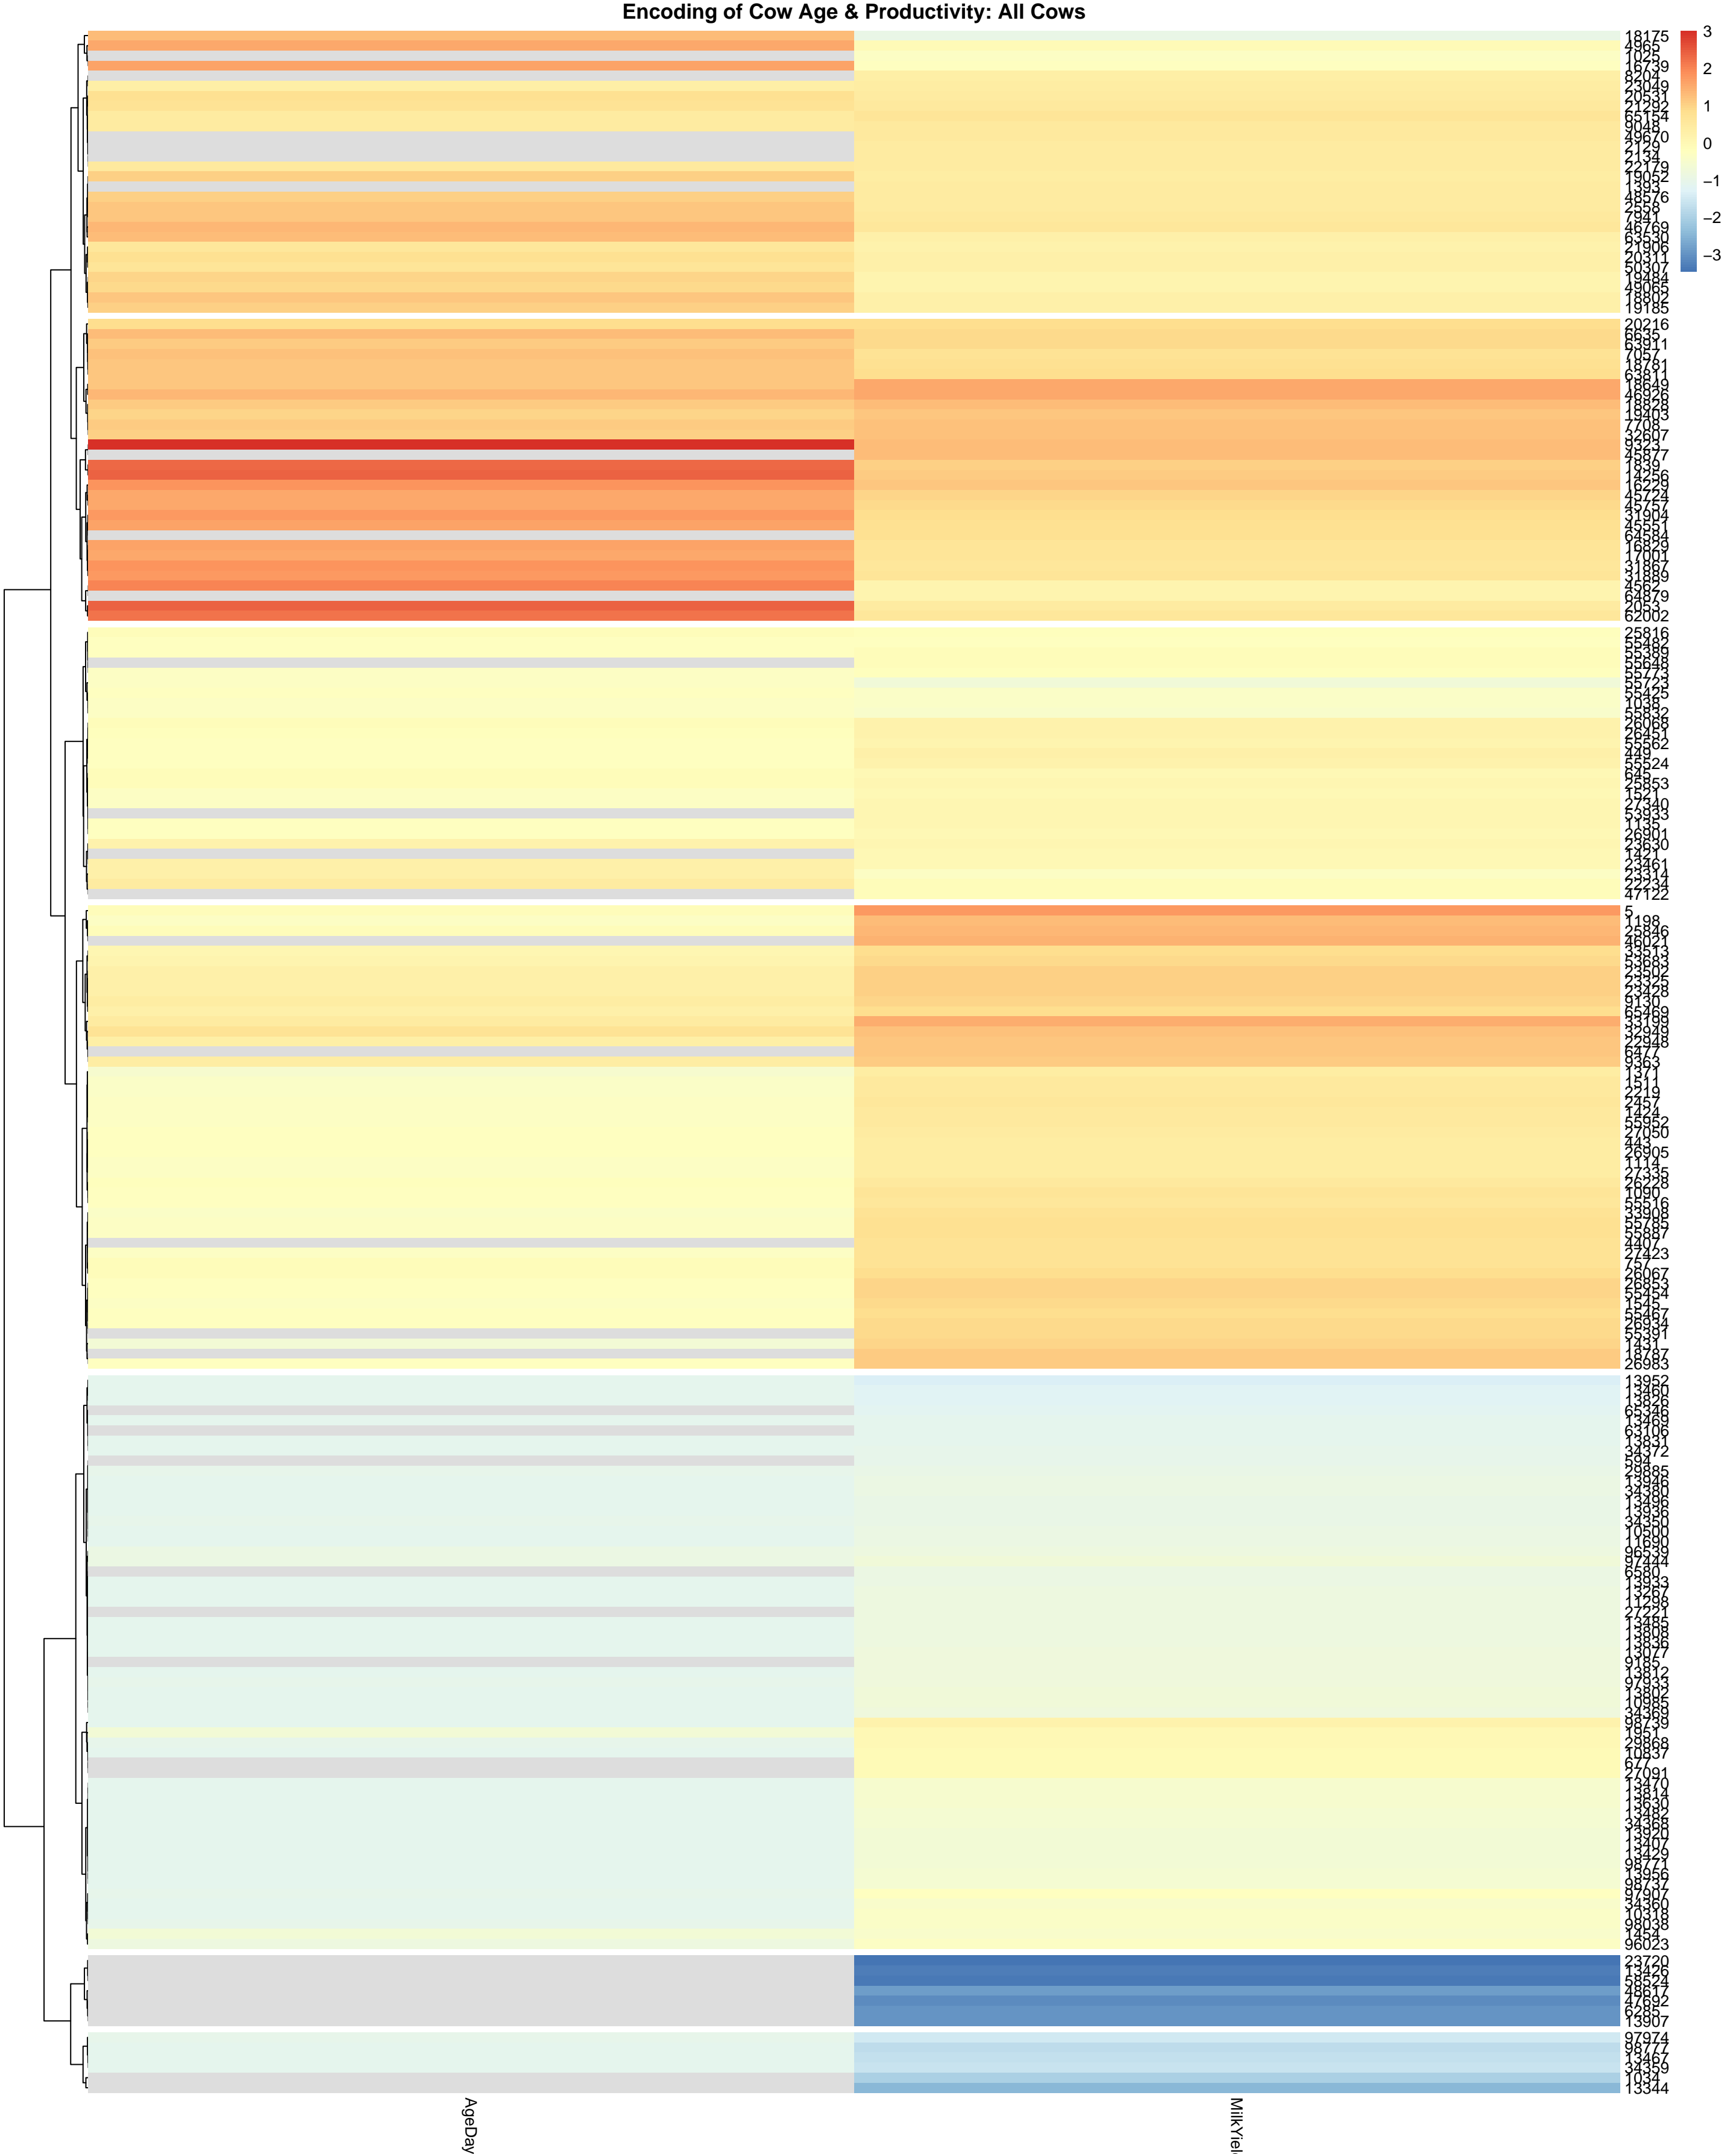

|   |   |   |   |   |    |   |
|---|---|---|---|---|----|---|
| 1 | 2 | 2 | 1 | 5 | 5  | 0 |
| 2 | 3 | 3 | 3 | 5 | 3  | 0 |
| 3 | 0 | 1 | 1 | 2 | 2  | 0 |
| 4 | 3 | 8 | 2 | 2 | 5  | 0 |
| 5 | 3 | 3 | 3 | 6 | 10 | 1 |
| 6 | 2 | 1 | 2 | 1 | 5  | 1 |
| 7 | 3 | 4 | 0 | 9 | 2  | 0 |
|   | 1 | 2 | 3 | 4 | 5  | 7 |

PMI

Supplement: s1 [file s1]

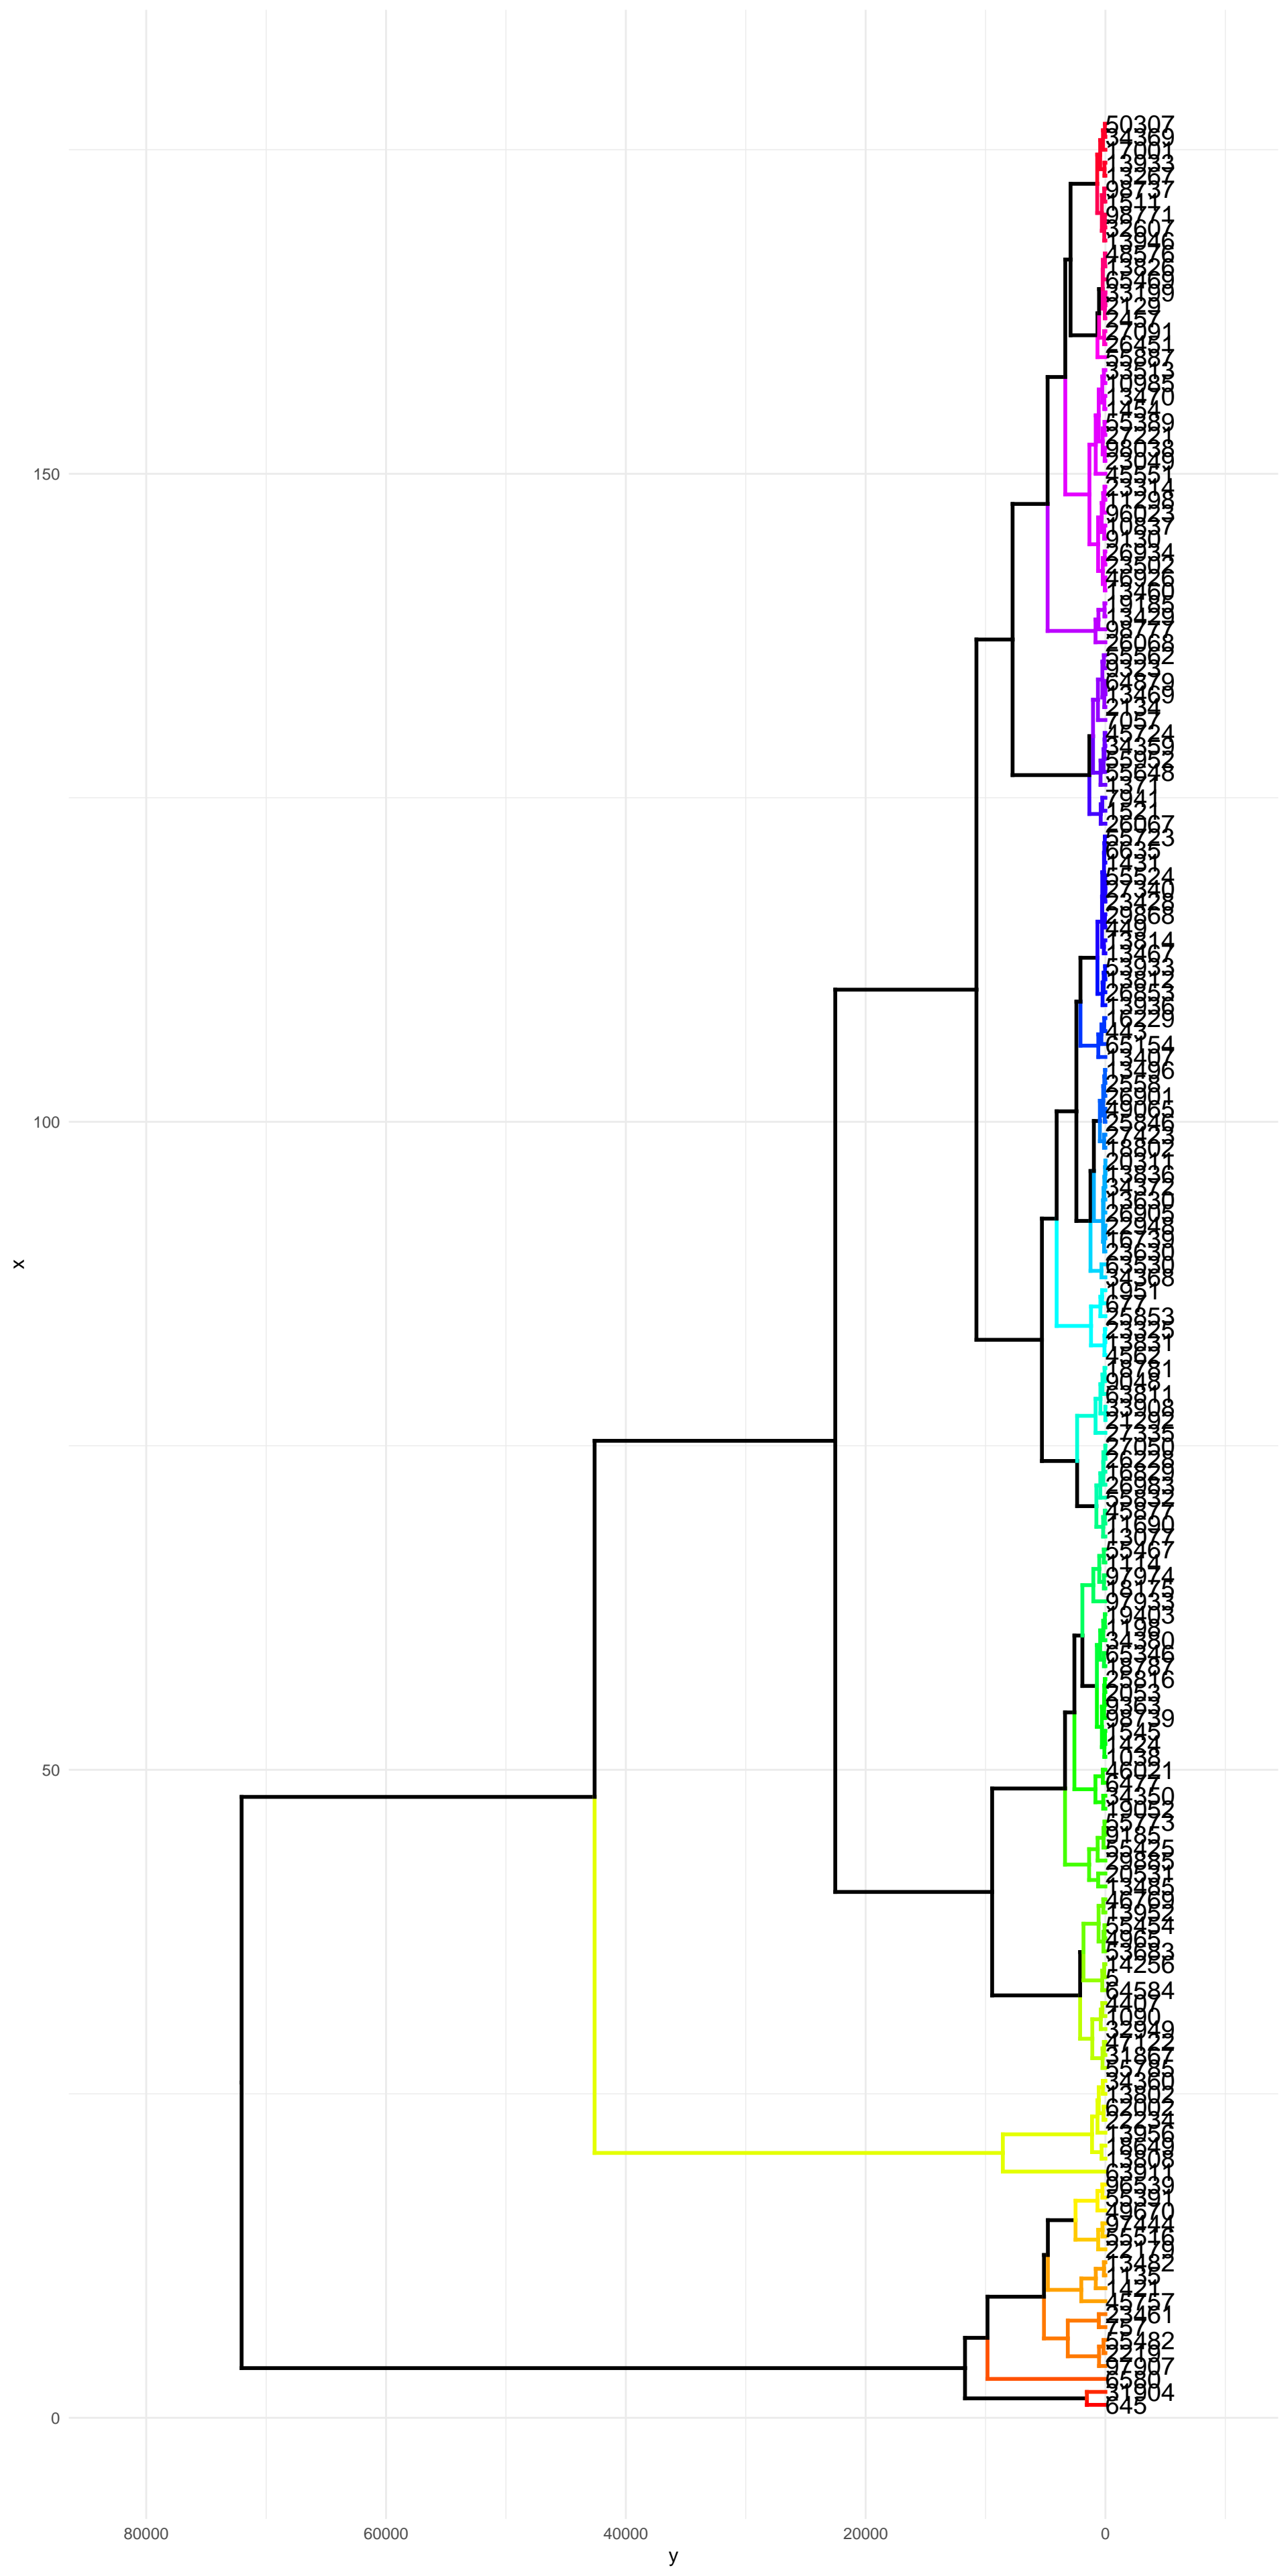

Supplement: s1 [file s1]

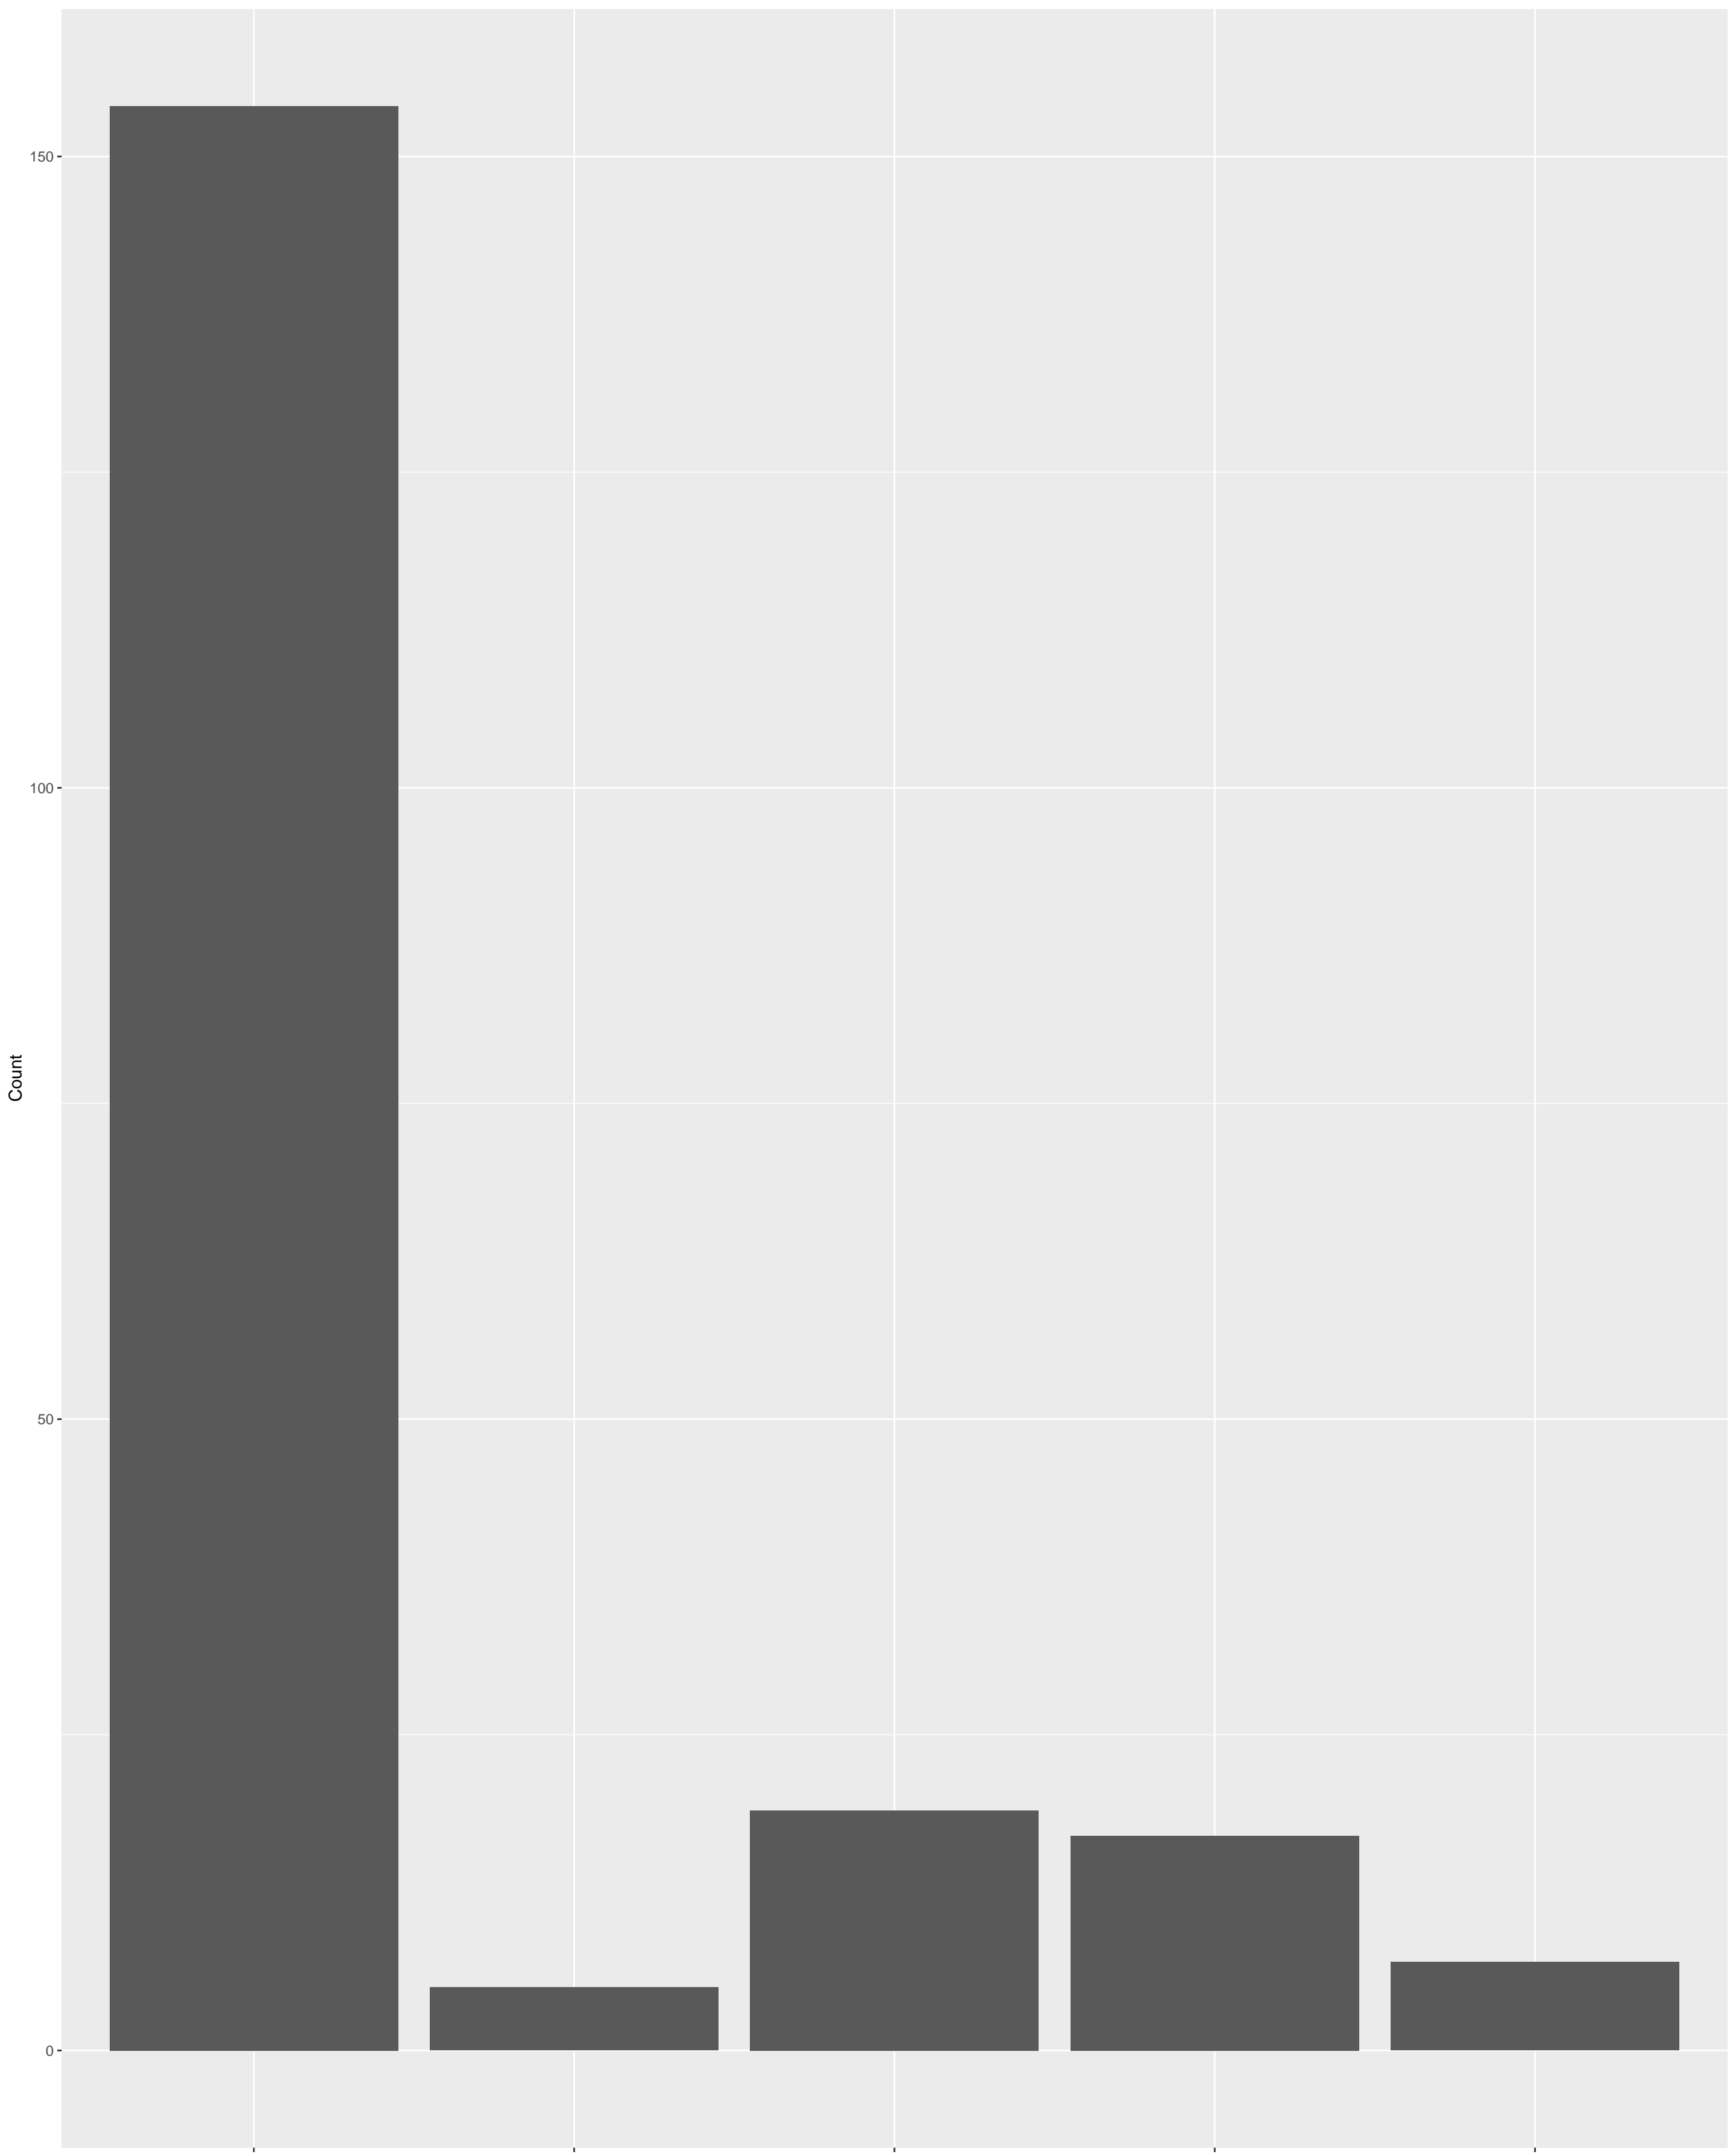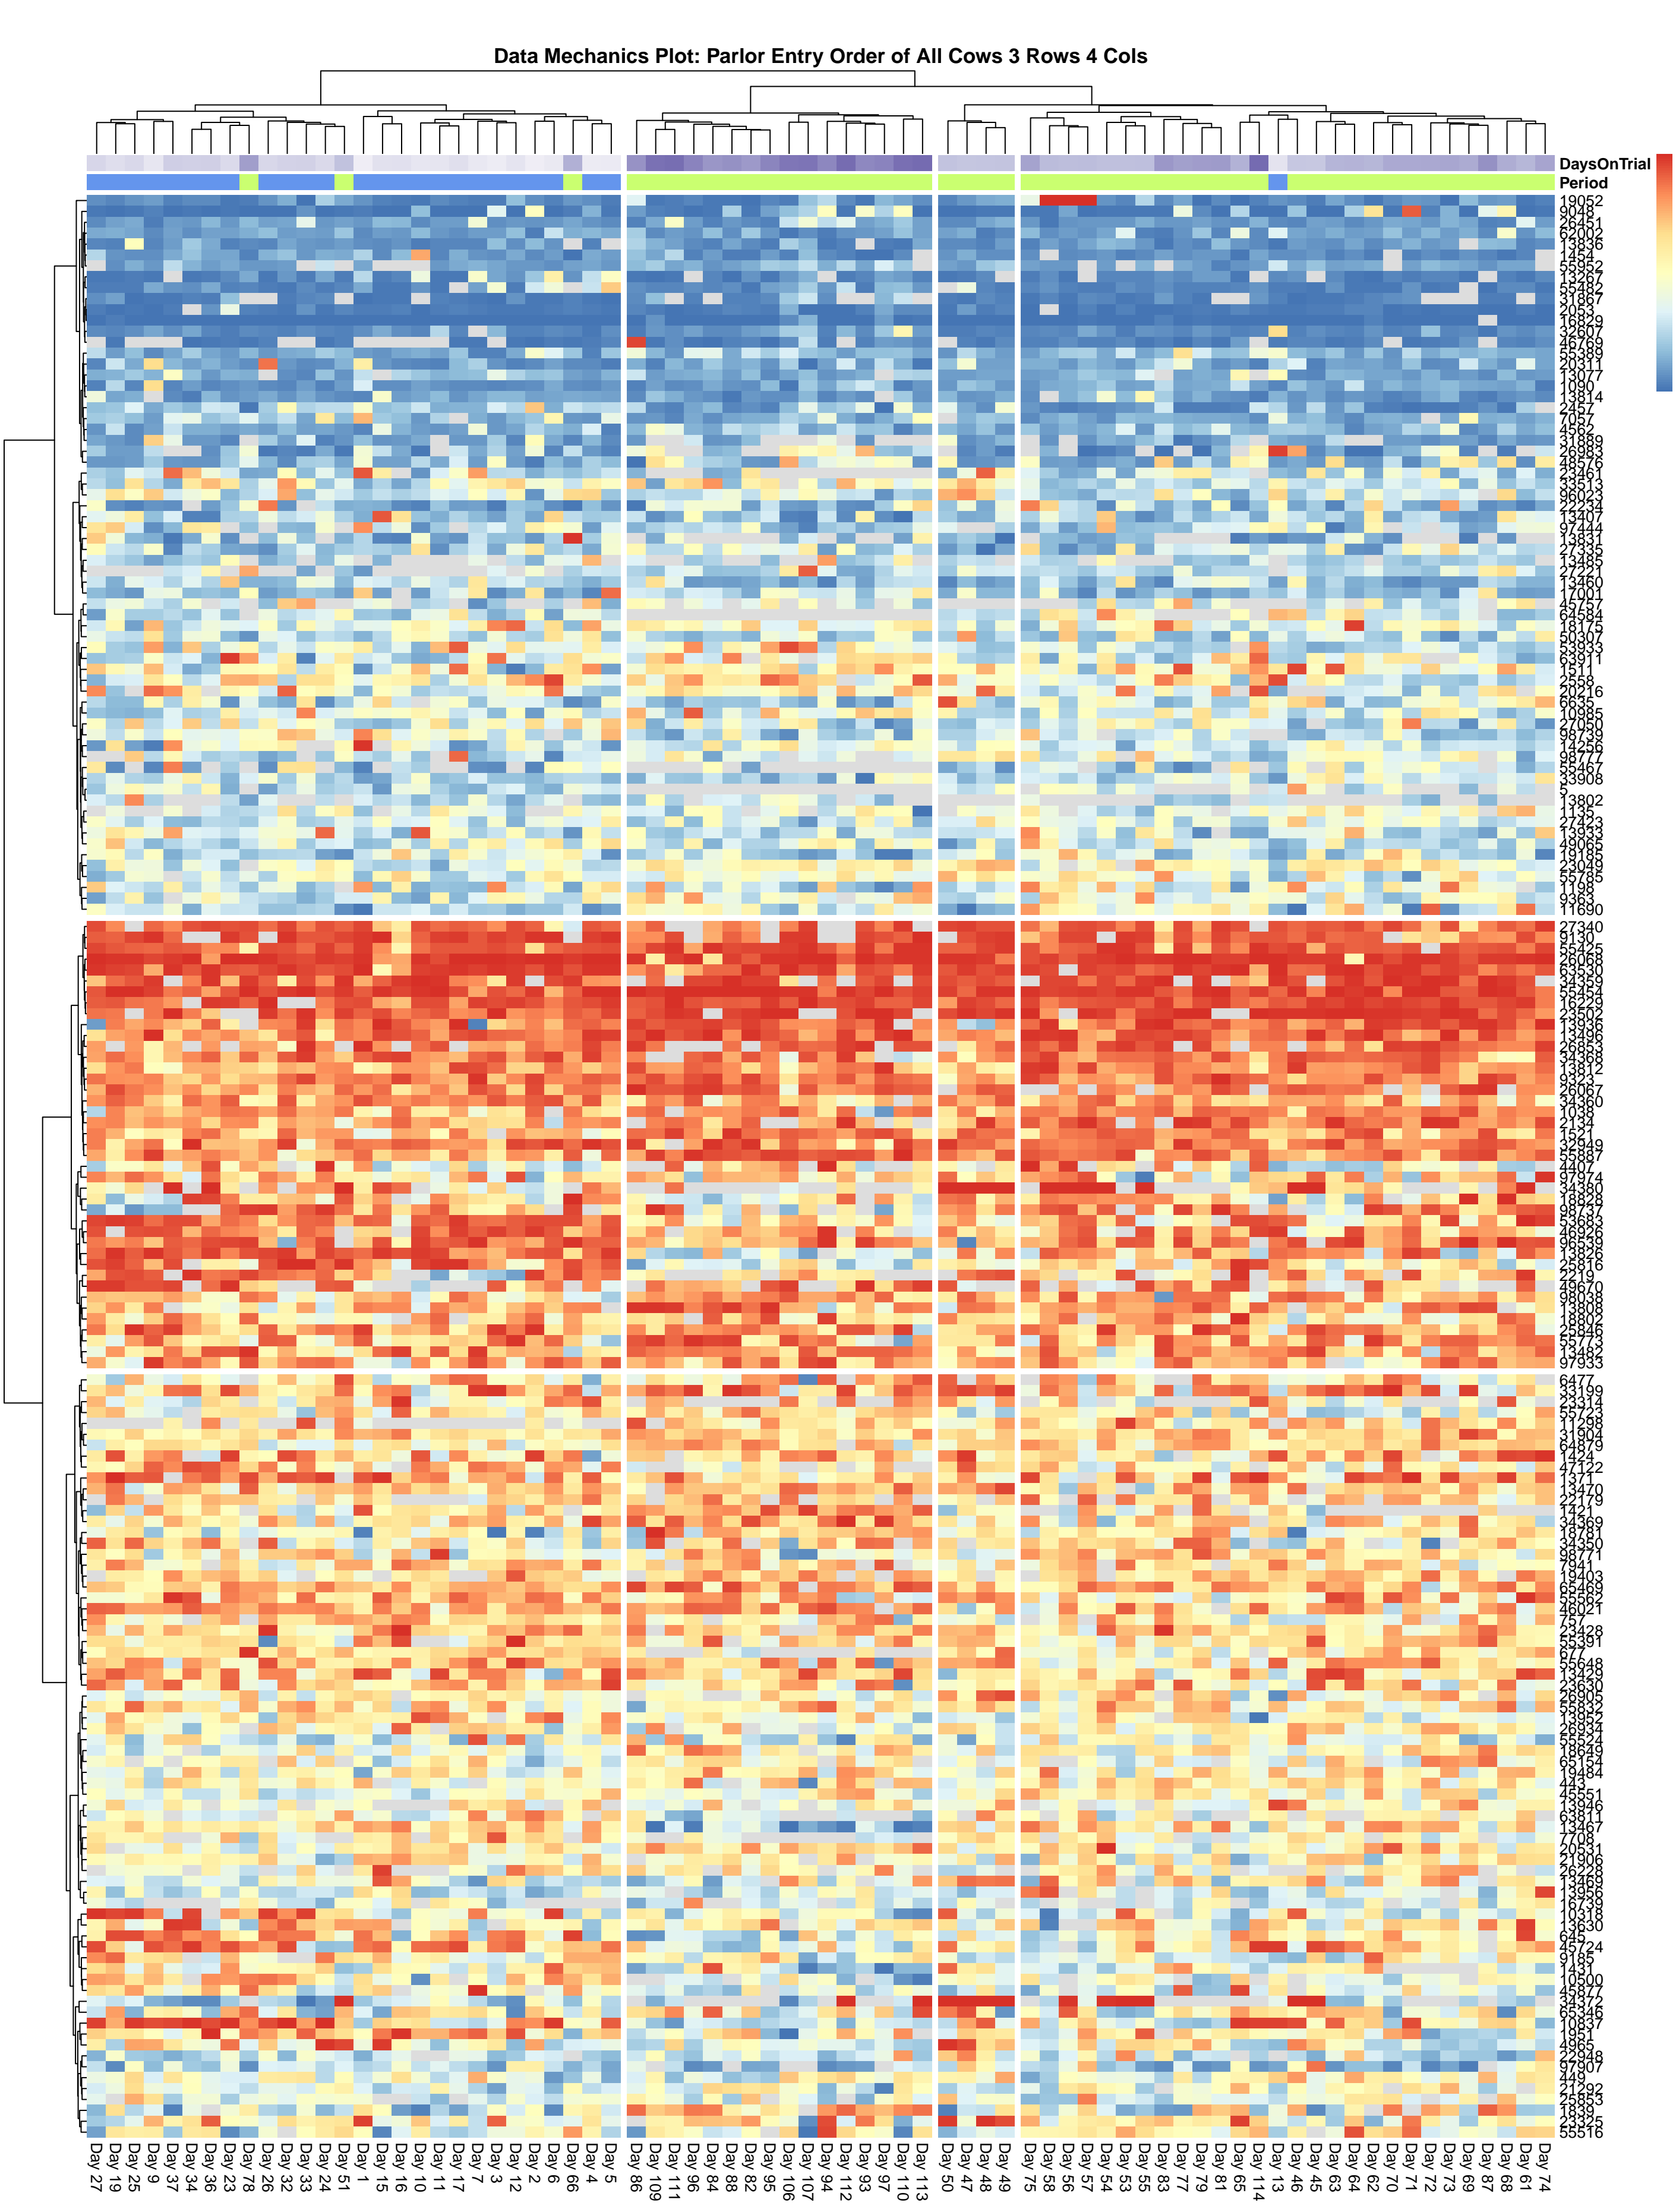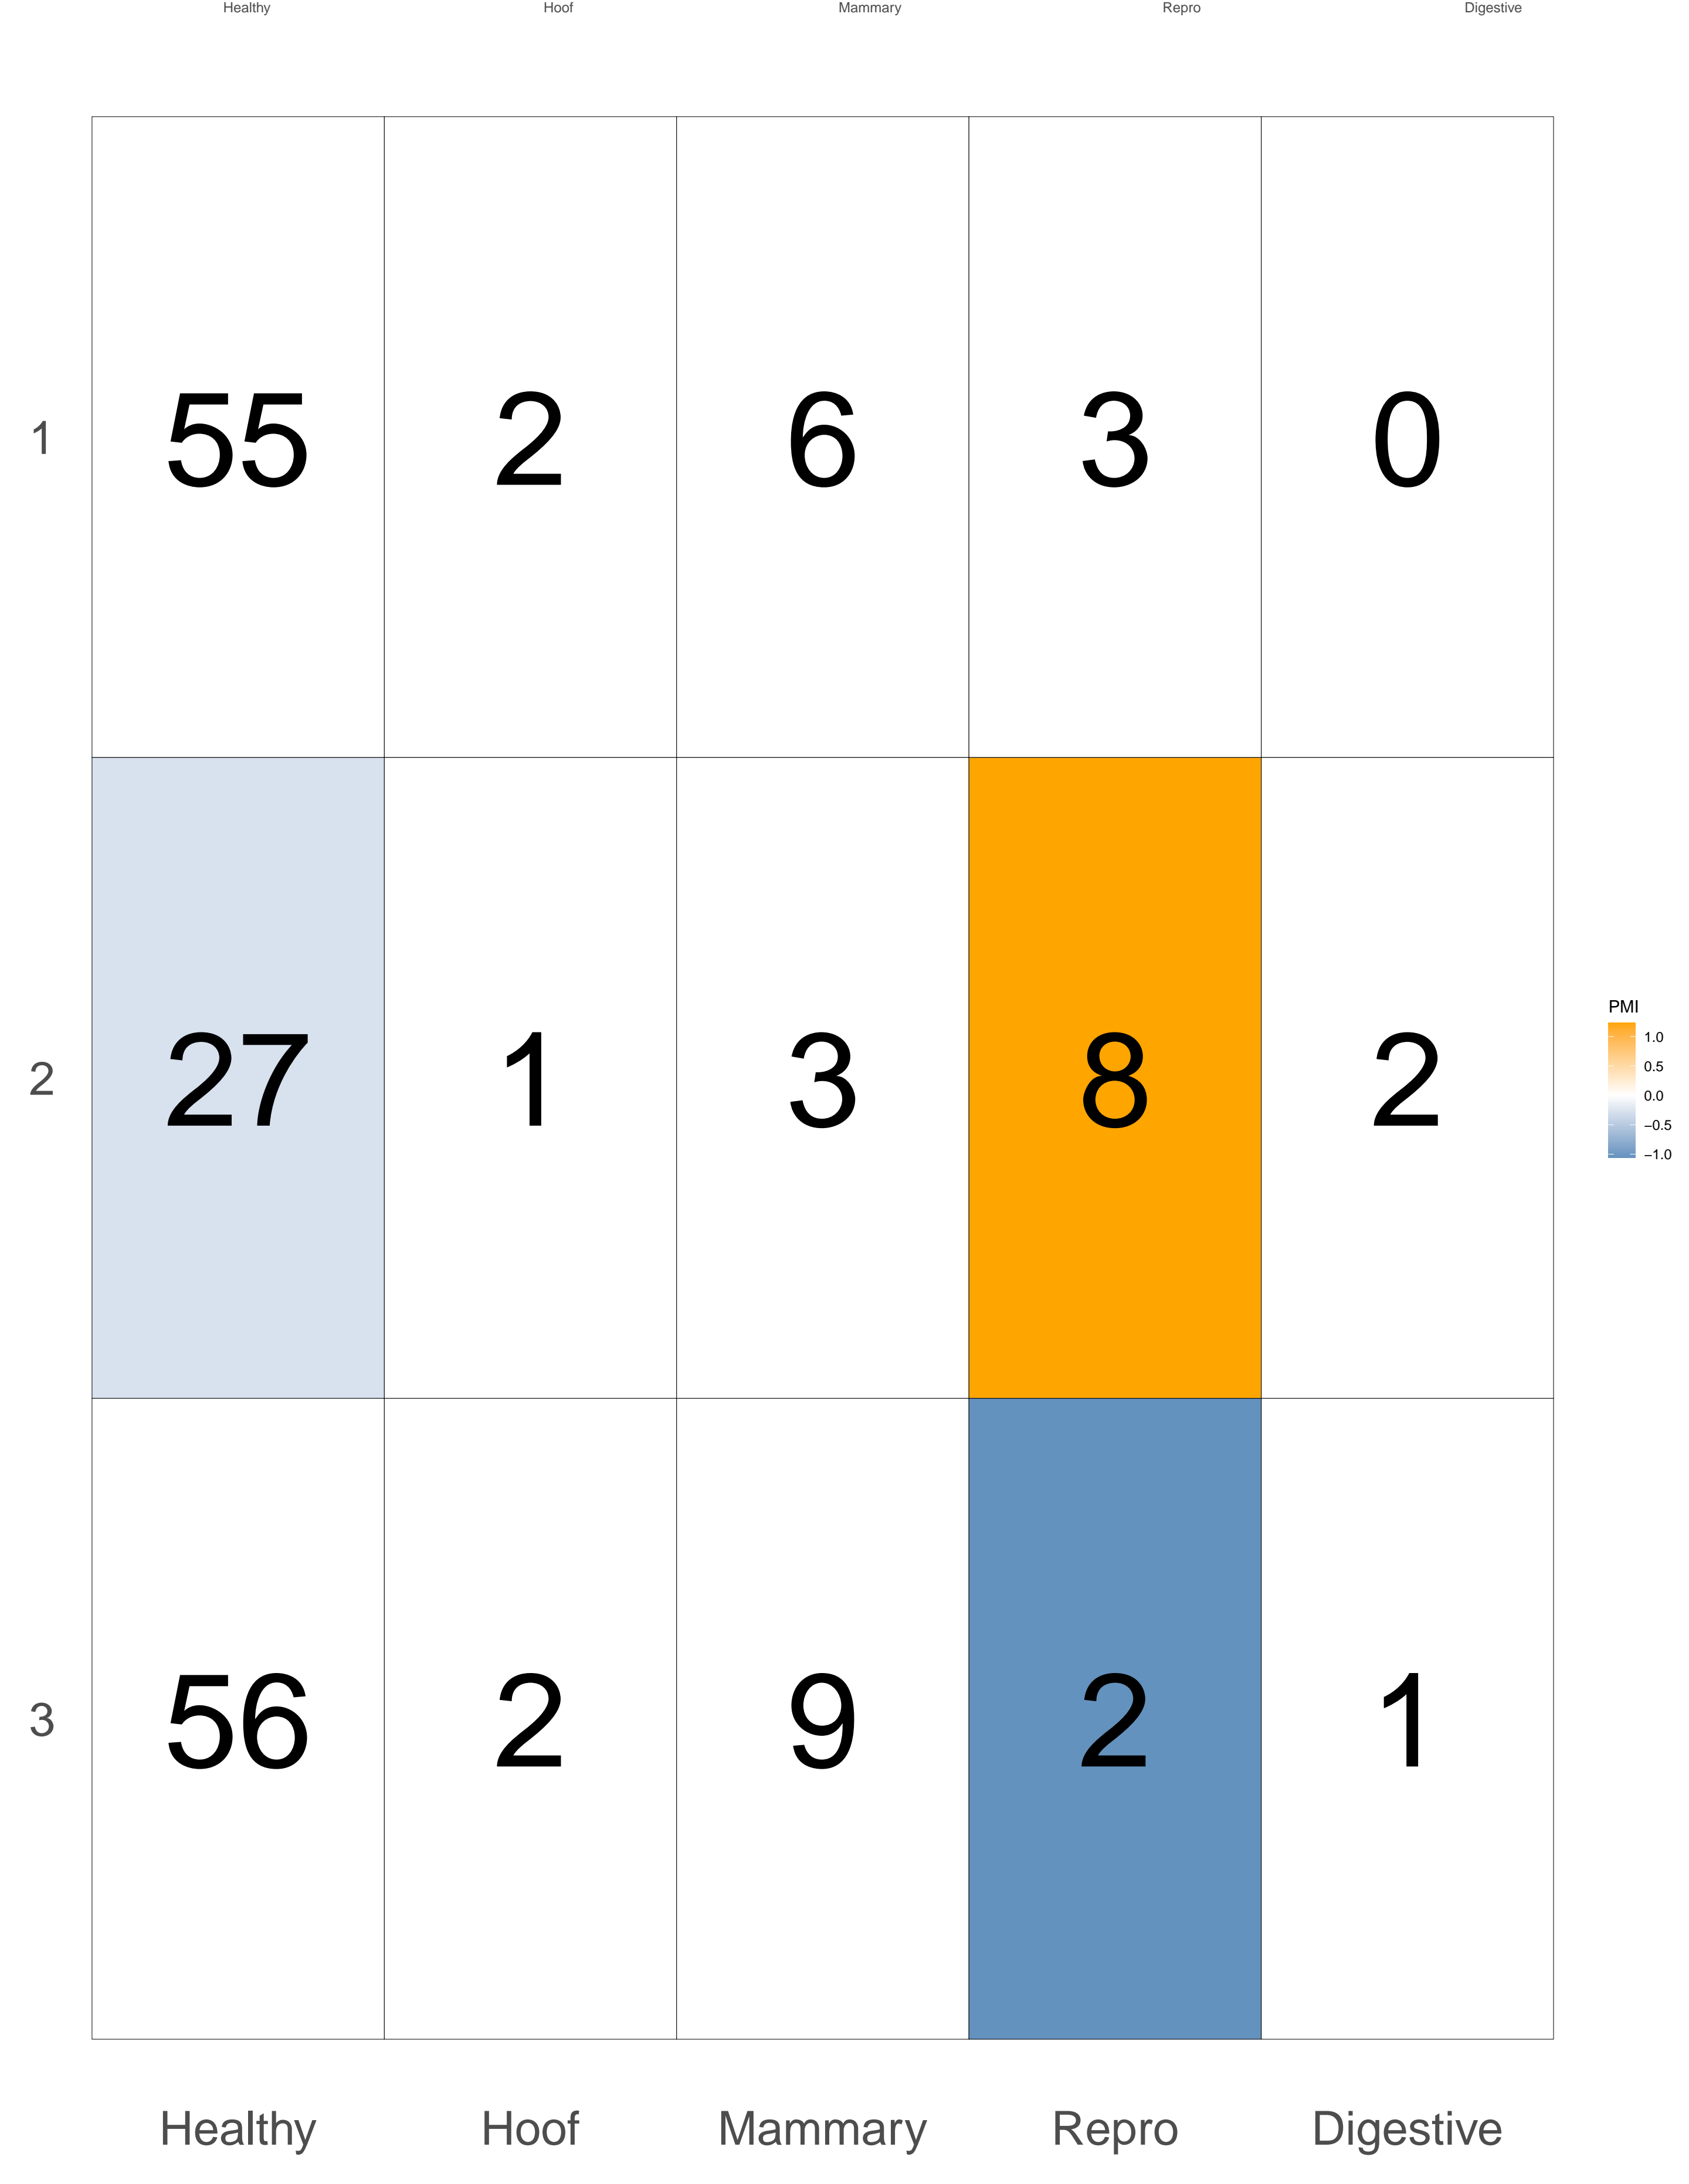

|   | Healthy | Hoof | Mammary | Repro | Digestive |
|---|---------|------|---------|-------|-----------|
| 1 | 55      | 2    | 6       | 3     | 0         |
| 2 | 27      | 1    | 3       | 8     | 2         |
| 3 | 56      | 2    | 9       | 2     | 1         |

Supplement: s1 [file s1]

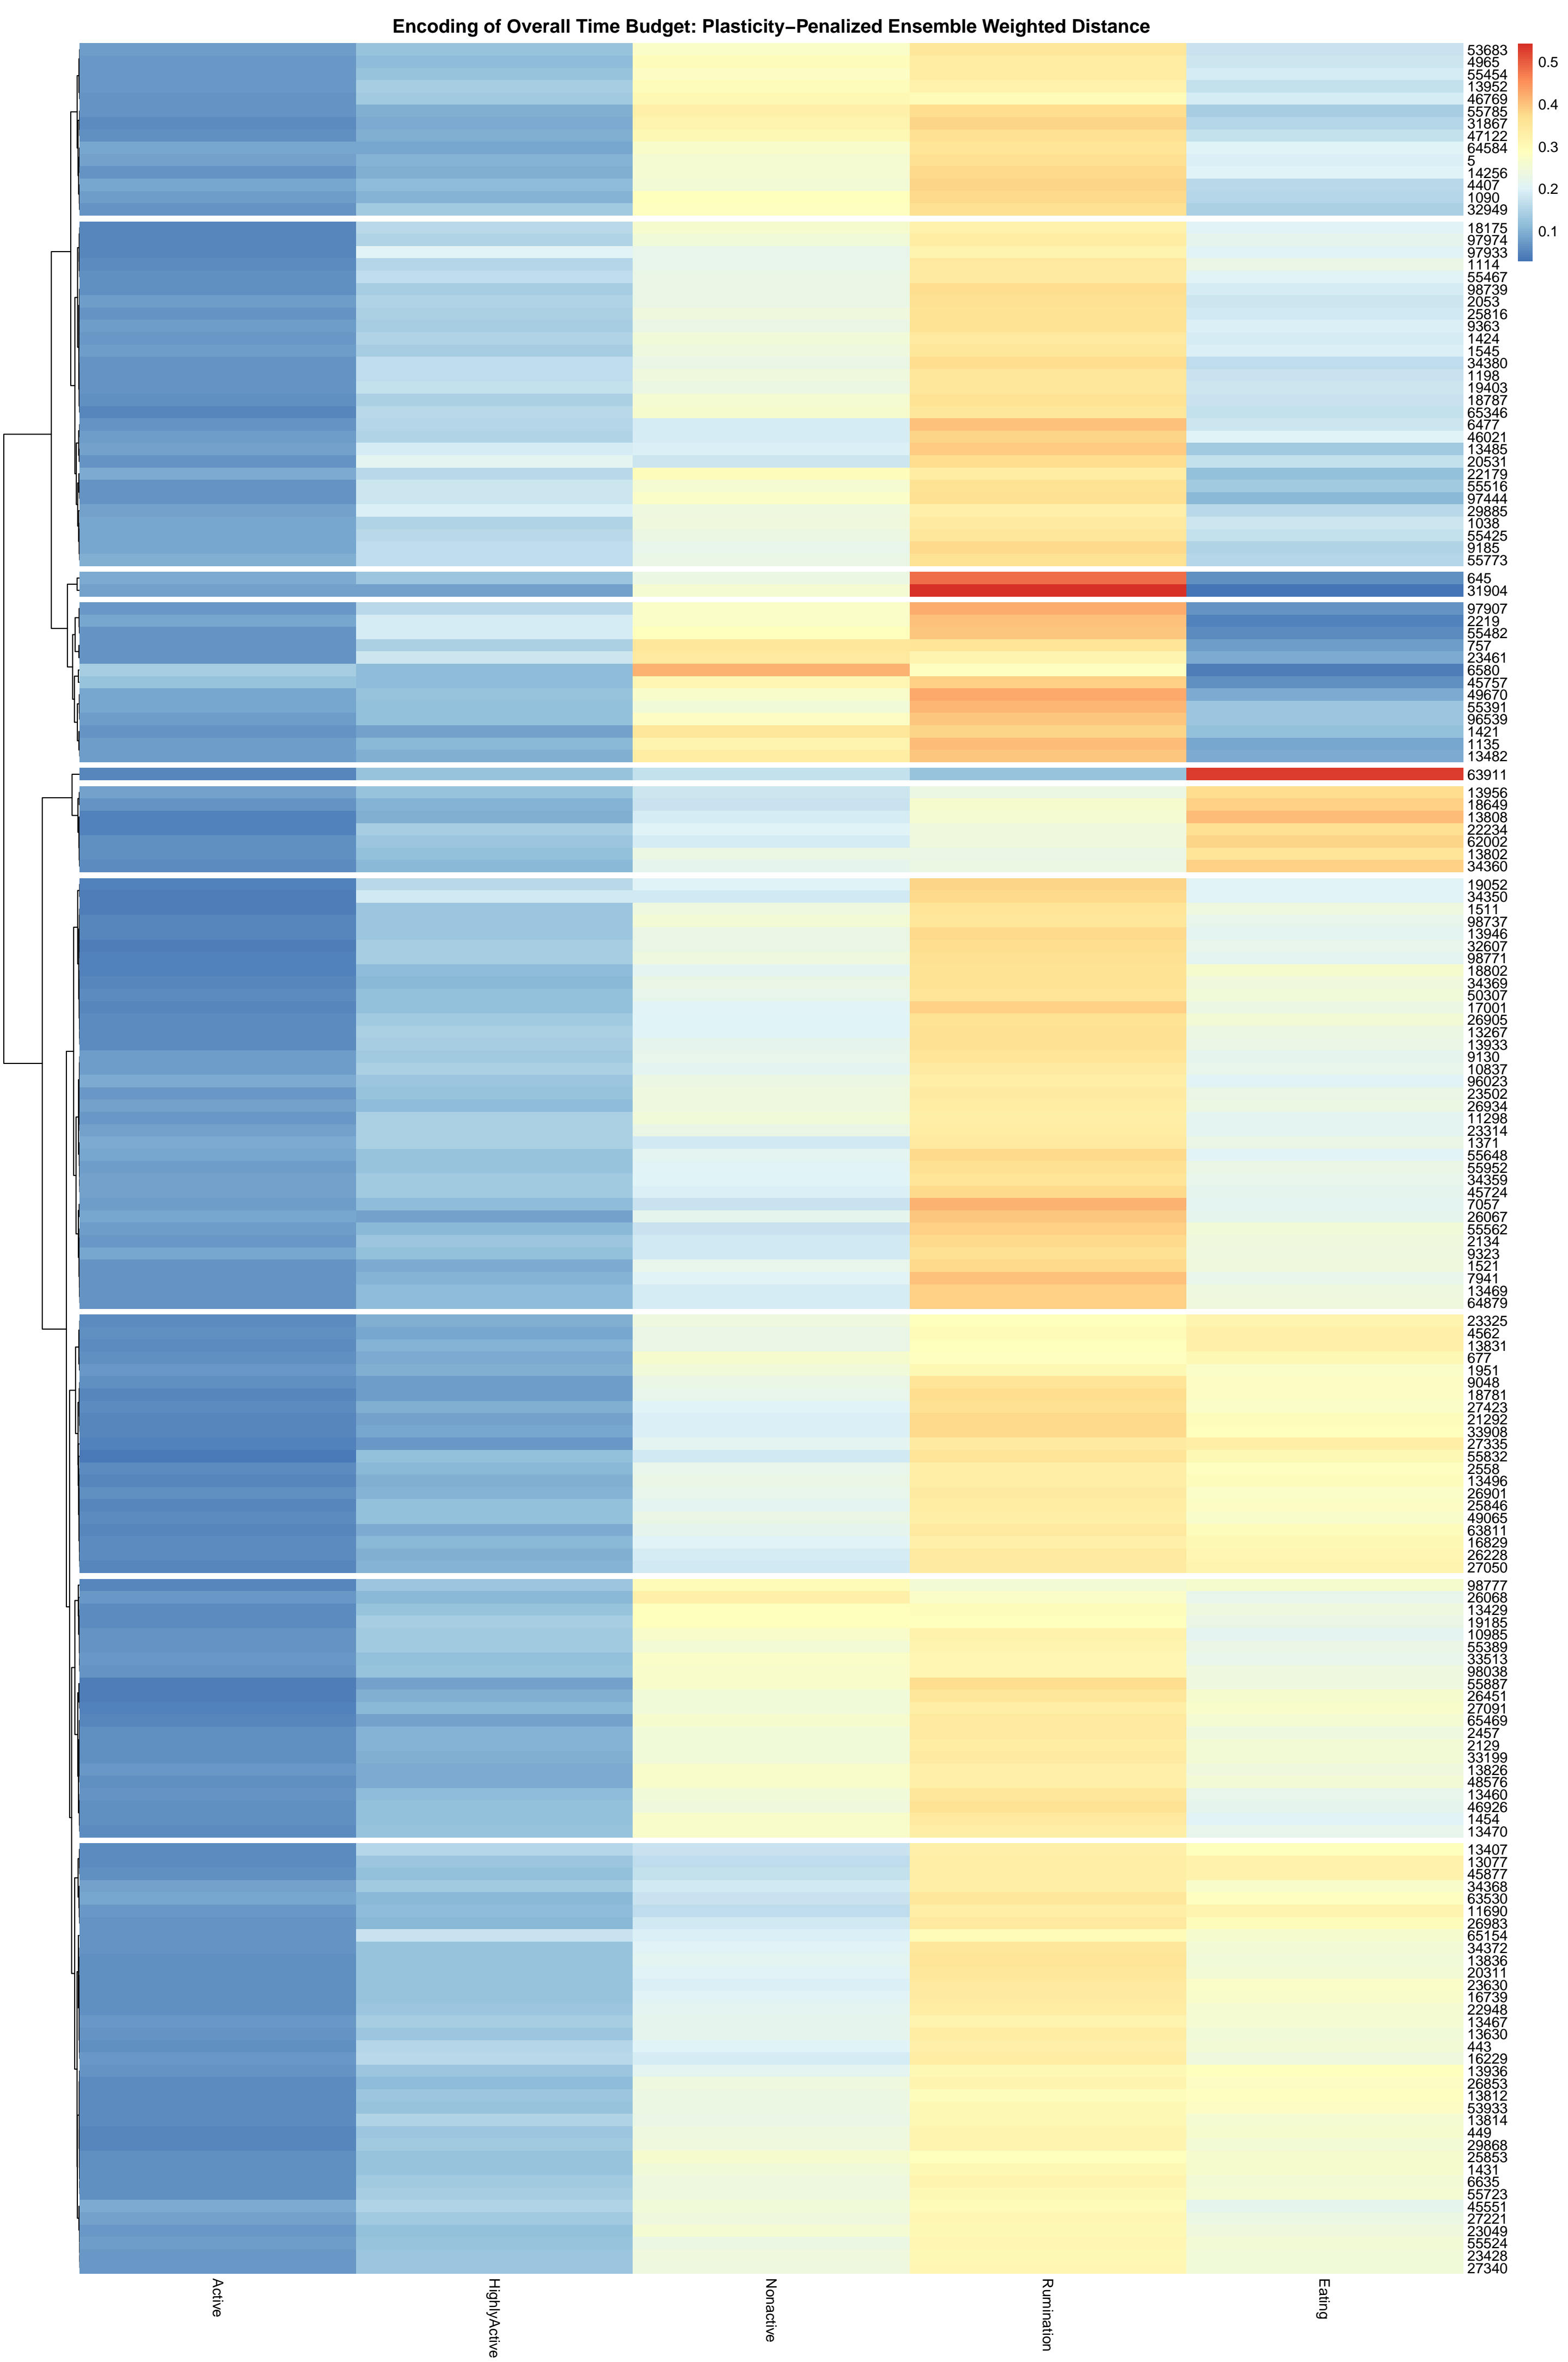

|    |   |   |    |    |    |   |   |   |    |    |
|----|---|---|----|----|----|---|---|---|----|----|
| 1  | 0 | 0 | 0  | 3  | 0  | 0 | 0 | 0 | 0  | 11 |
| 2  | 0 | 0 | 0  | 0  | 4  | 0 | 0 | 0 | 24 | 0  |
| 3  | 0 | 0 | 0  | 0  | 0  | 2 | 0 | 0 | 0  | 0  |
| 4  | 0 | 0 | 0  | 0  | 0  | 0 | 2 | 5 | 0  | 6  |
| 5  | 1 | 0 | 0  | 0  | 0  | 0 | 0 | 0 | 0  | 0  |
| 6  | 0 | 7 | 0  | 0  | 0  | 0 | 0 | 0 | 0  | 0  |
| 7  | 0 | 0 | 0  | 14 | 19 | 0 | 0 | 0 | 2  | 0  |
| 8  | 0 | 0 | 21 | 0  | 0  | 0 | 0 | 0 | 0  | 0  |
| 9  | 0 | 0 | 9  | 0  | 12 | 0 | 0 | 0 | 0  | 0  |
| 10 | 0 | 0 | 6  | 2  | 27 | 0 | 0 | 0 | 0  | 0  |
|    | 1 | 2 | 3  | 4  | 5  | 6 | 7 | 8 | 9  | 10 |

Supplement: s1 [file s1]

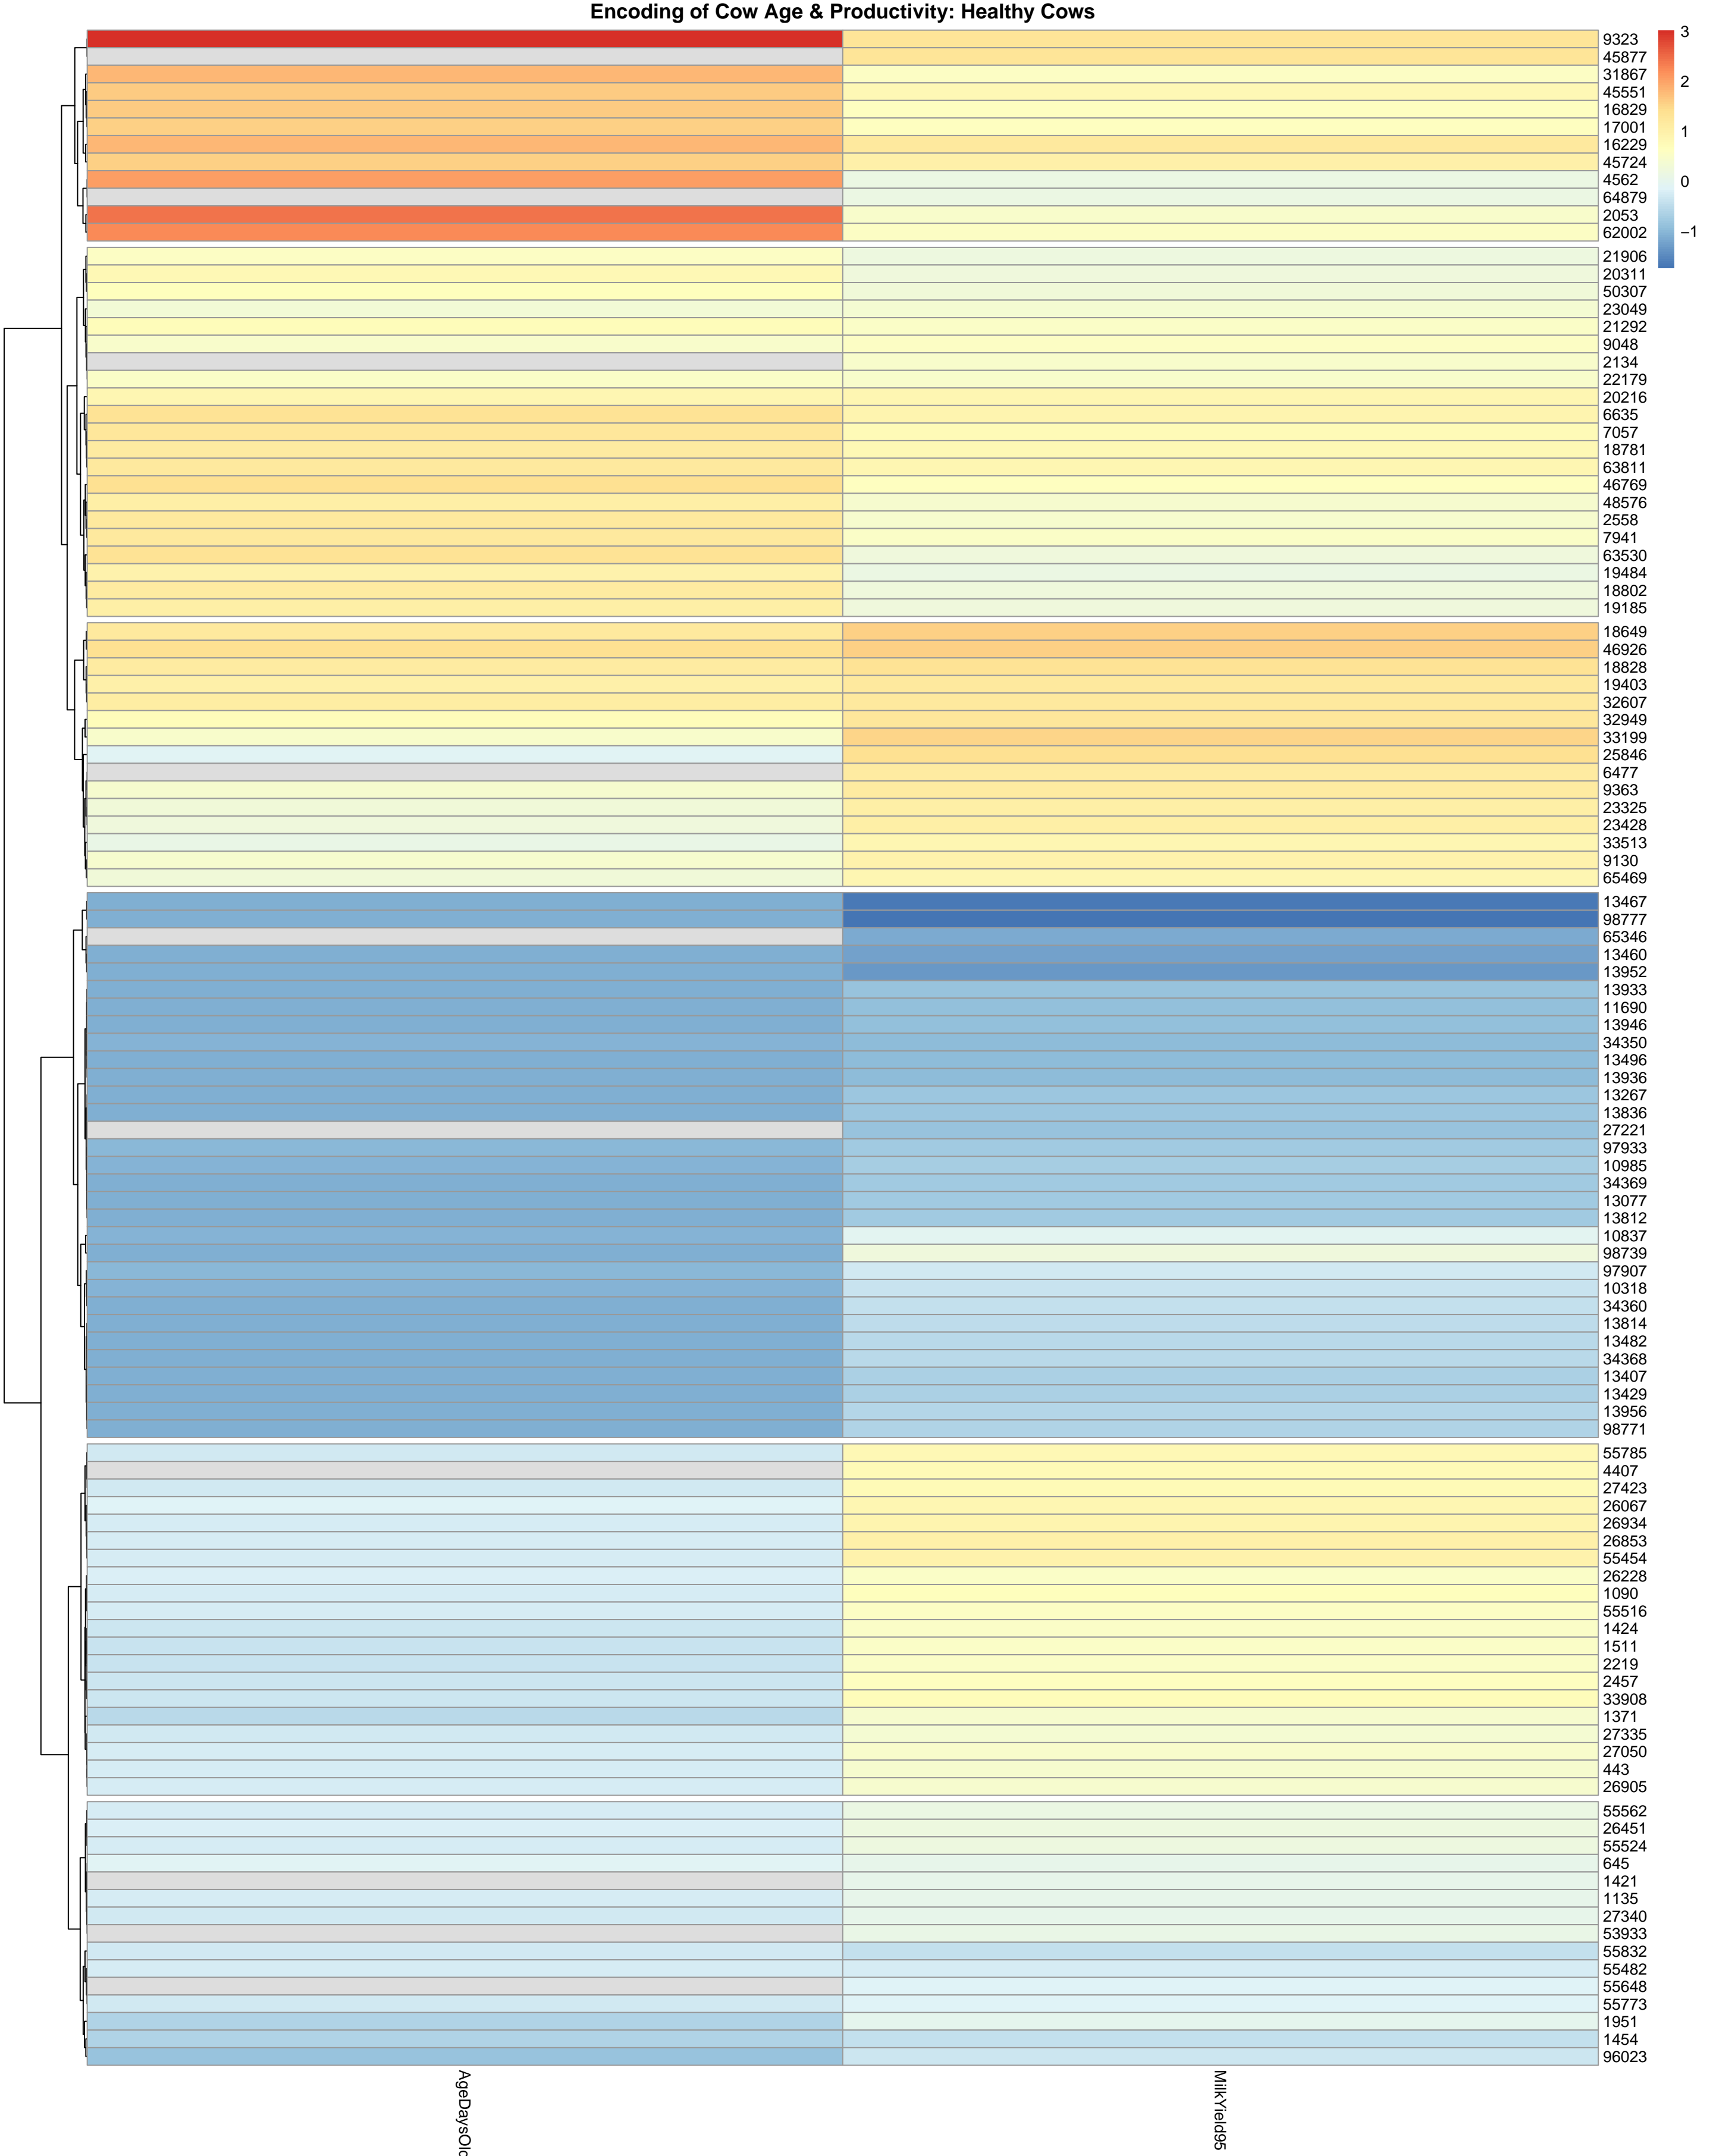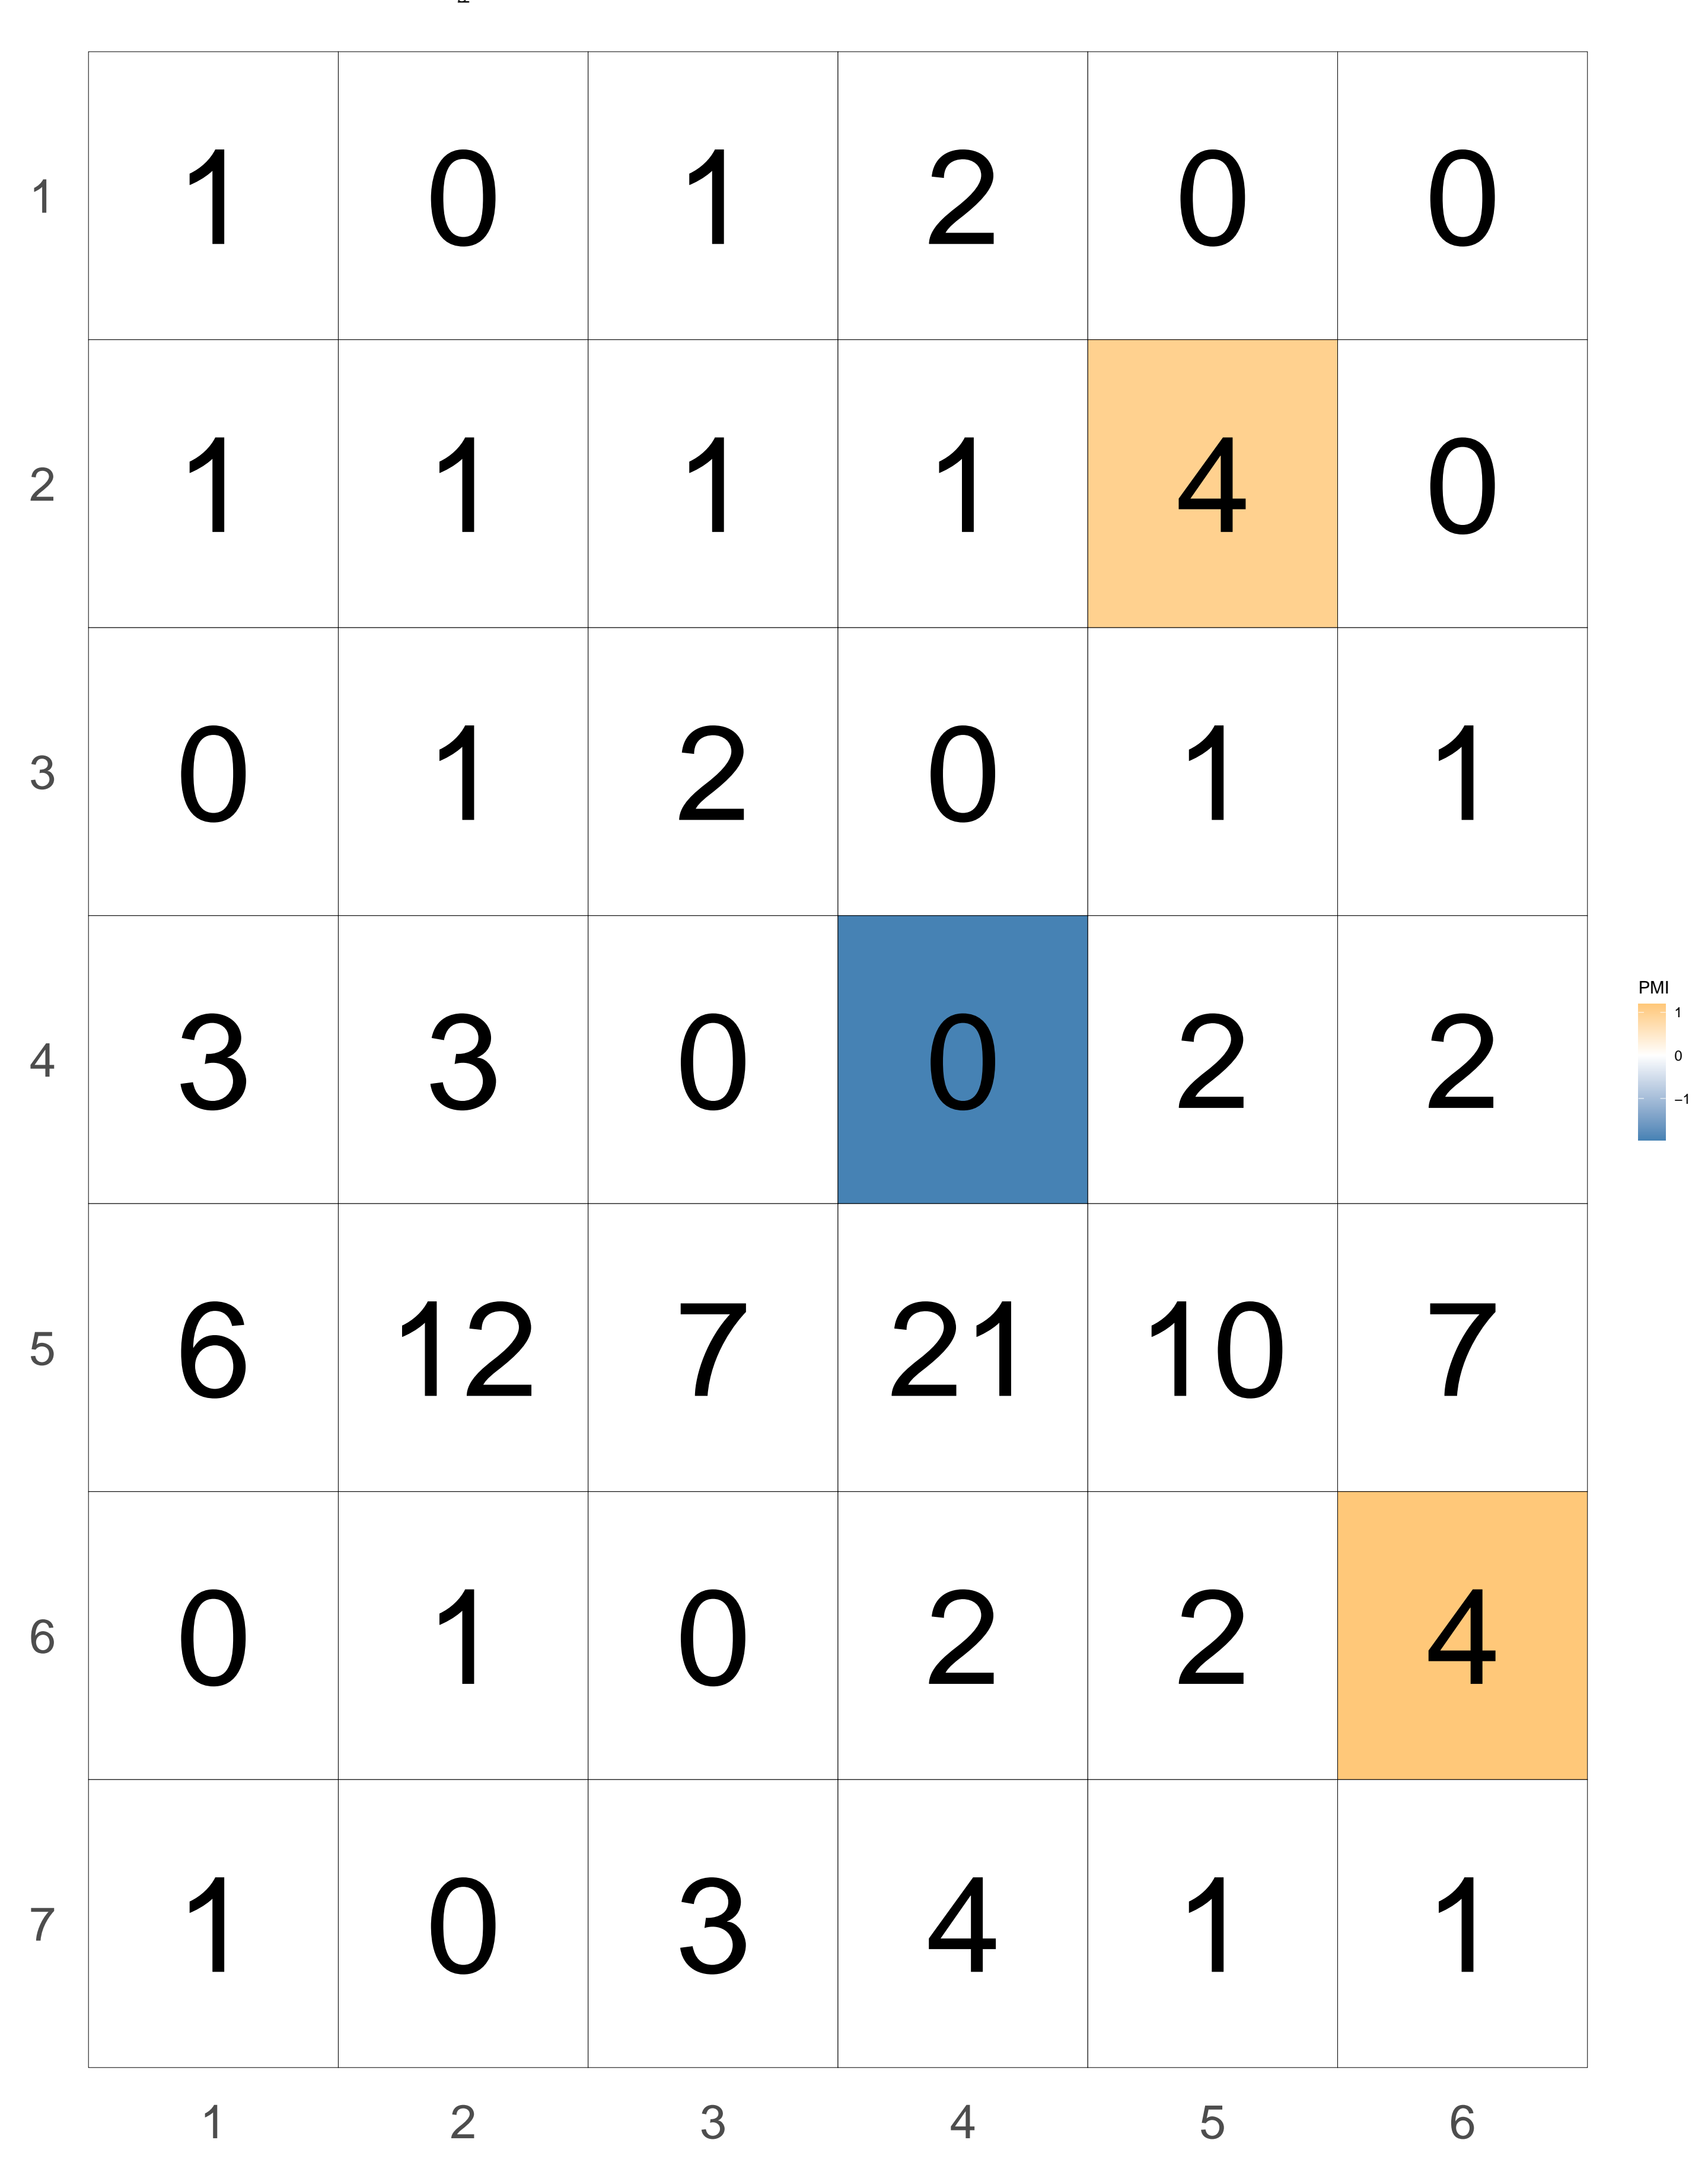

Supplement: s1 [file s1]

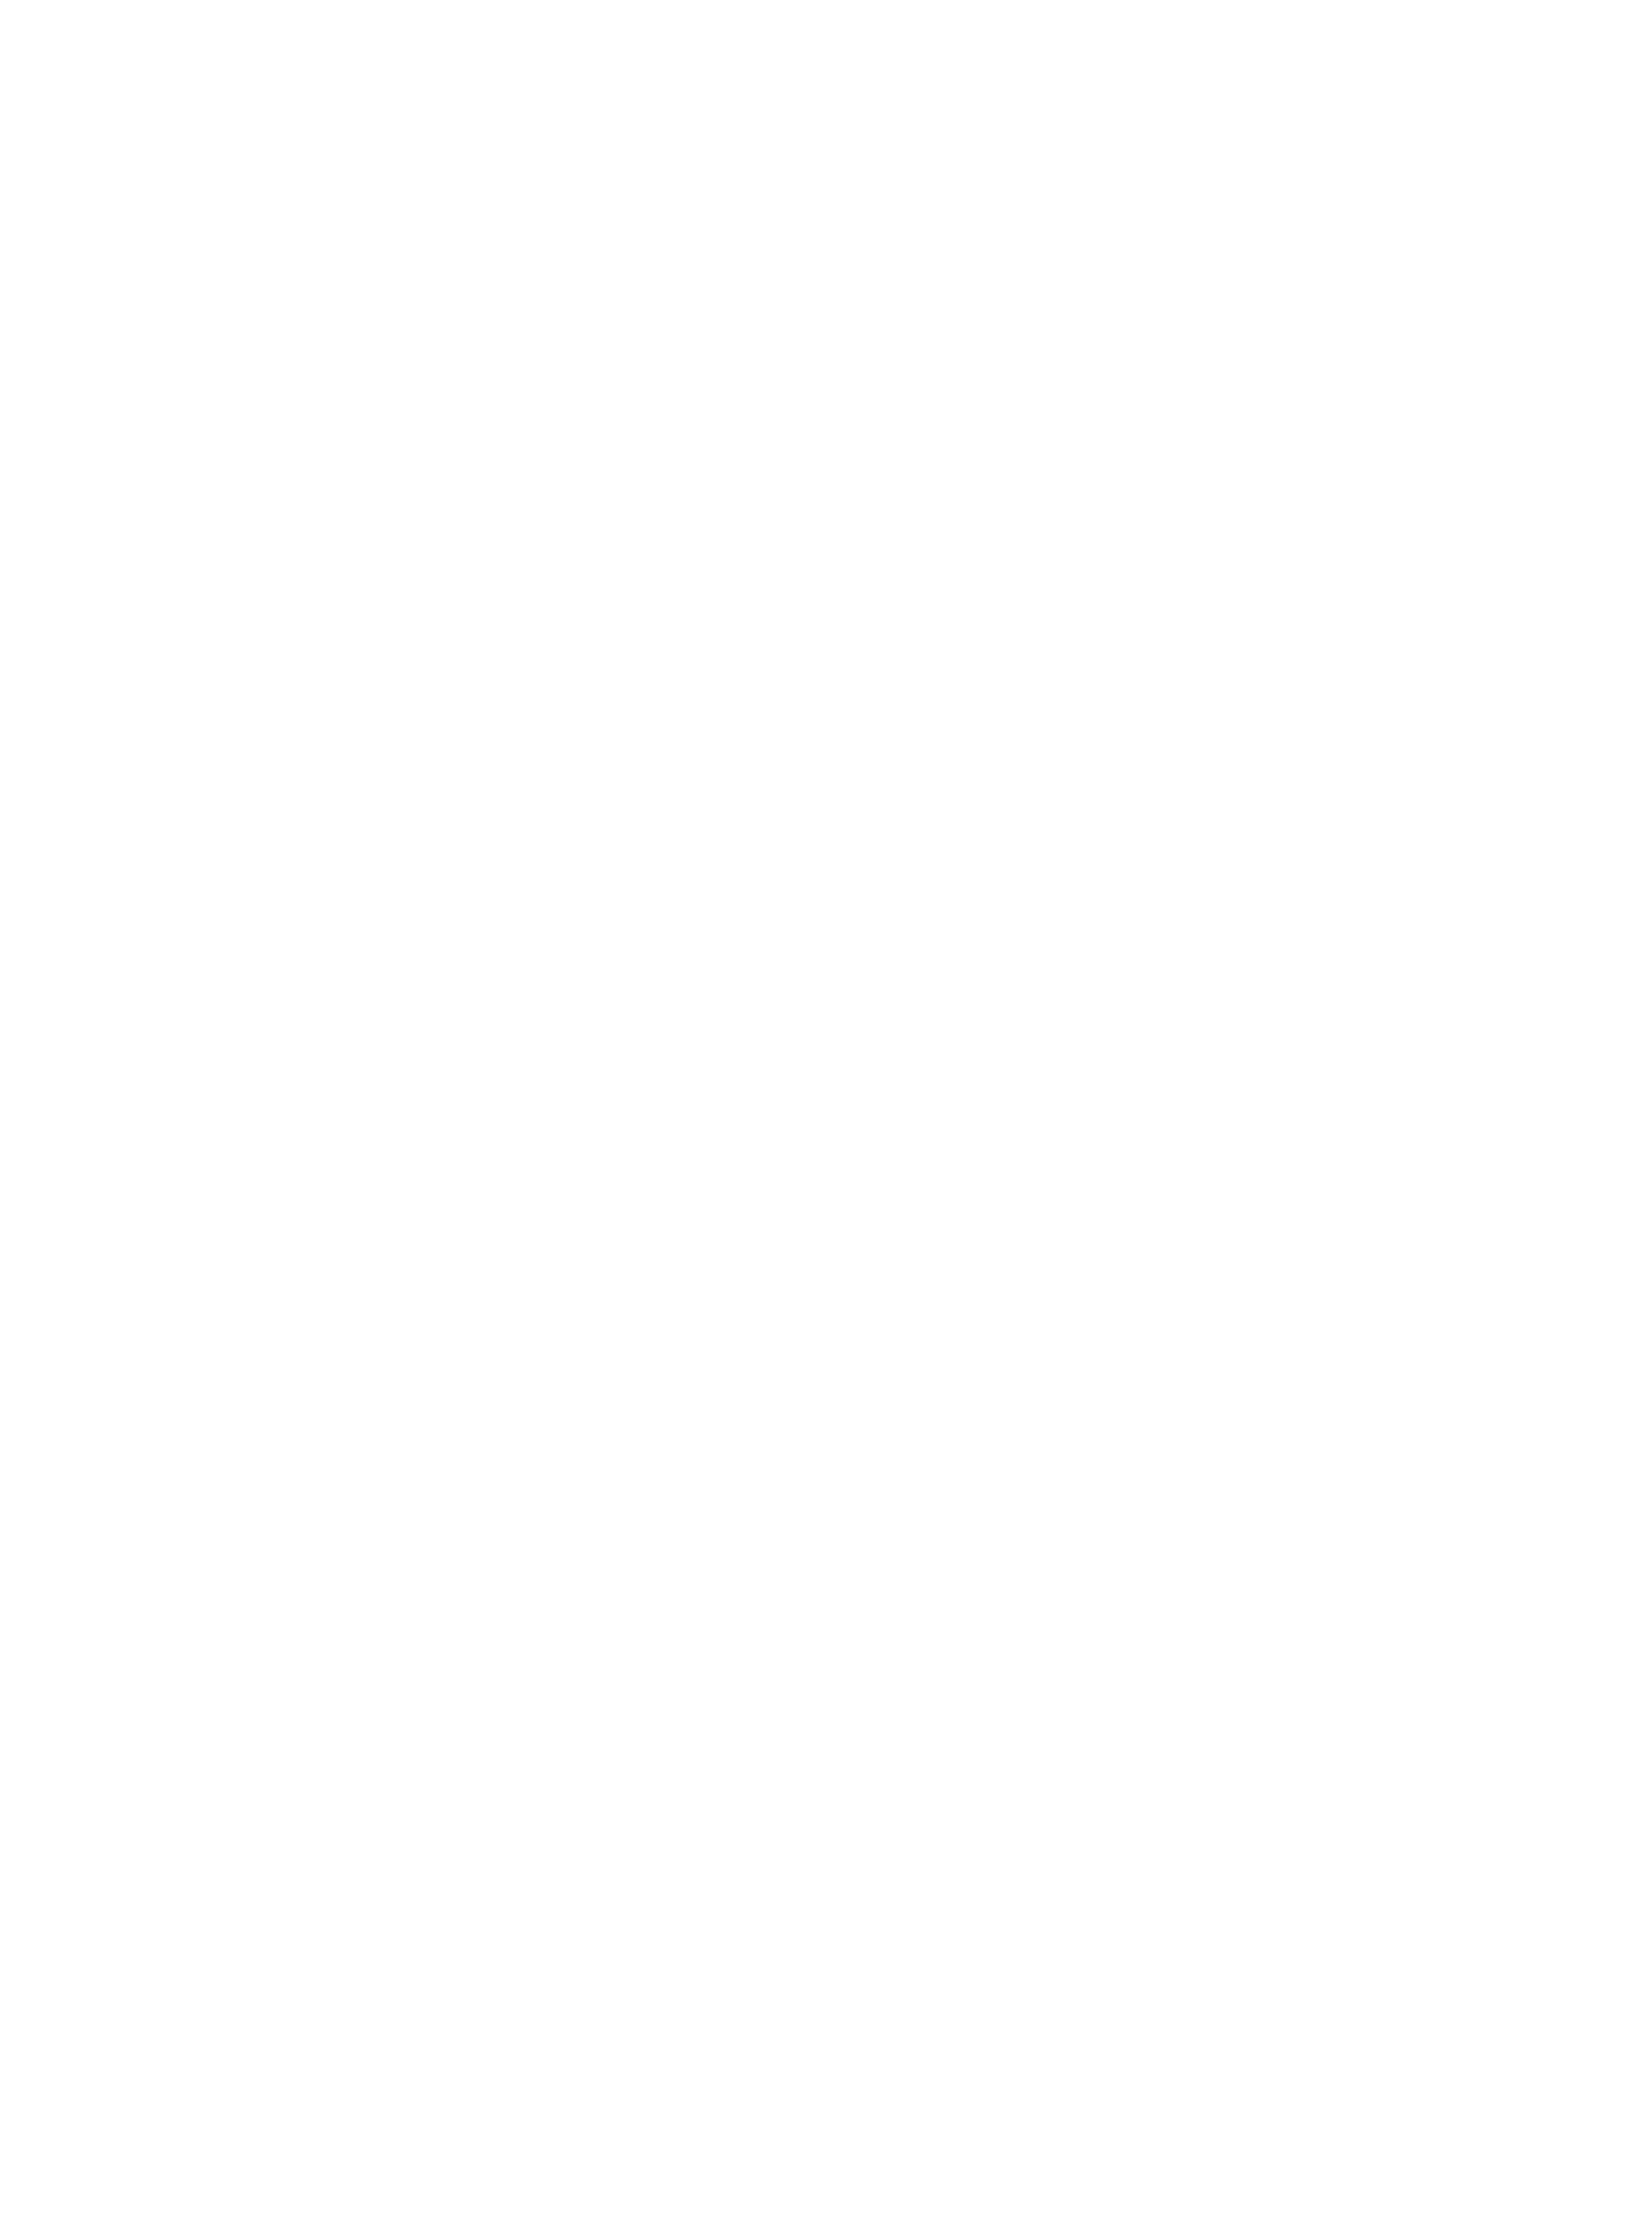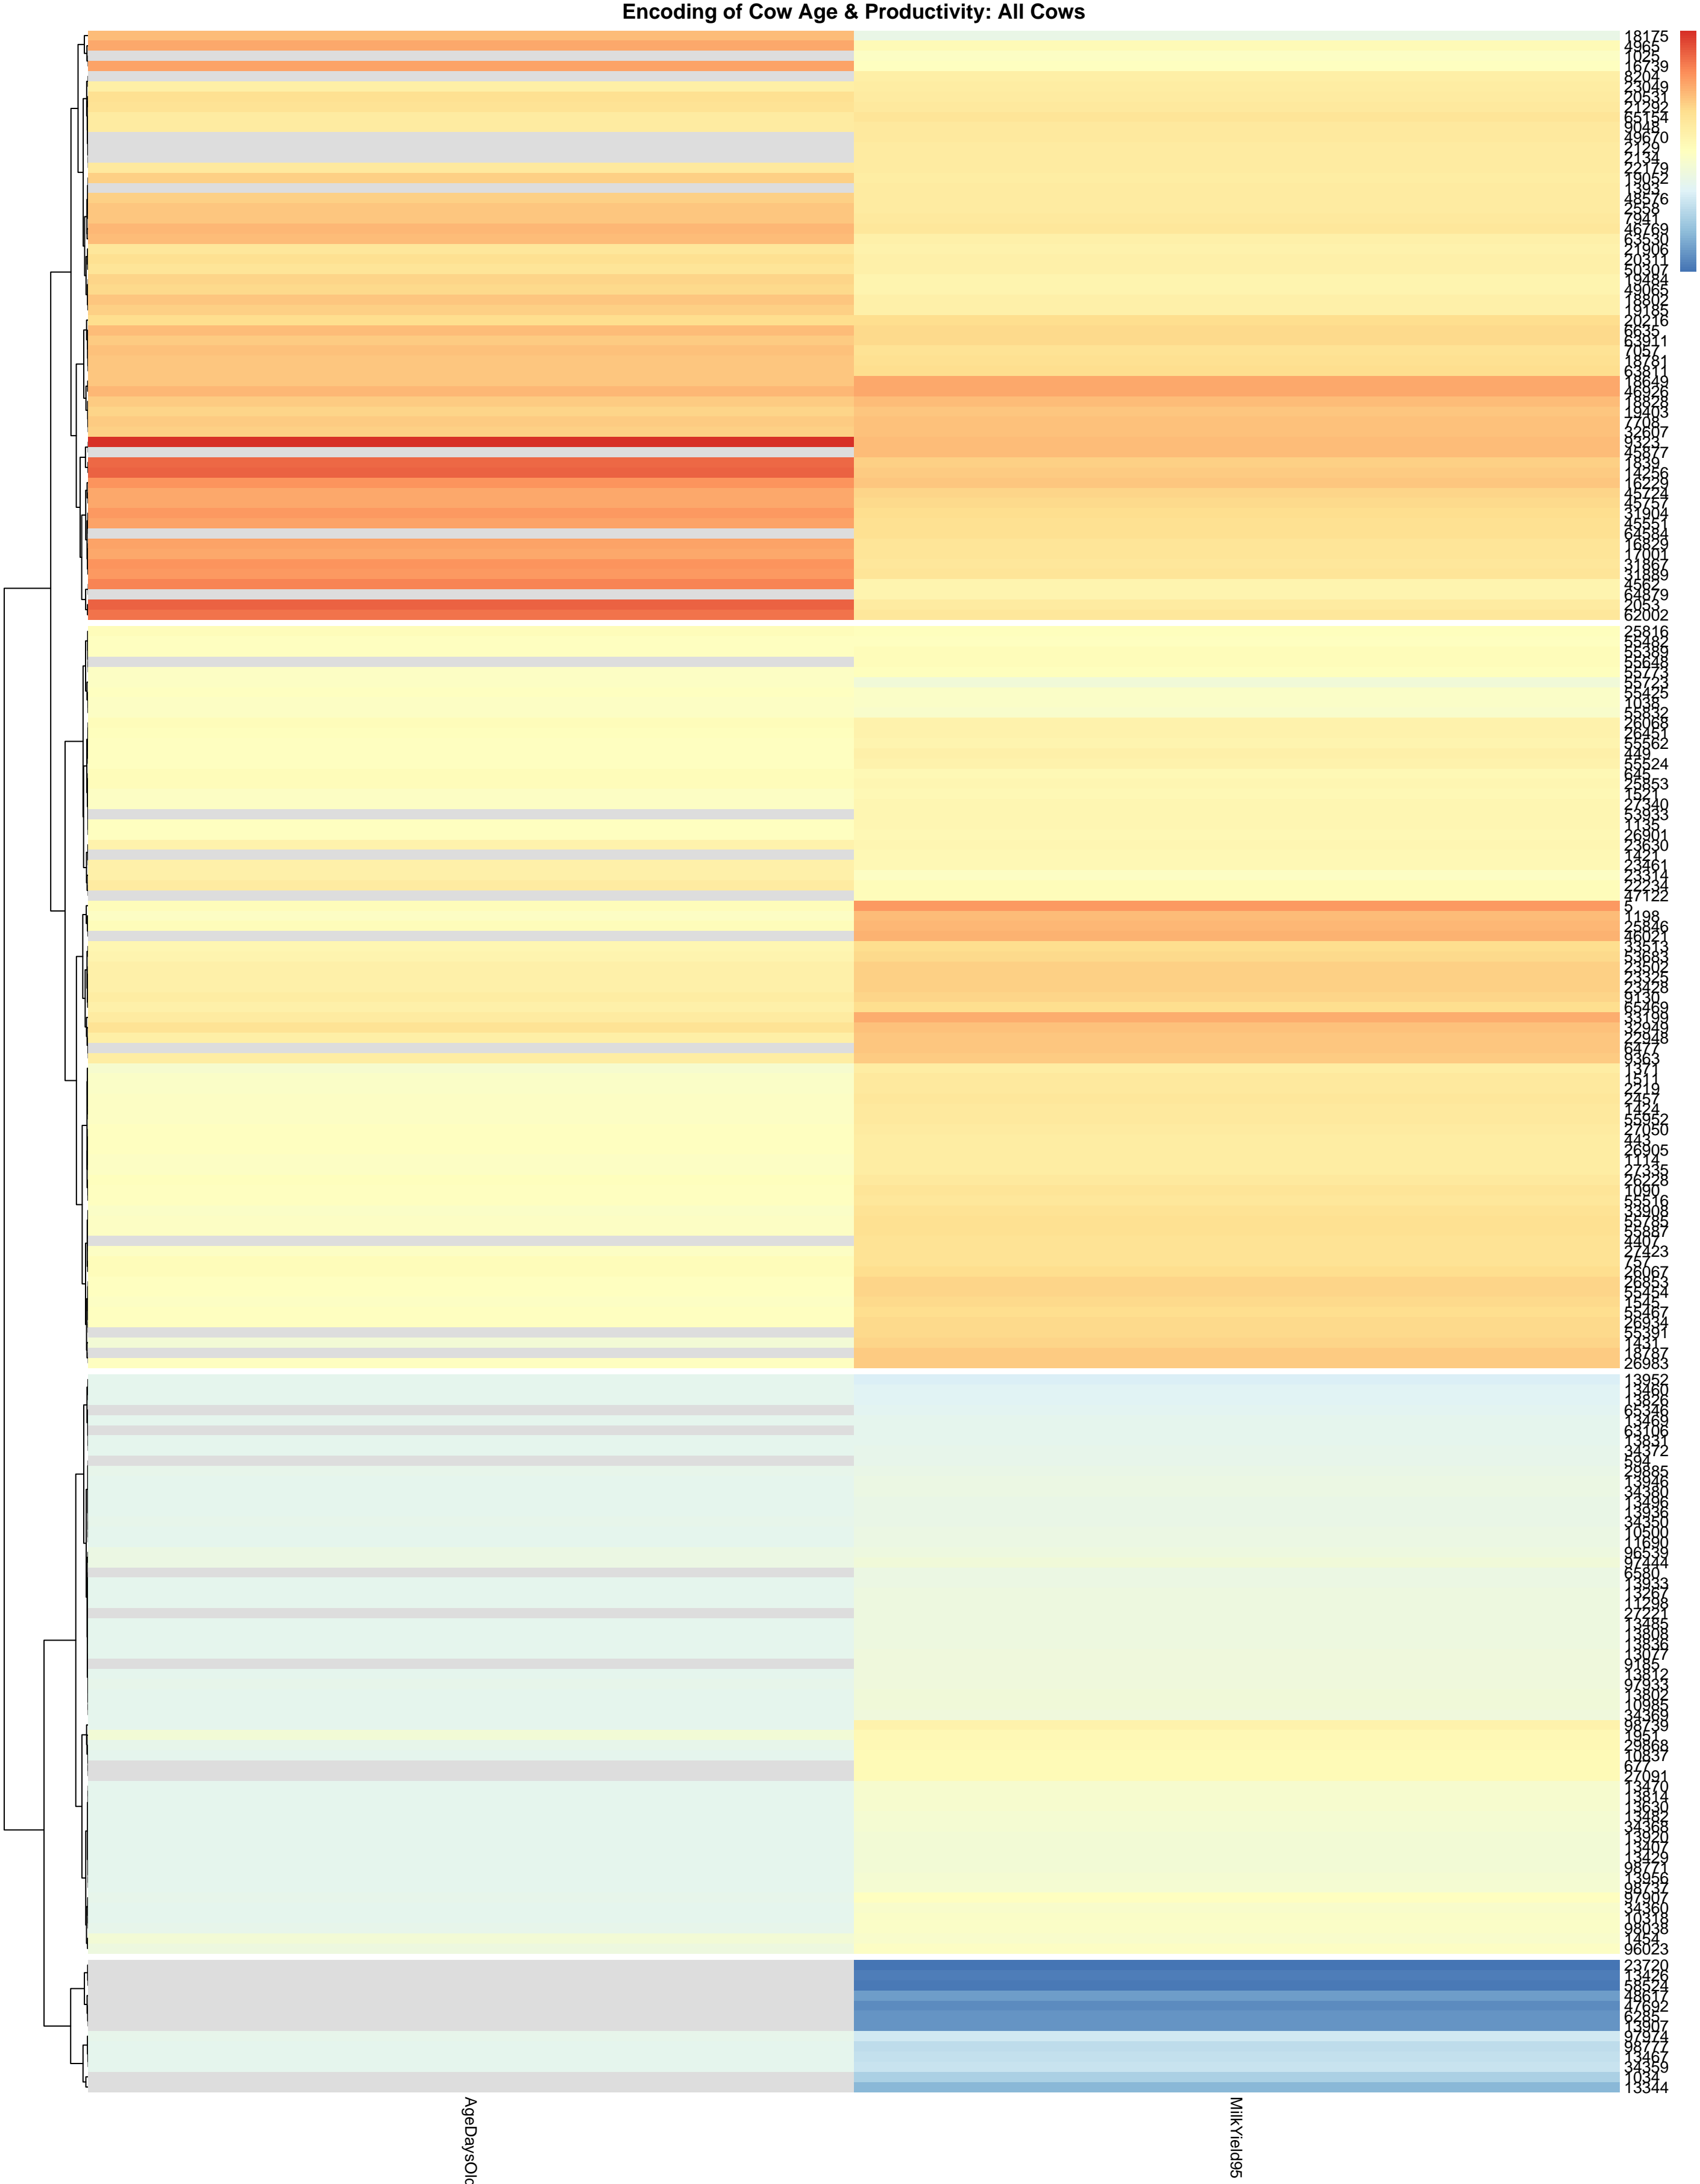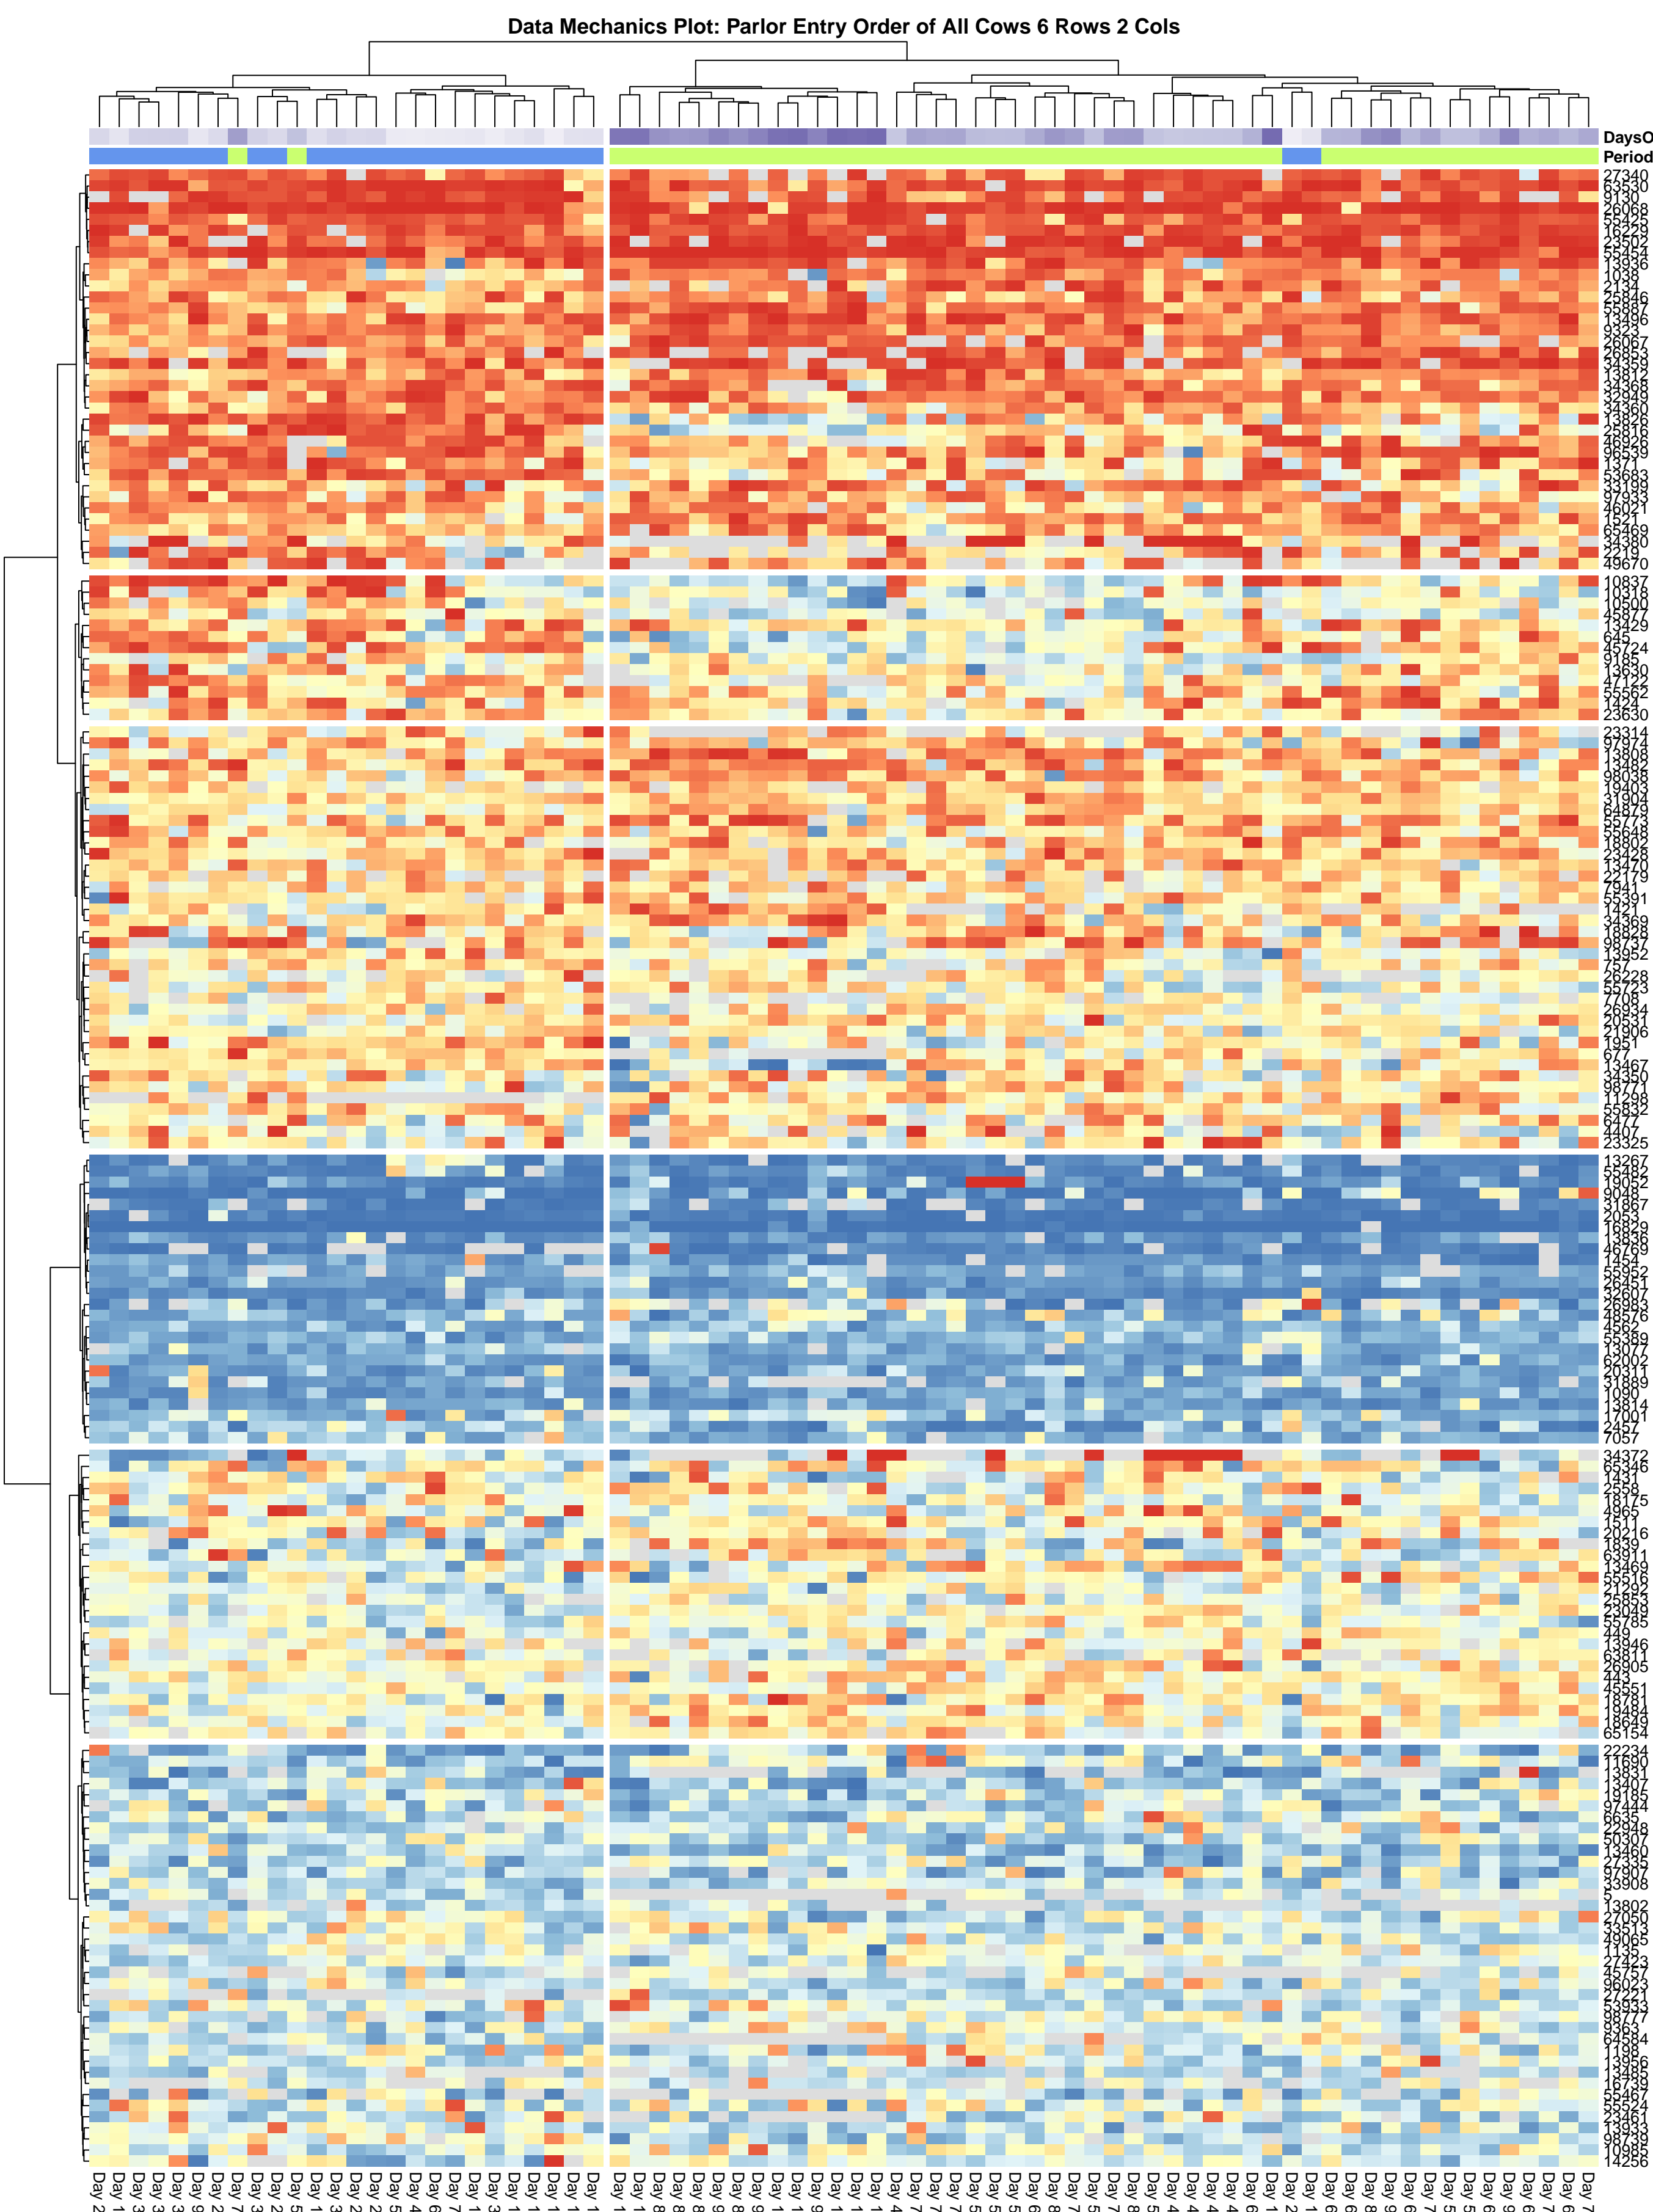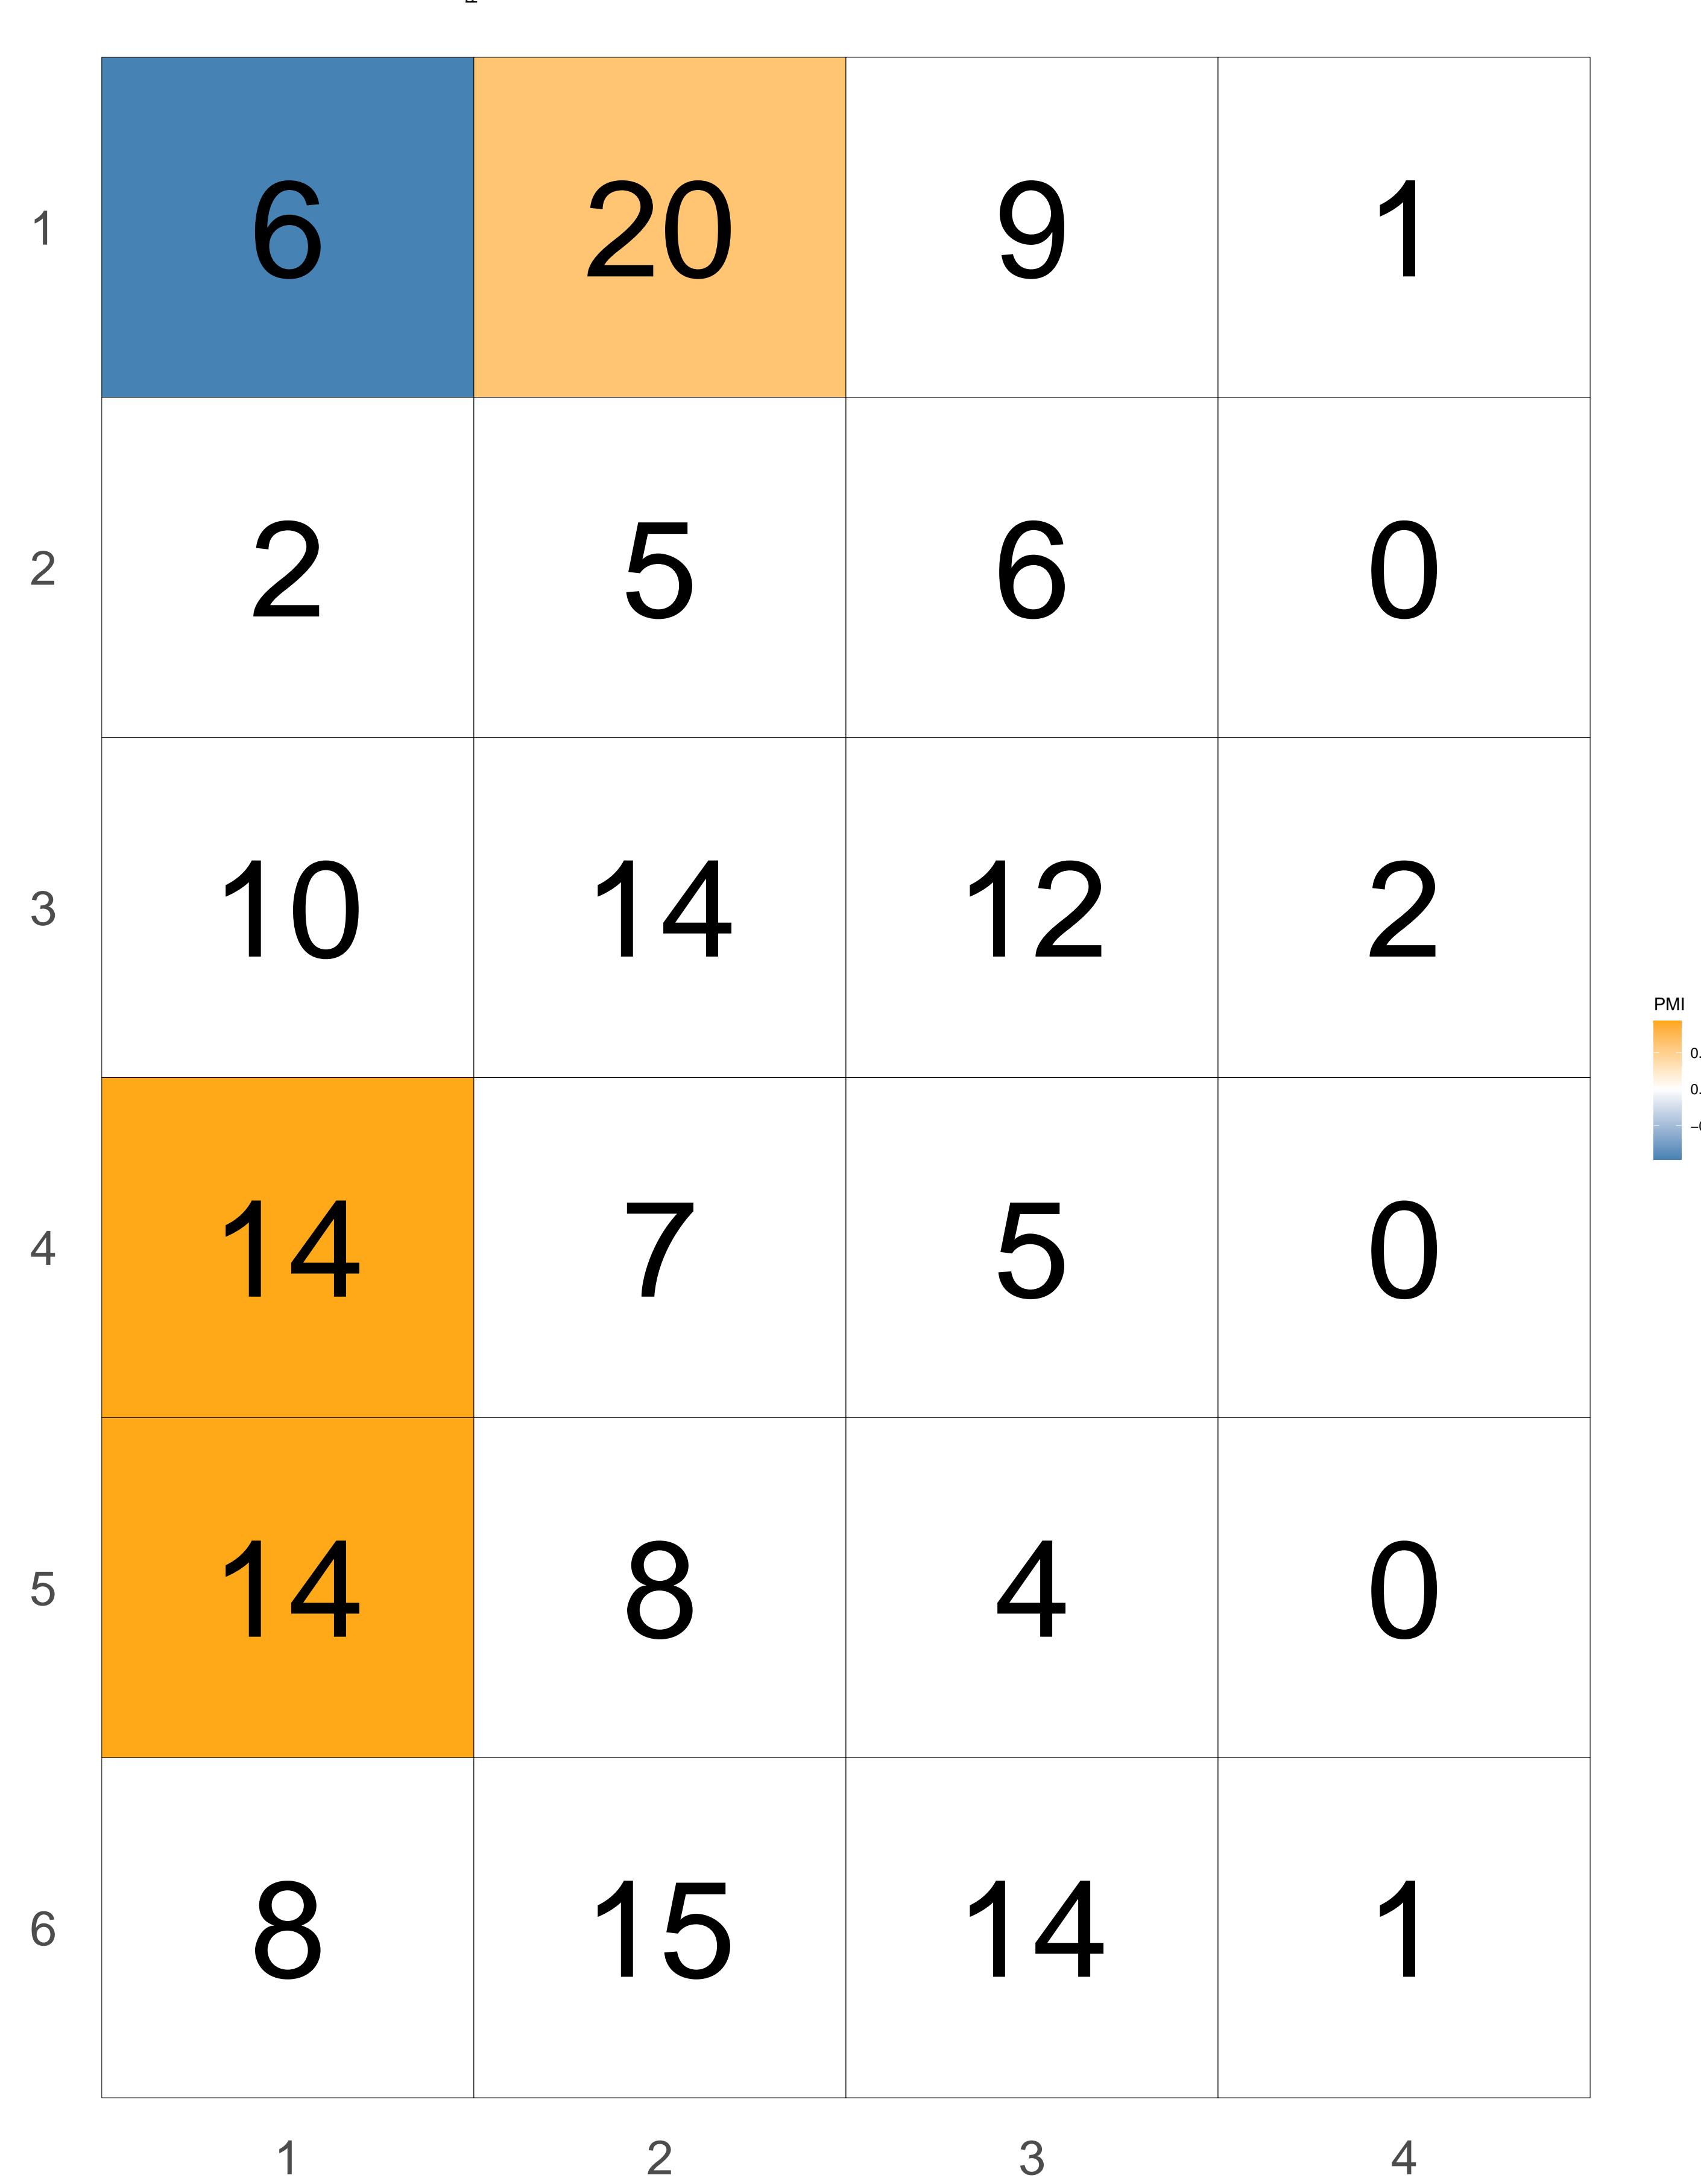

Supplement: s1 [file s1]

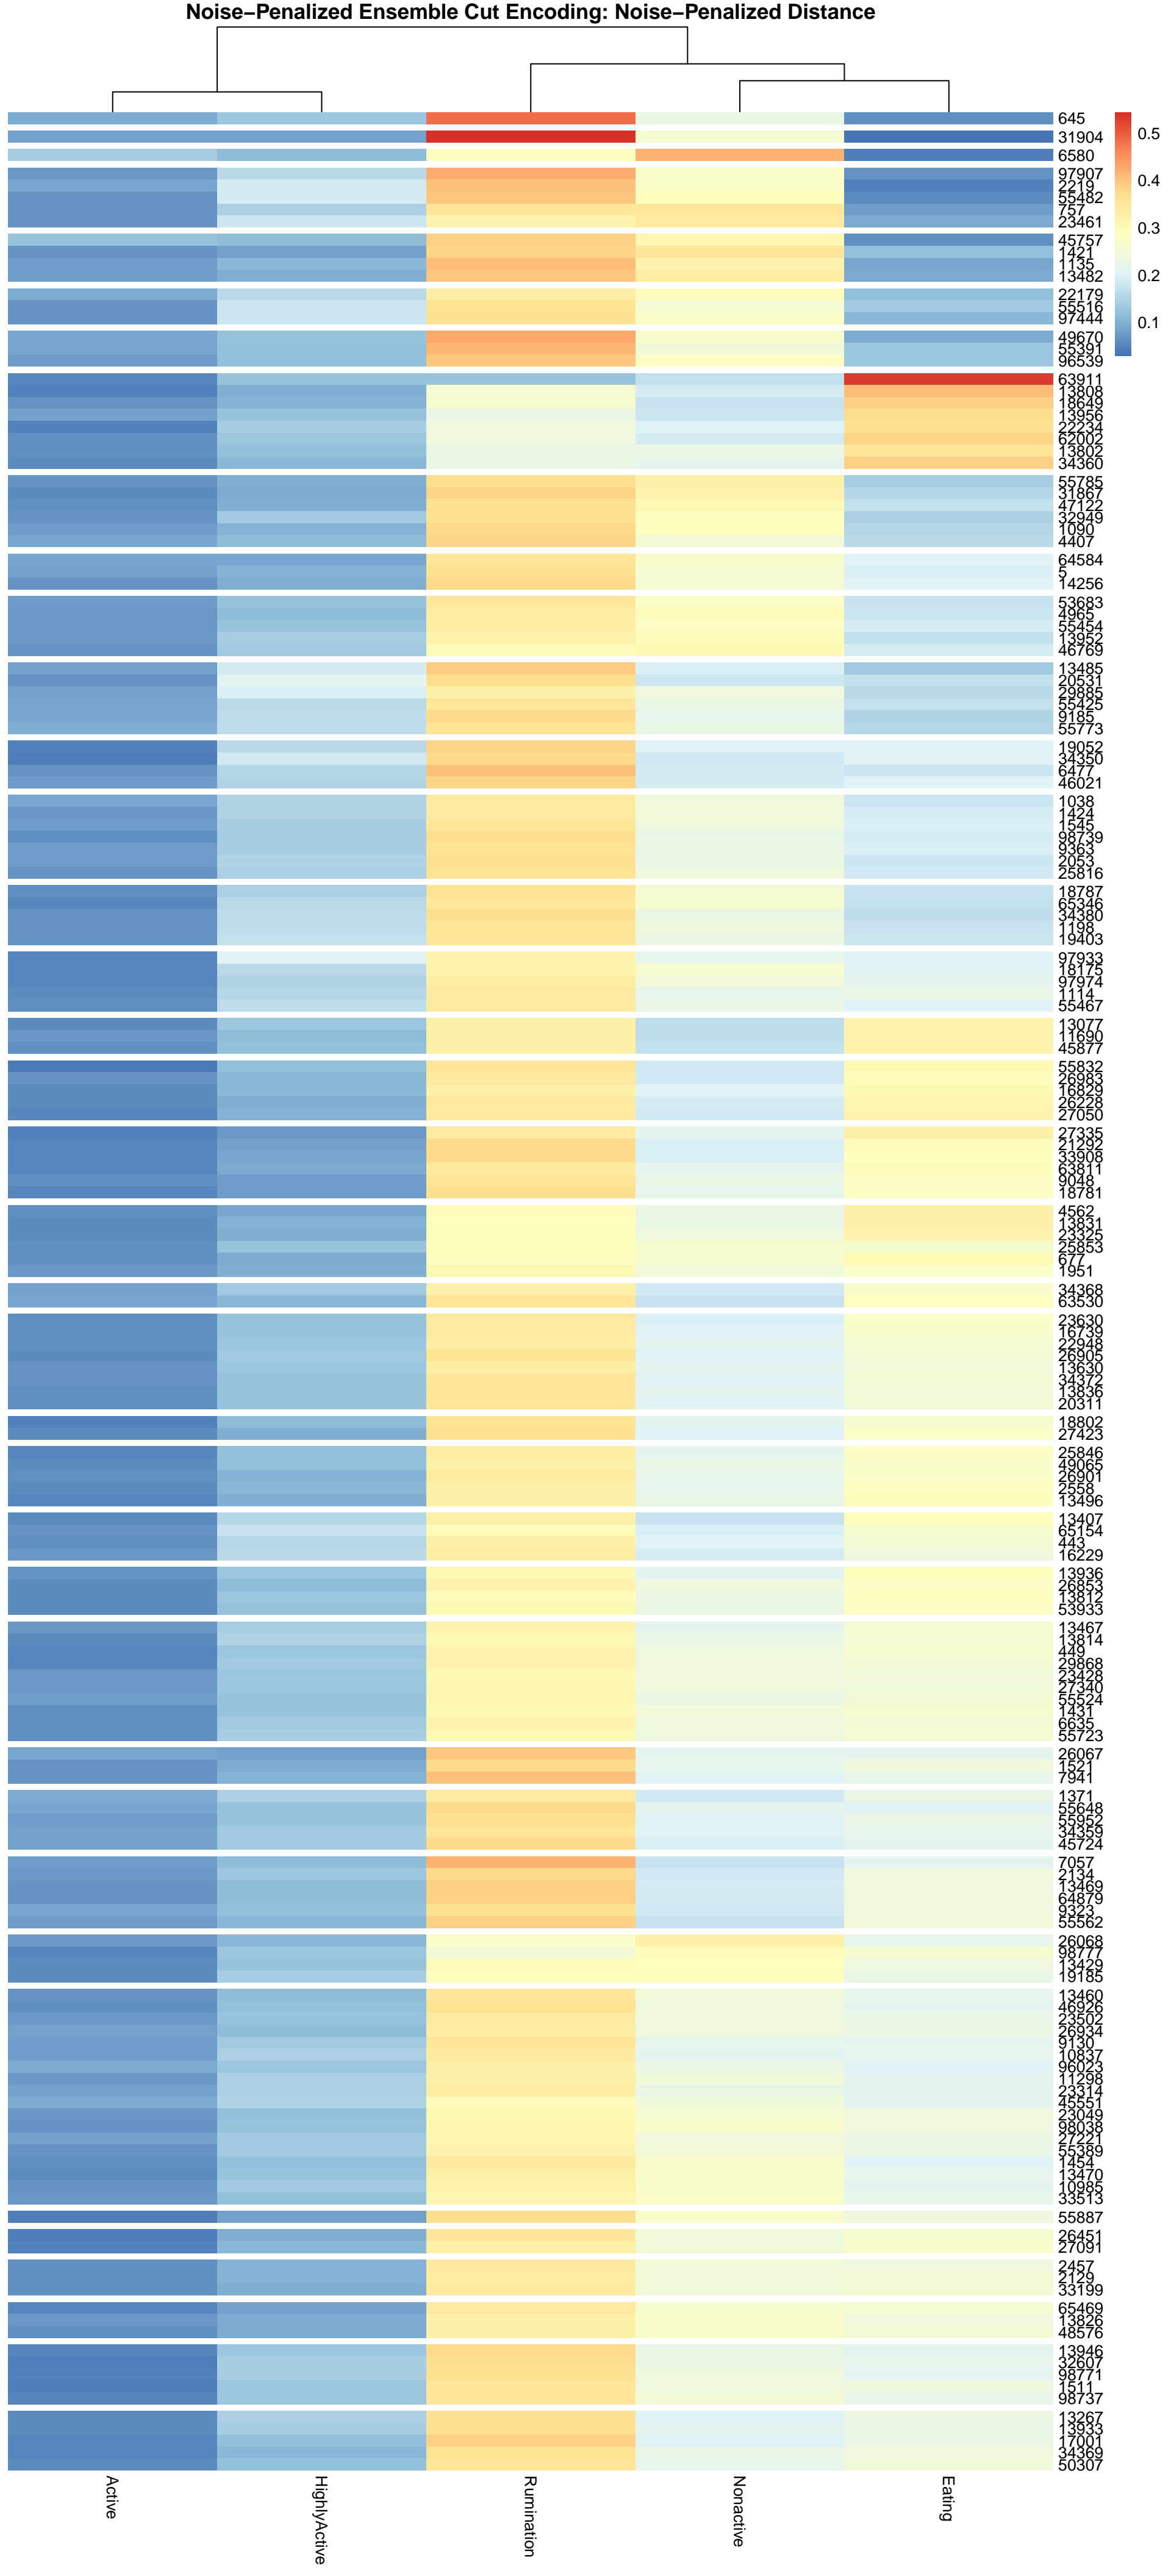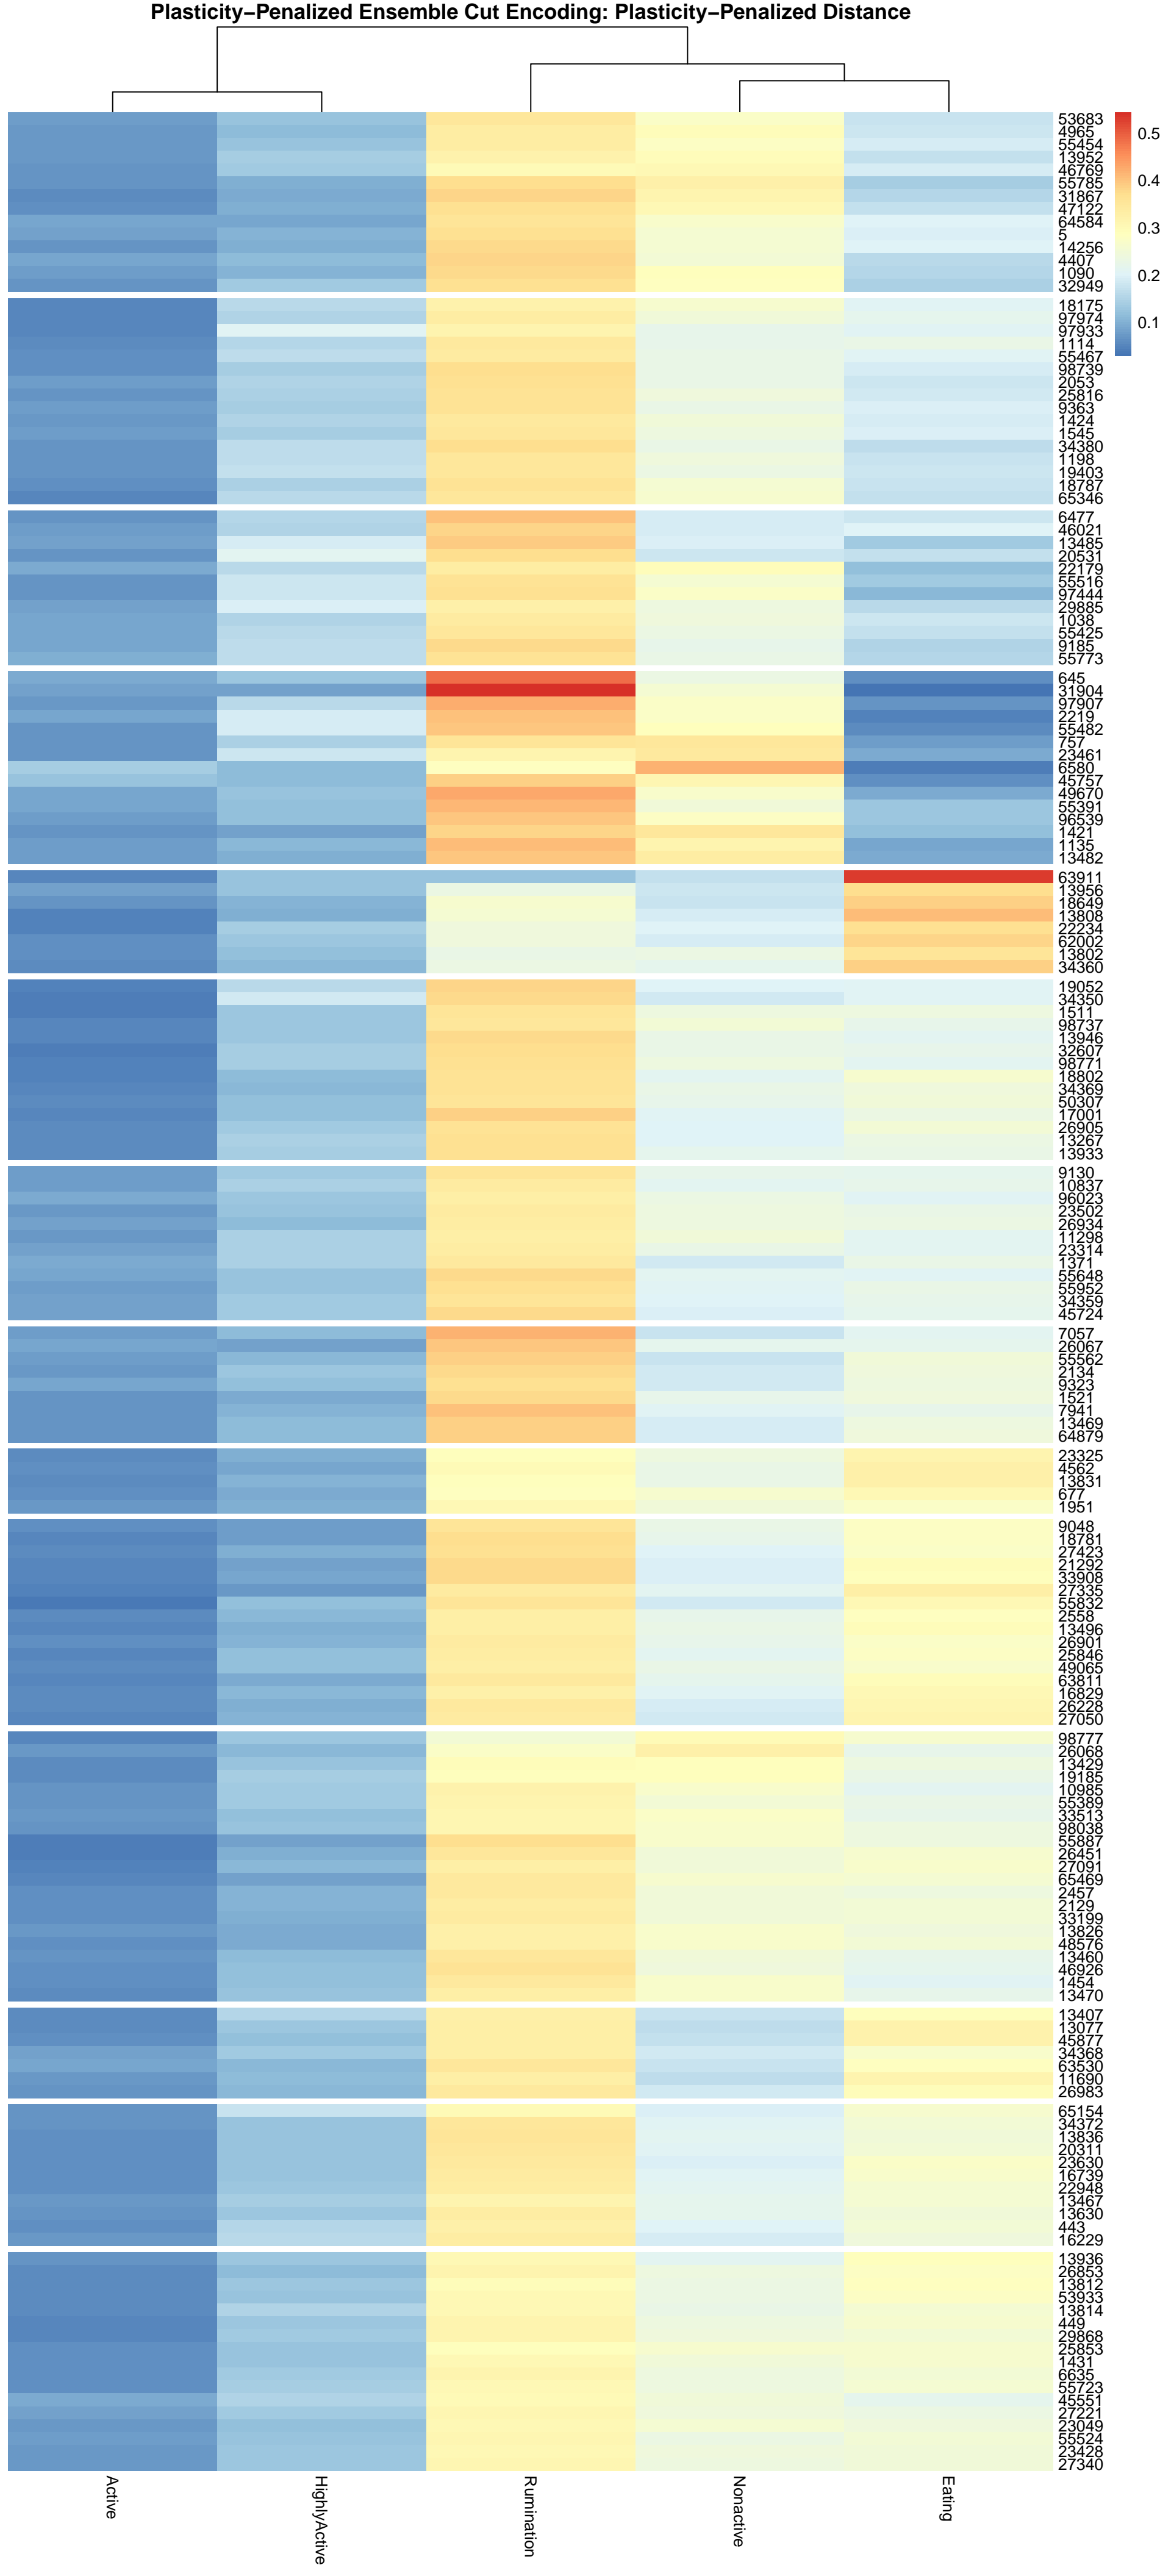

Supplement: s1 [file s1]

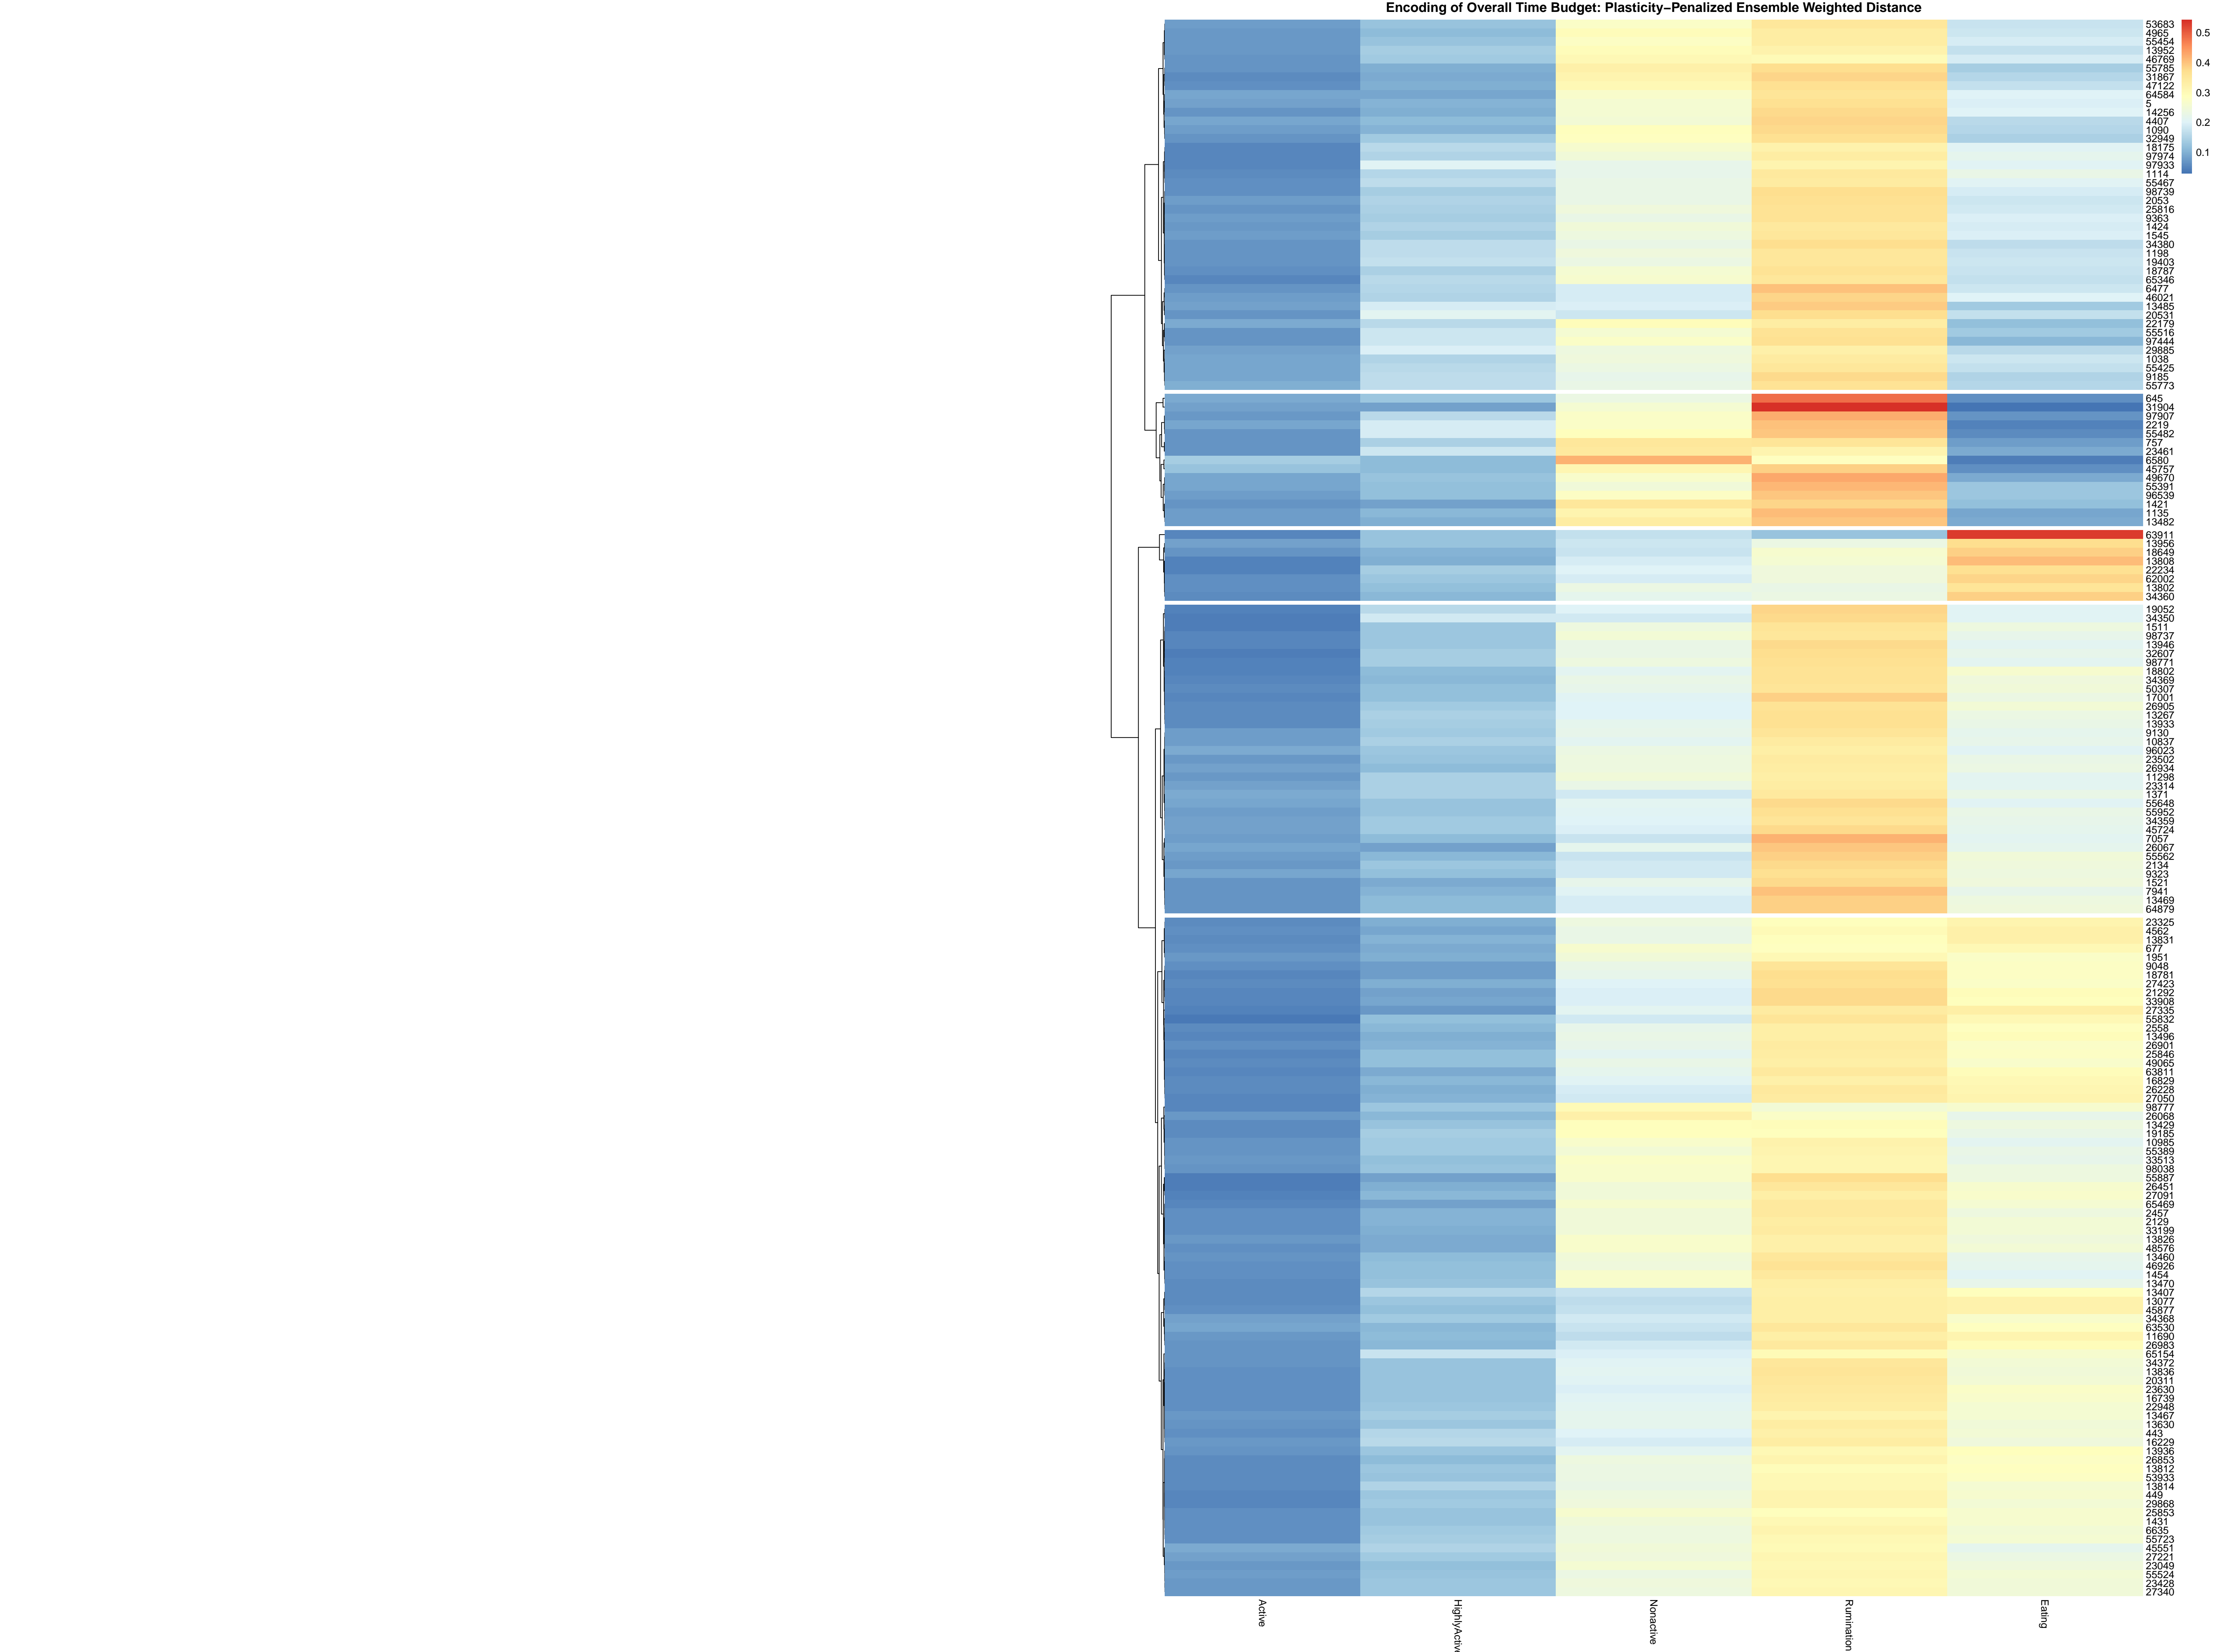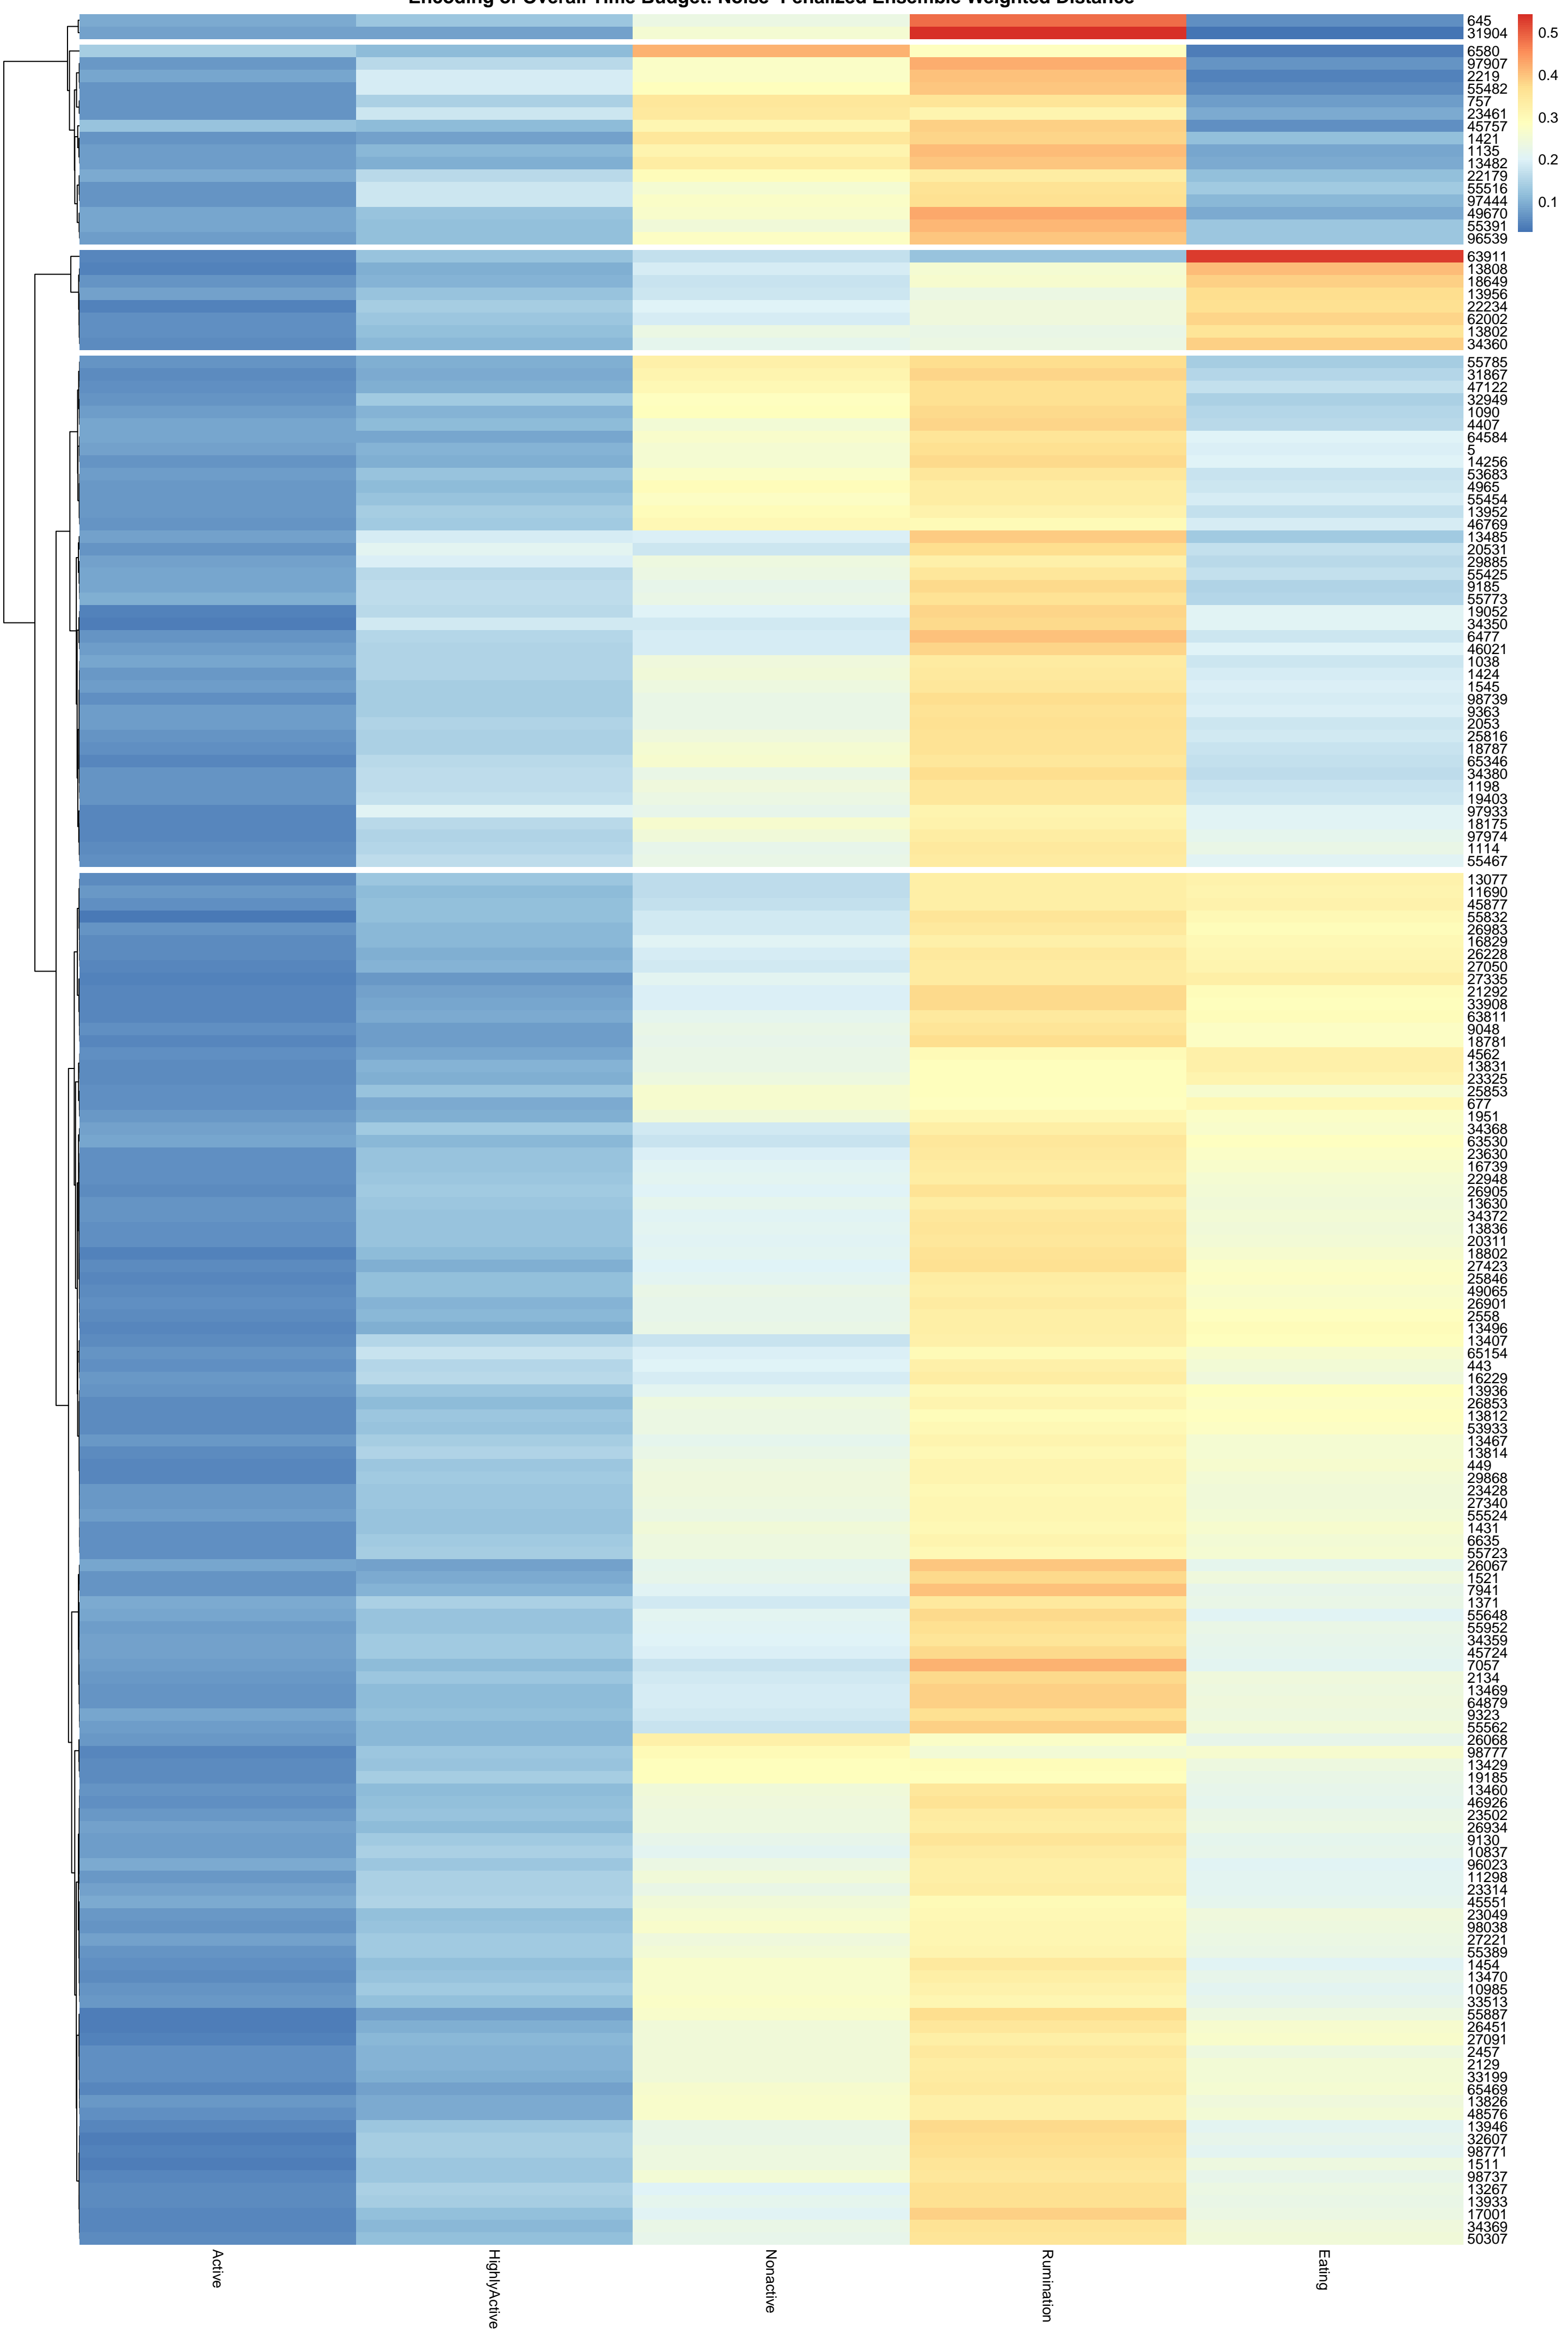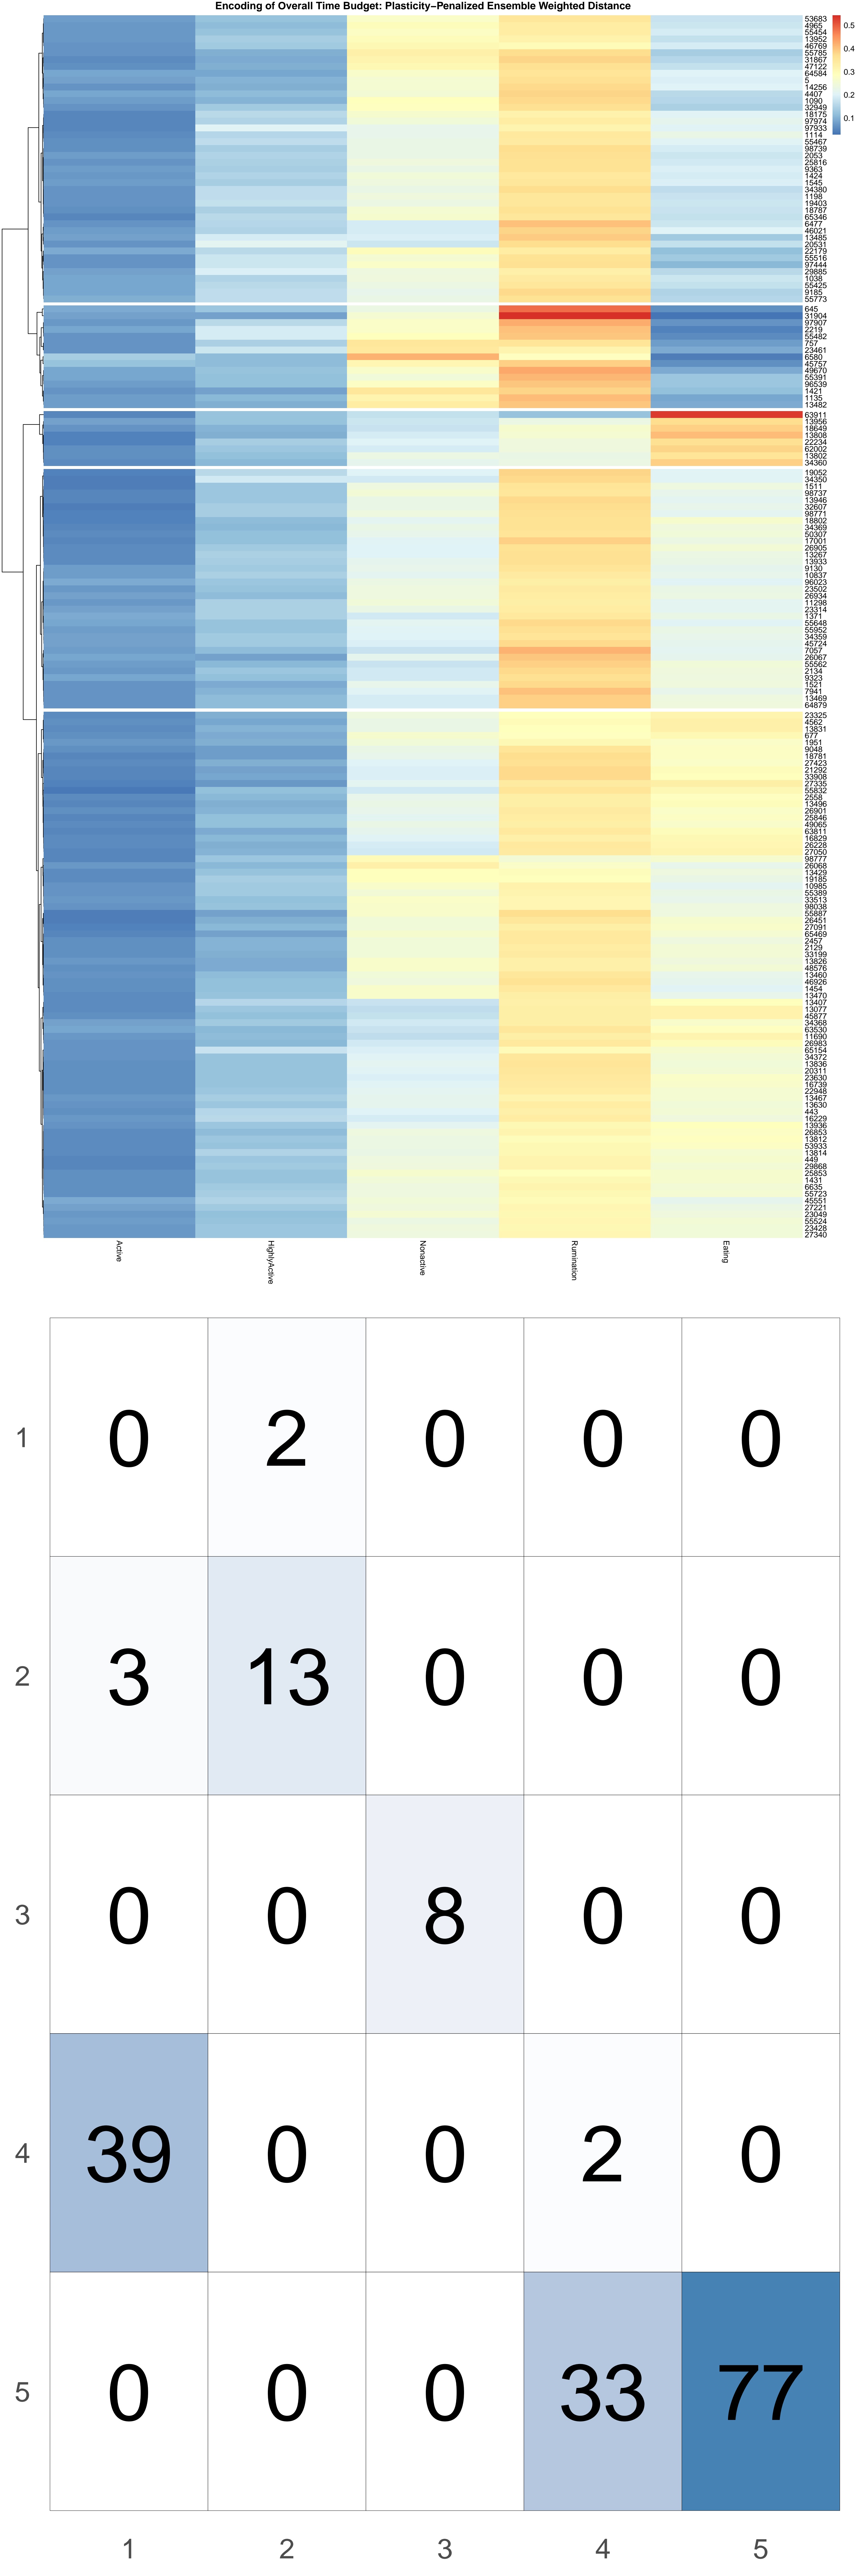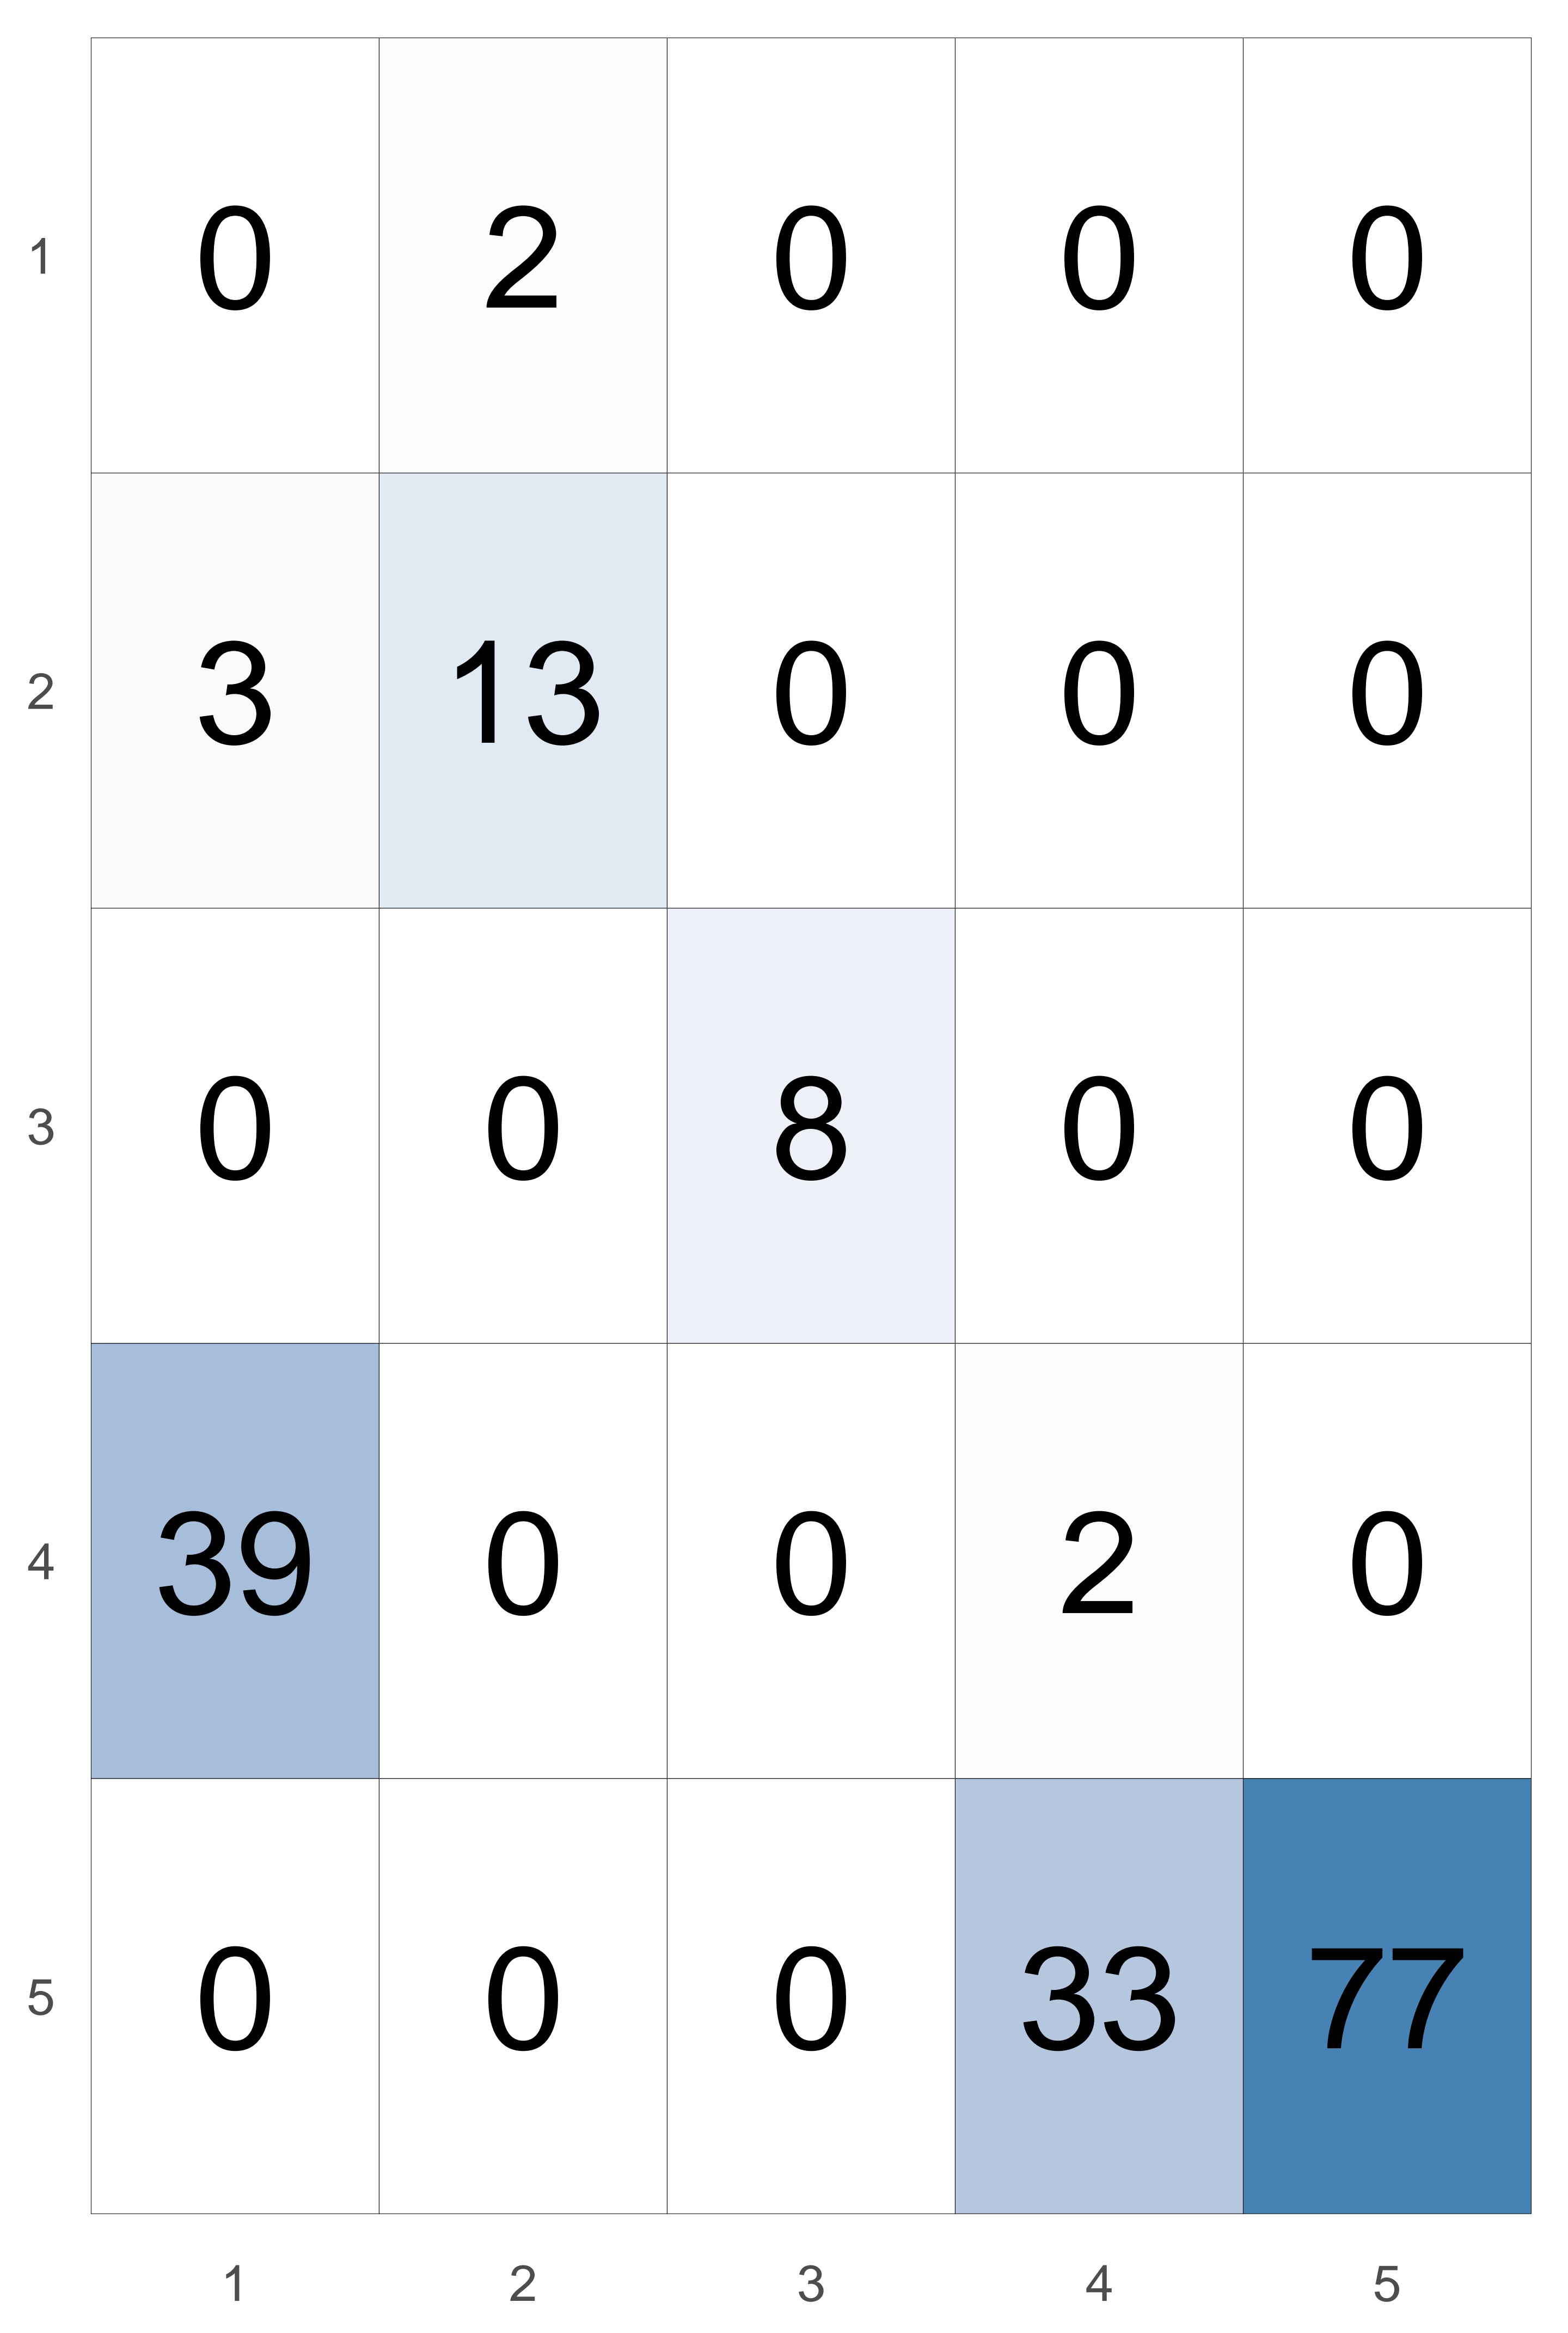

Supplement: s1 [file s1]

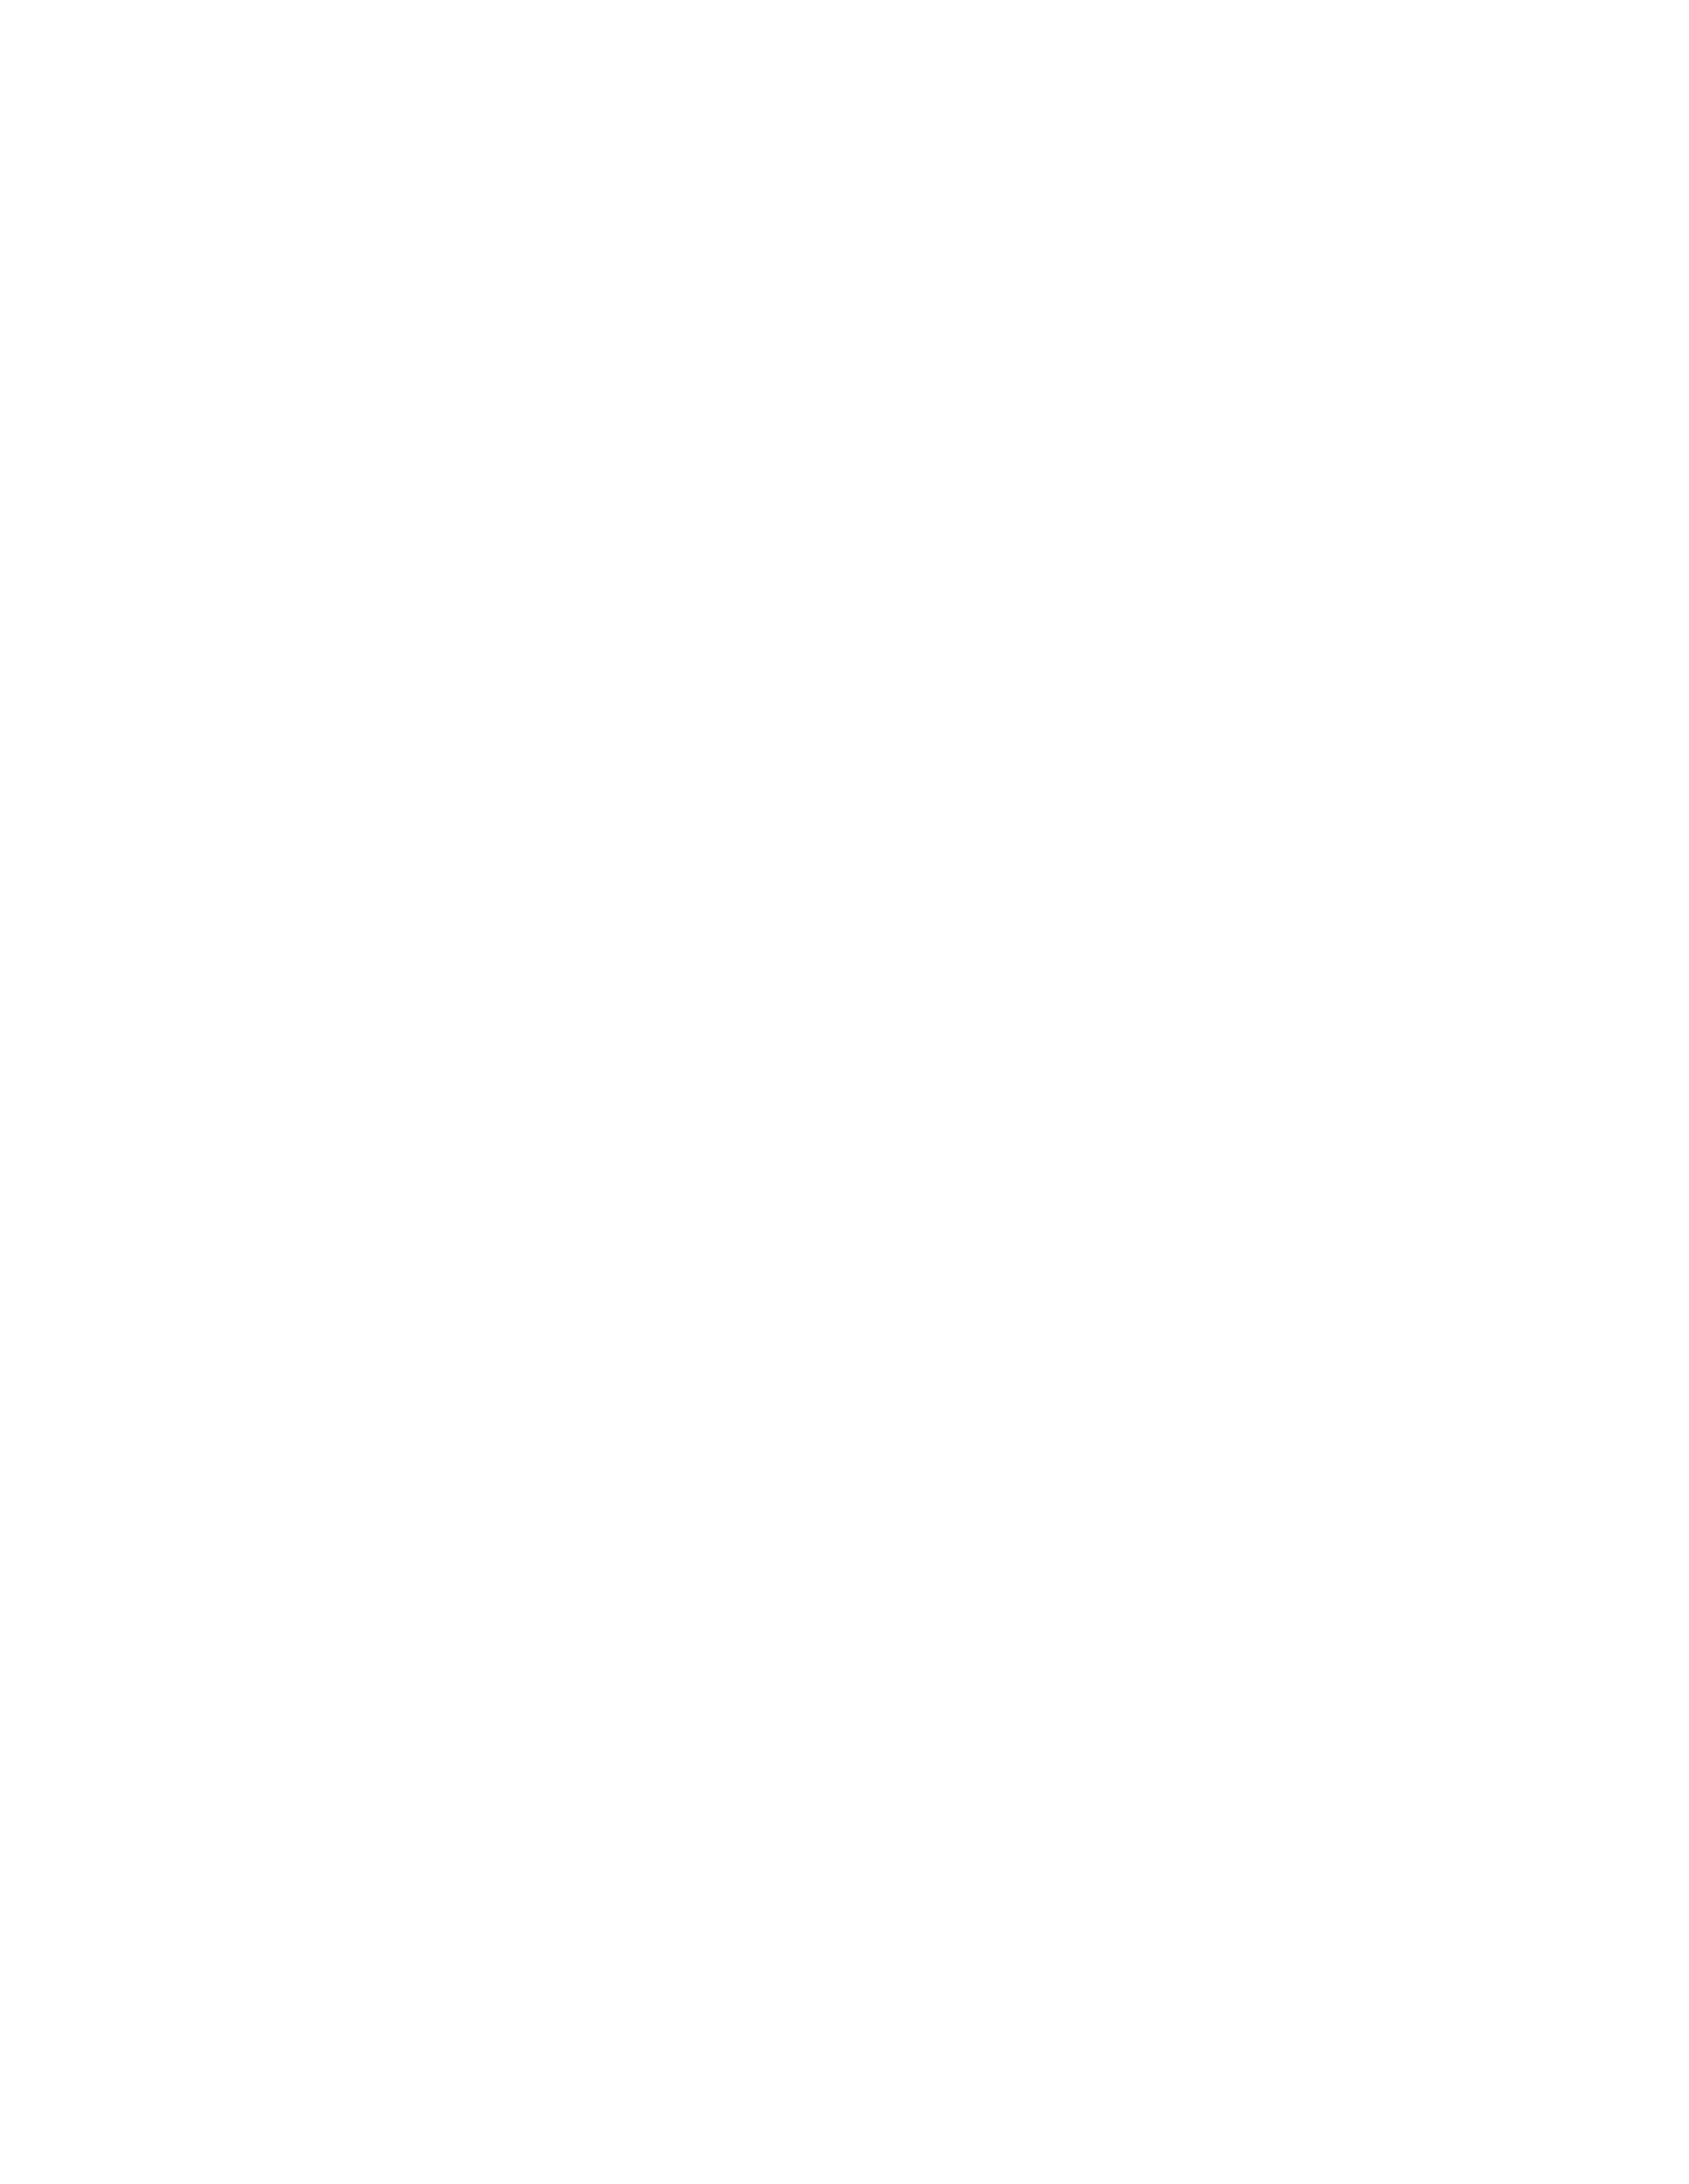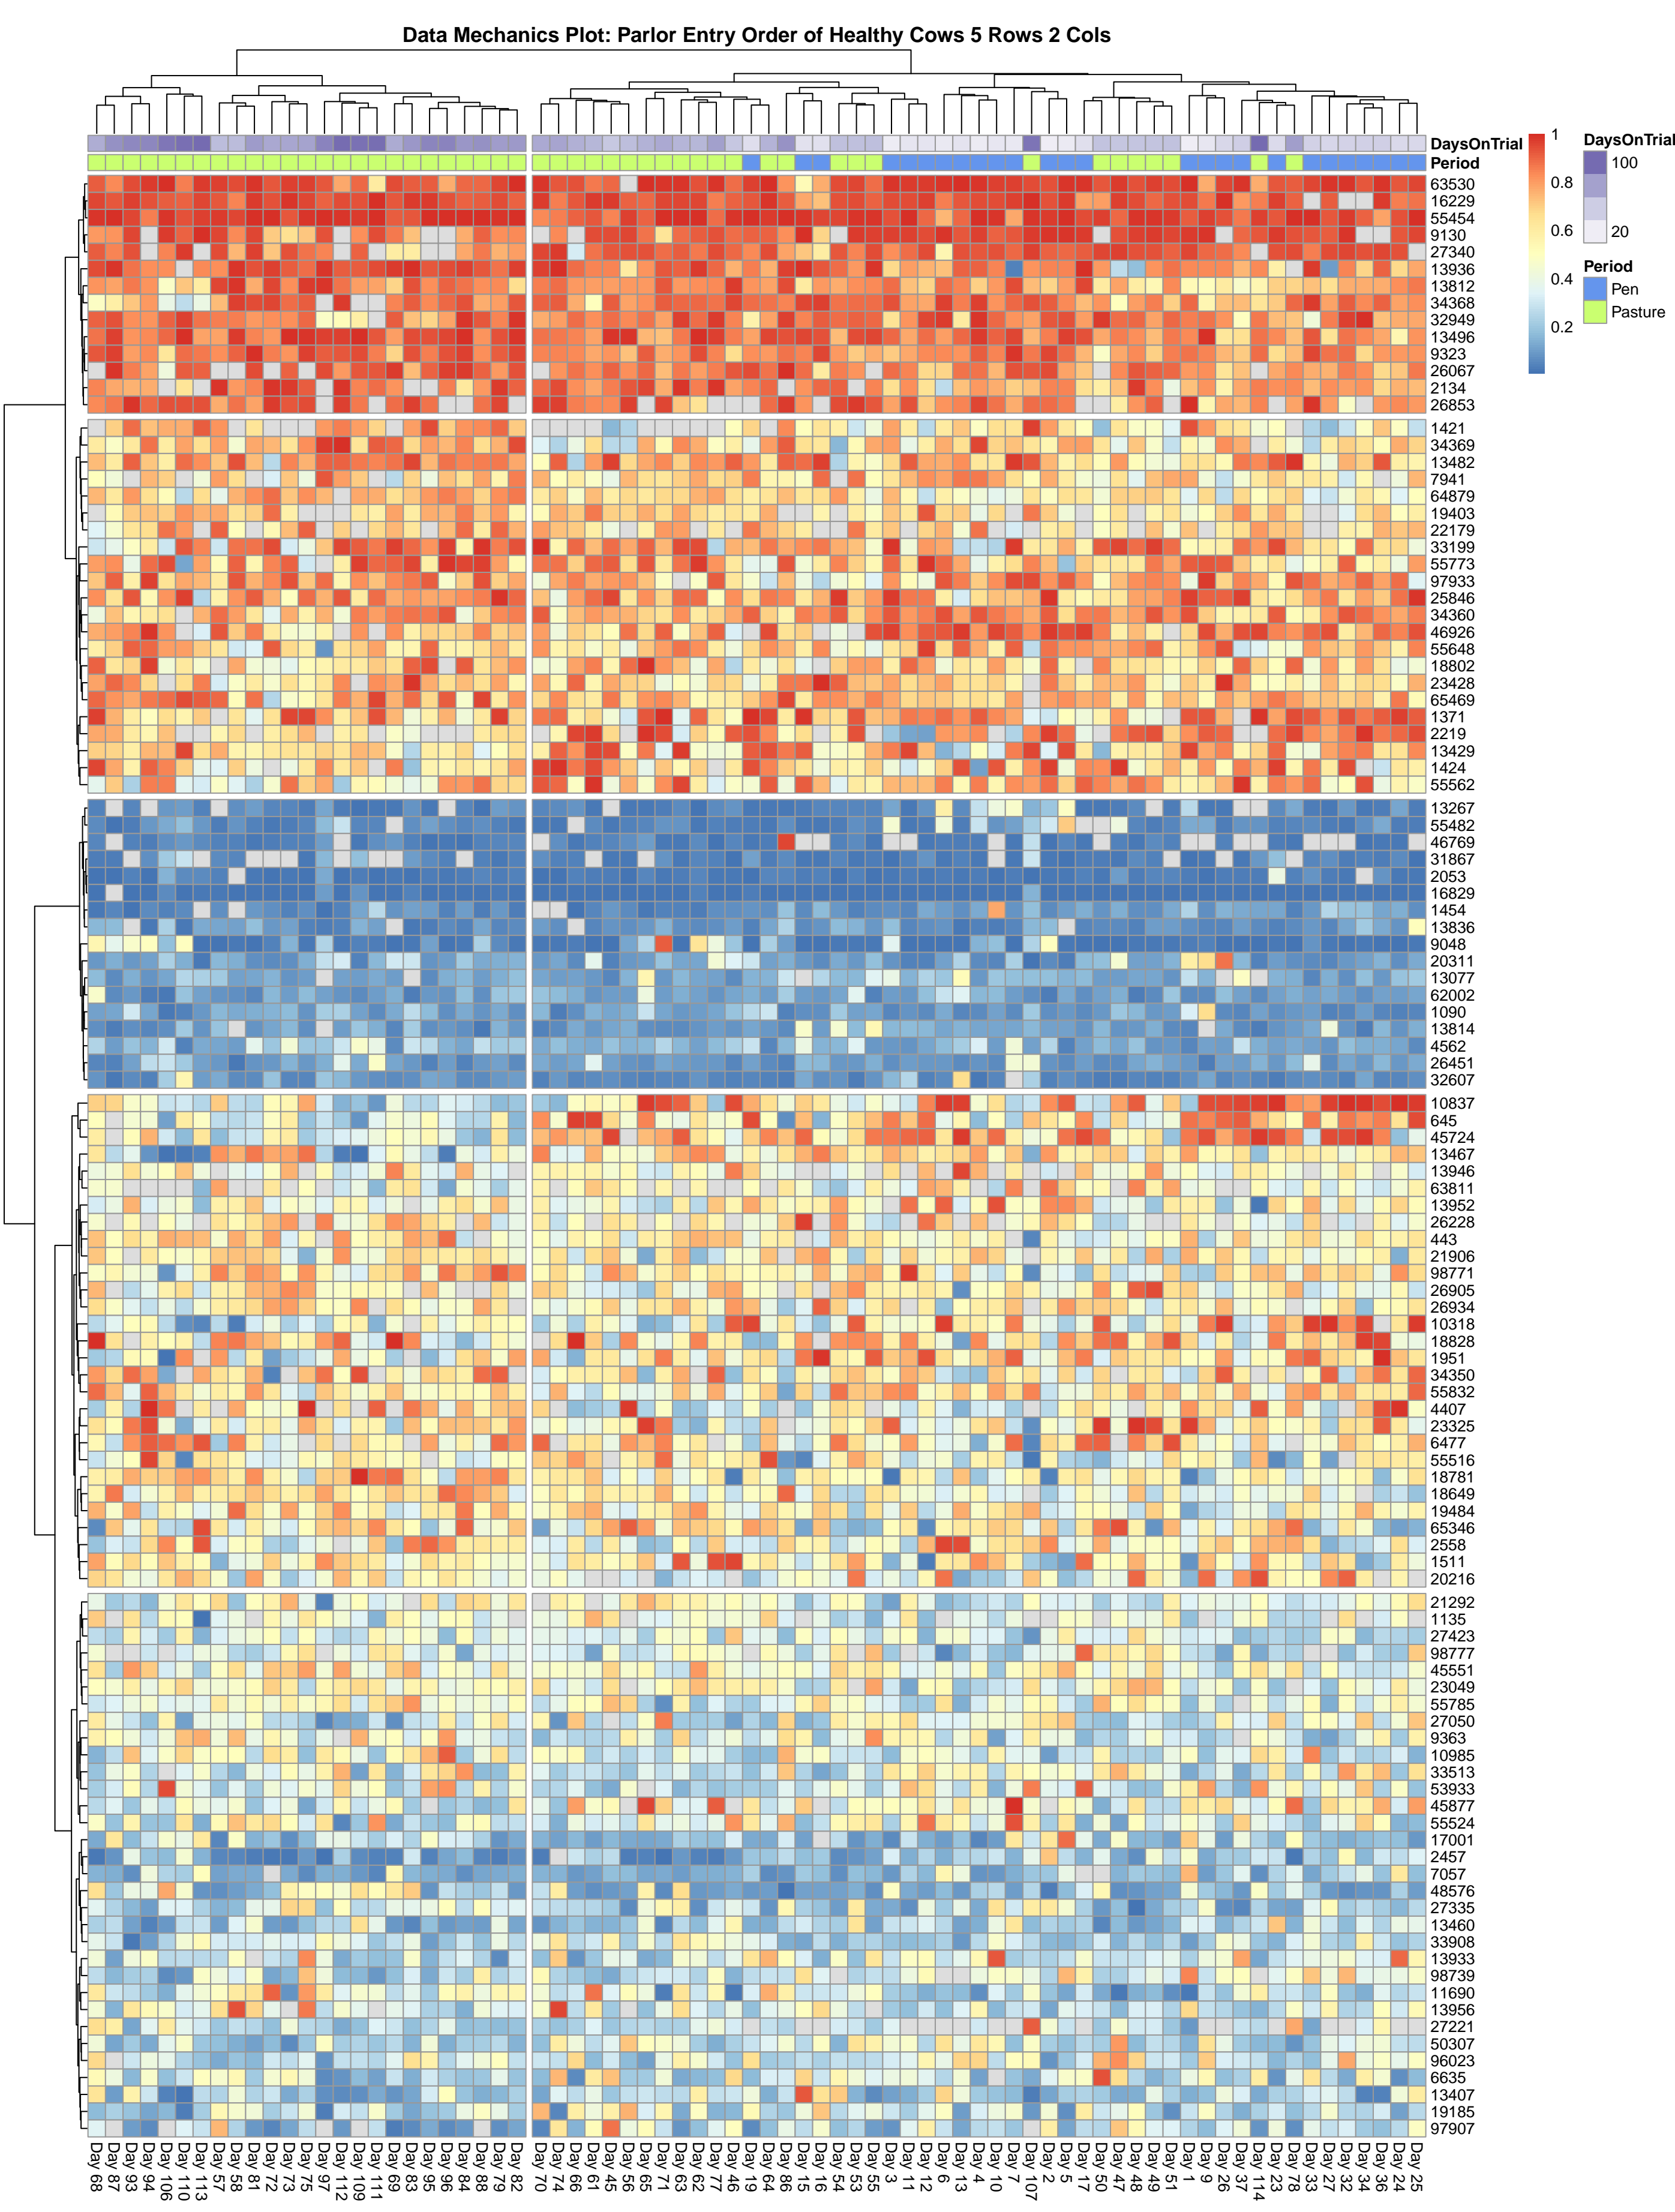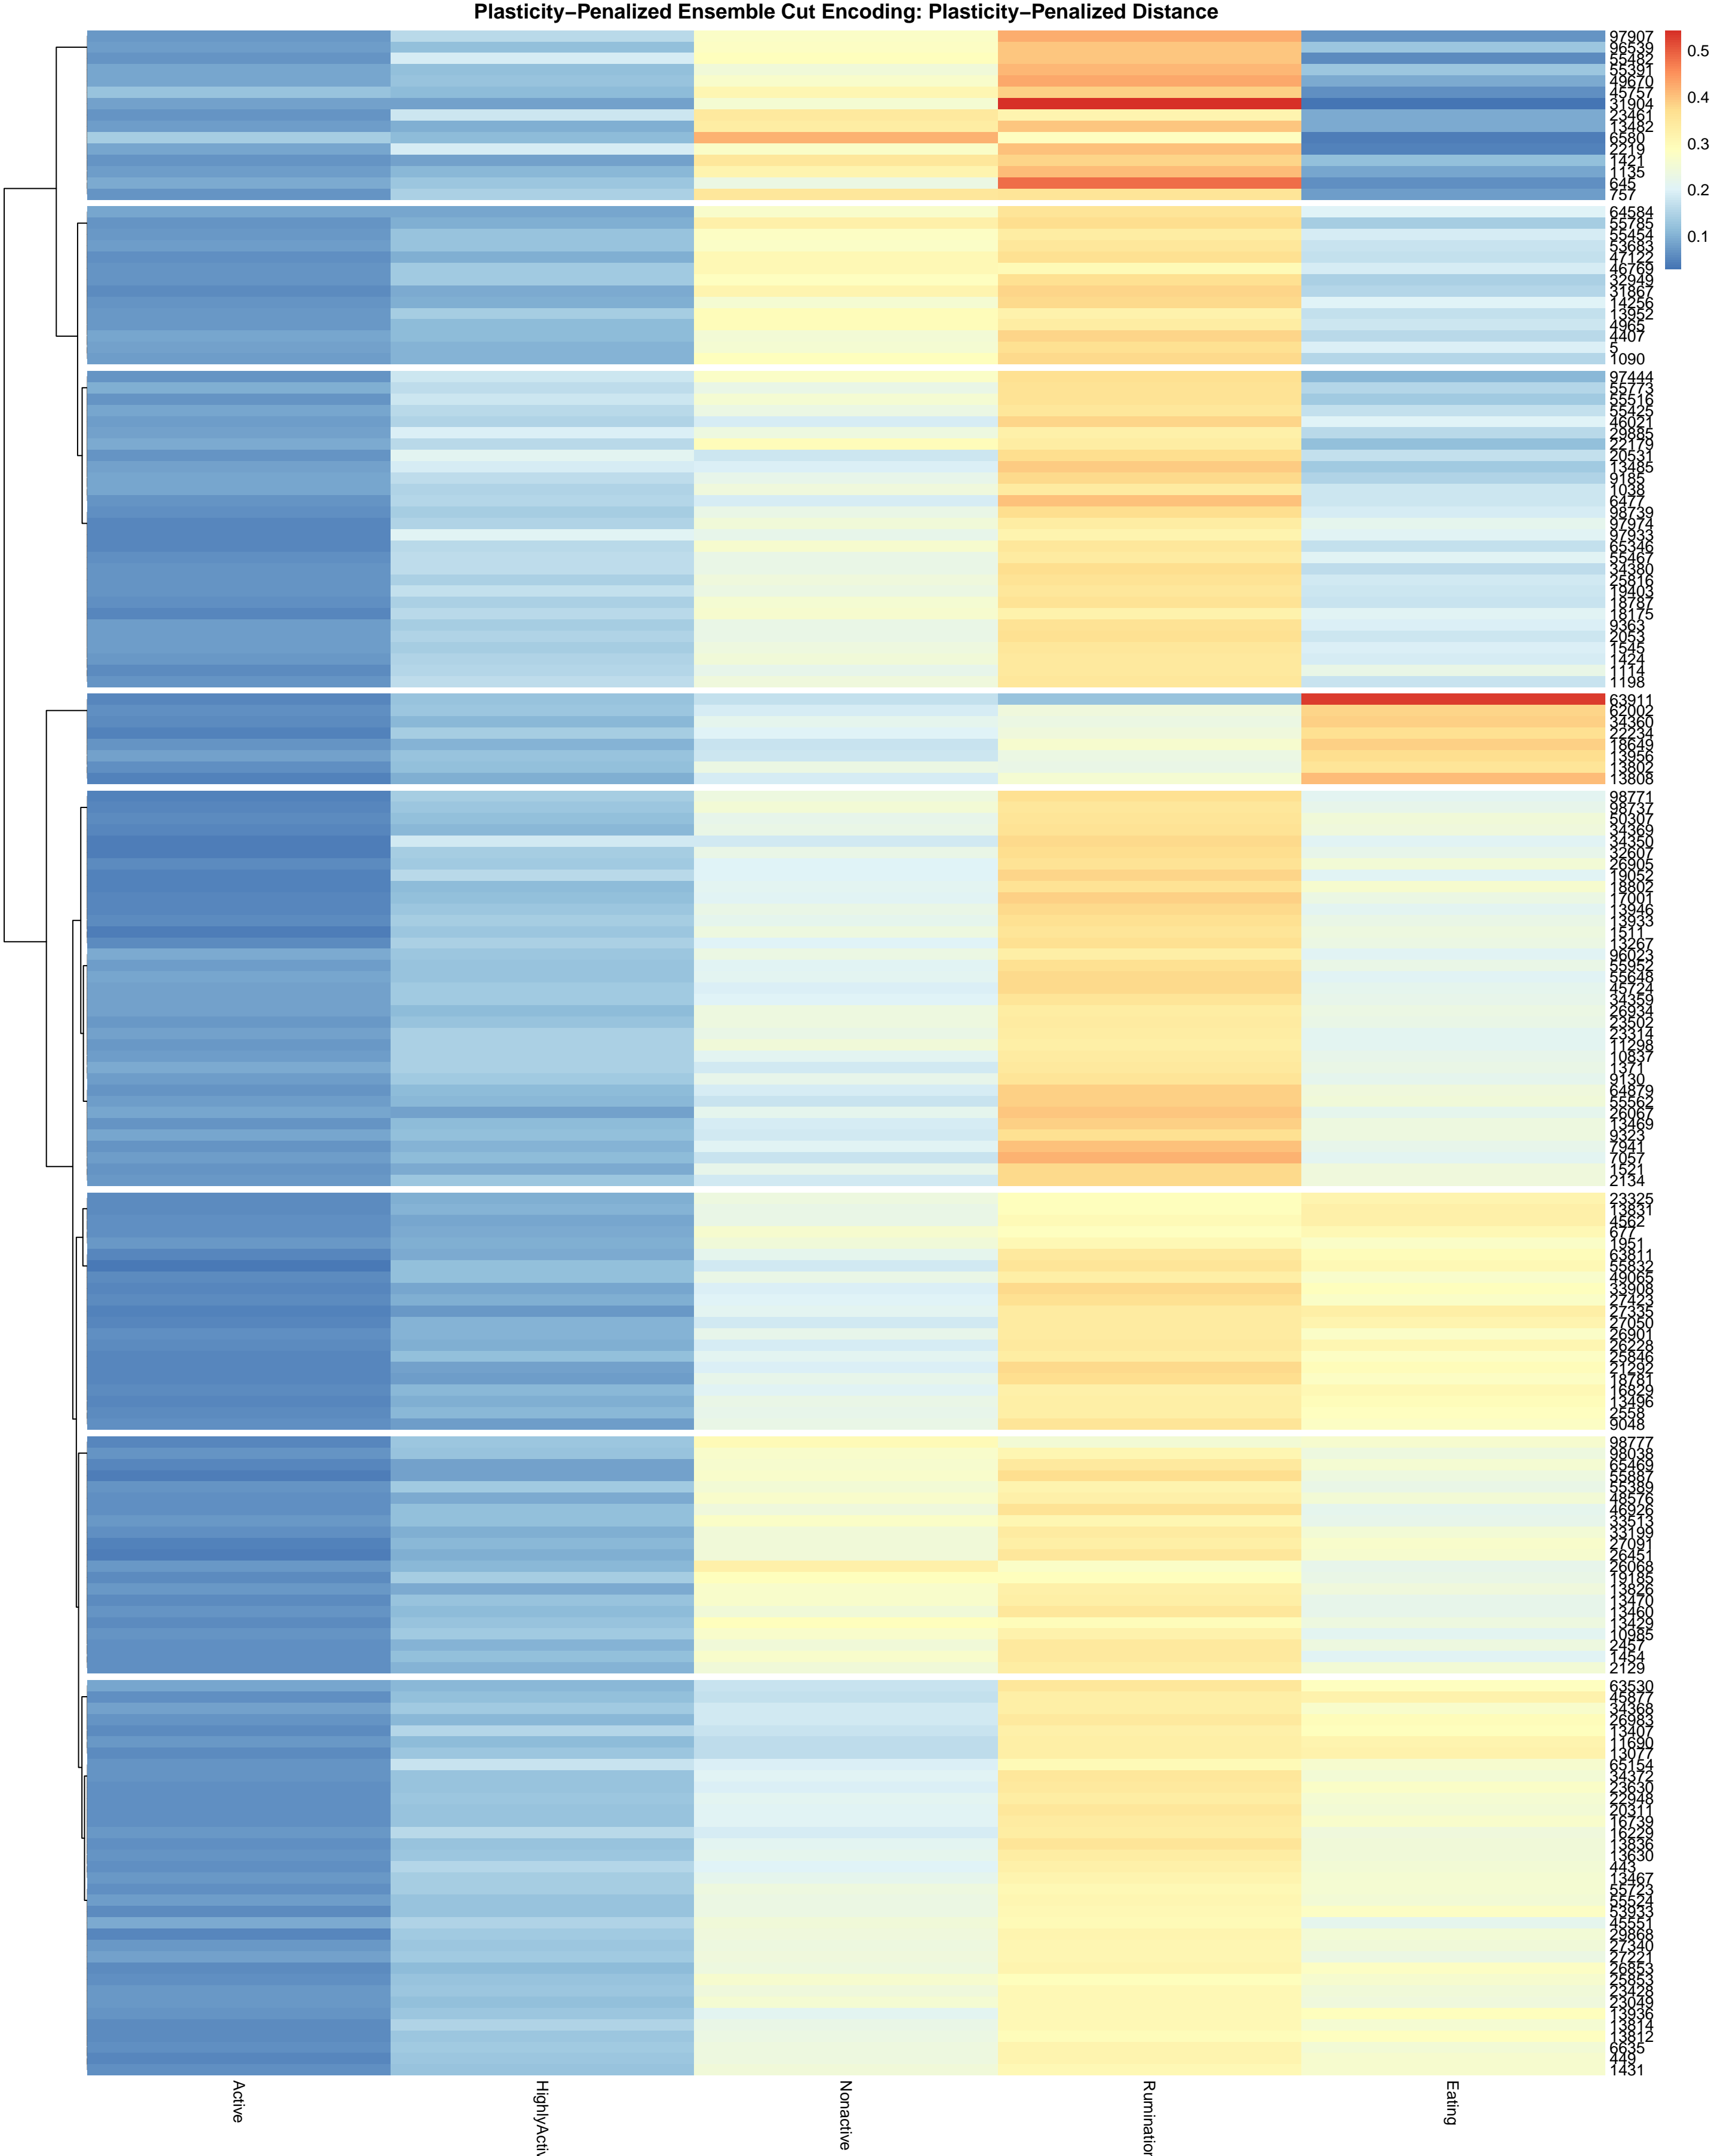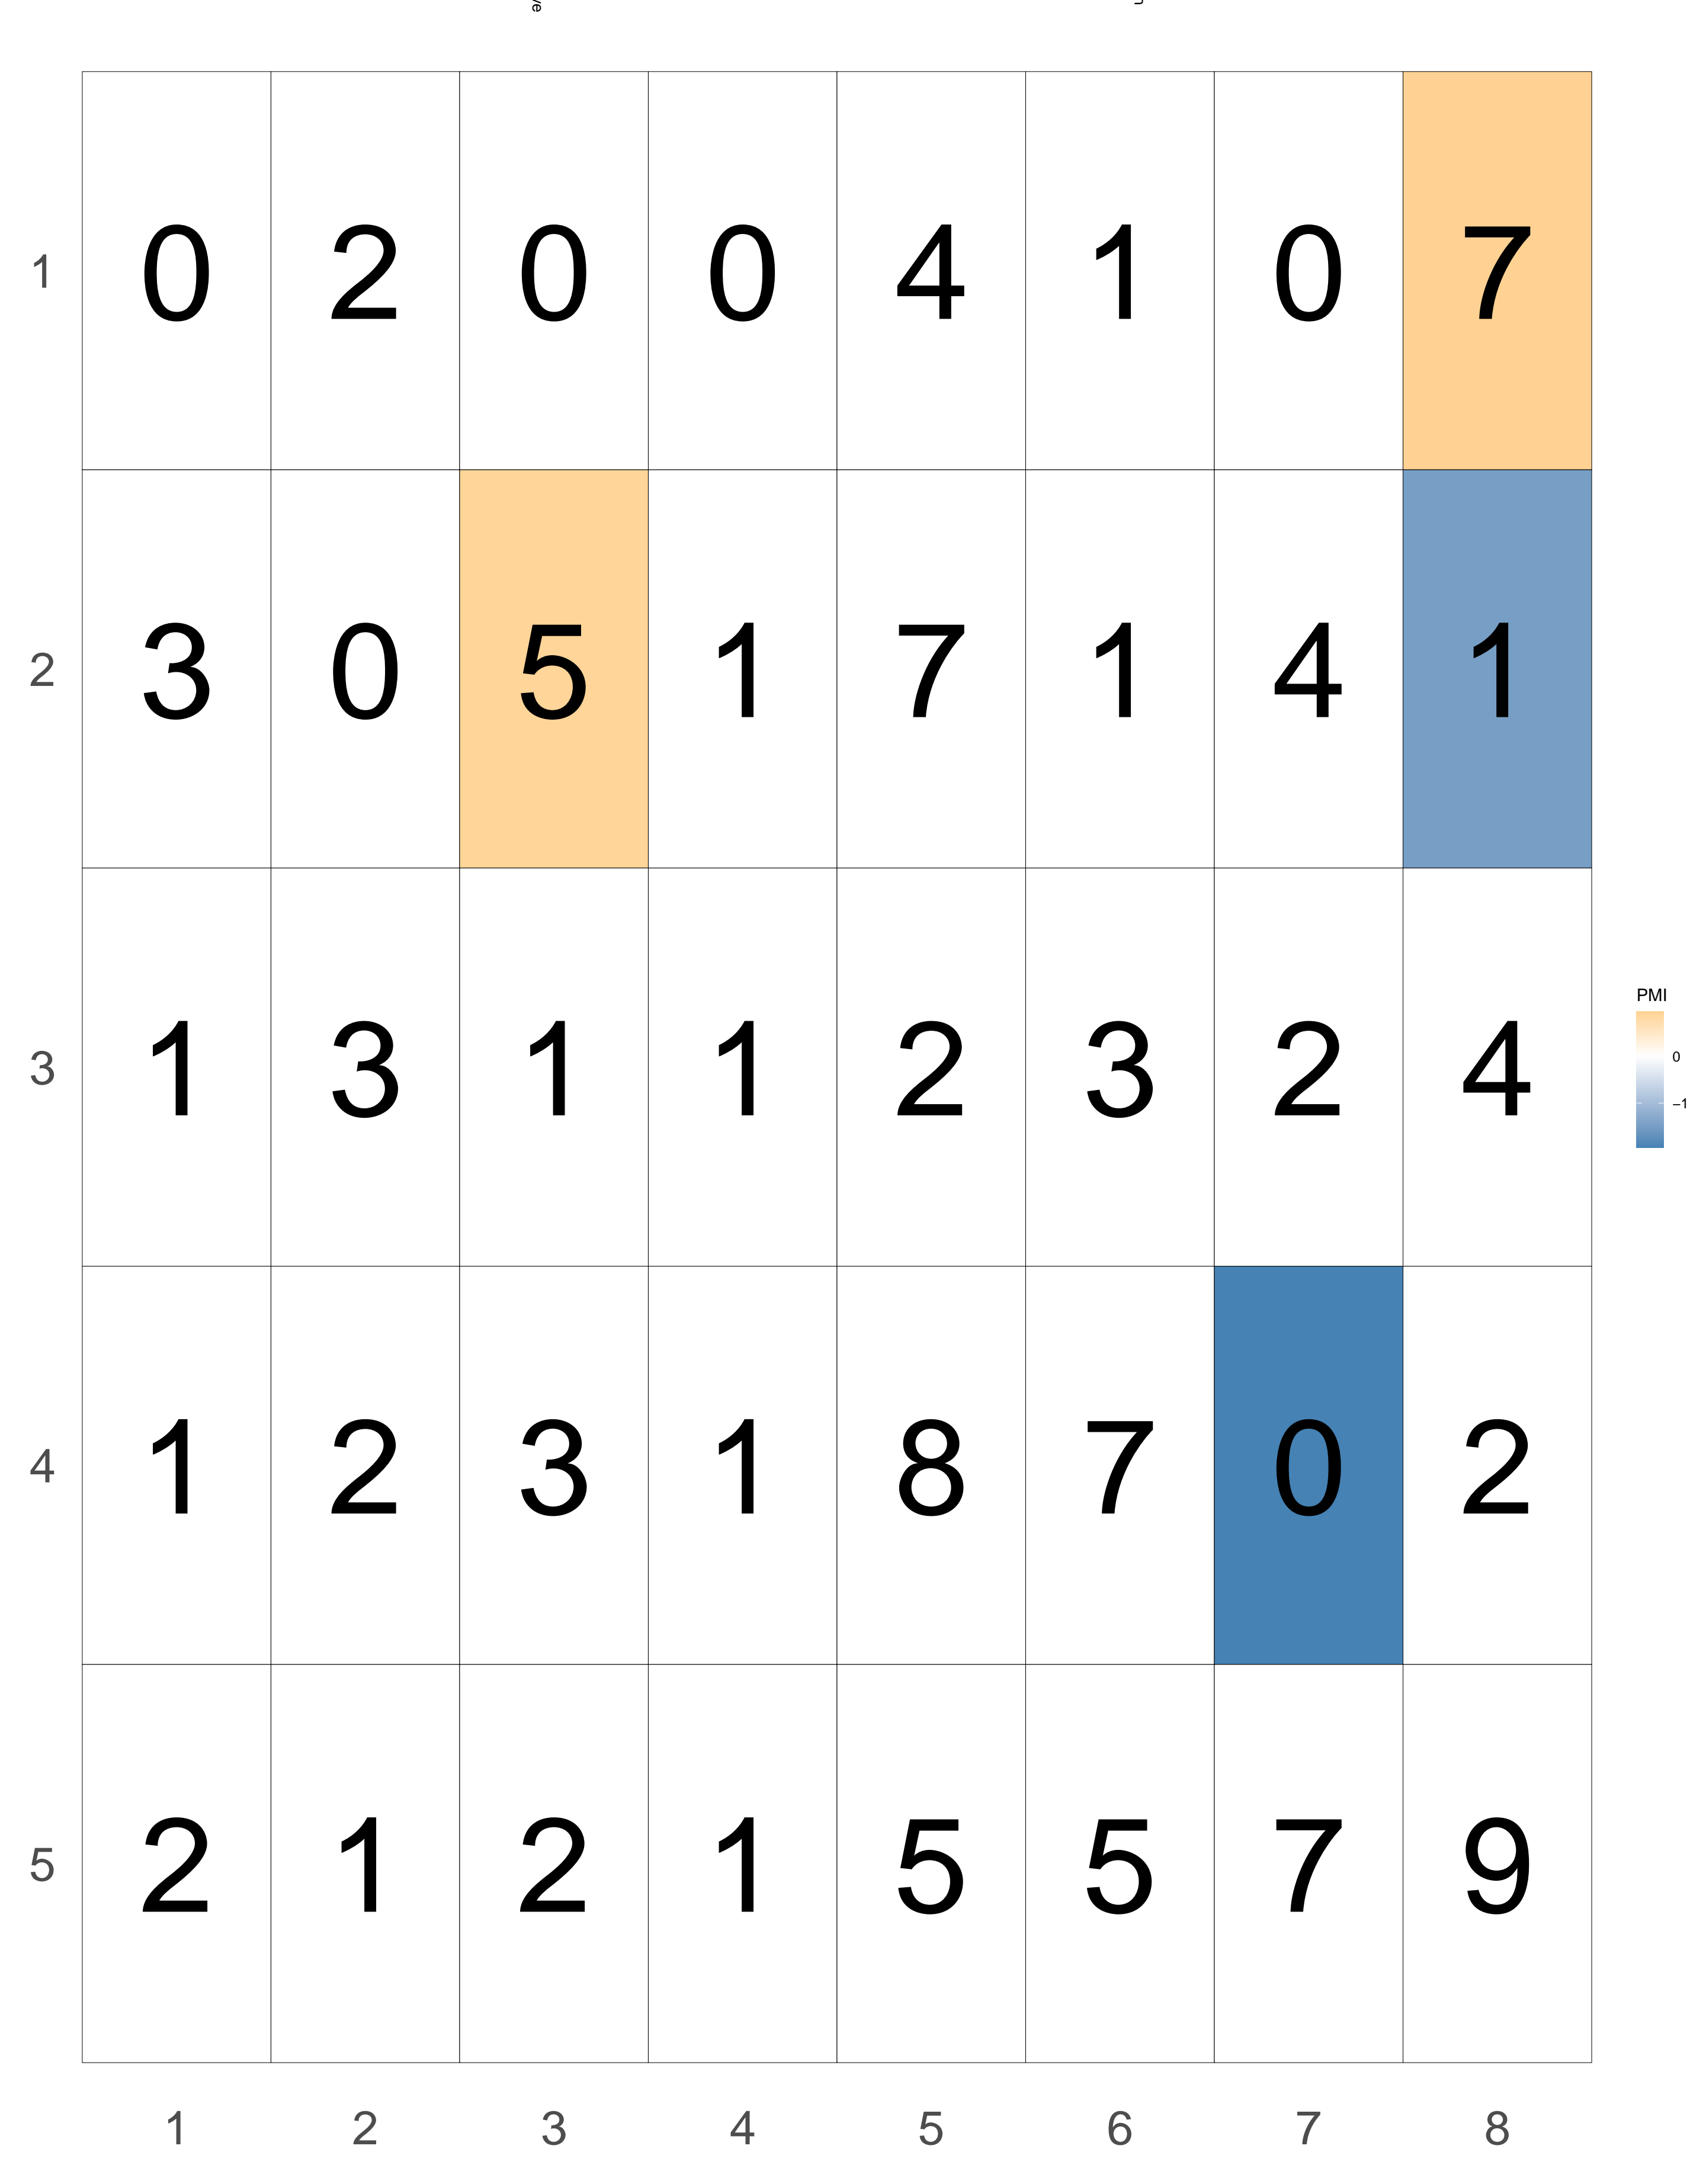

Supplement: s1 [file s1]

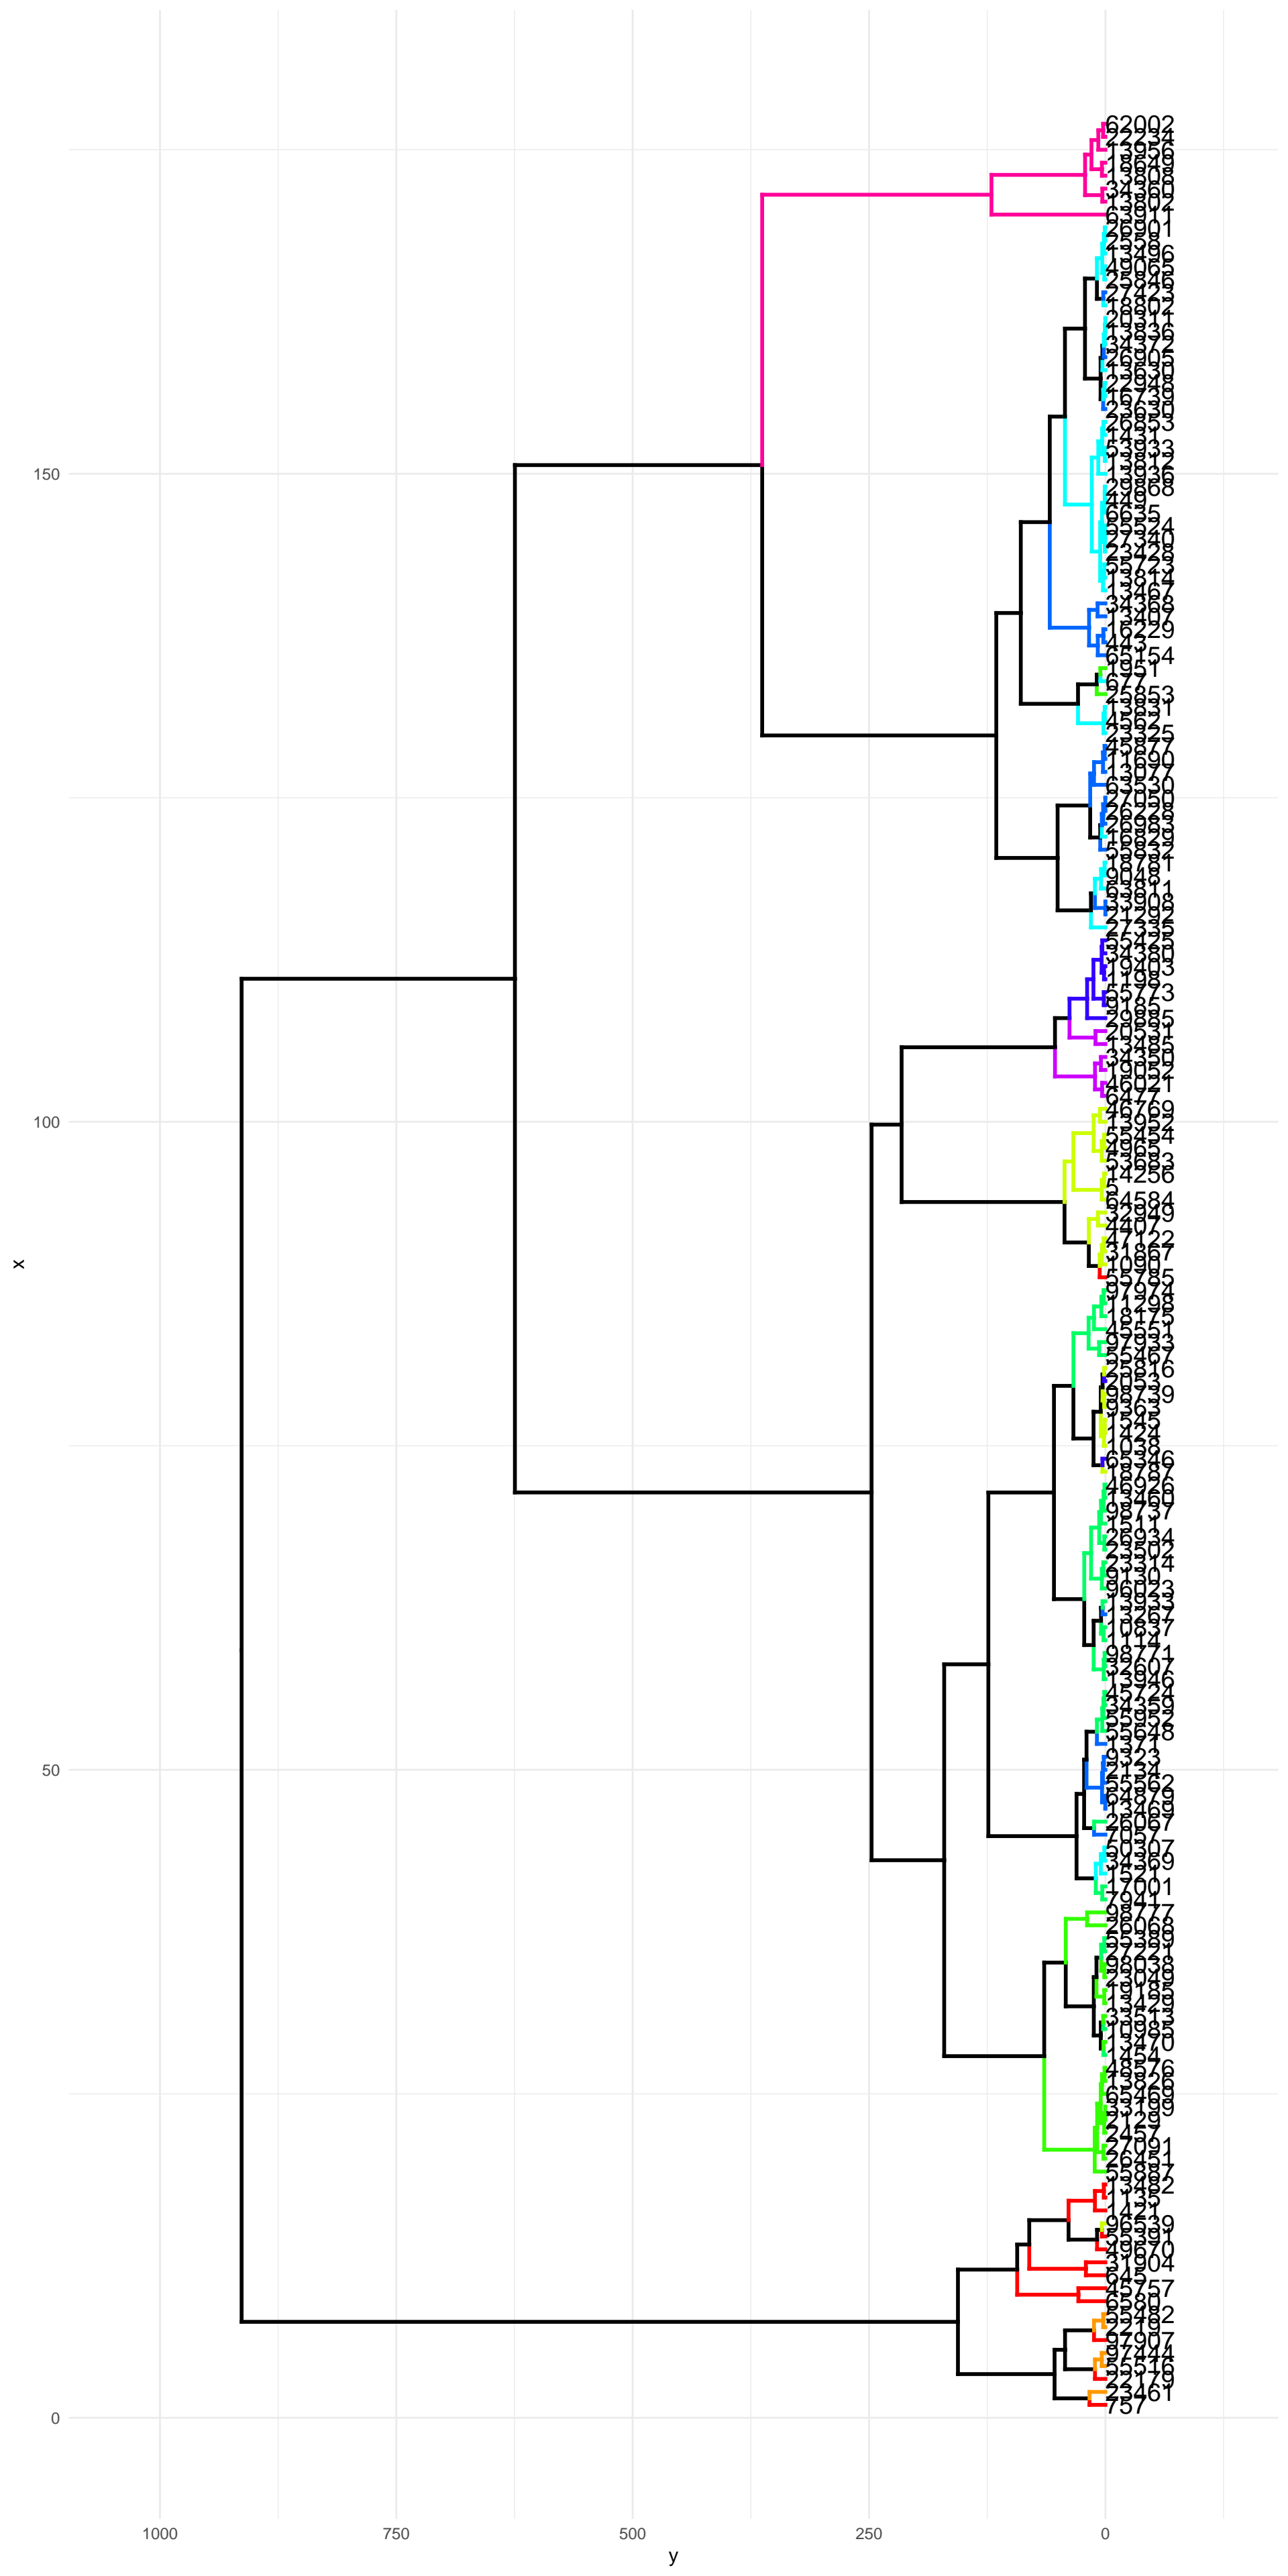

Supplement: s1 [file s1]

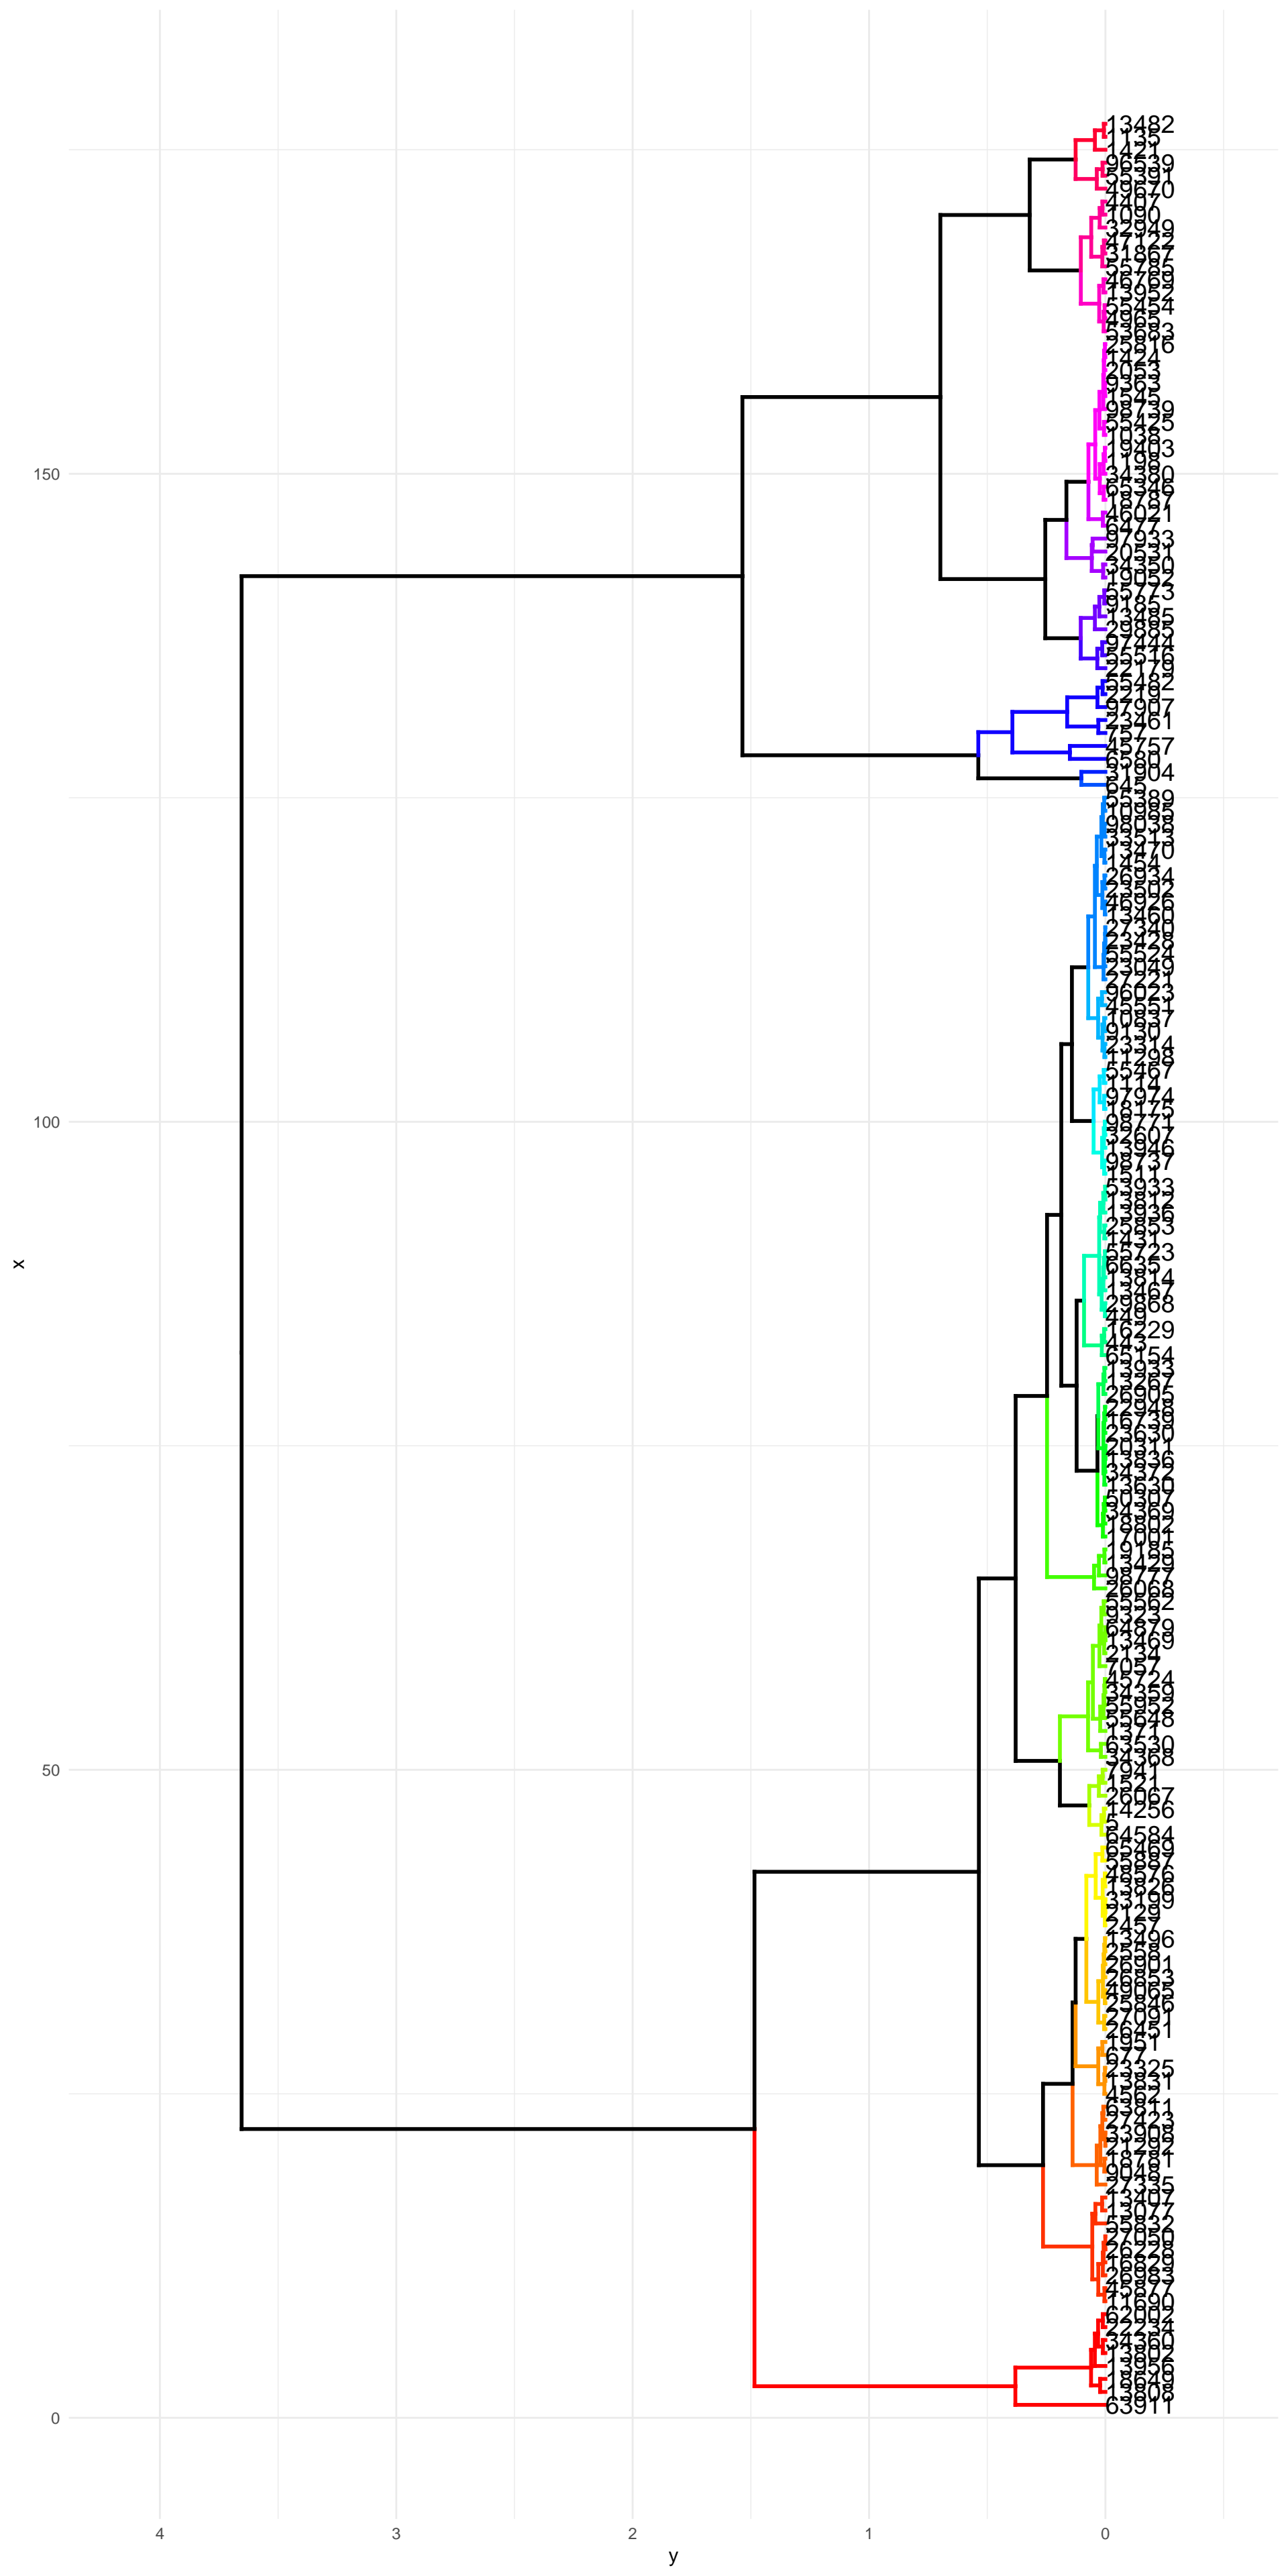

Supplement: s1 [file s1]

Plasticity-Penalized Ensemble Cut Encoding: Euclidean Distance

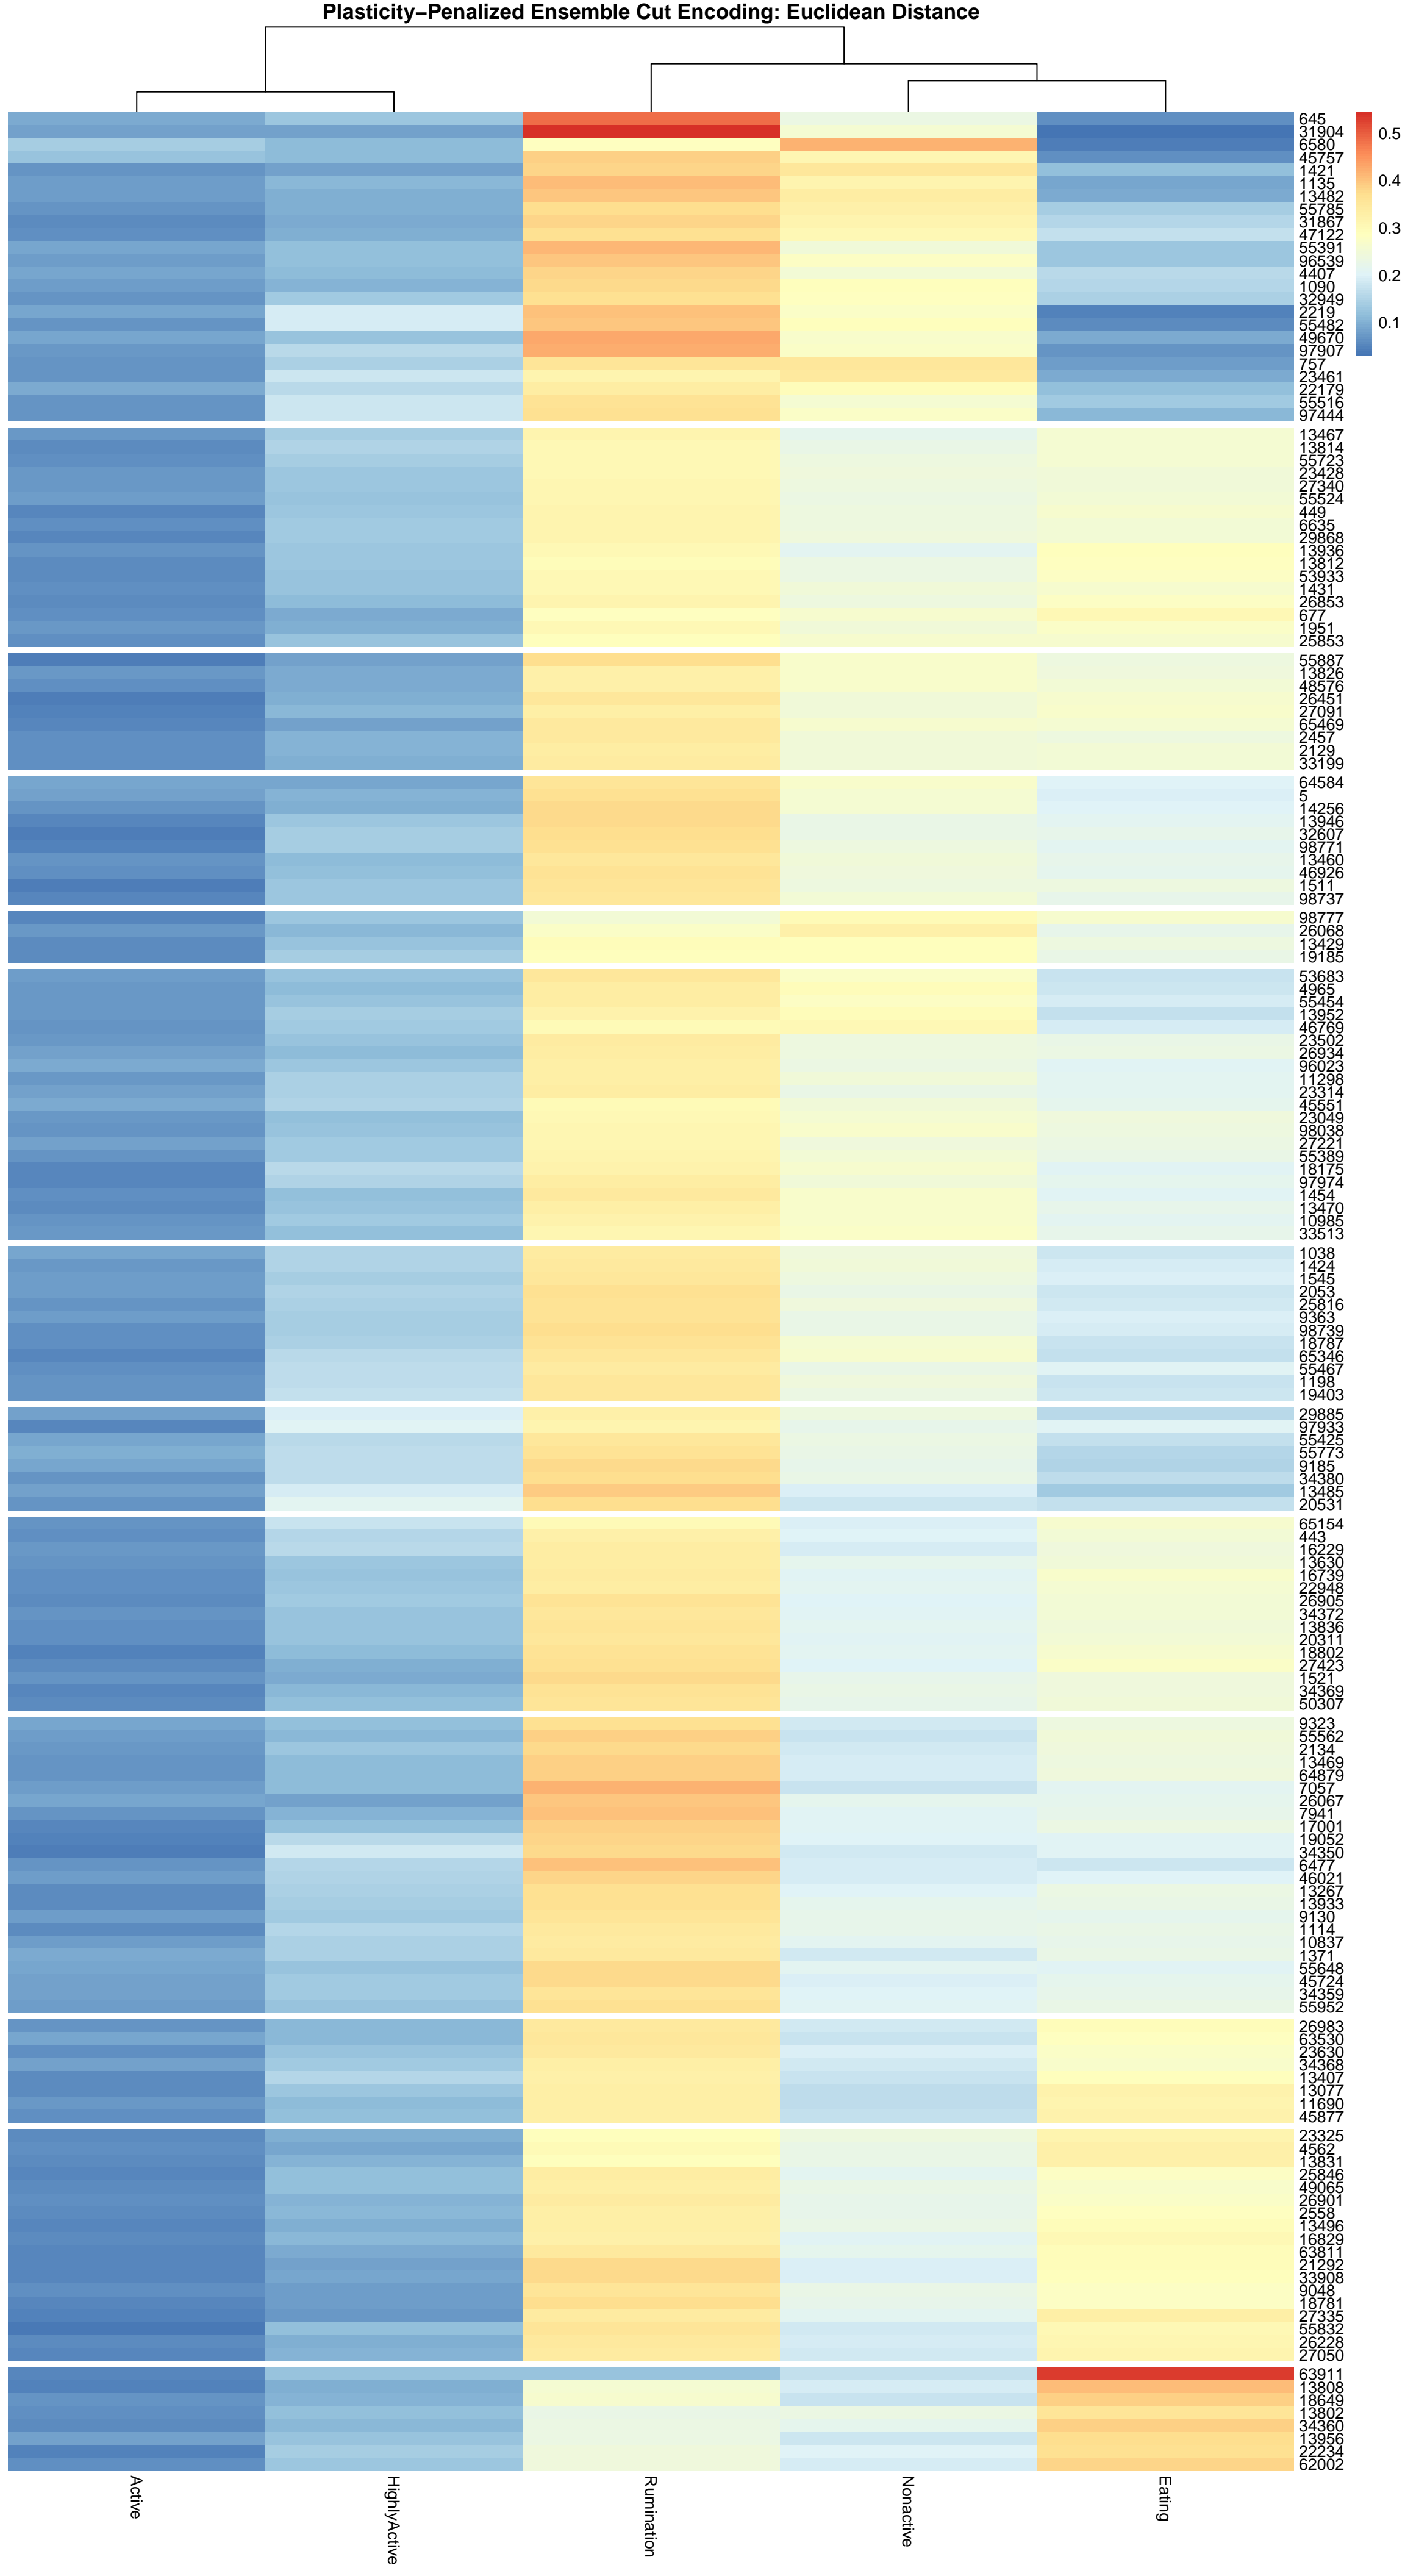

Supplement: s1 [file s1]

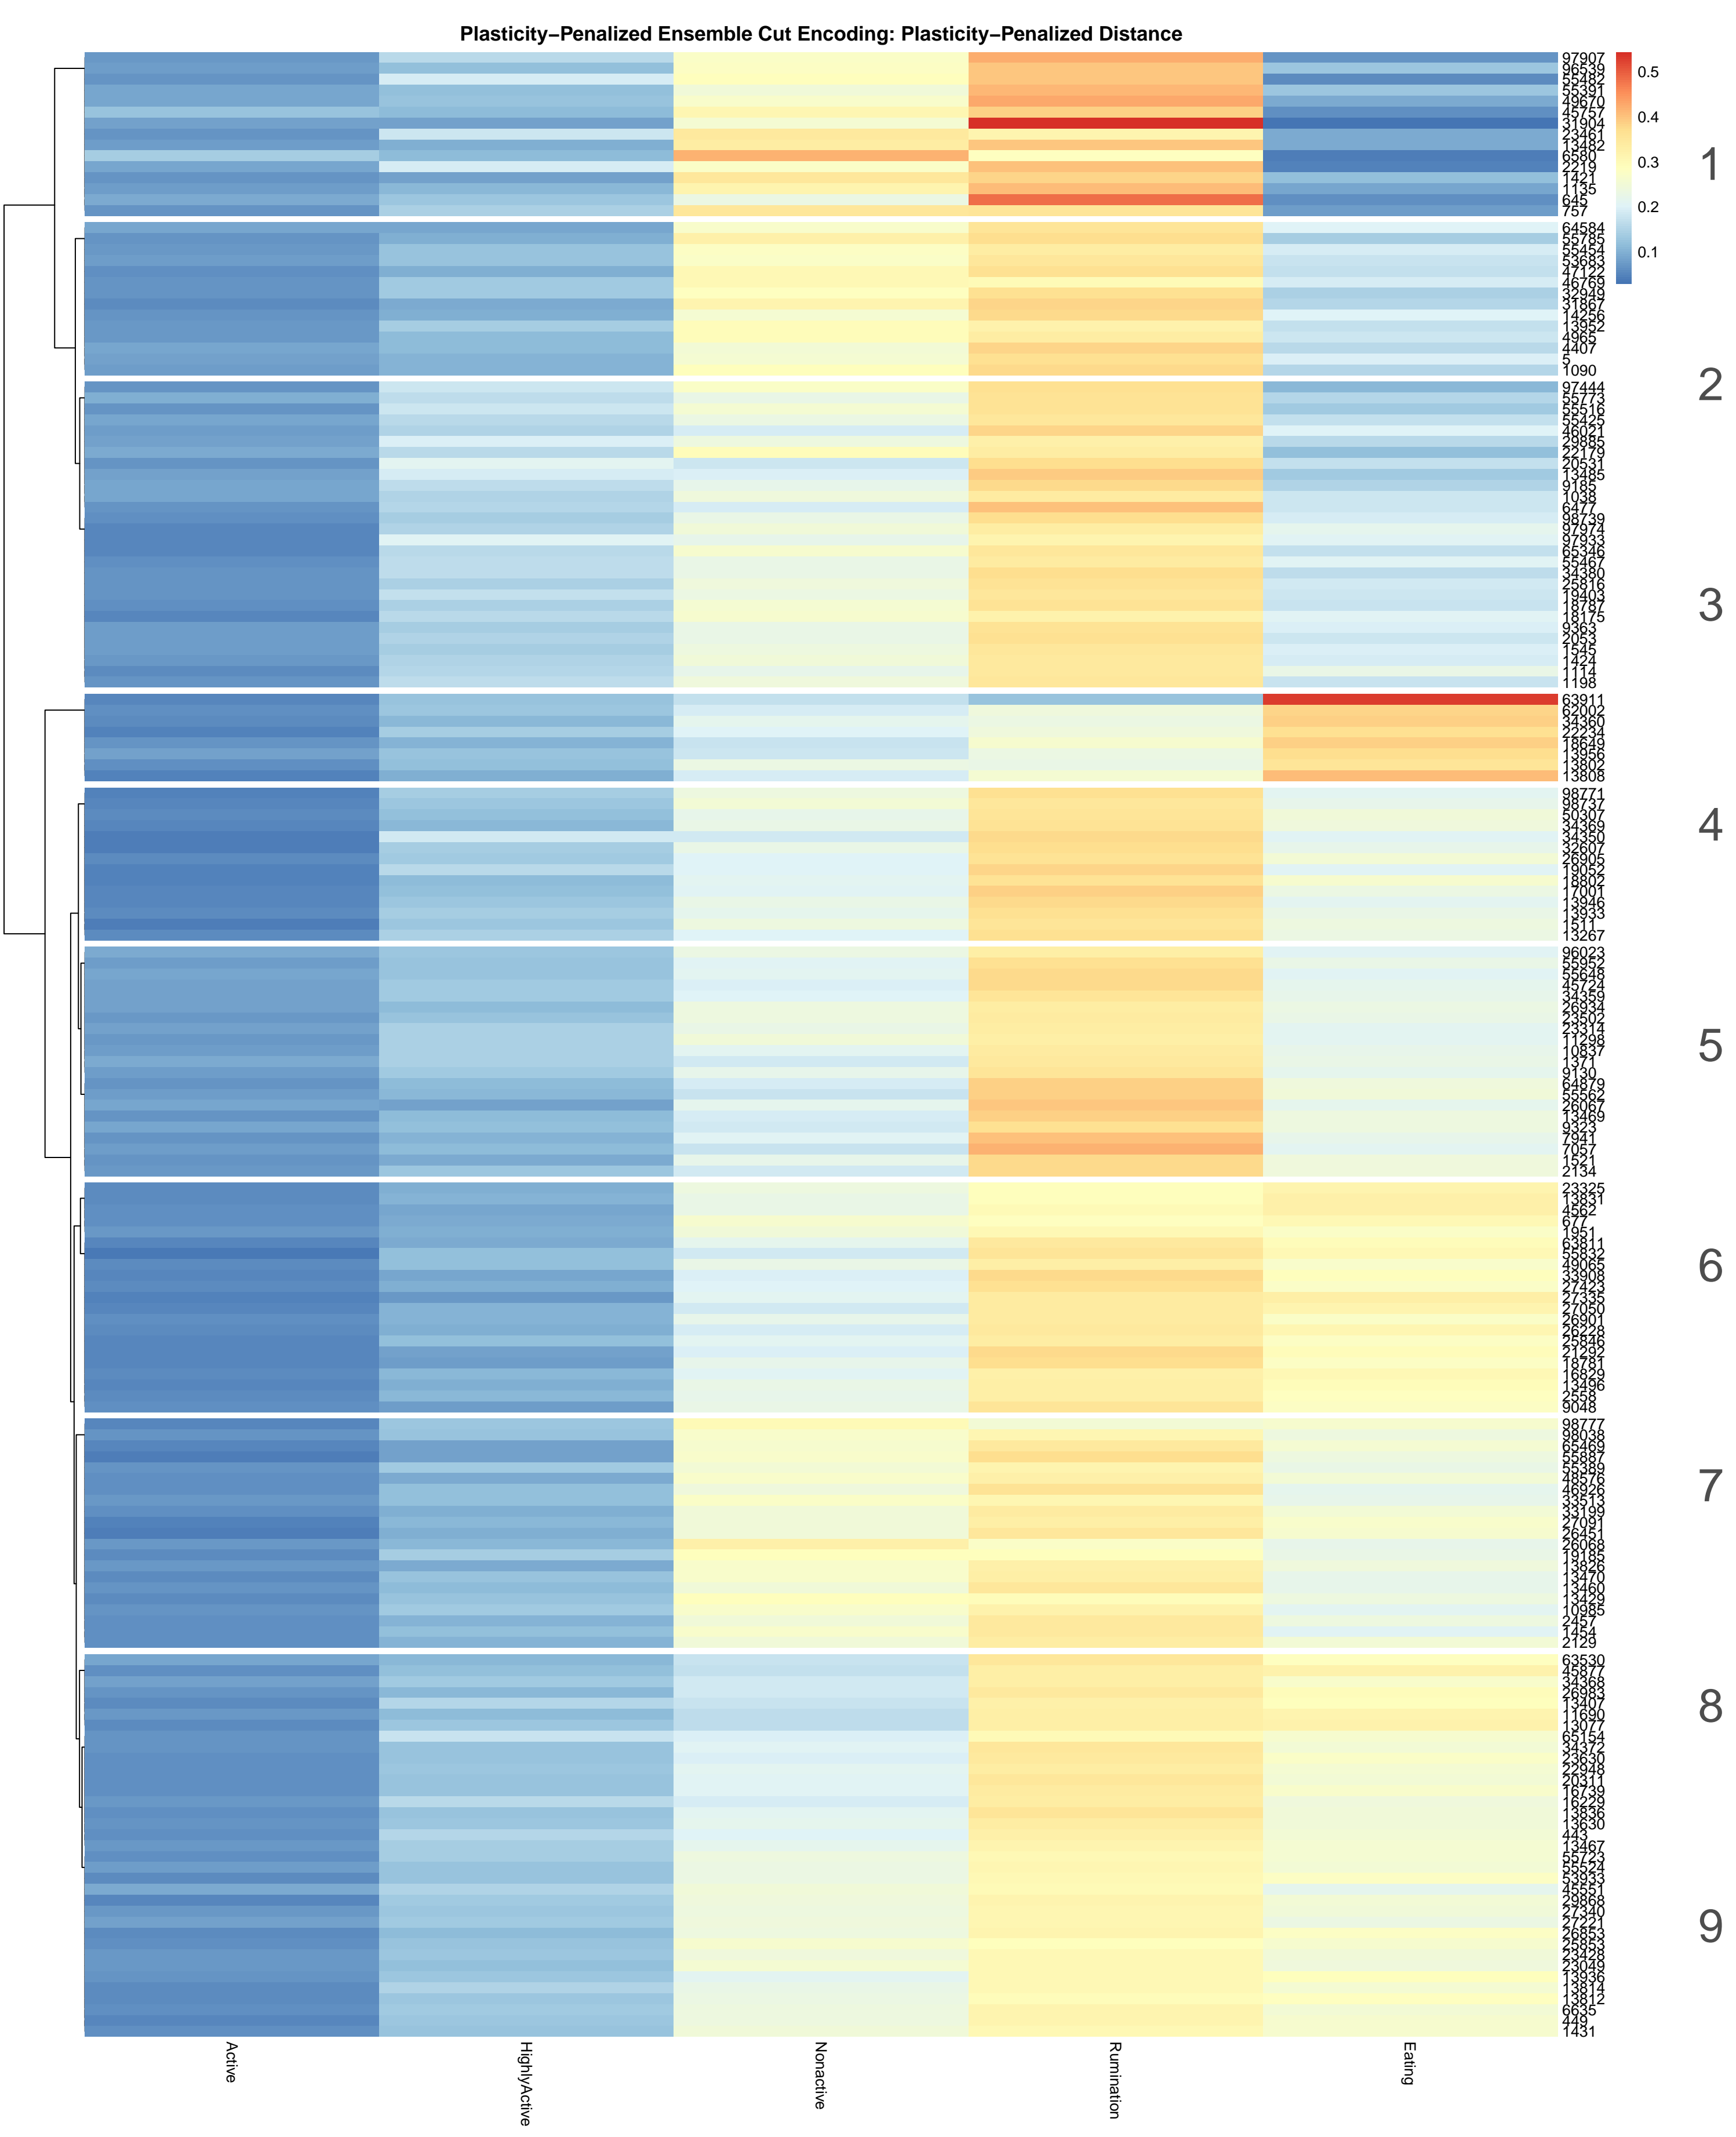

|         |      |
|---------|------|
| 12      | 3    |
| 12      | 2    |
| 15      | 12   |
| 4       | 4    |
| 14      | 0    |
| 16      | 5    |
| 19      | 2    |
| 16      | 5    |
| 29      | 6    |
| Healthy | Sick |

Supplement: s1 [file s1]

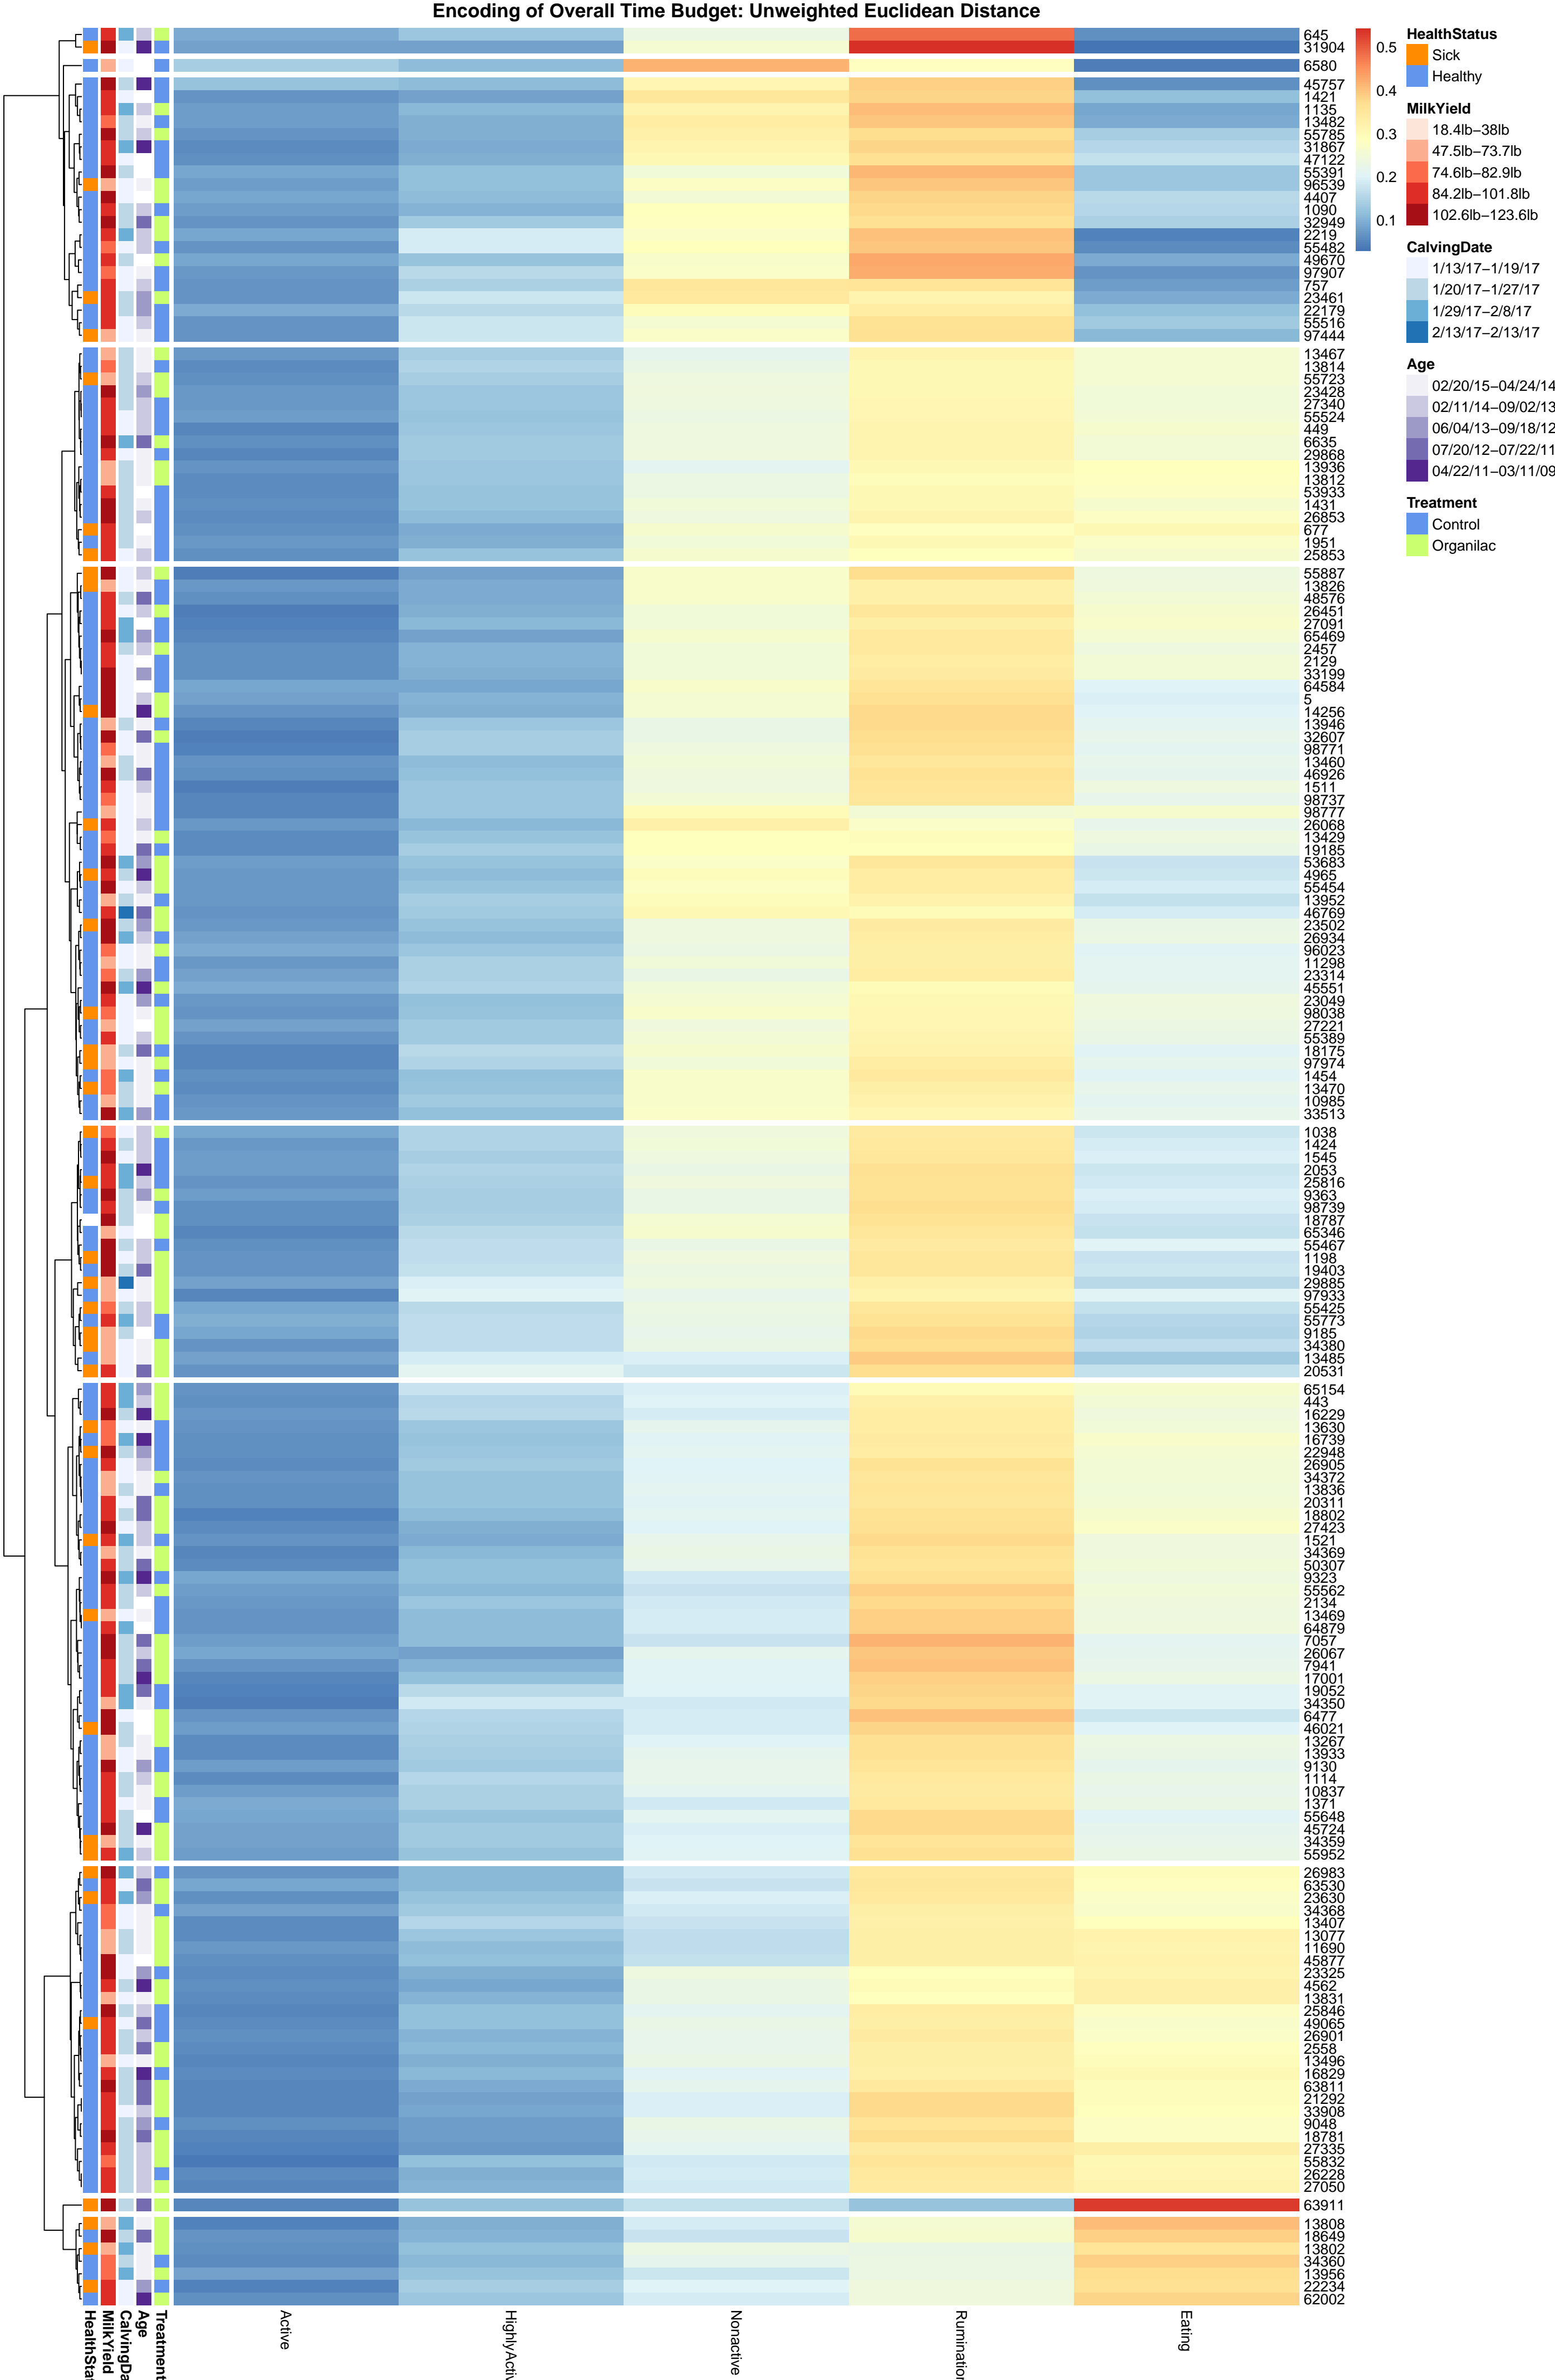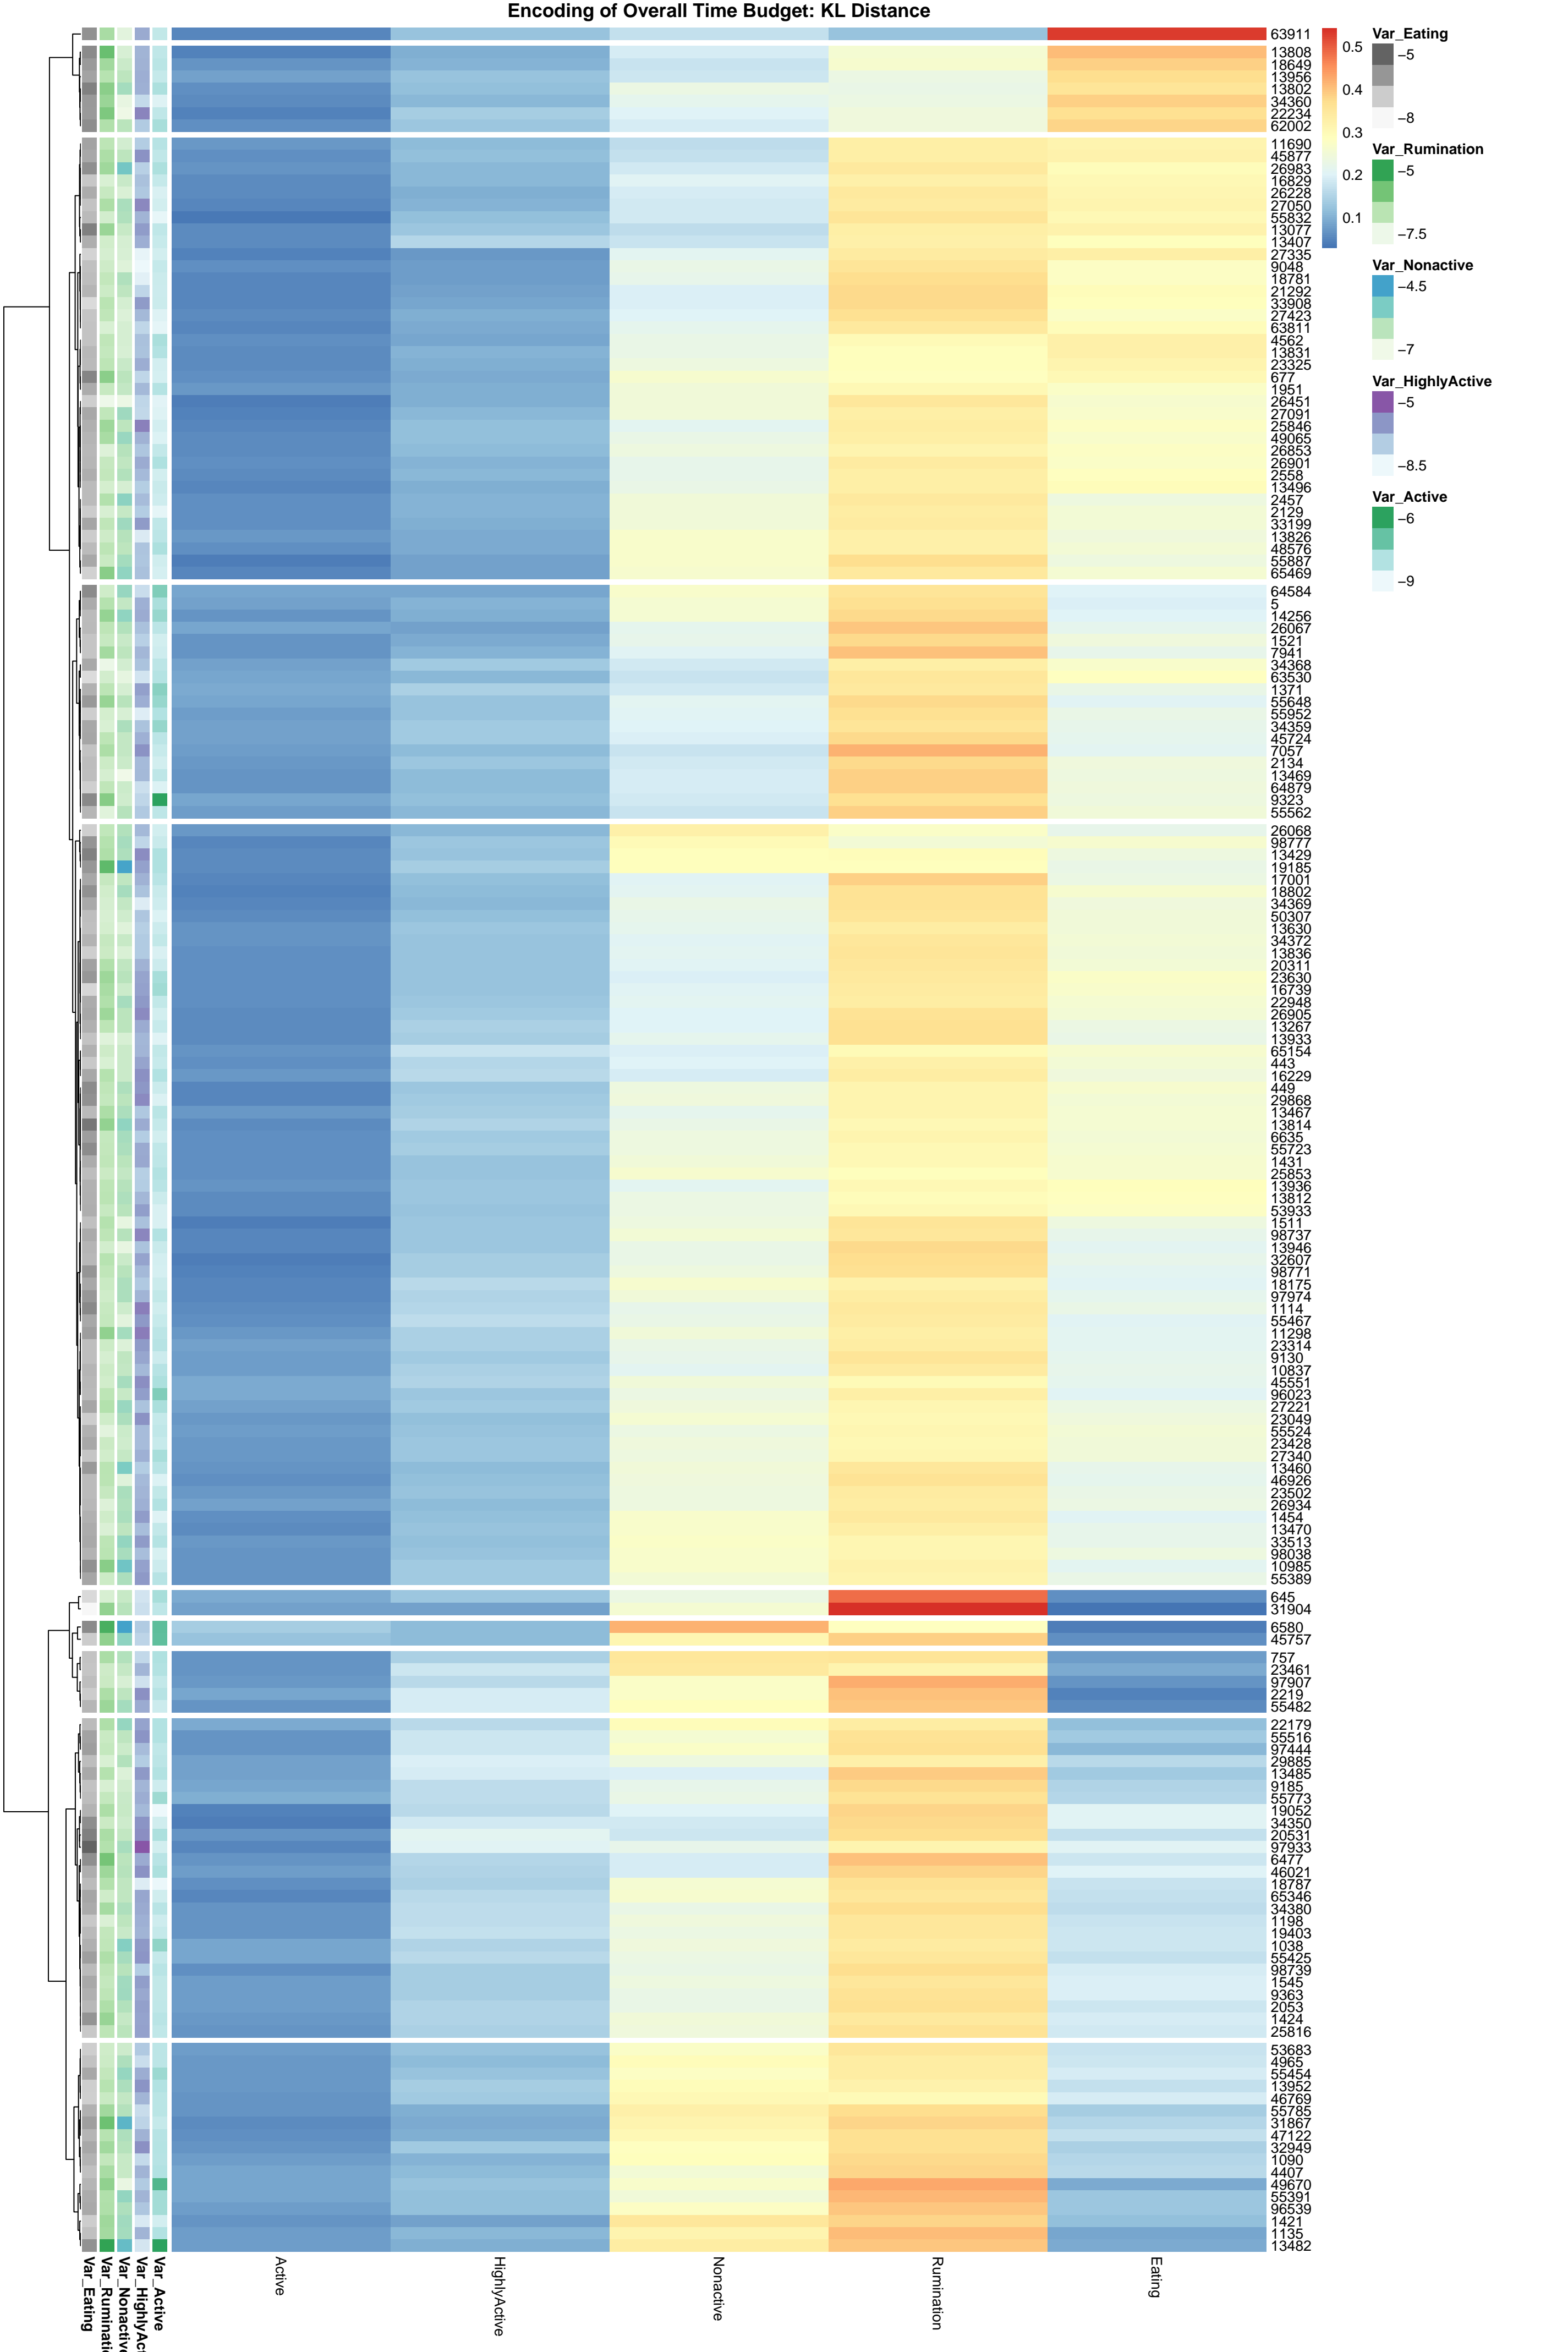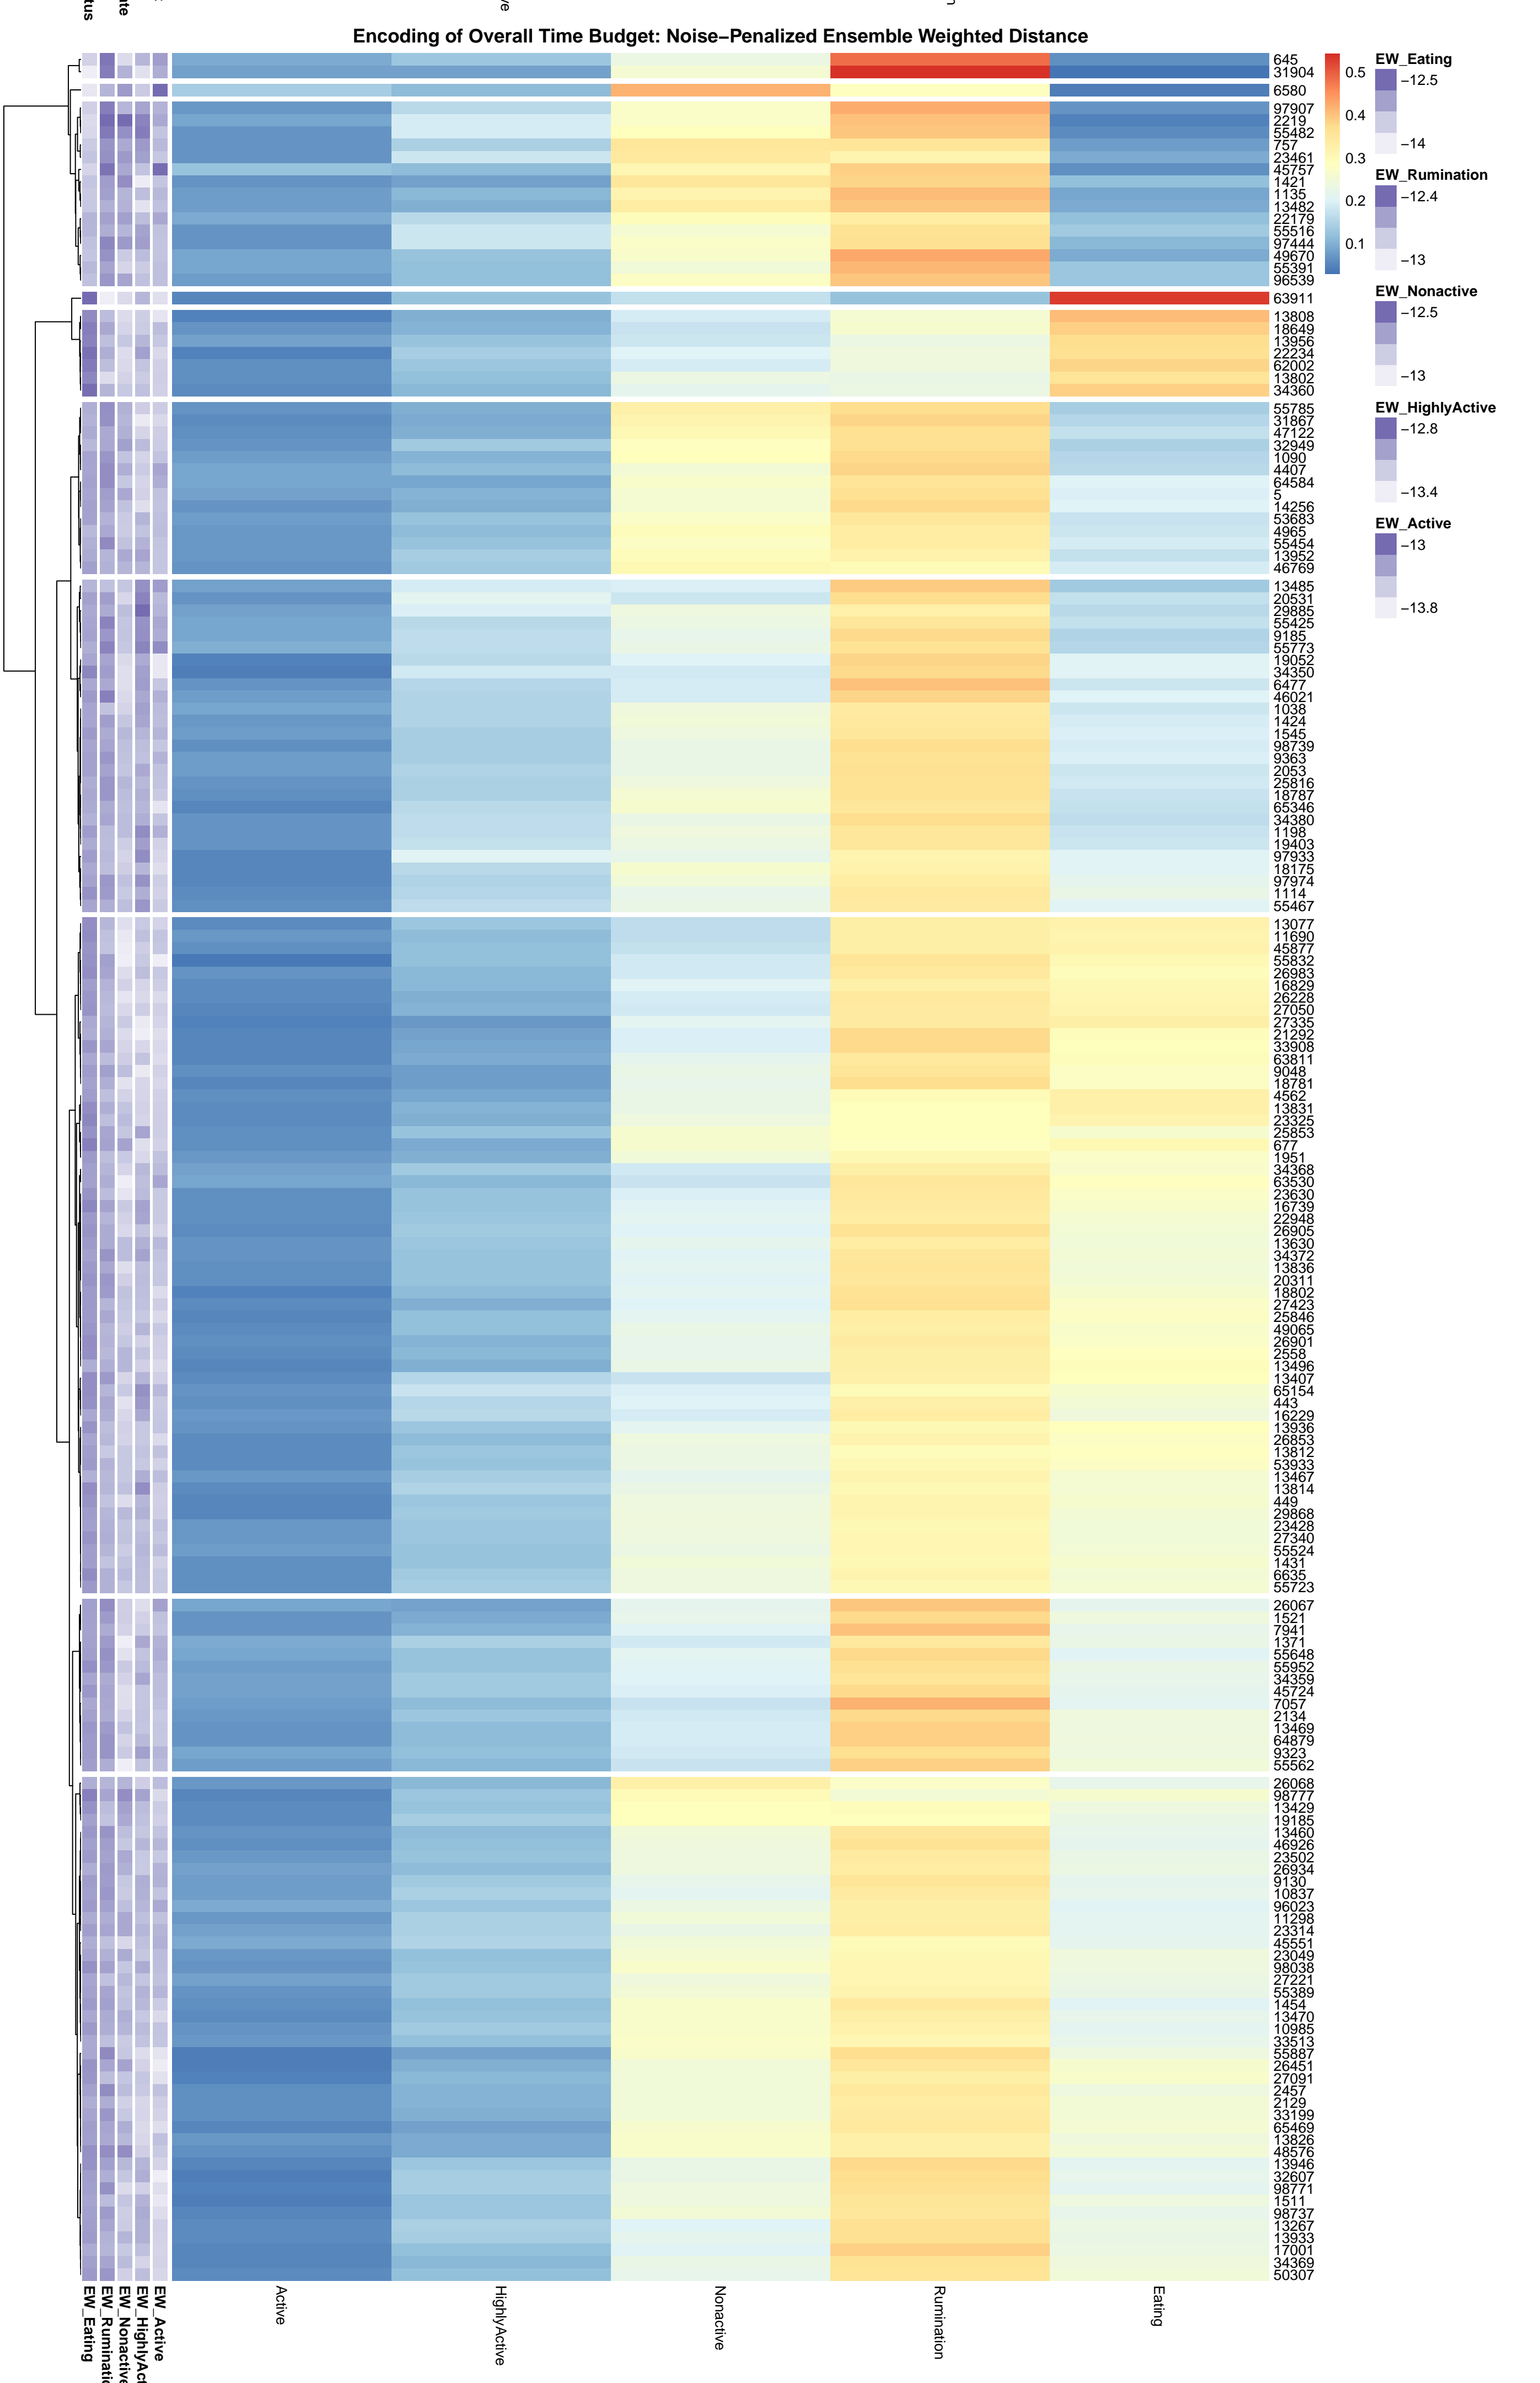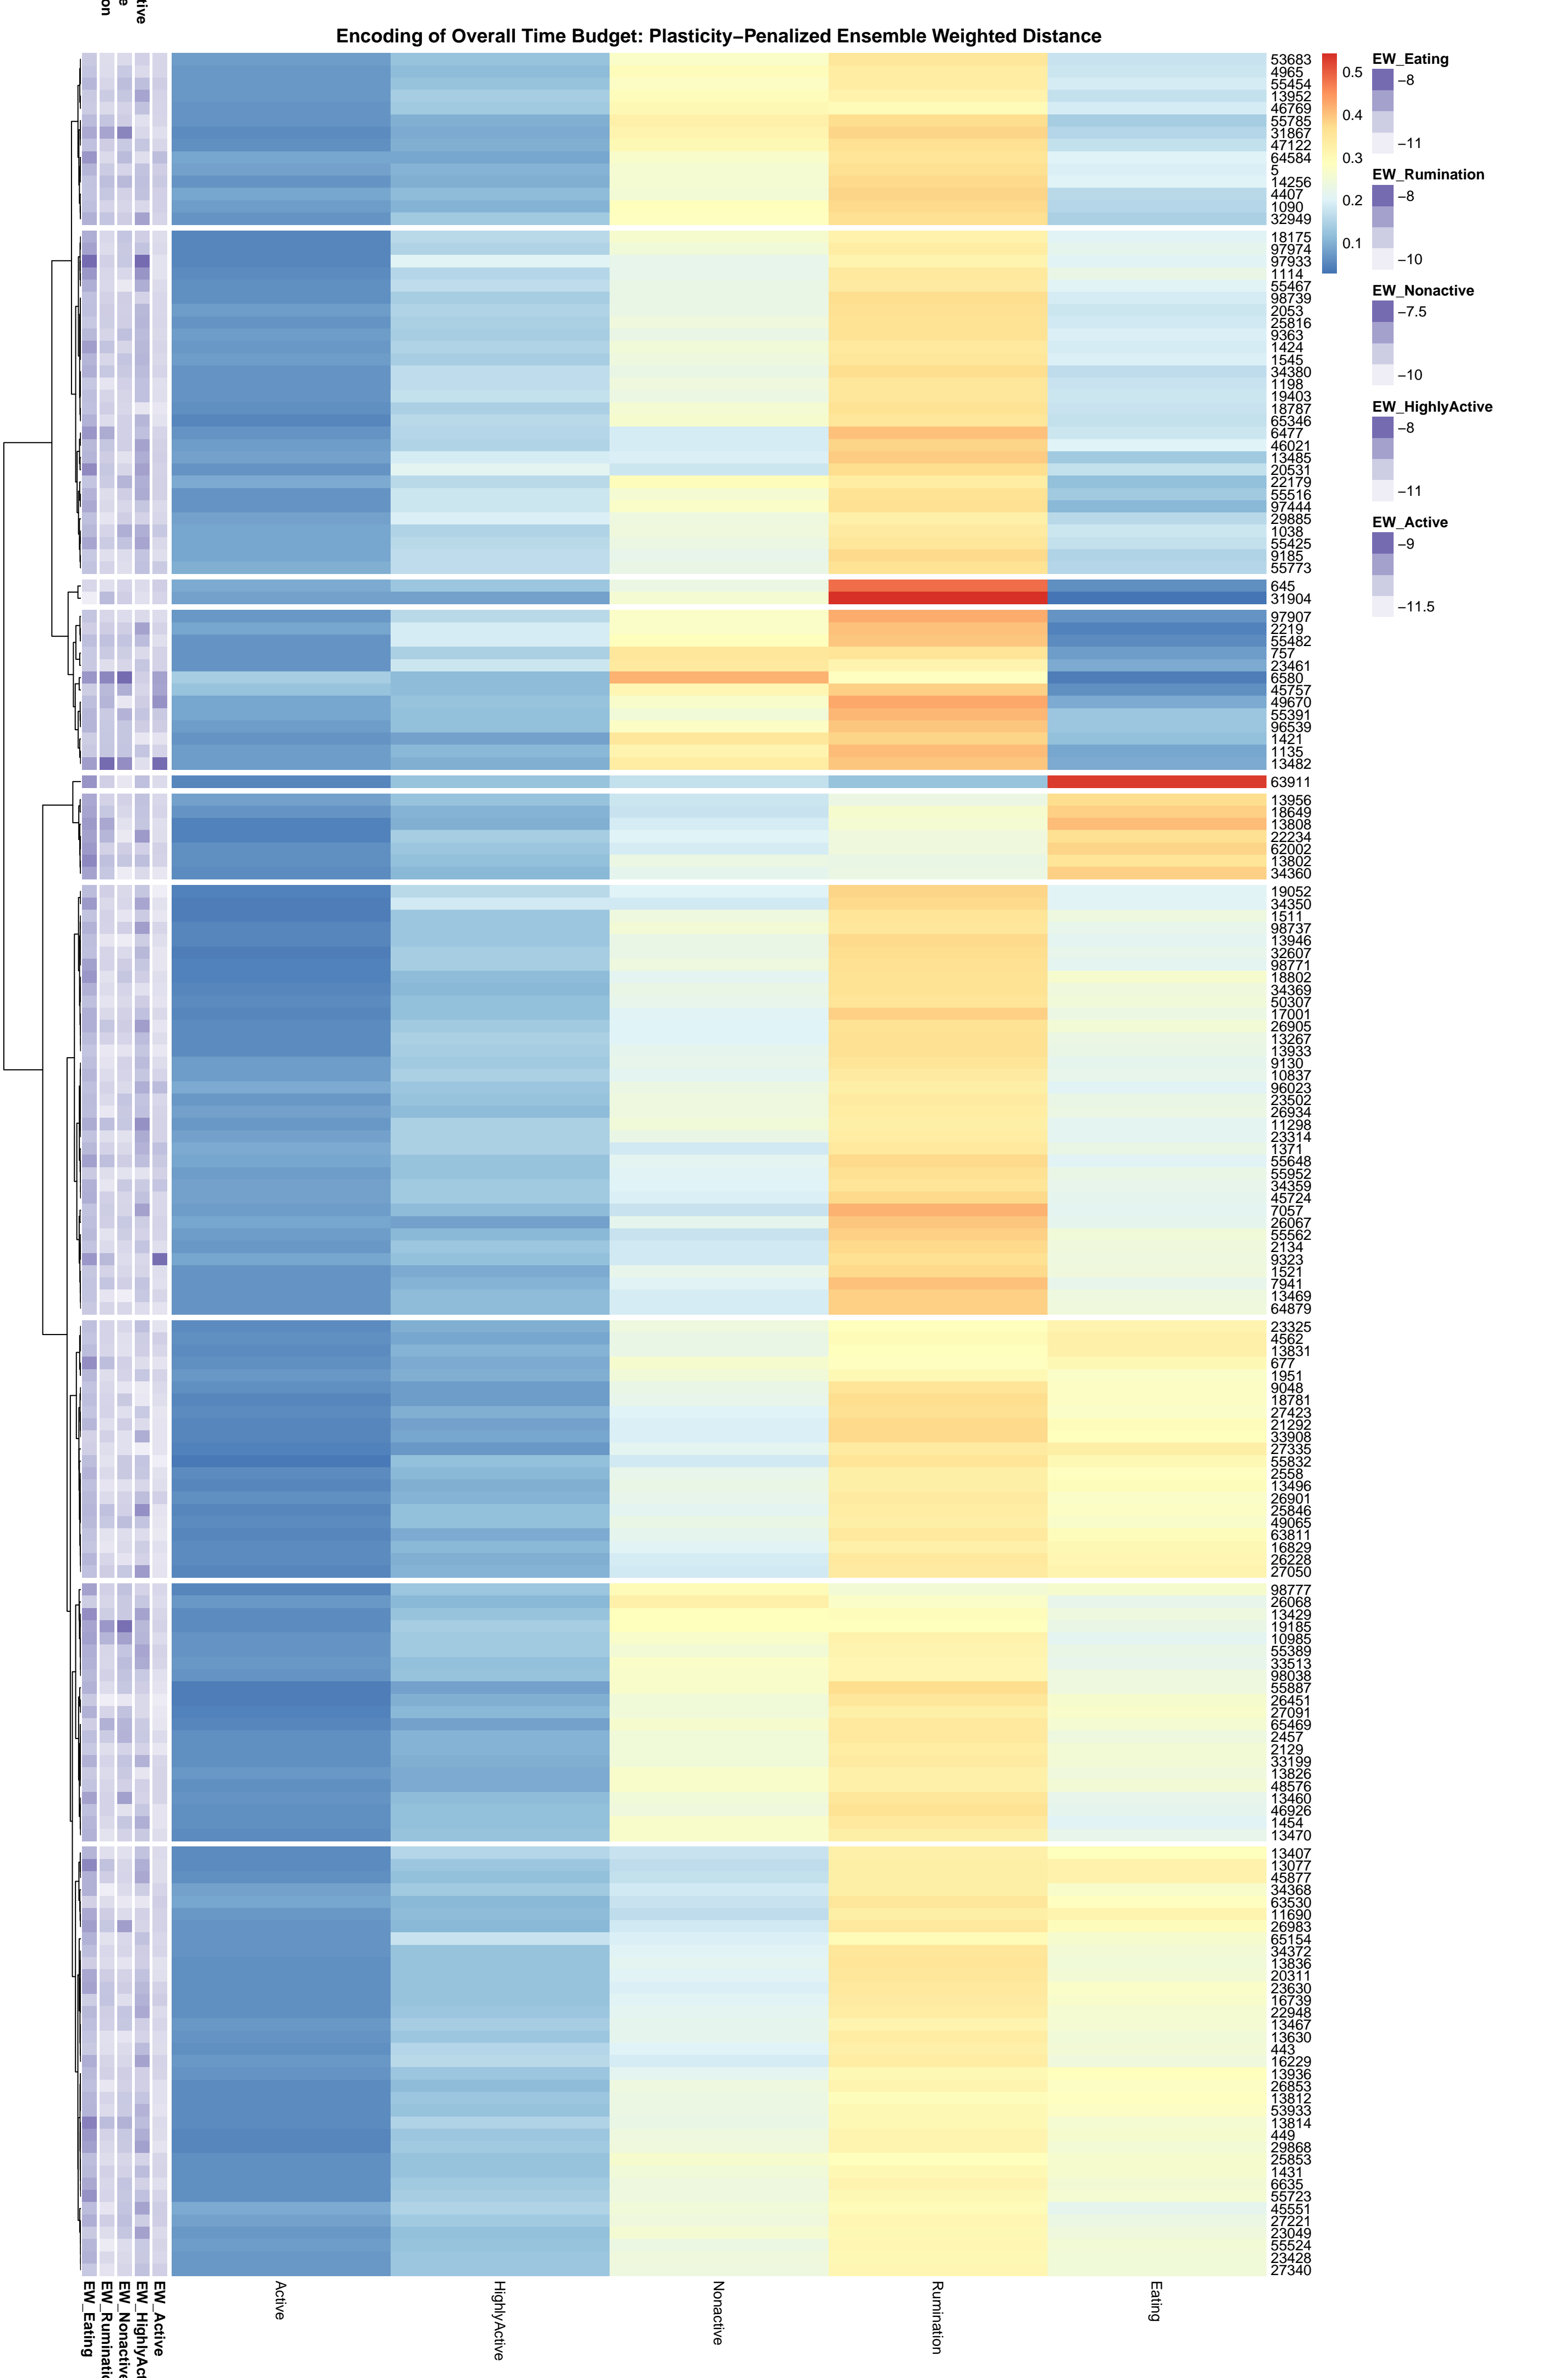

Supplement: s1 [file s1]

### Noise–Penalized Ensemble Cut Encoding: Noise–Penalized Distance

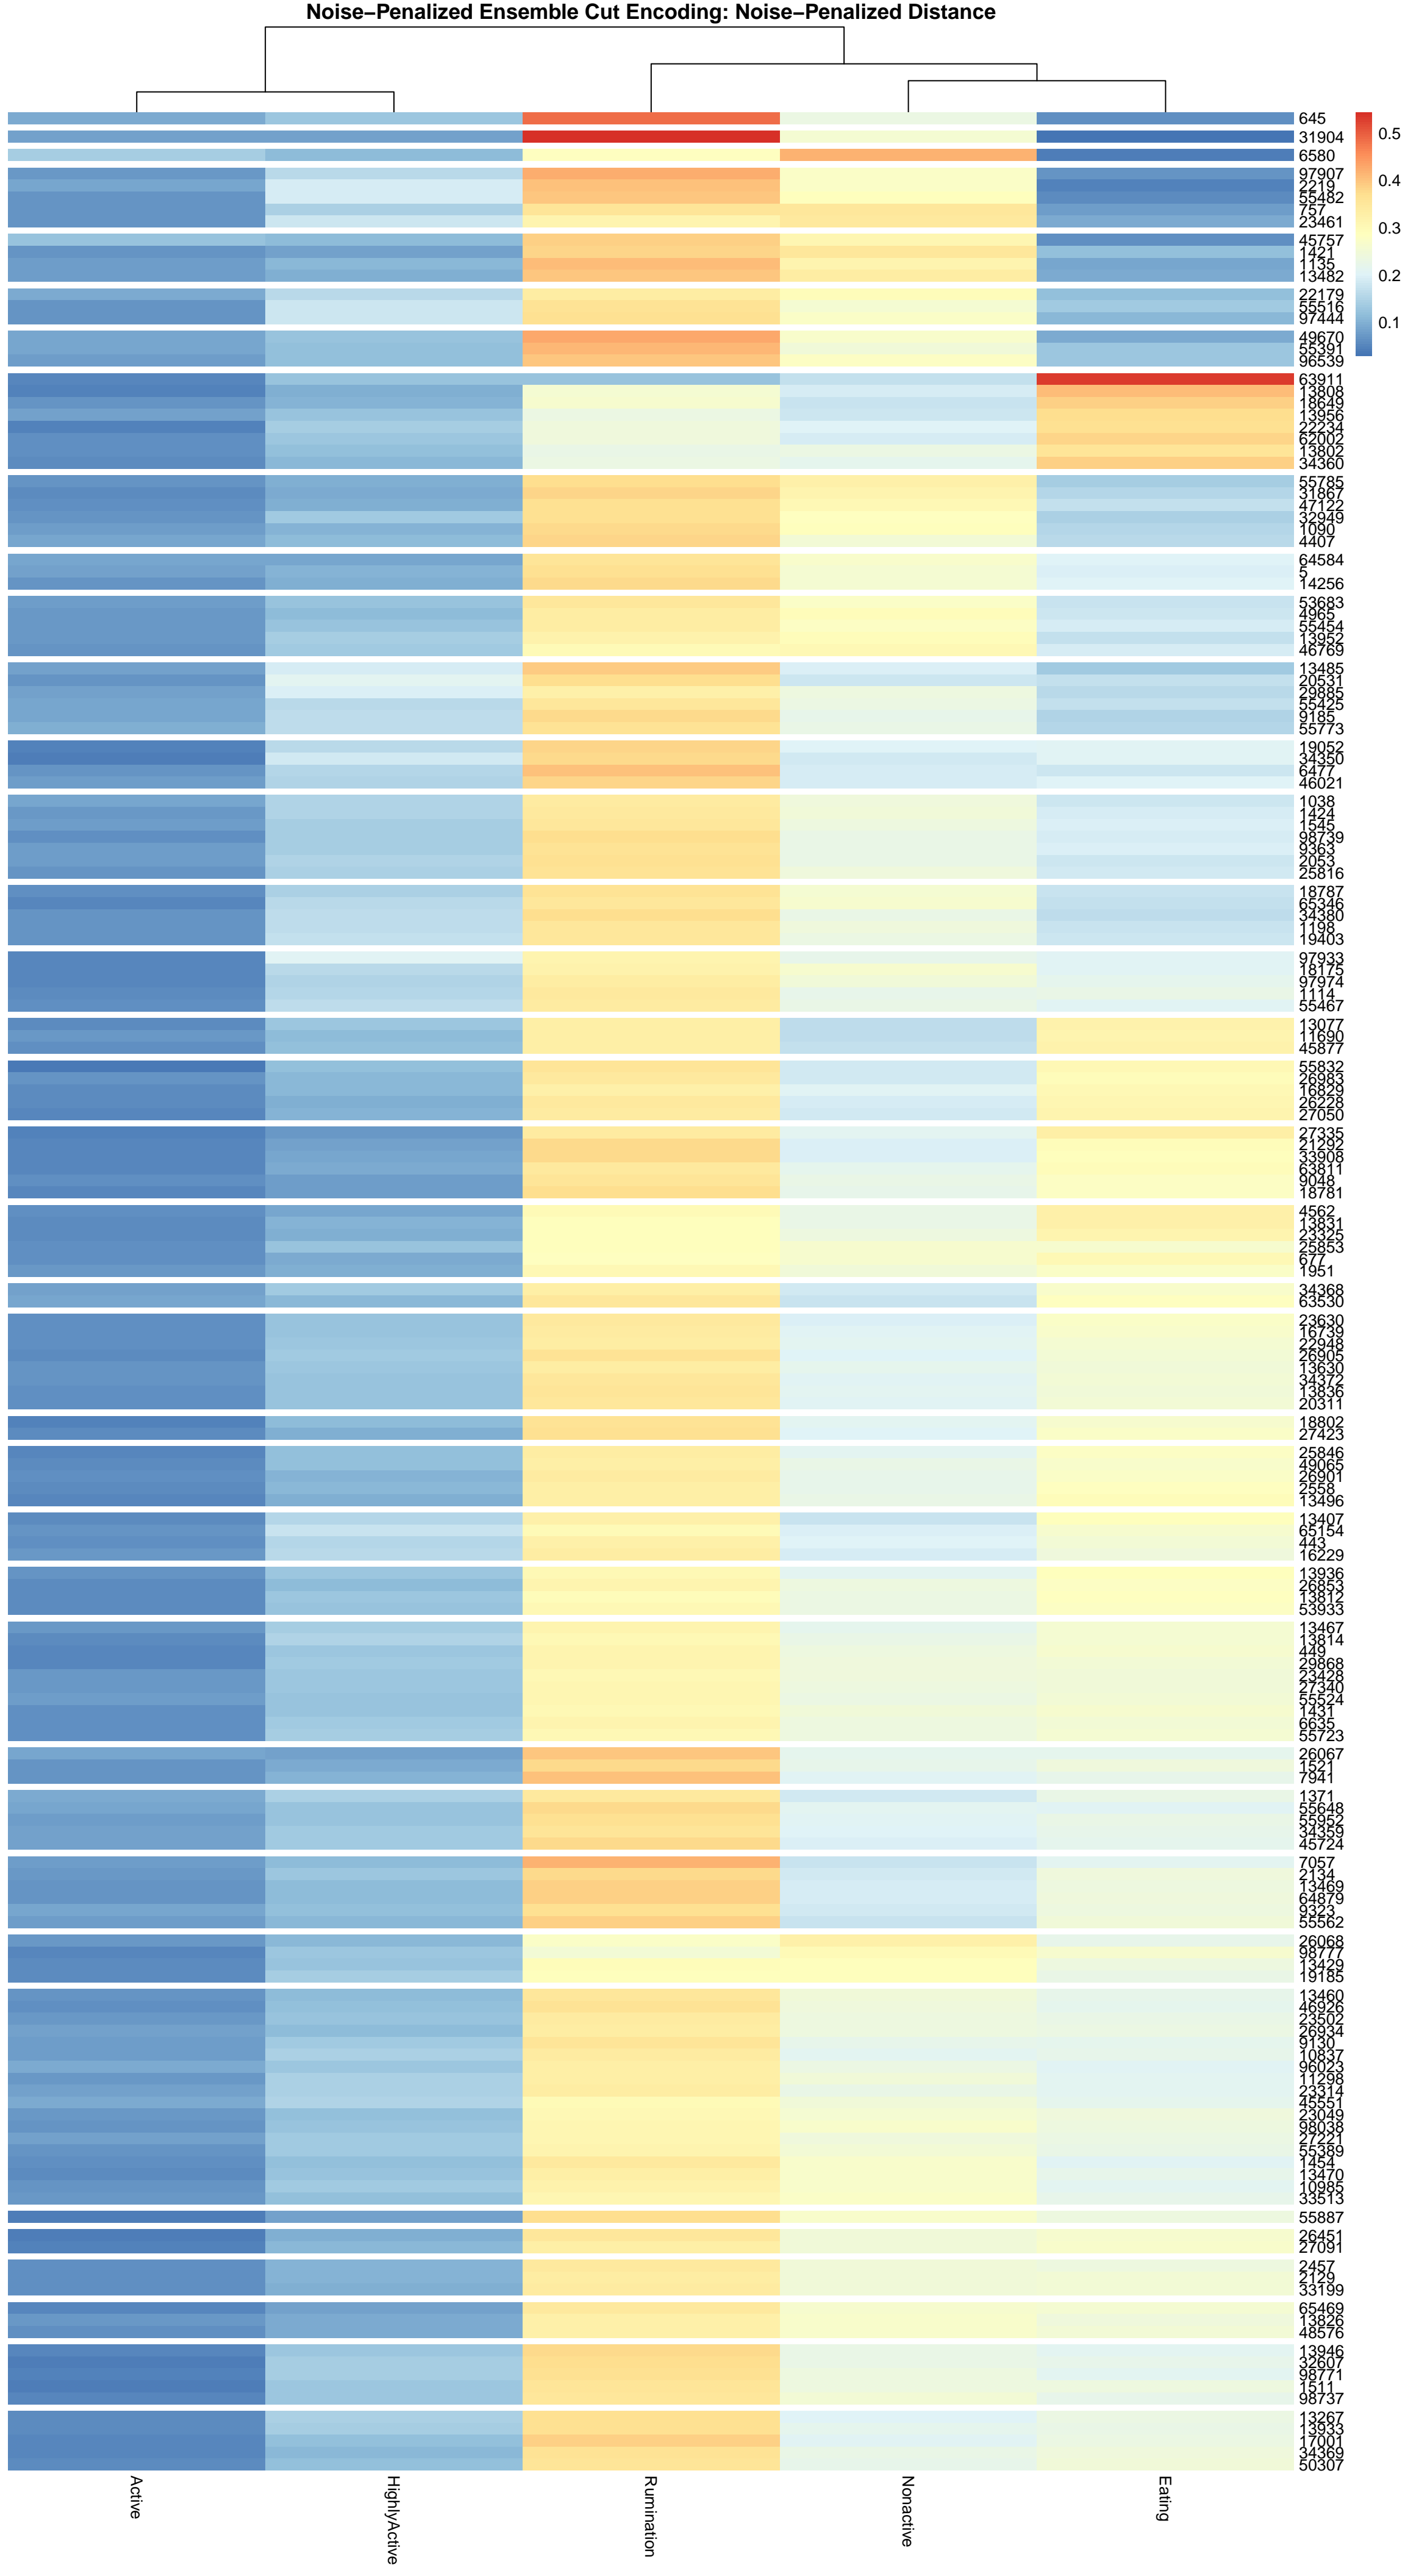

Supplement: s1 [file s1]

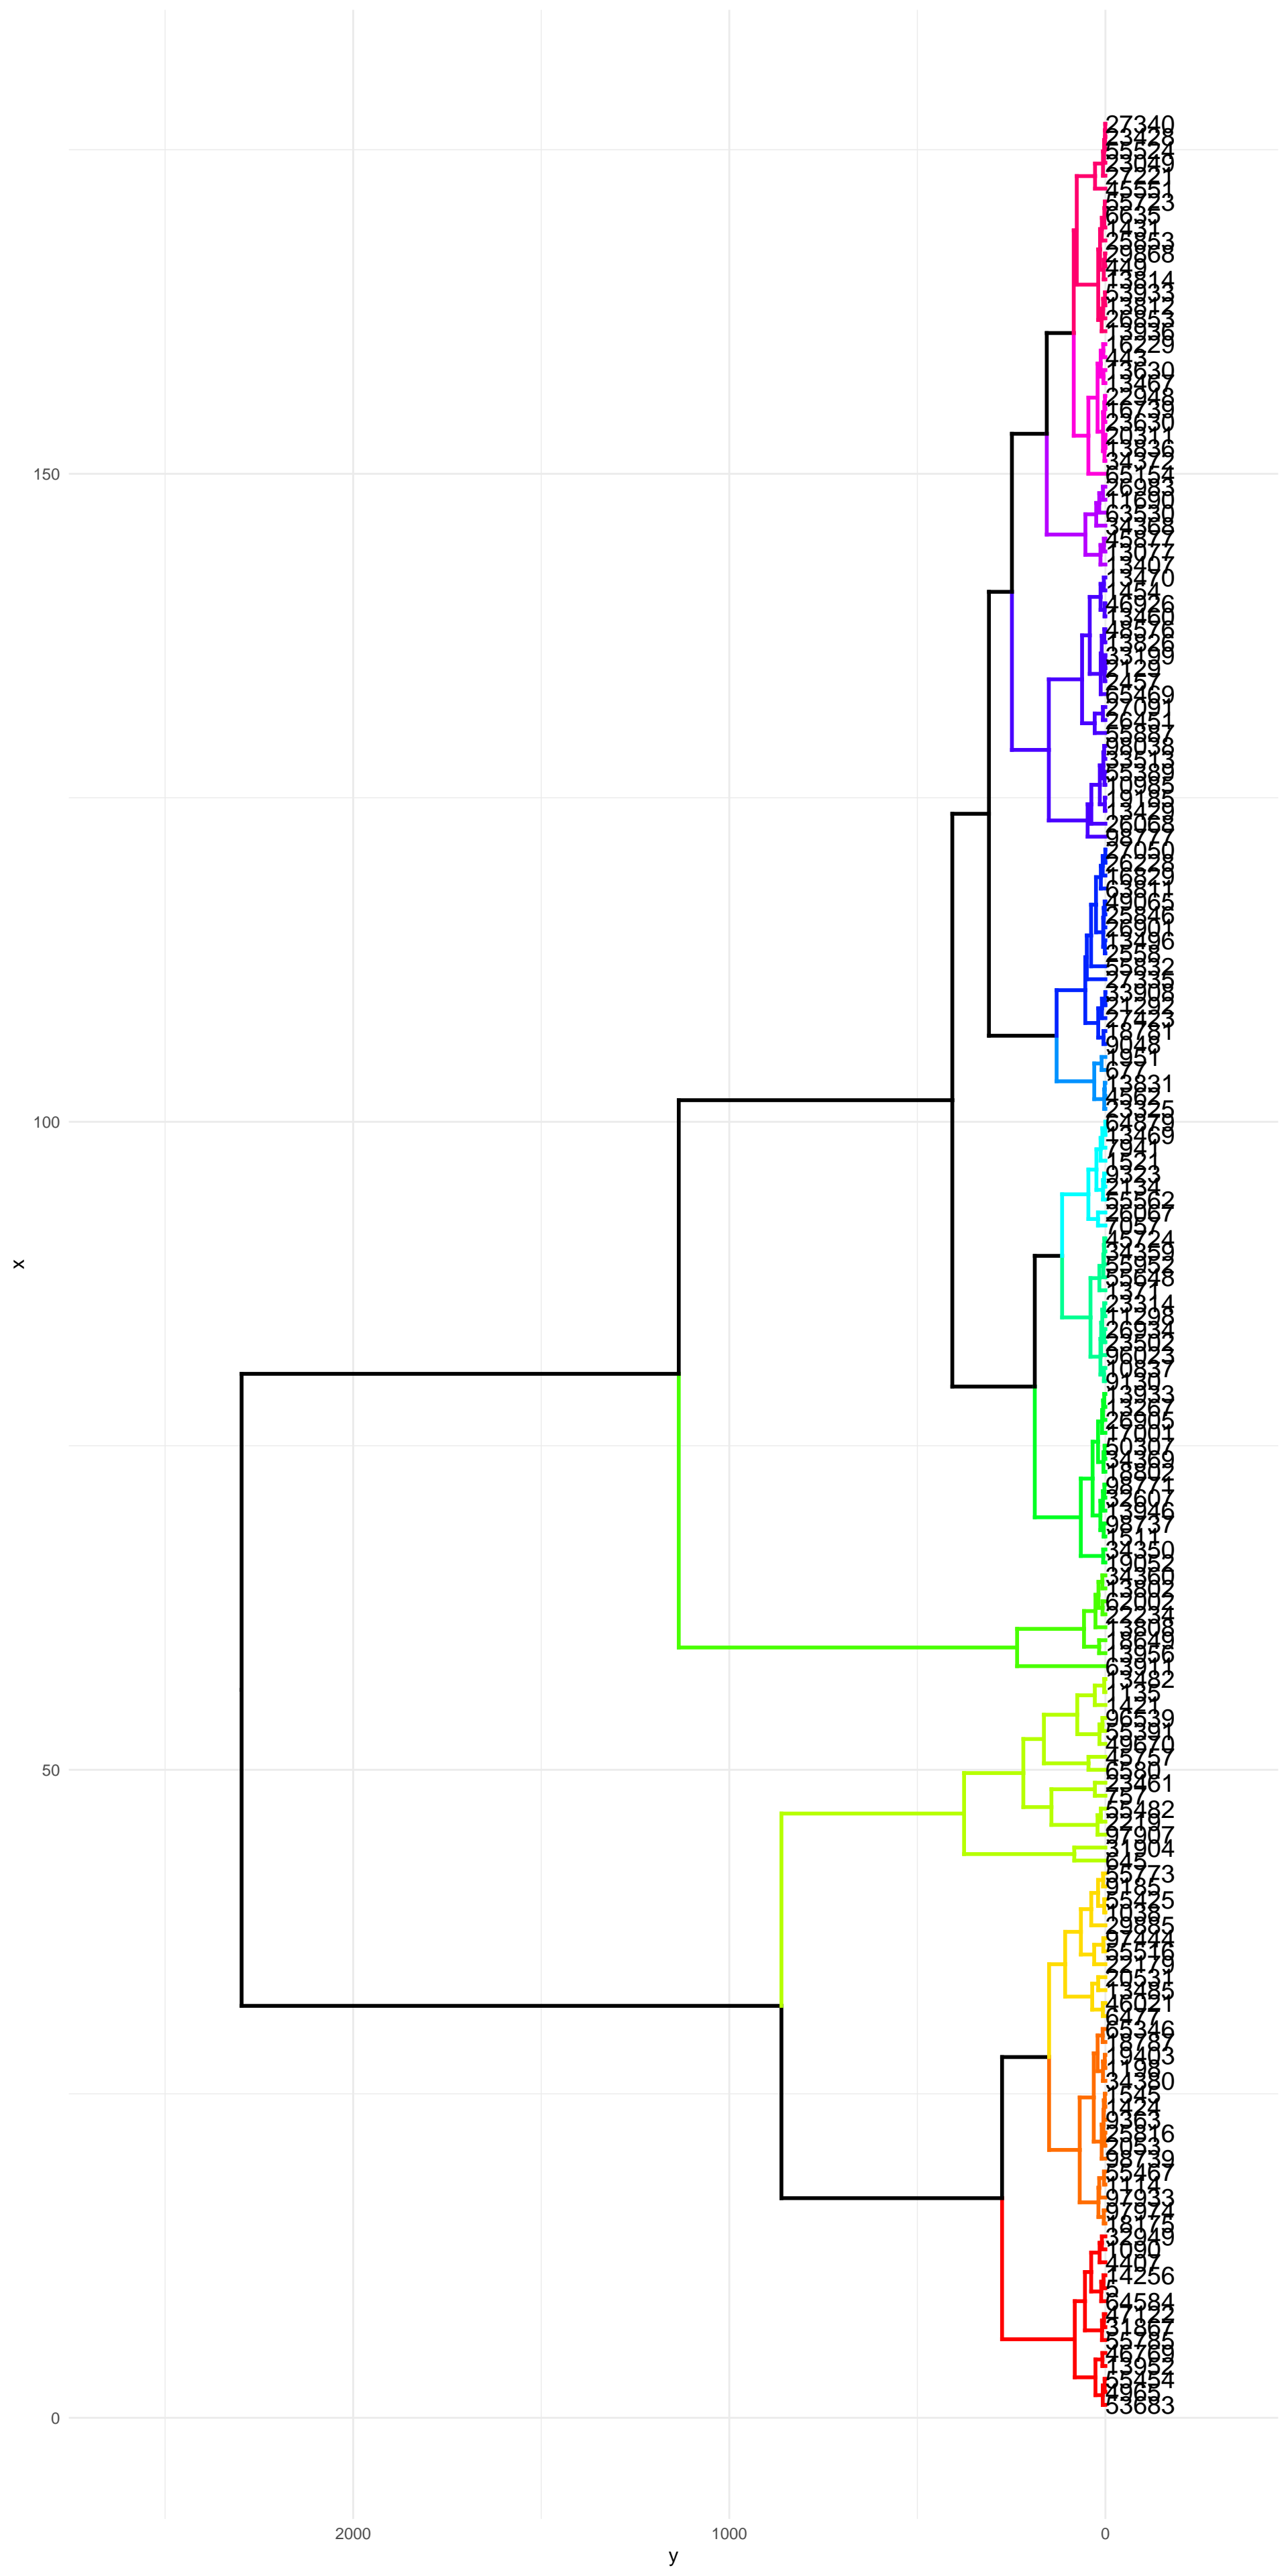

Supplement: s1 [file s1]

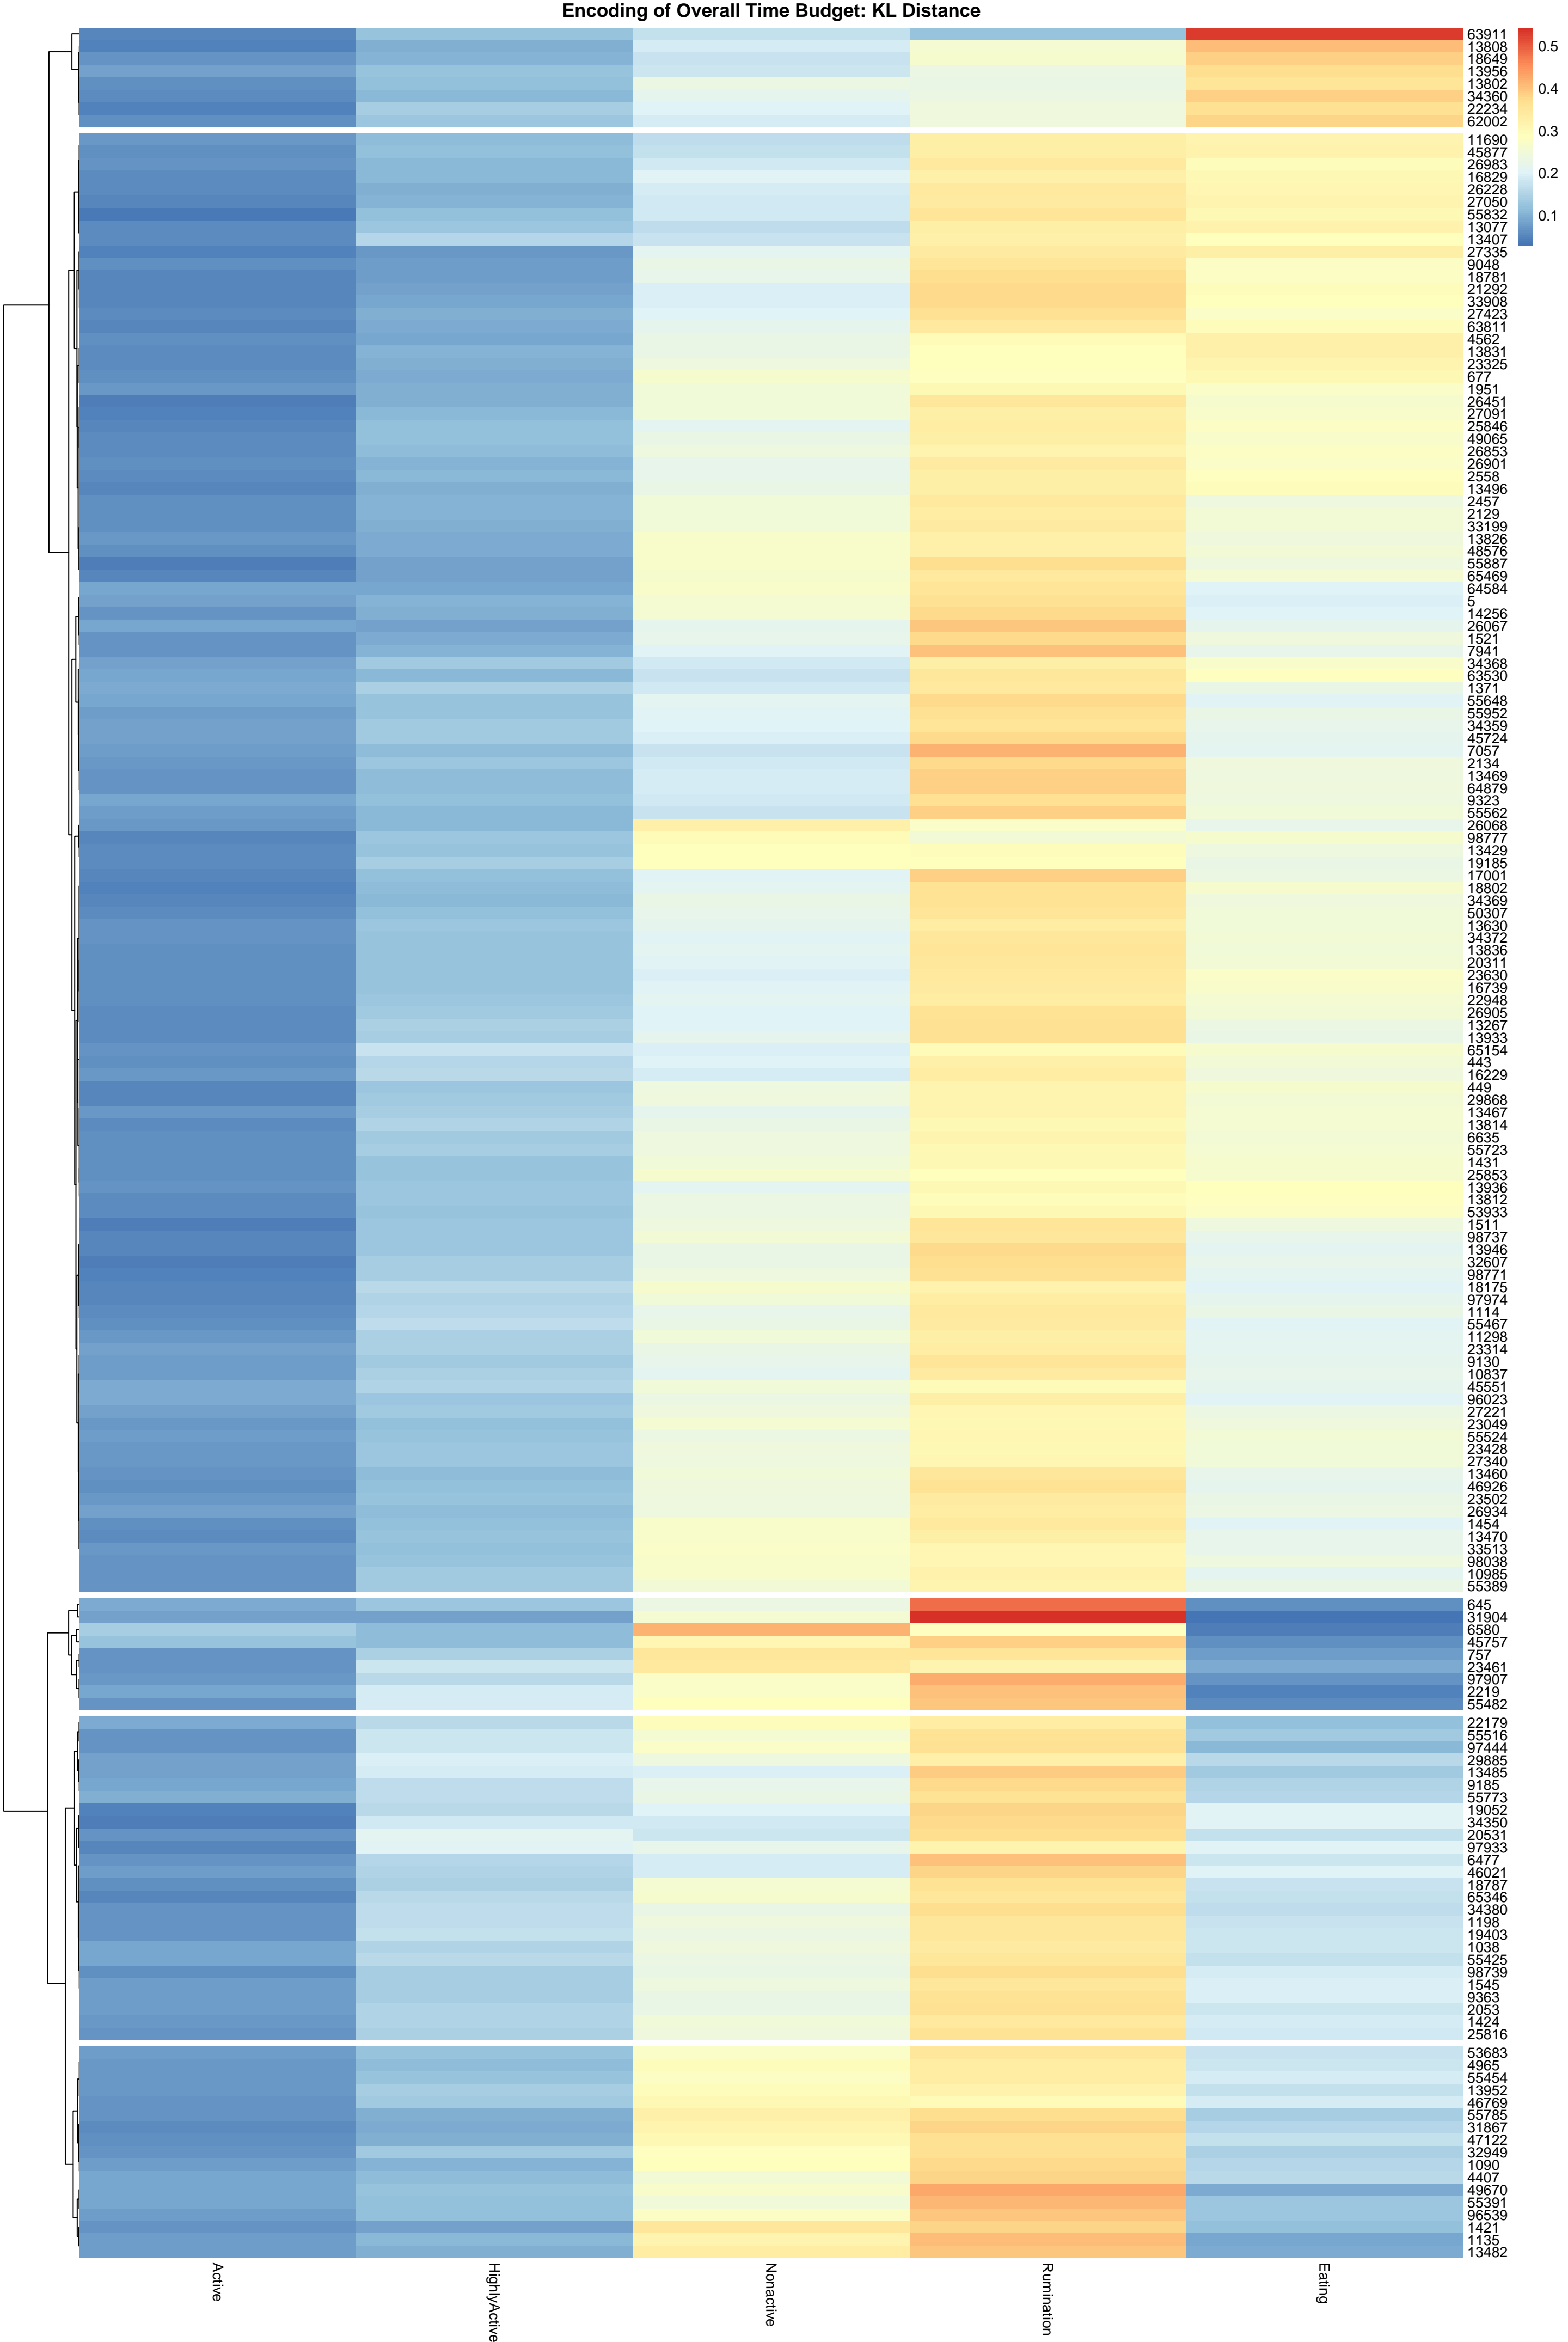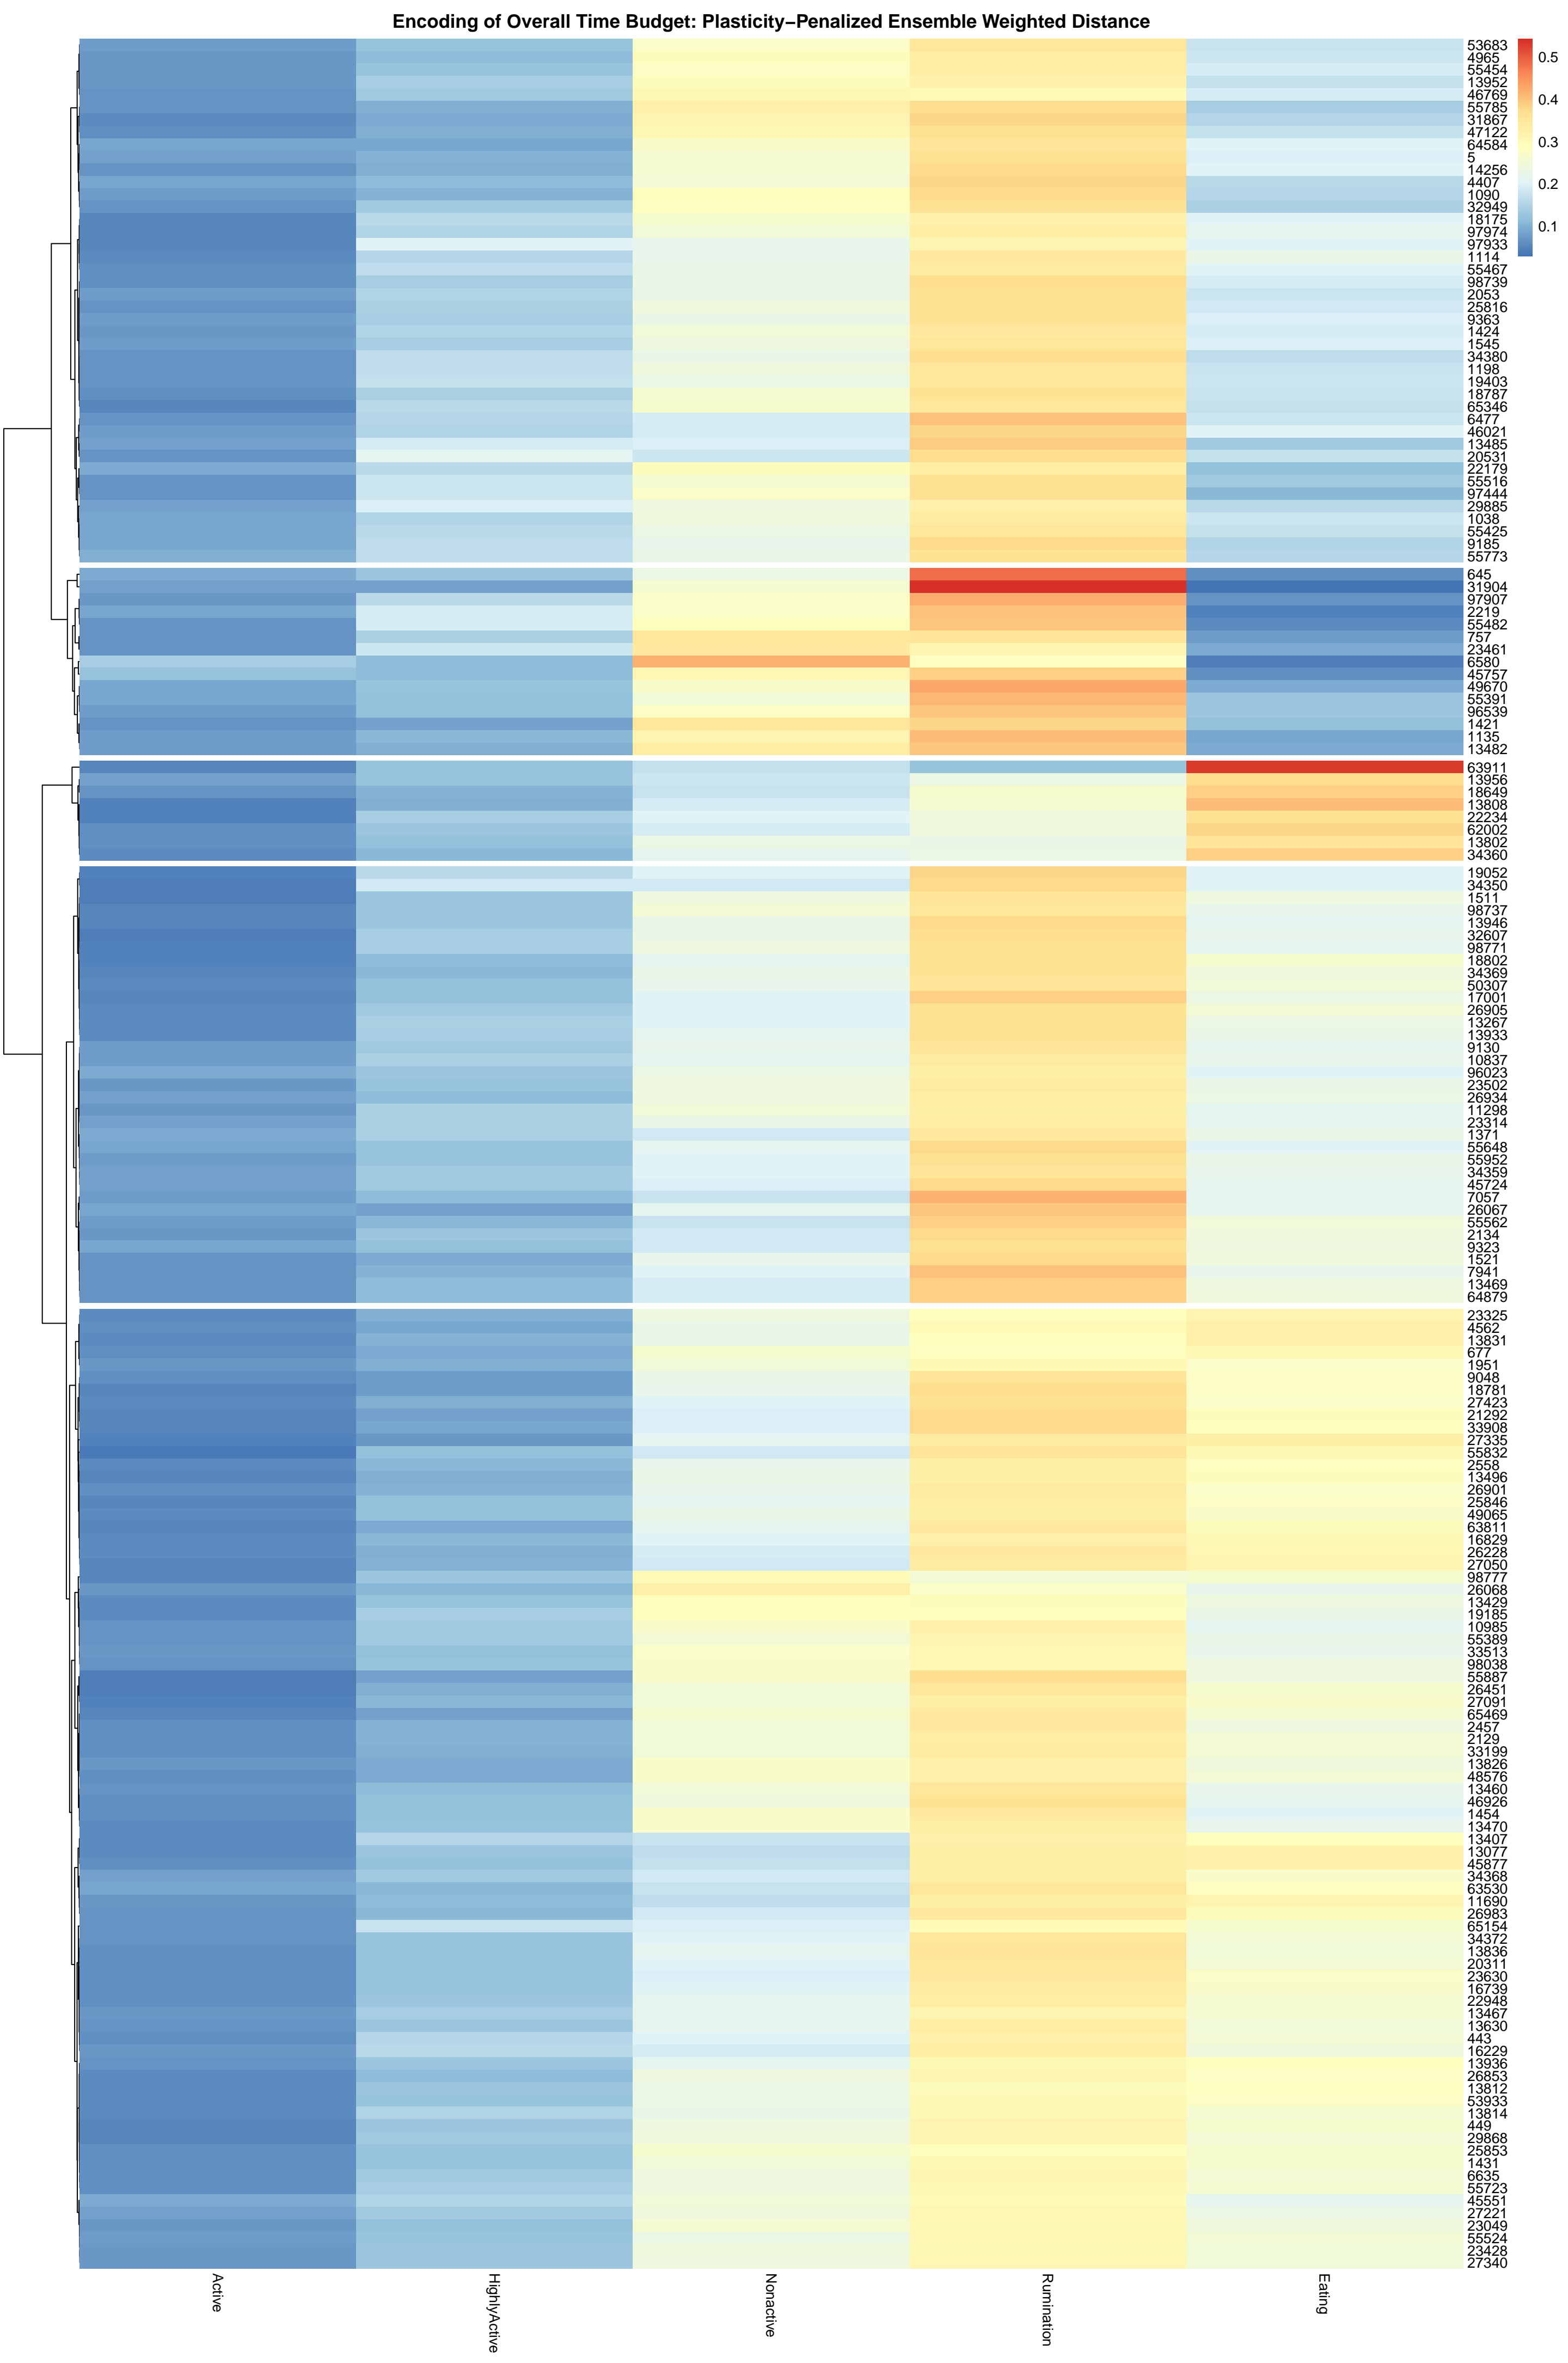

|   |   |    |   |    |    |
|---|---|----|---|----|----|
| 1 | 0 | 7  | 0 | 24 | 11 |
| 2 | 0 | 0  | 9 | 0  | 6  |
| 3 | 8 | 0  | 0 | 0  | 0  |
| 4 | 0 | 33 | 0 | 2  | 0  |
| 5 | 0 | 77 | 0 | 0  | 0  |
|   | 1 | 2  | 3 | 4  | 5  |

Supplement: s1 [file s1]

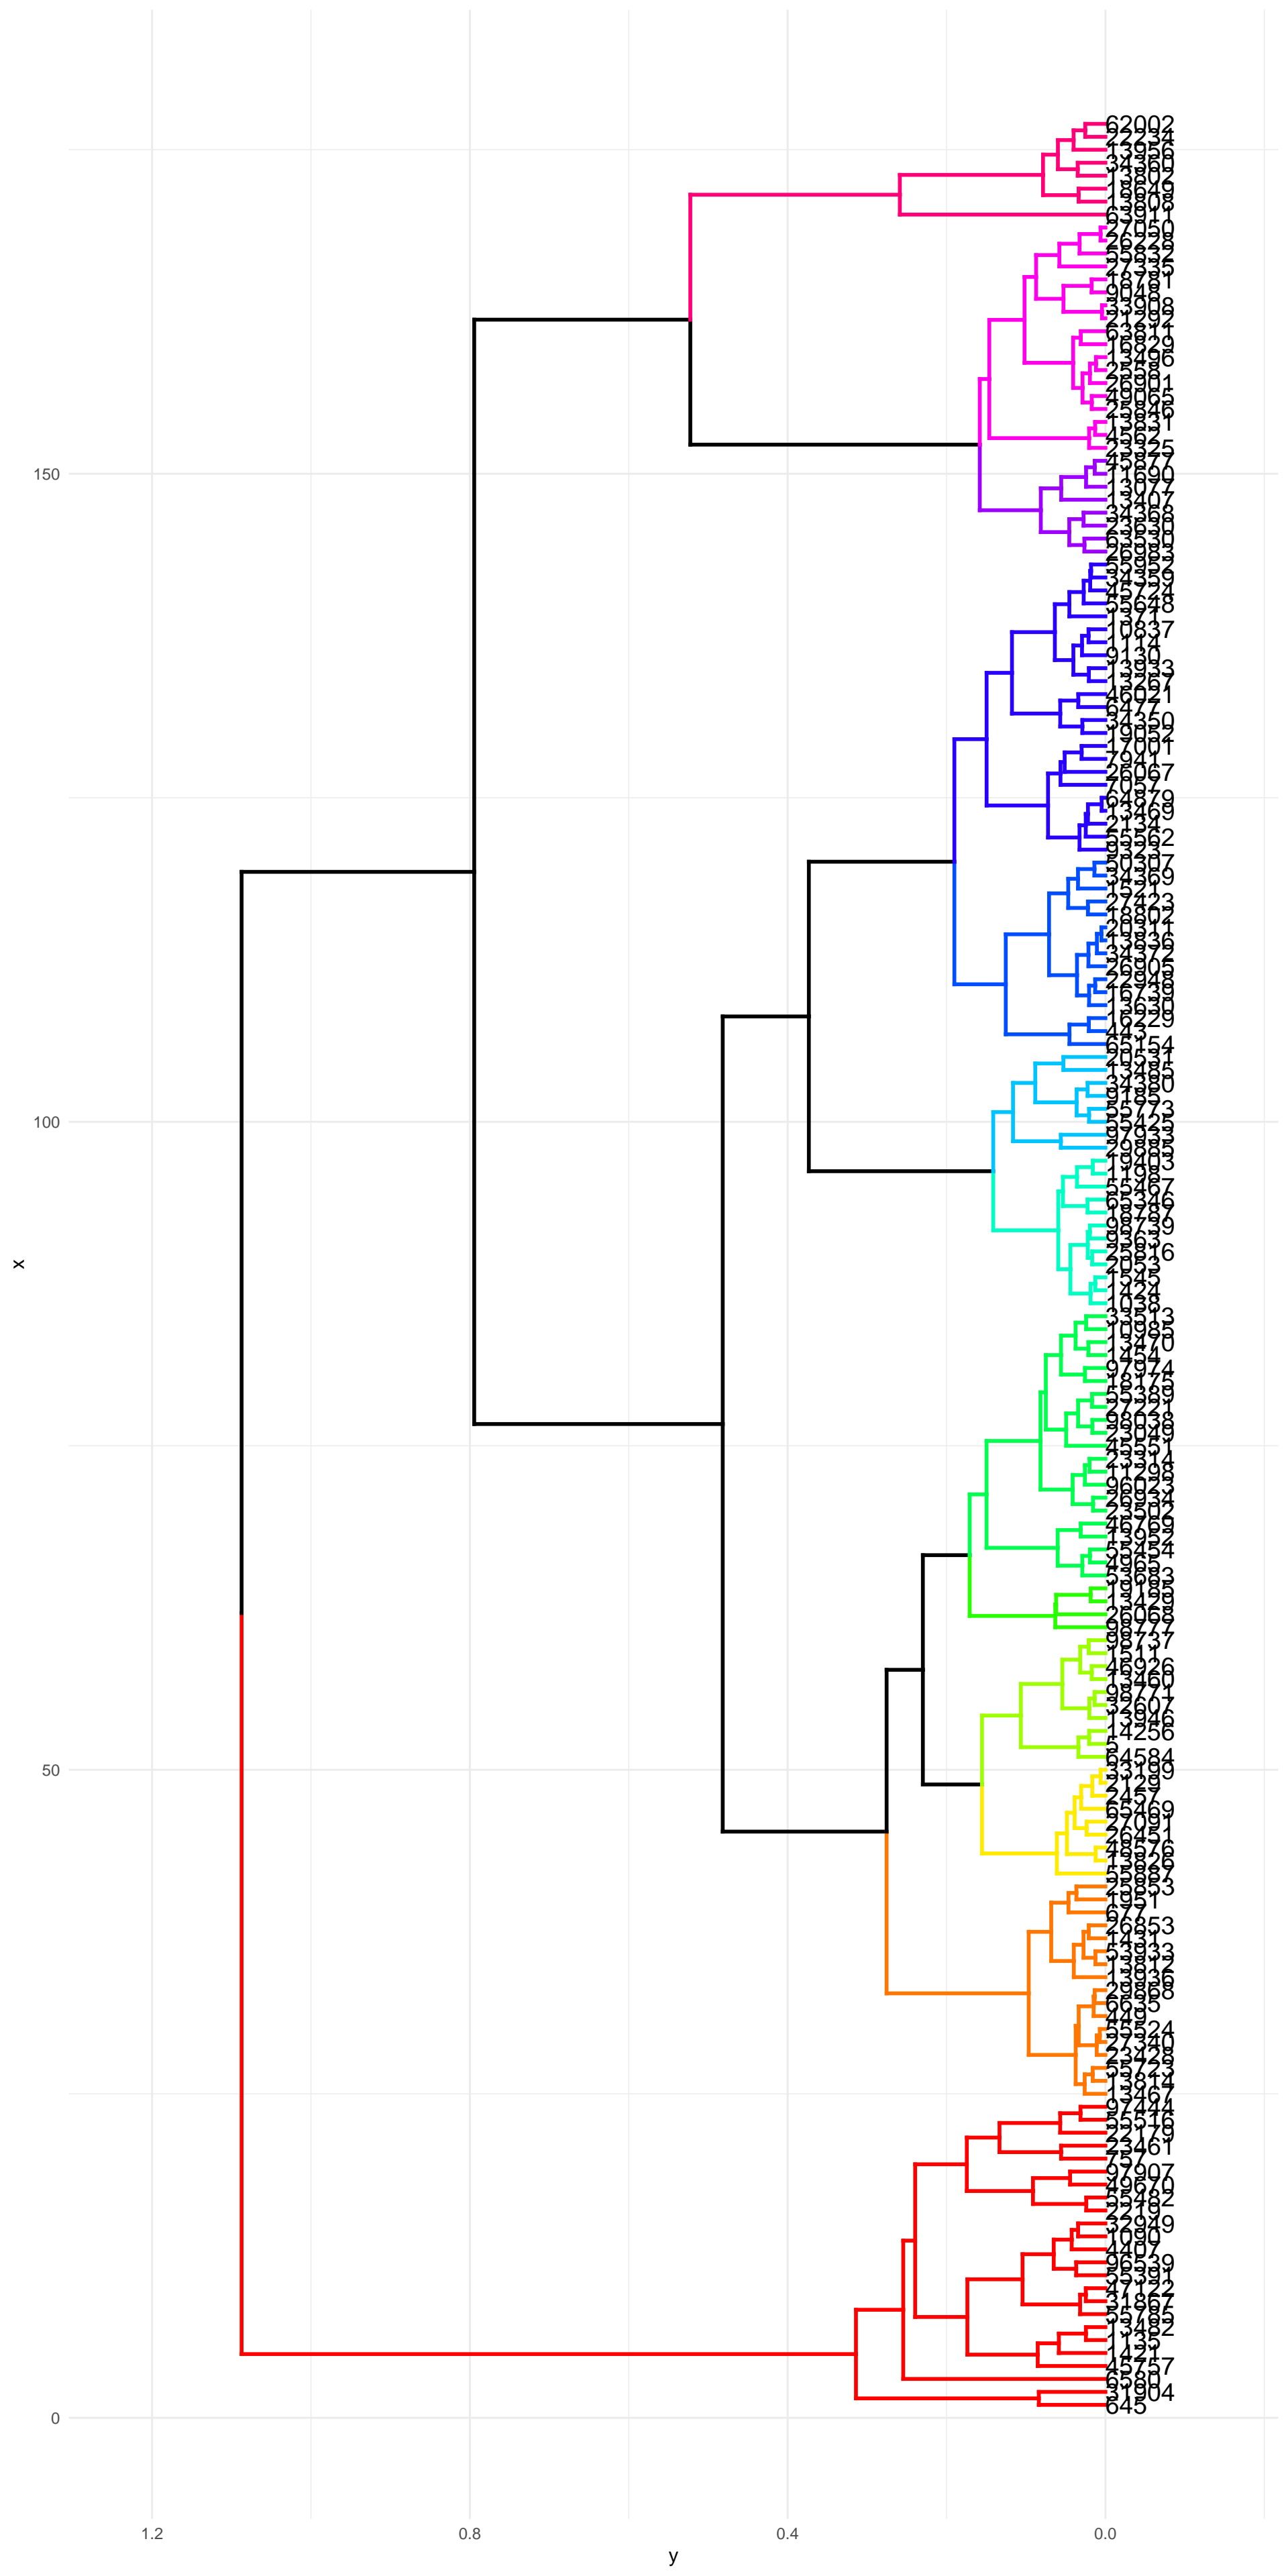

Supplement: s1 [file s1]

Noise-Penalized Ensemble Cut Encoding: KL Distance

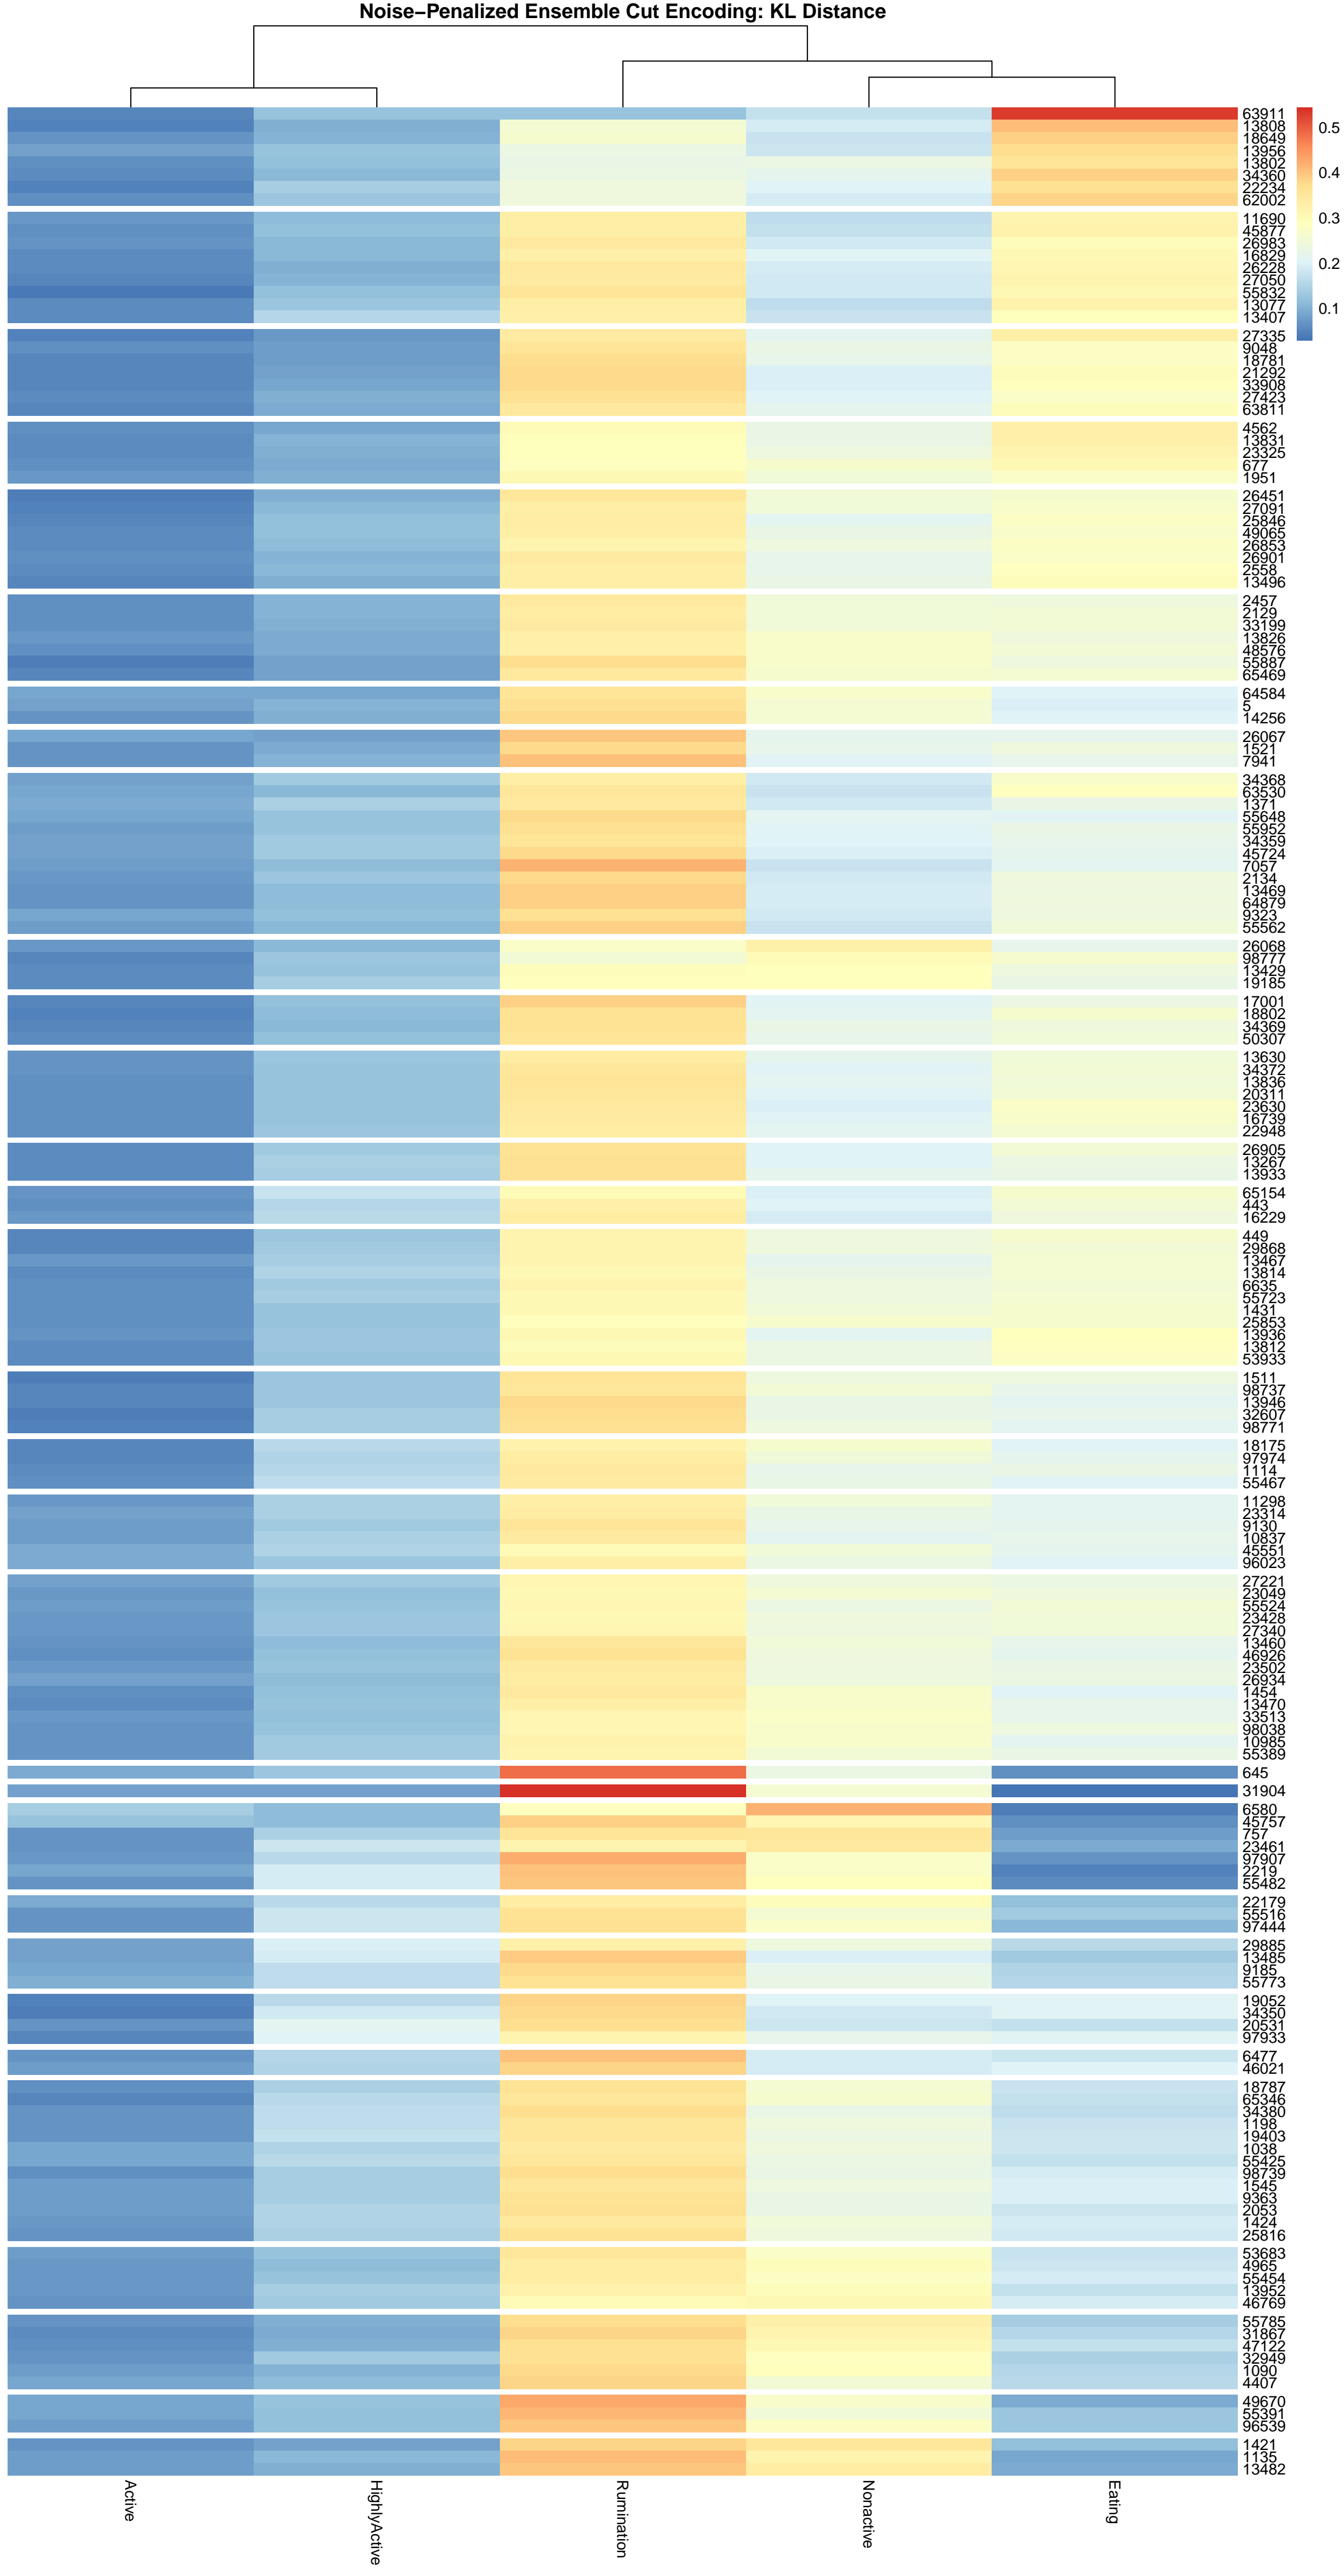

Supplement: s1 [file s1]

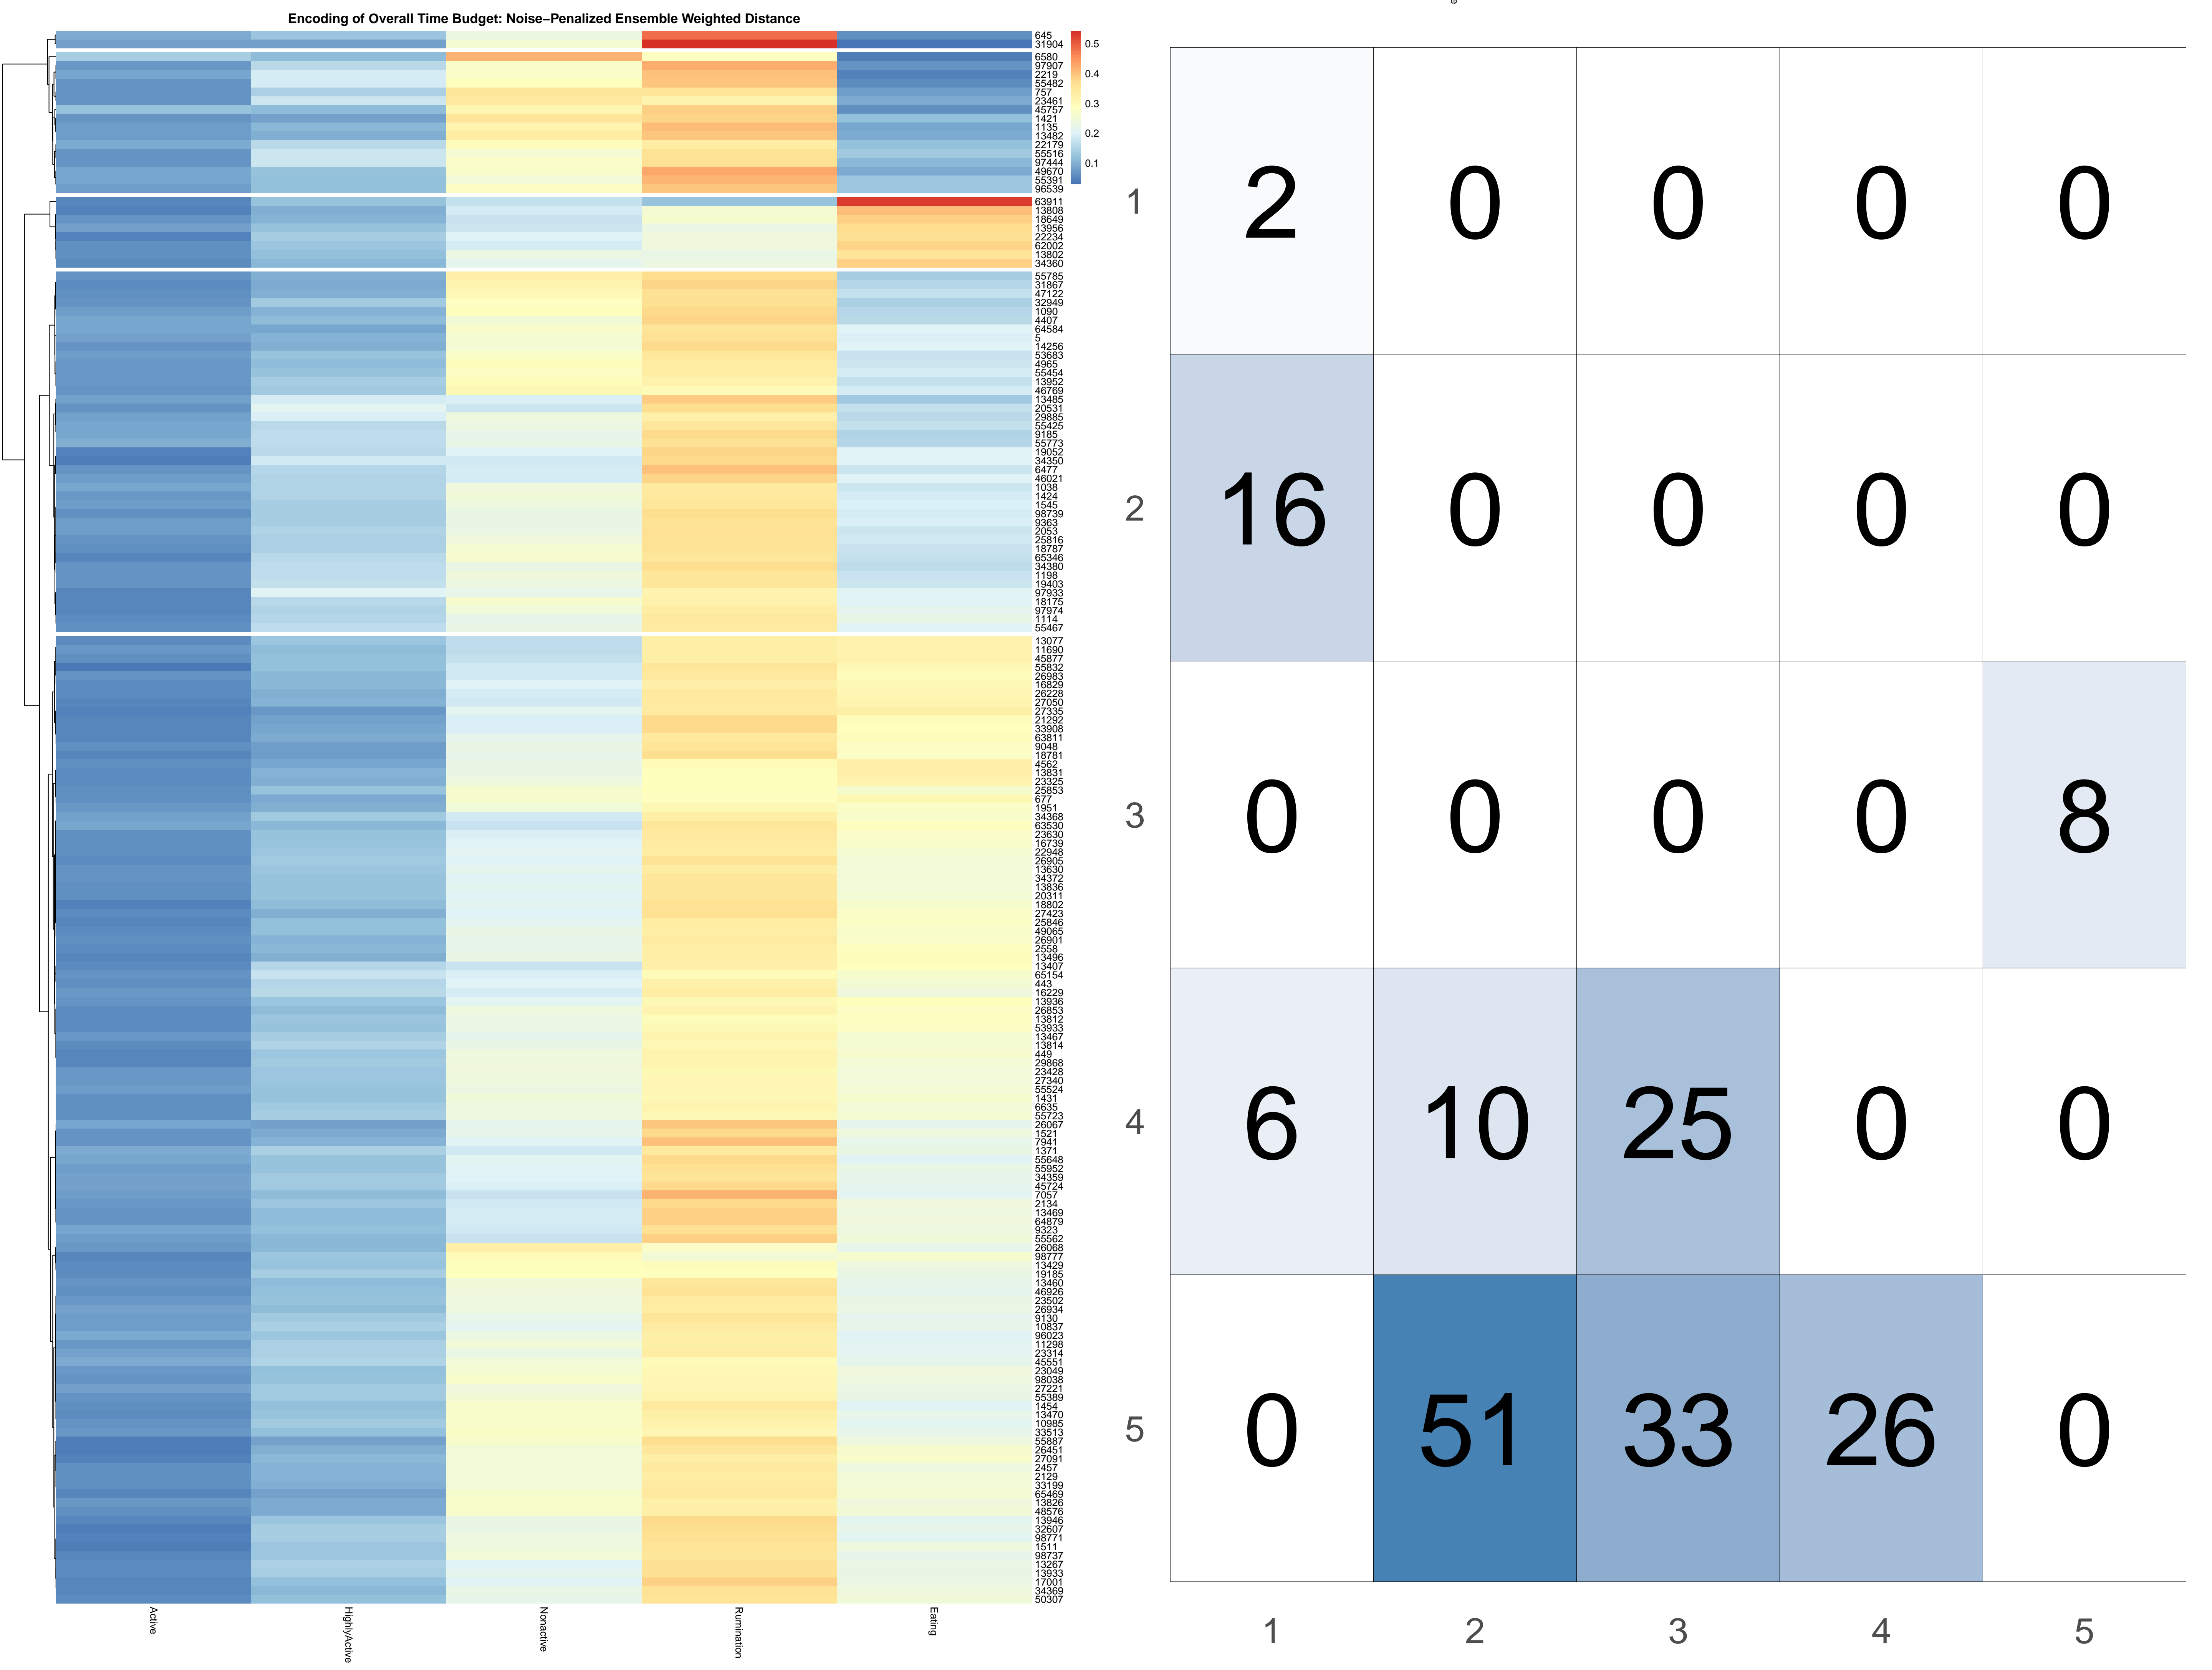

|   |    |    |    |    |   |
|---|----|----|----|----|---|
|   | 1  | 2  | 3  | 4  | 5 |
| 1 | 2  | 0  | 0  | 0  | 0 |
| 2 | 16 | 0  | 0  | 0  | 0 |
| 3 | 0  | 0  | 0  | 0  | 8 |
| 4 | 6  | 10 | 25 | 0  | 0 |
| 5 | 0  | 51 | 33 | 26 | 0 |

Supplement: s1 [file s1]

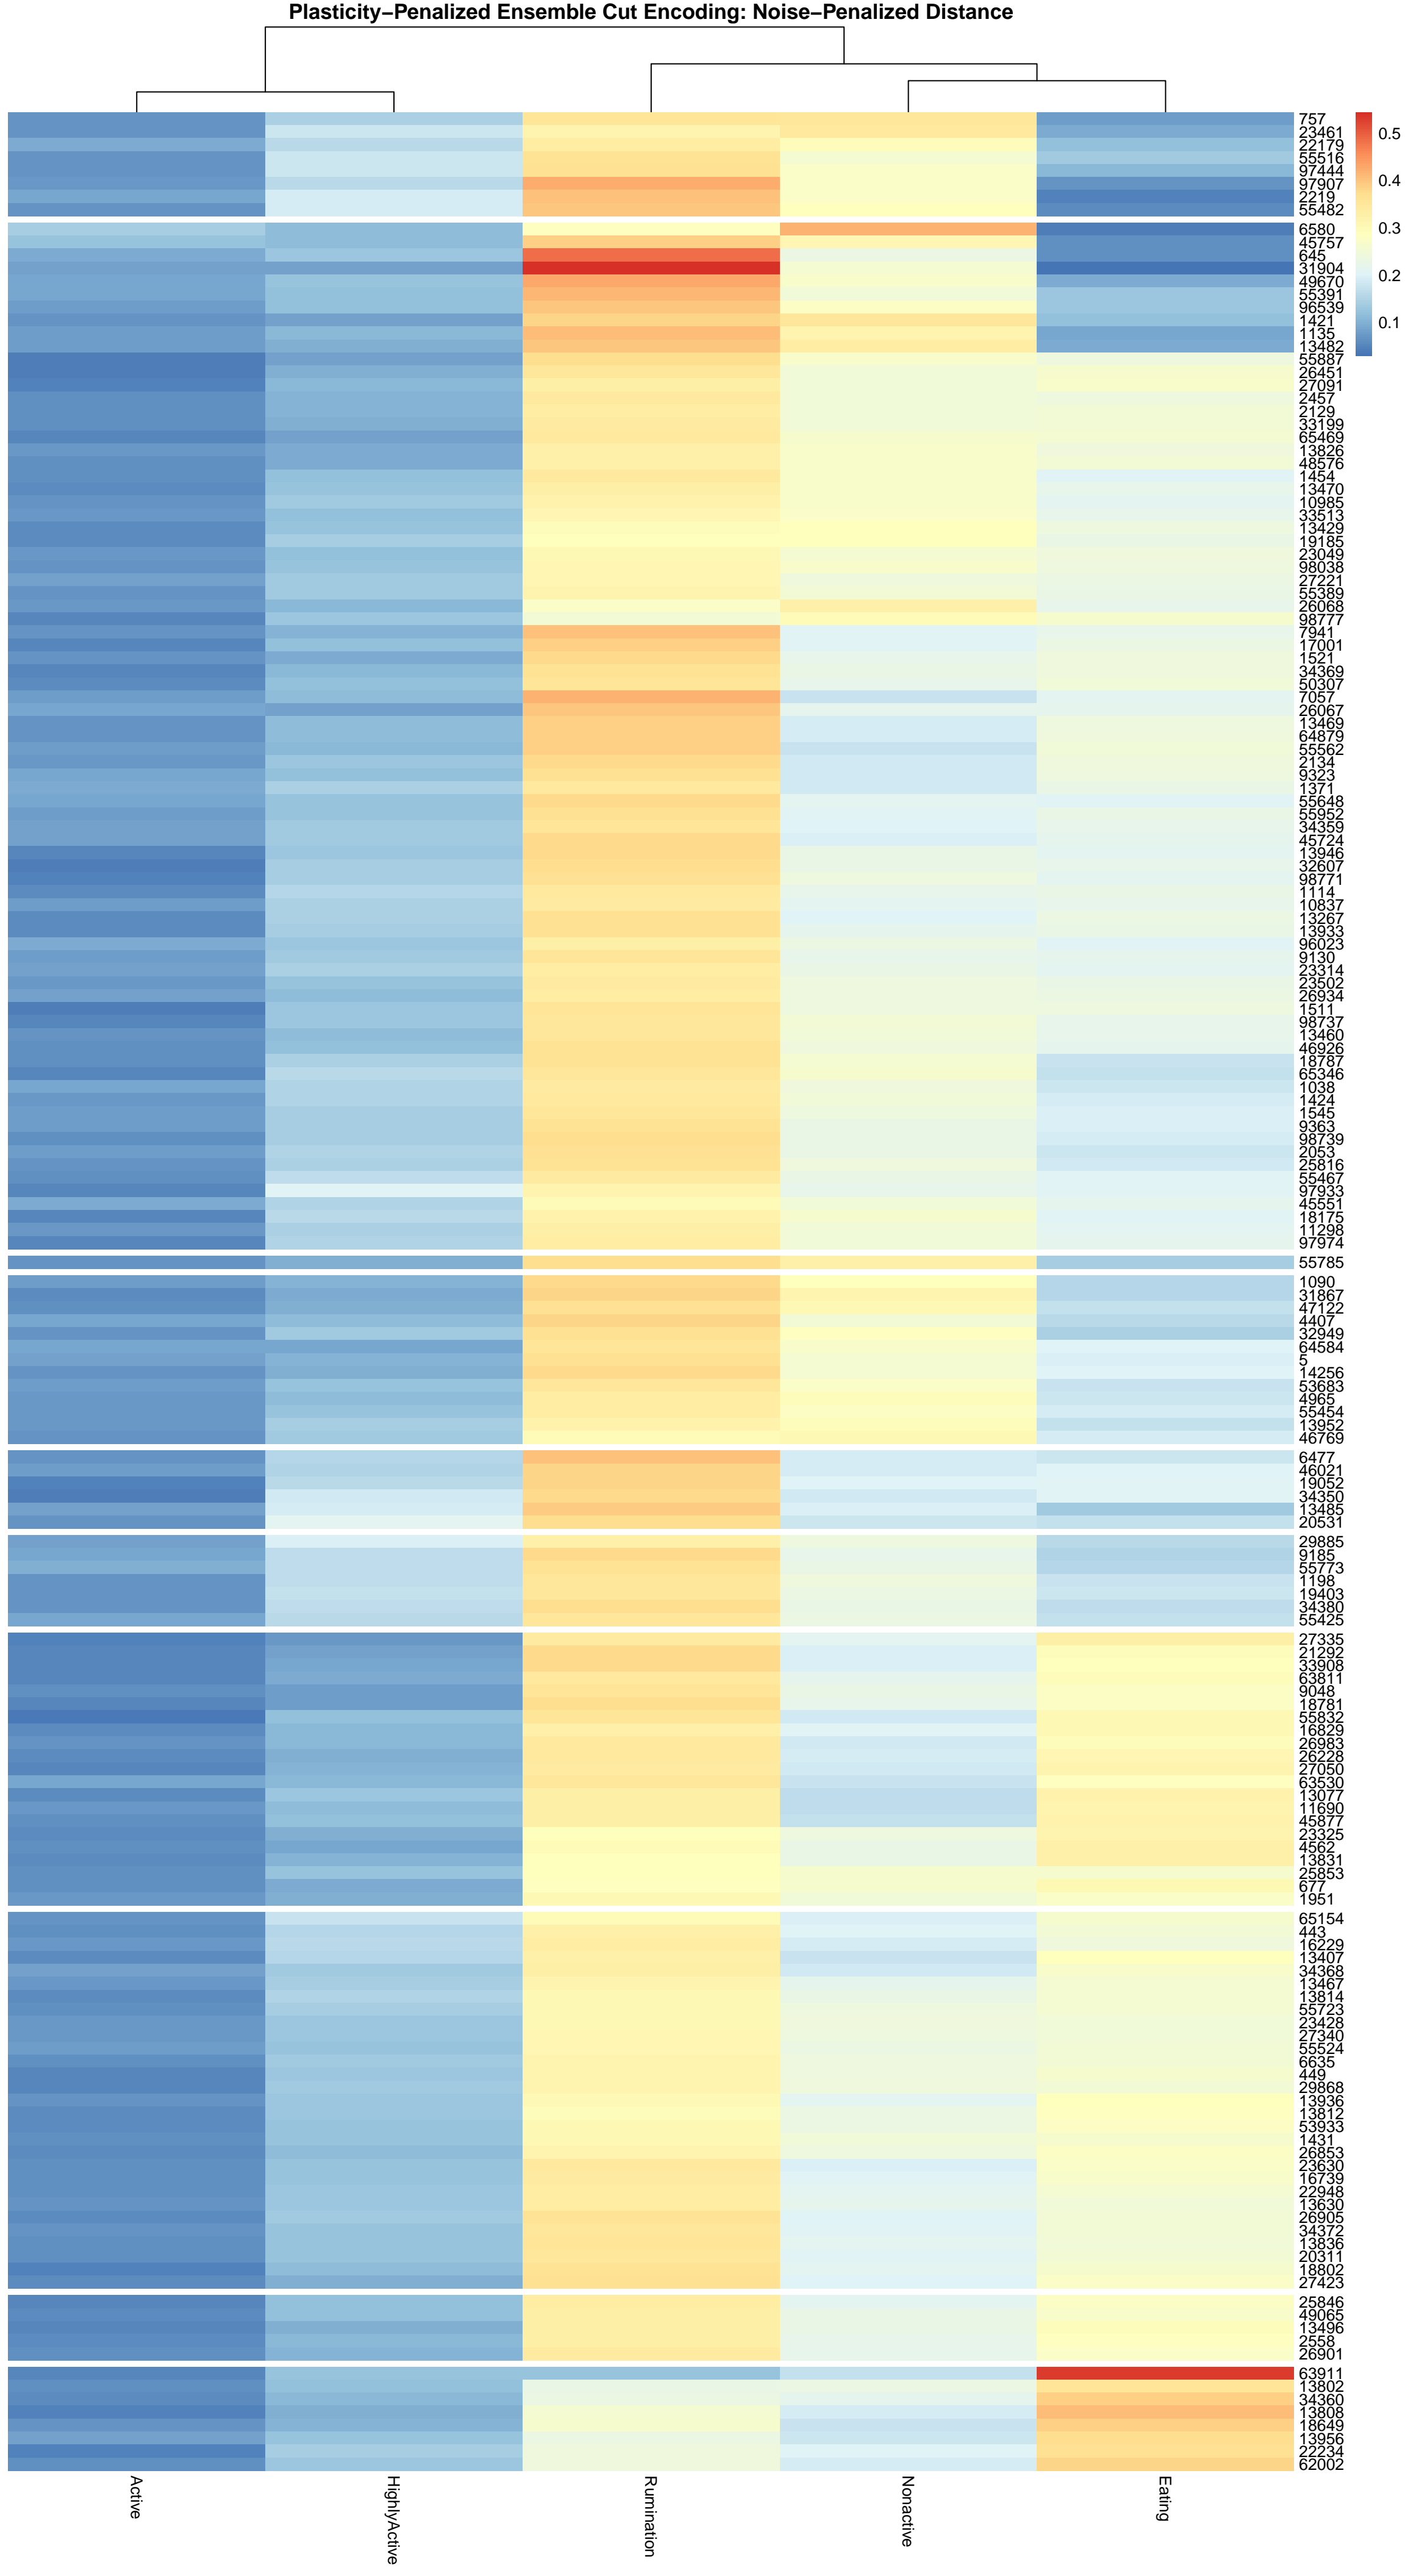

Supplement: s1 [file s1]

Plasticity-Penalized Ensemble Cut Encoding: Plasticity-Penalized Distance

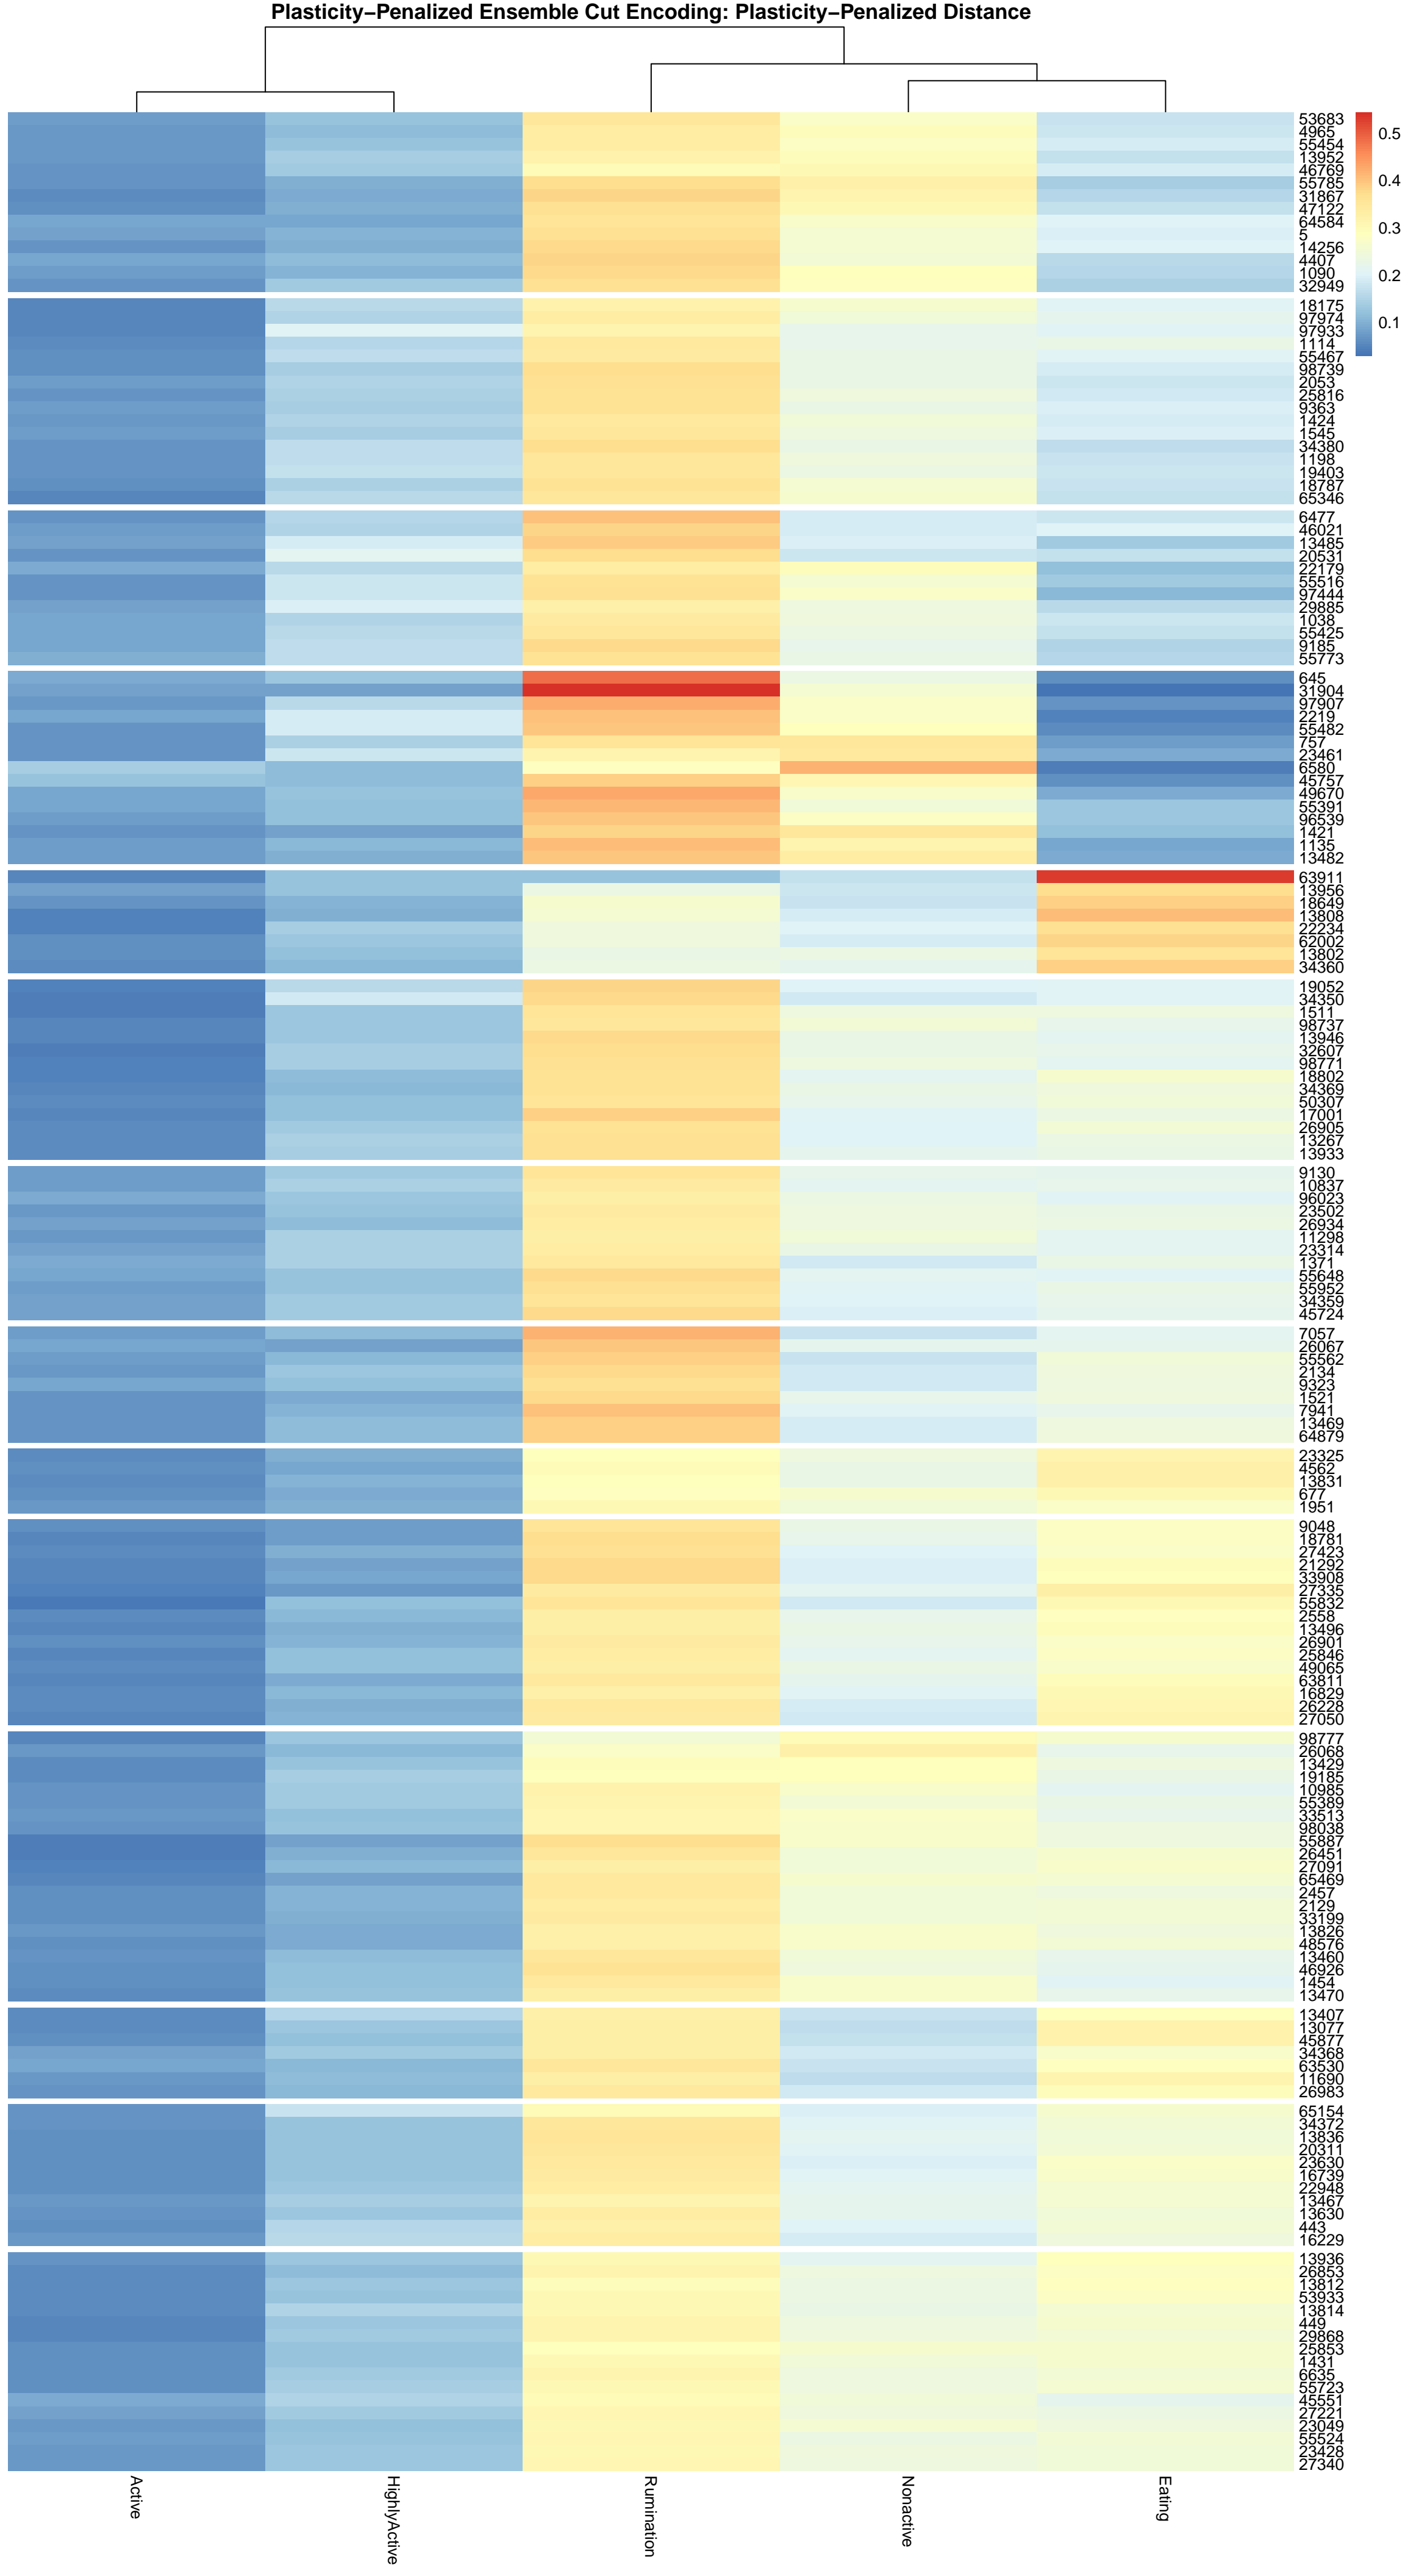

Supplement: s1 [file s1]

Plasticity-Penalized Ensemble Cut Encoding: KL Distance

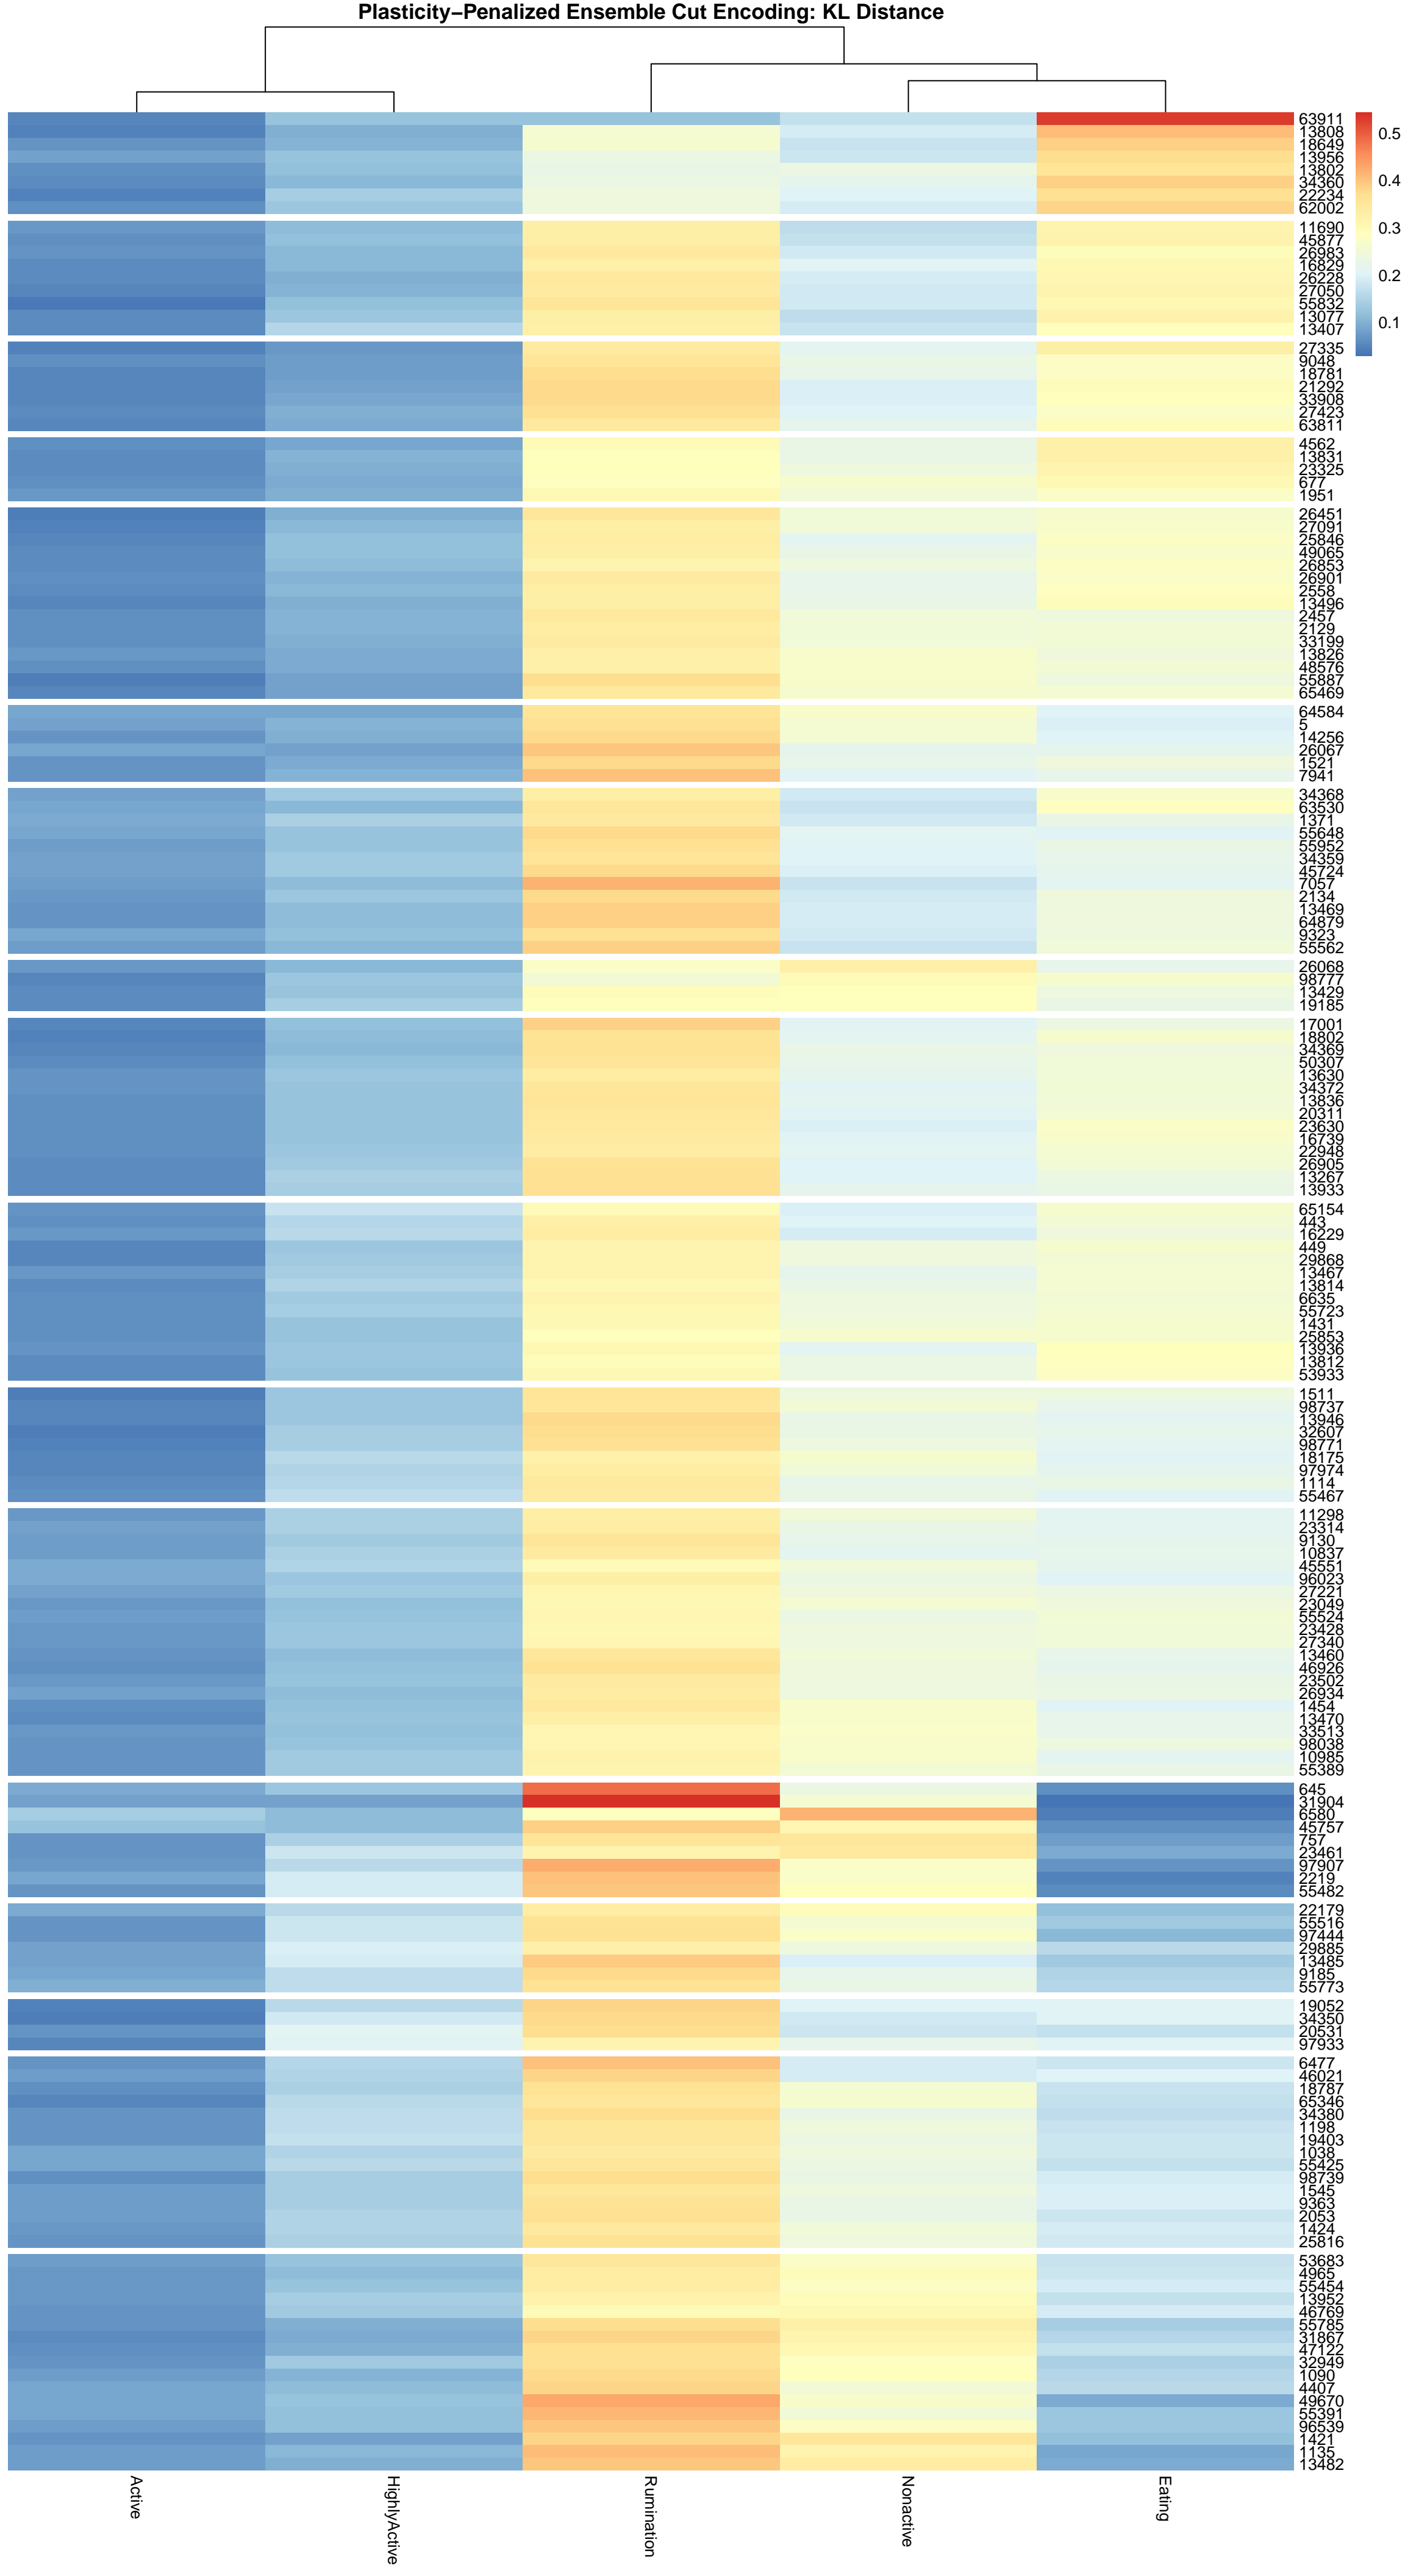

Supplement: s1 [file s1]

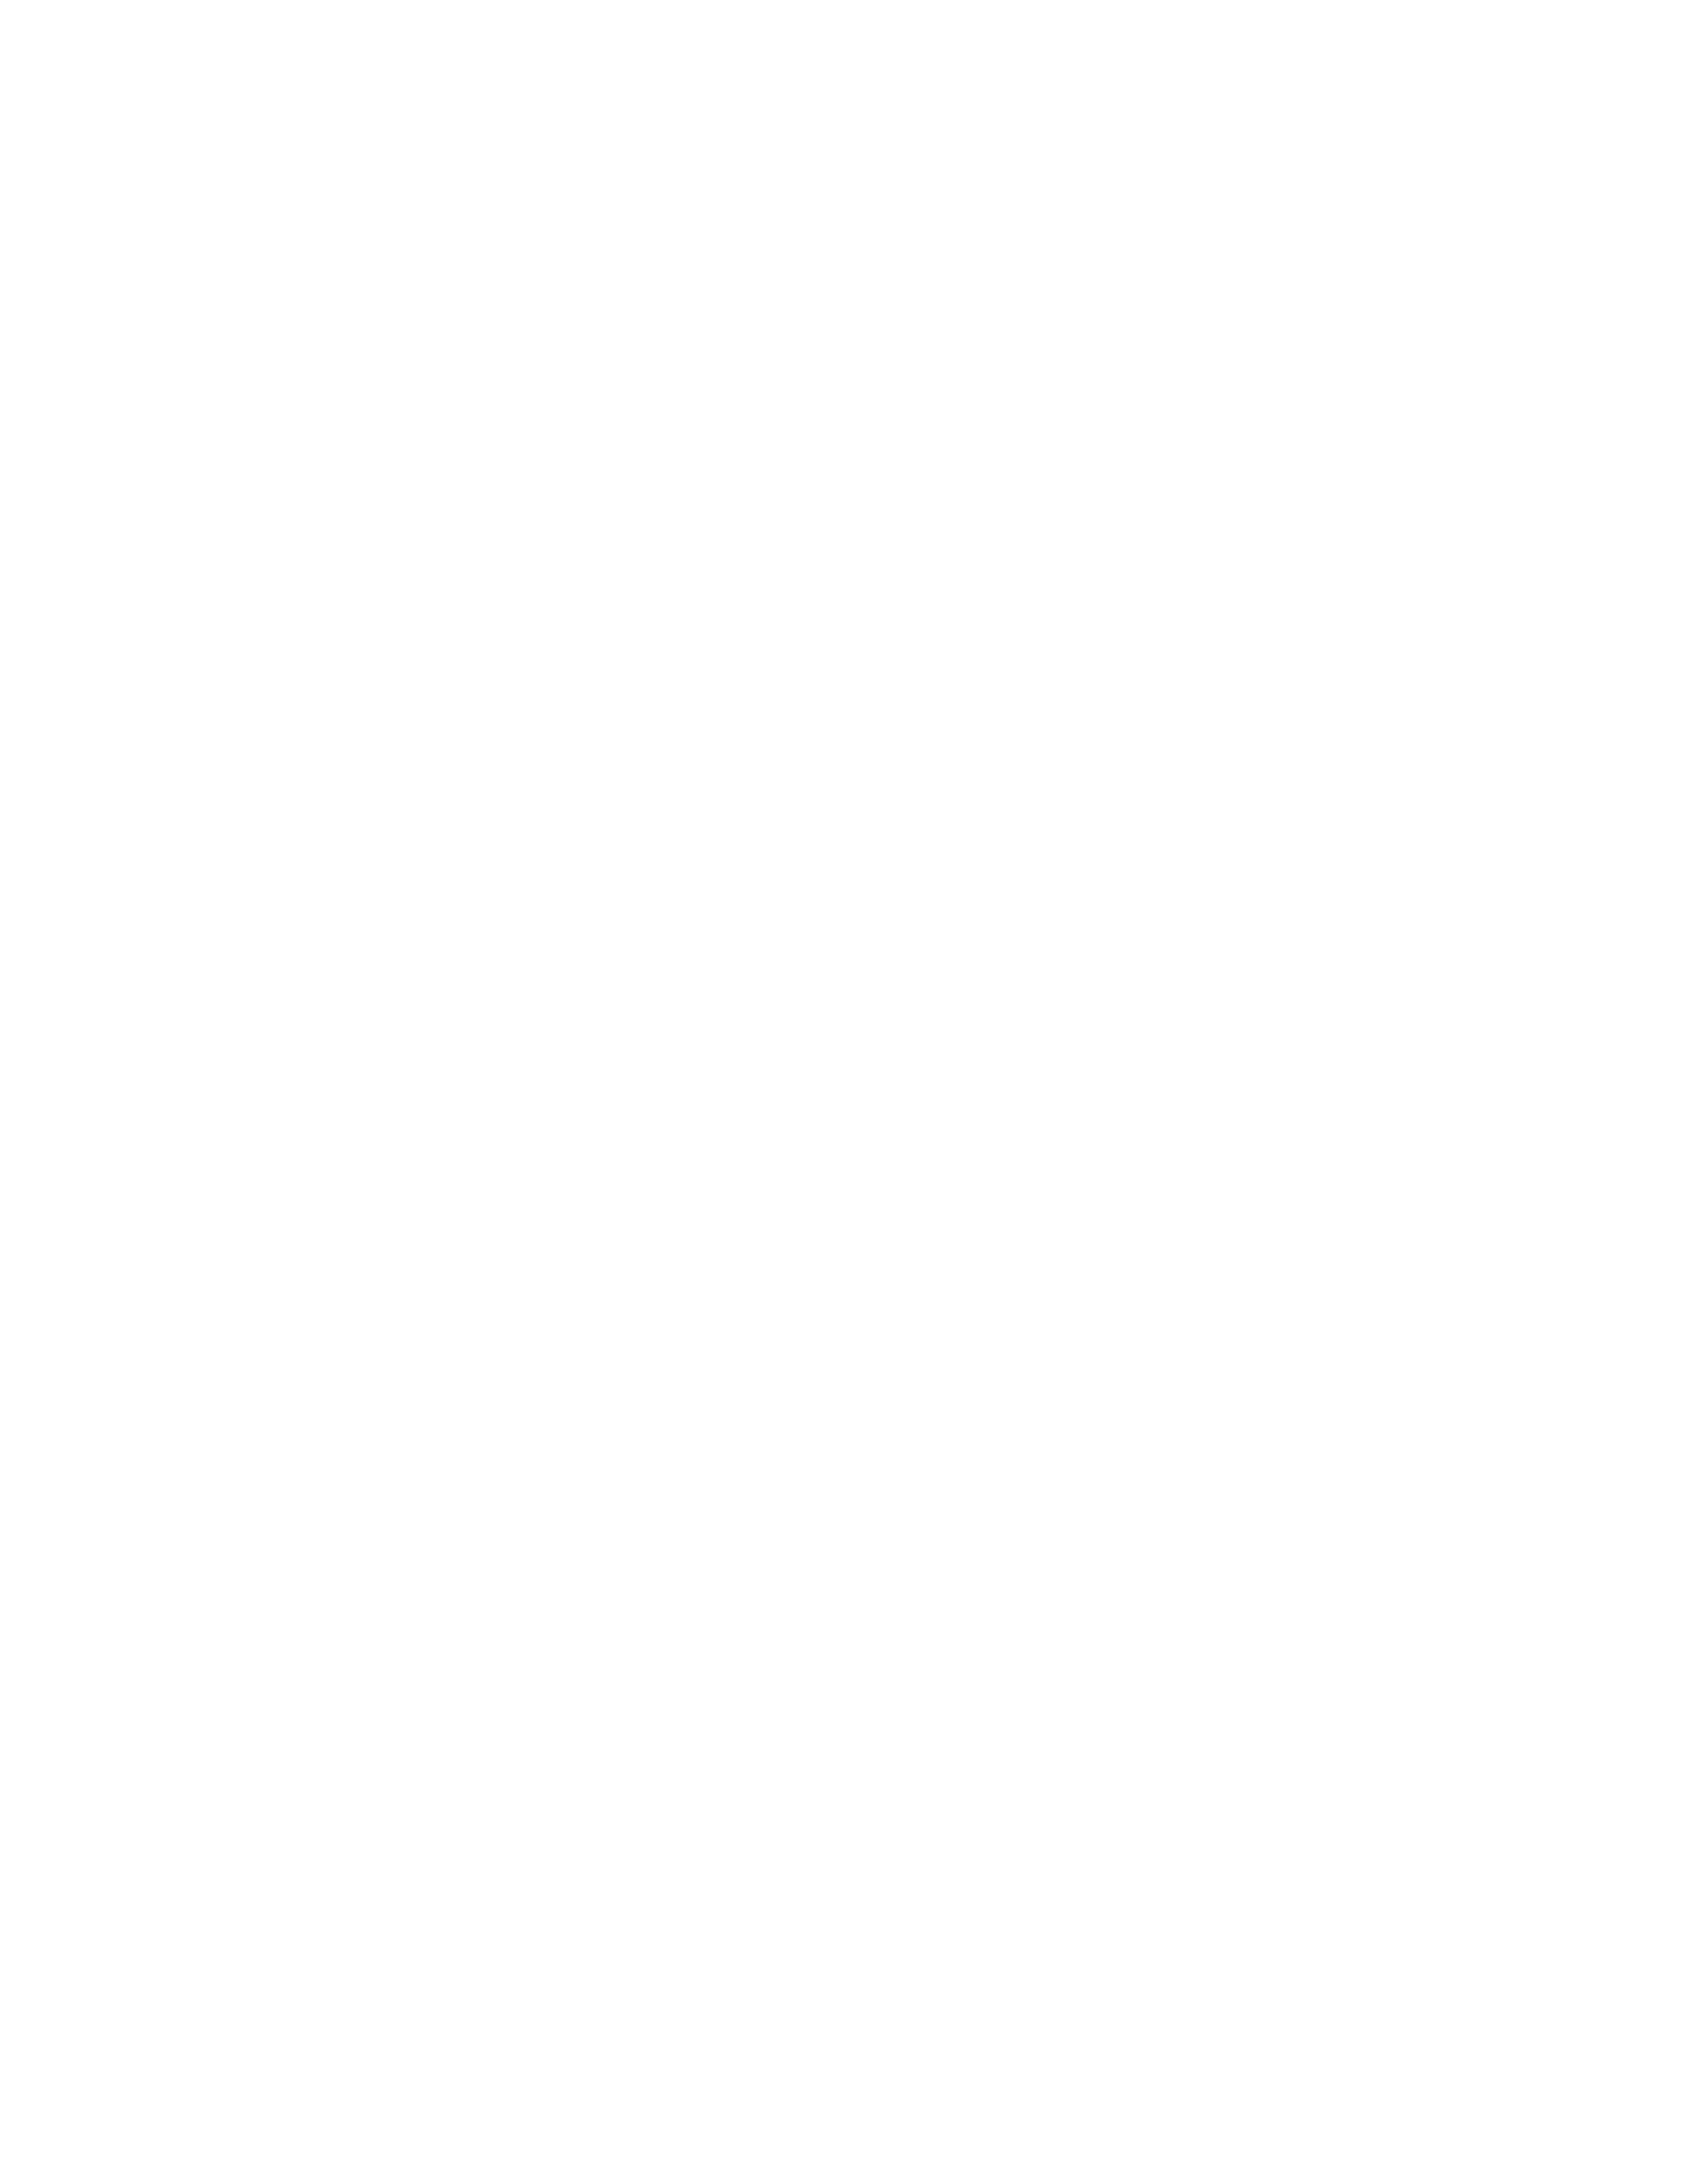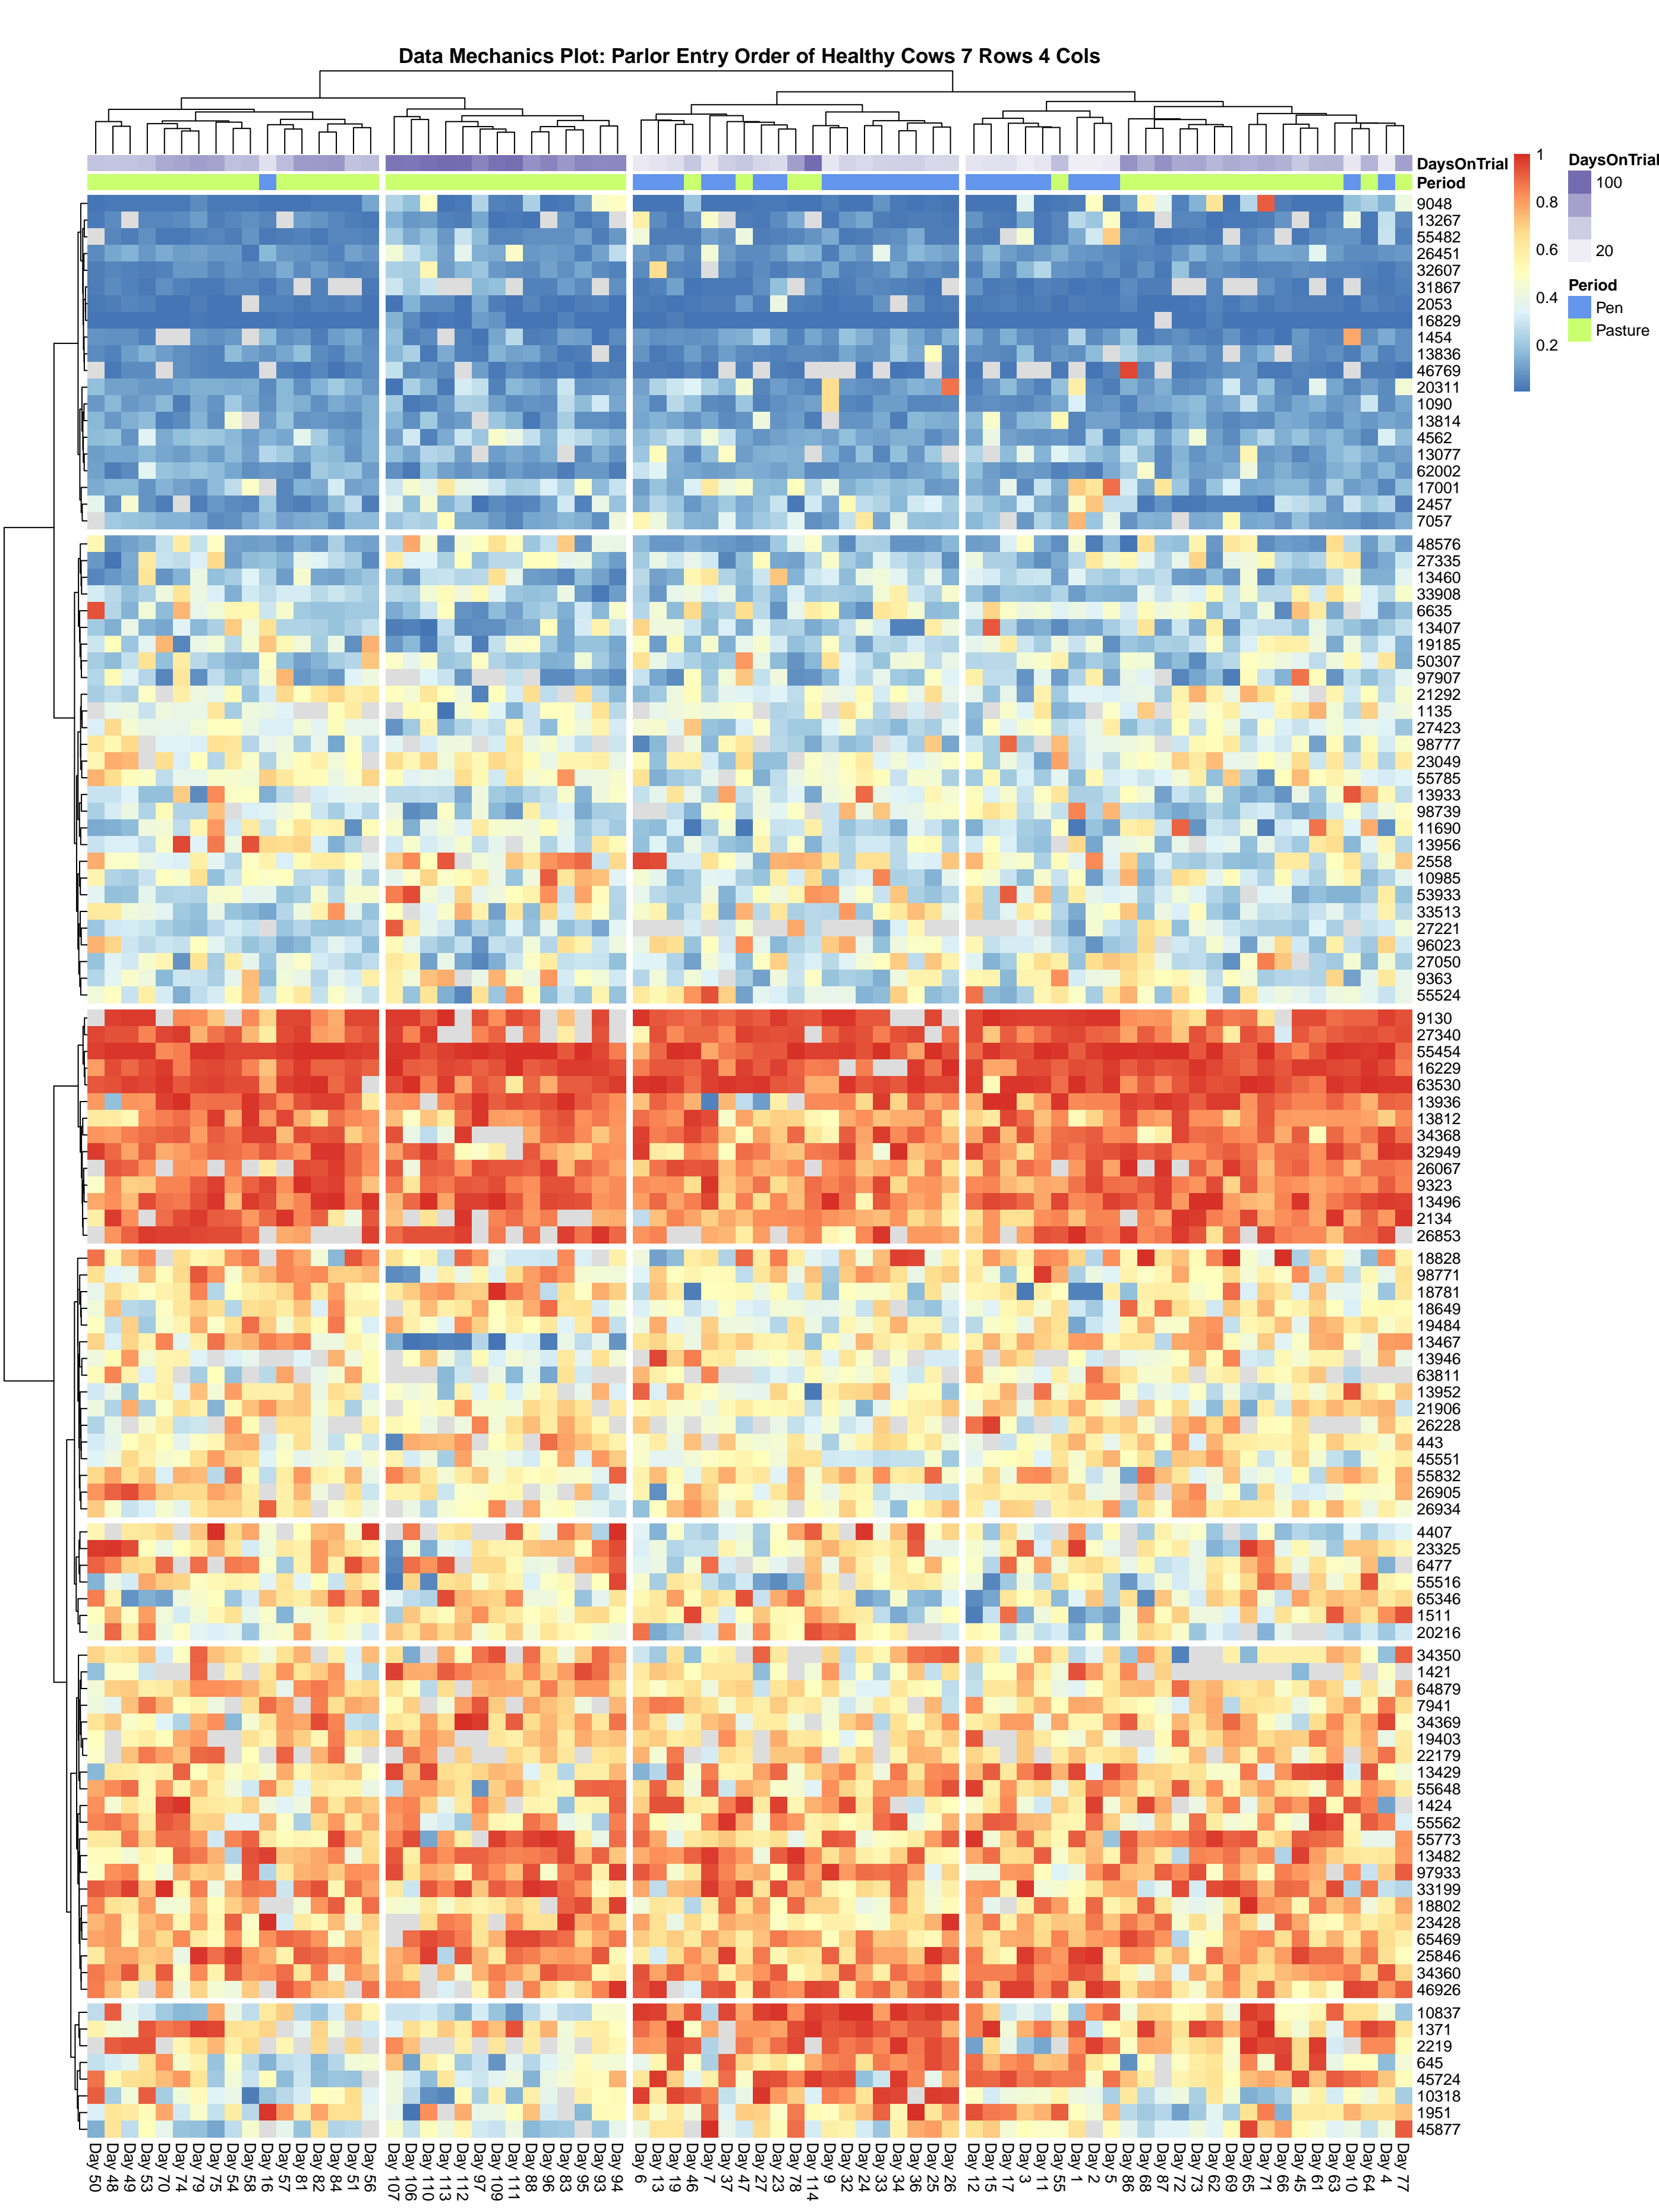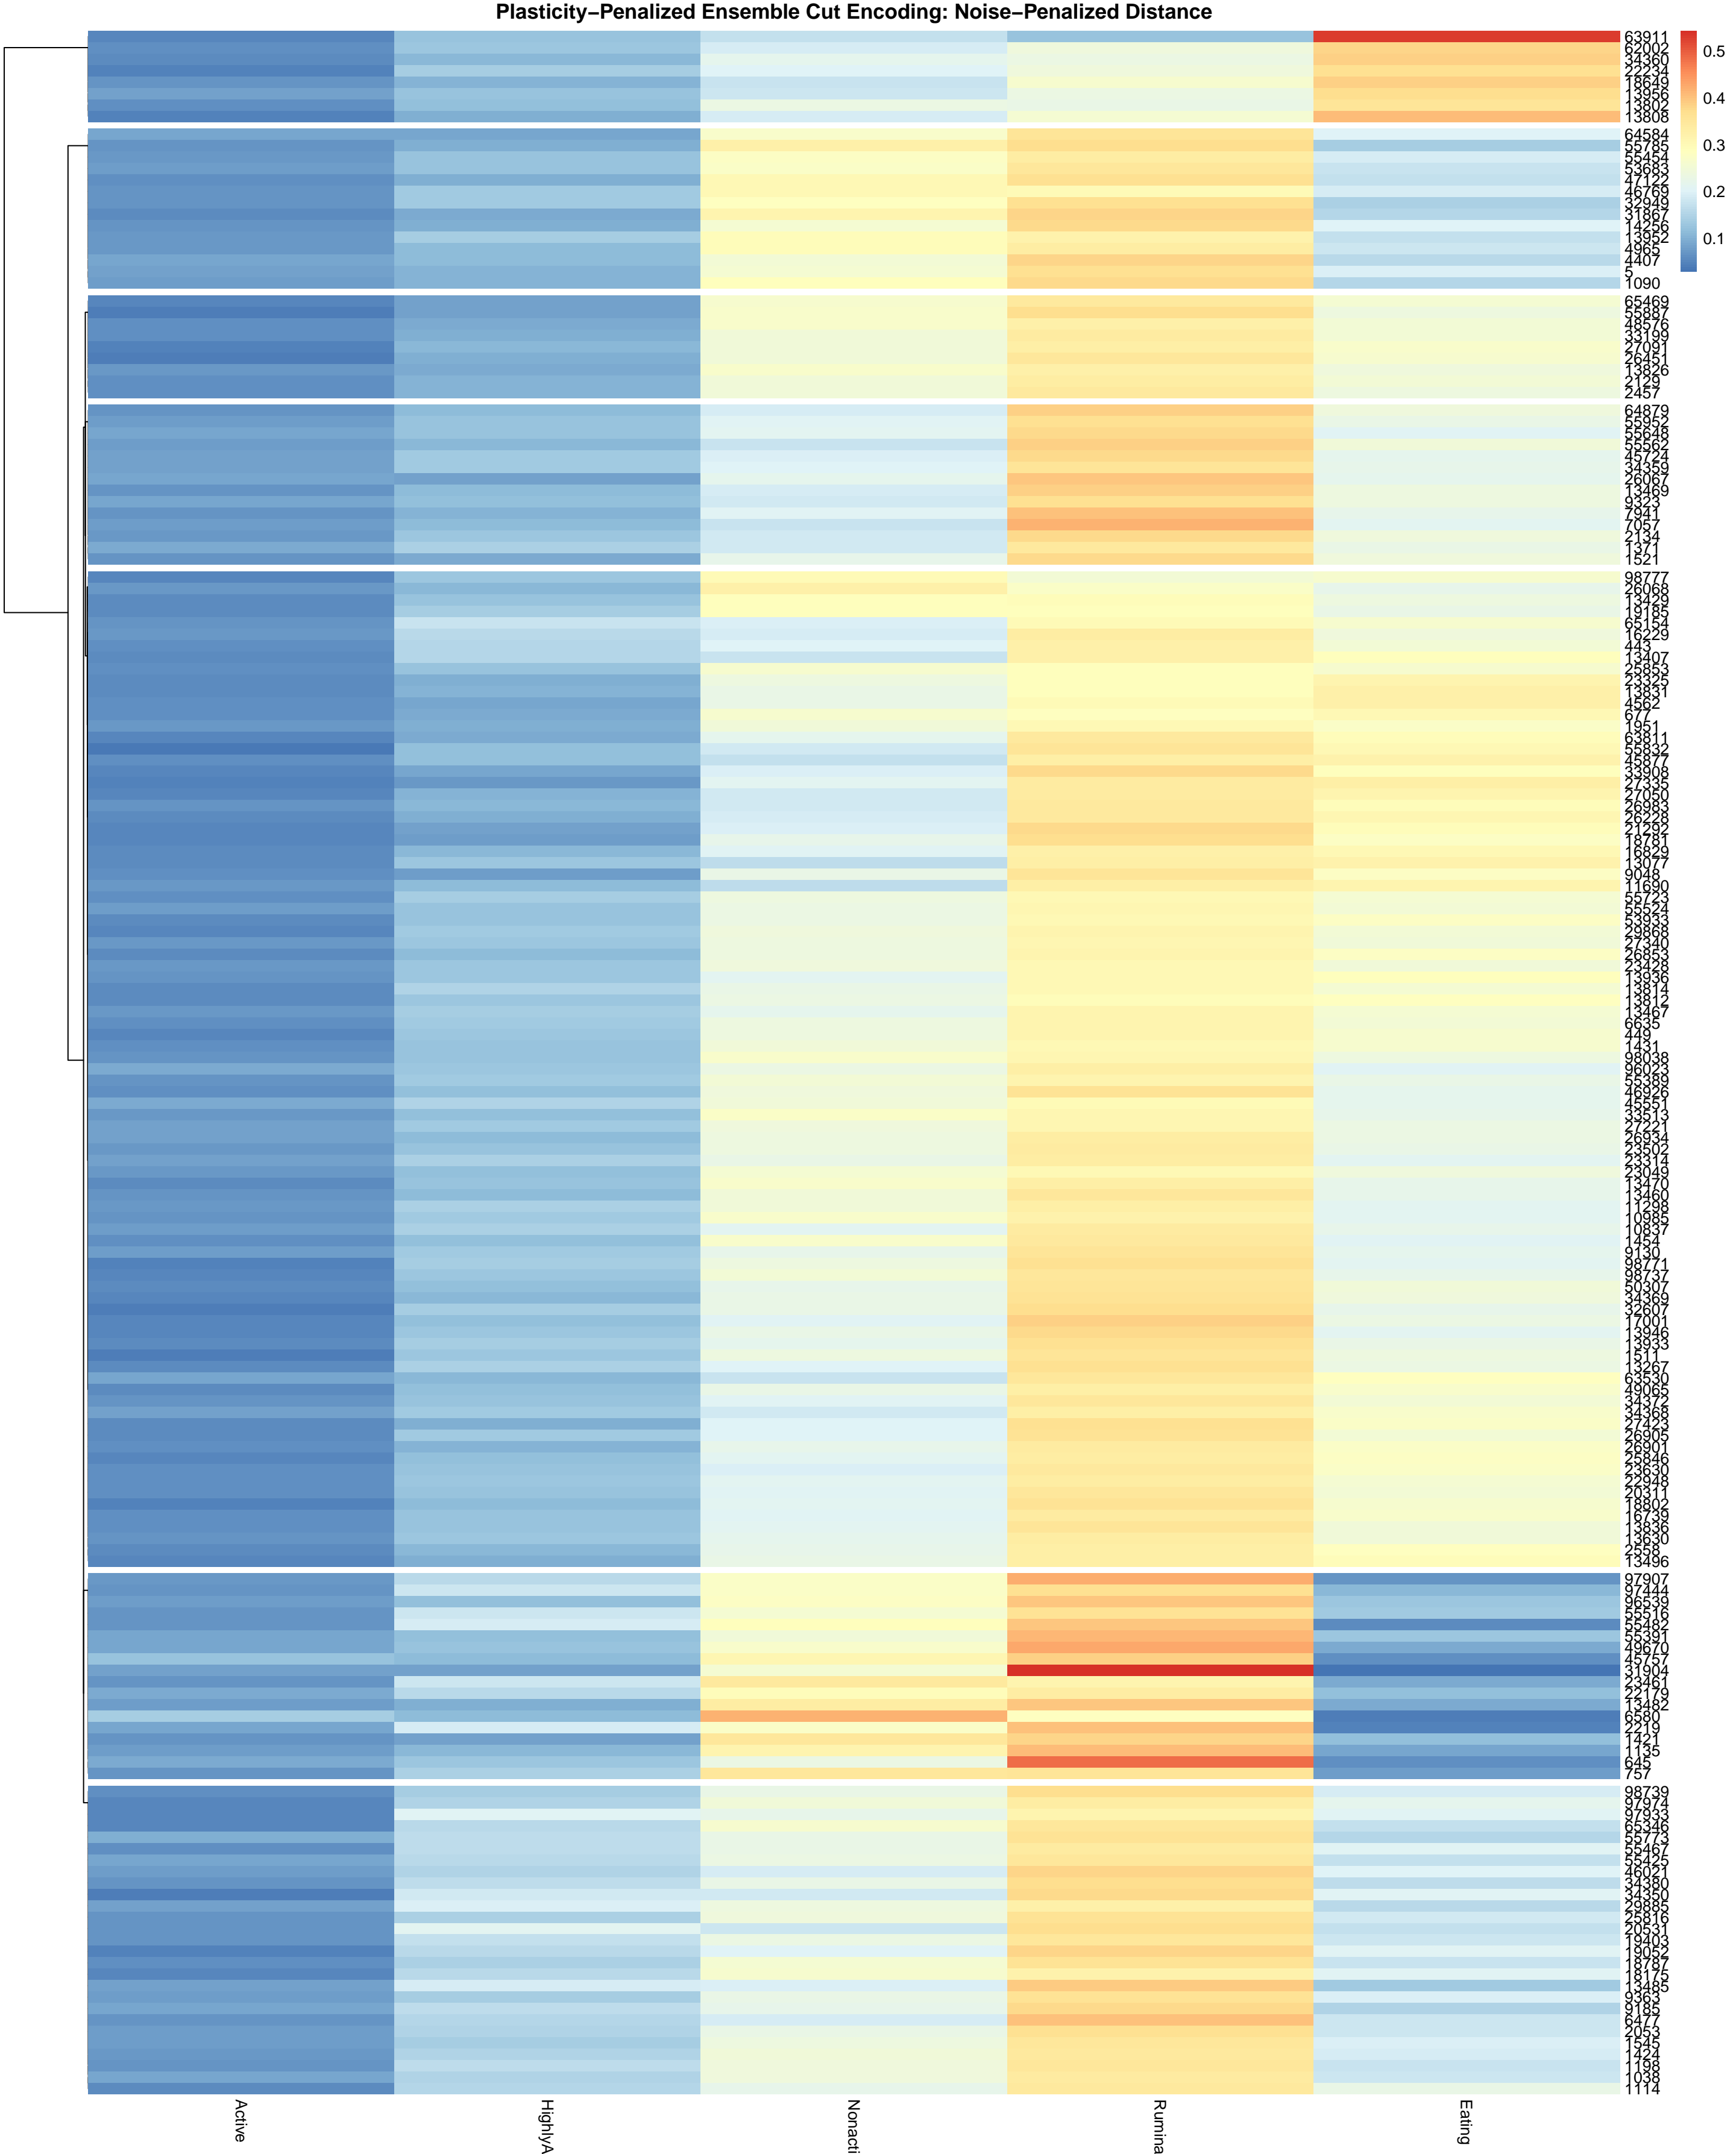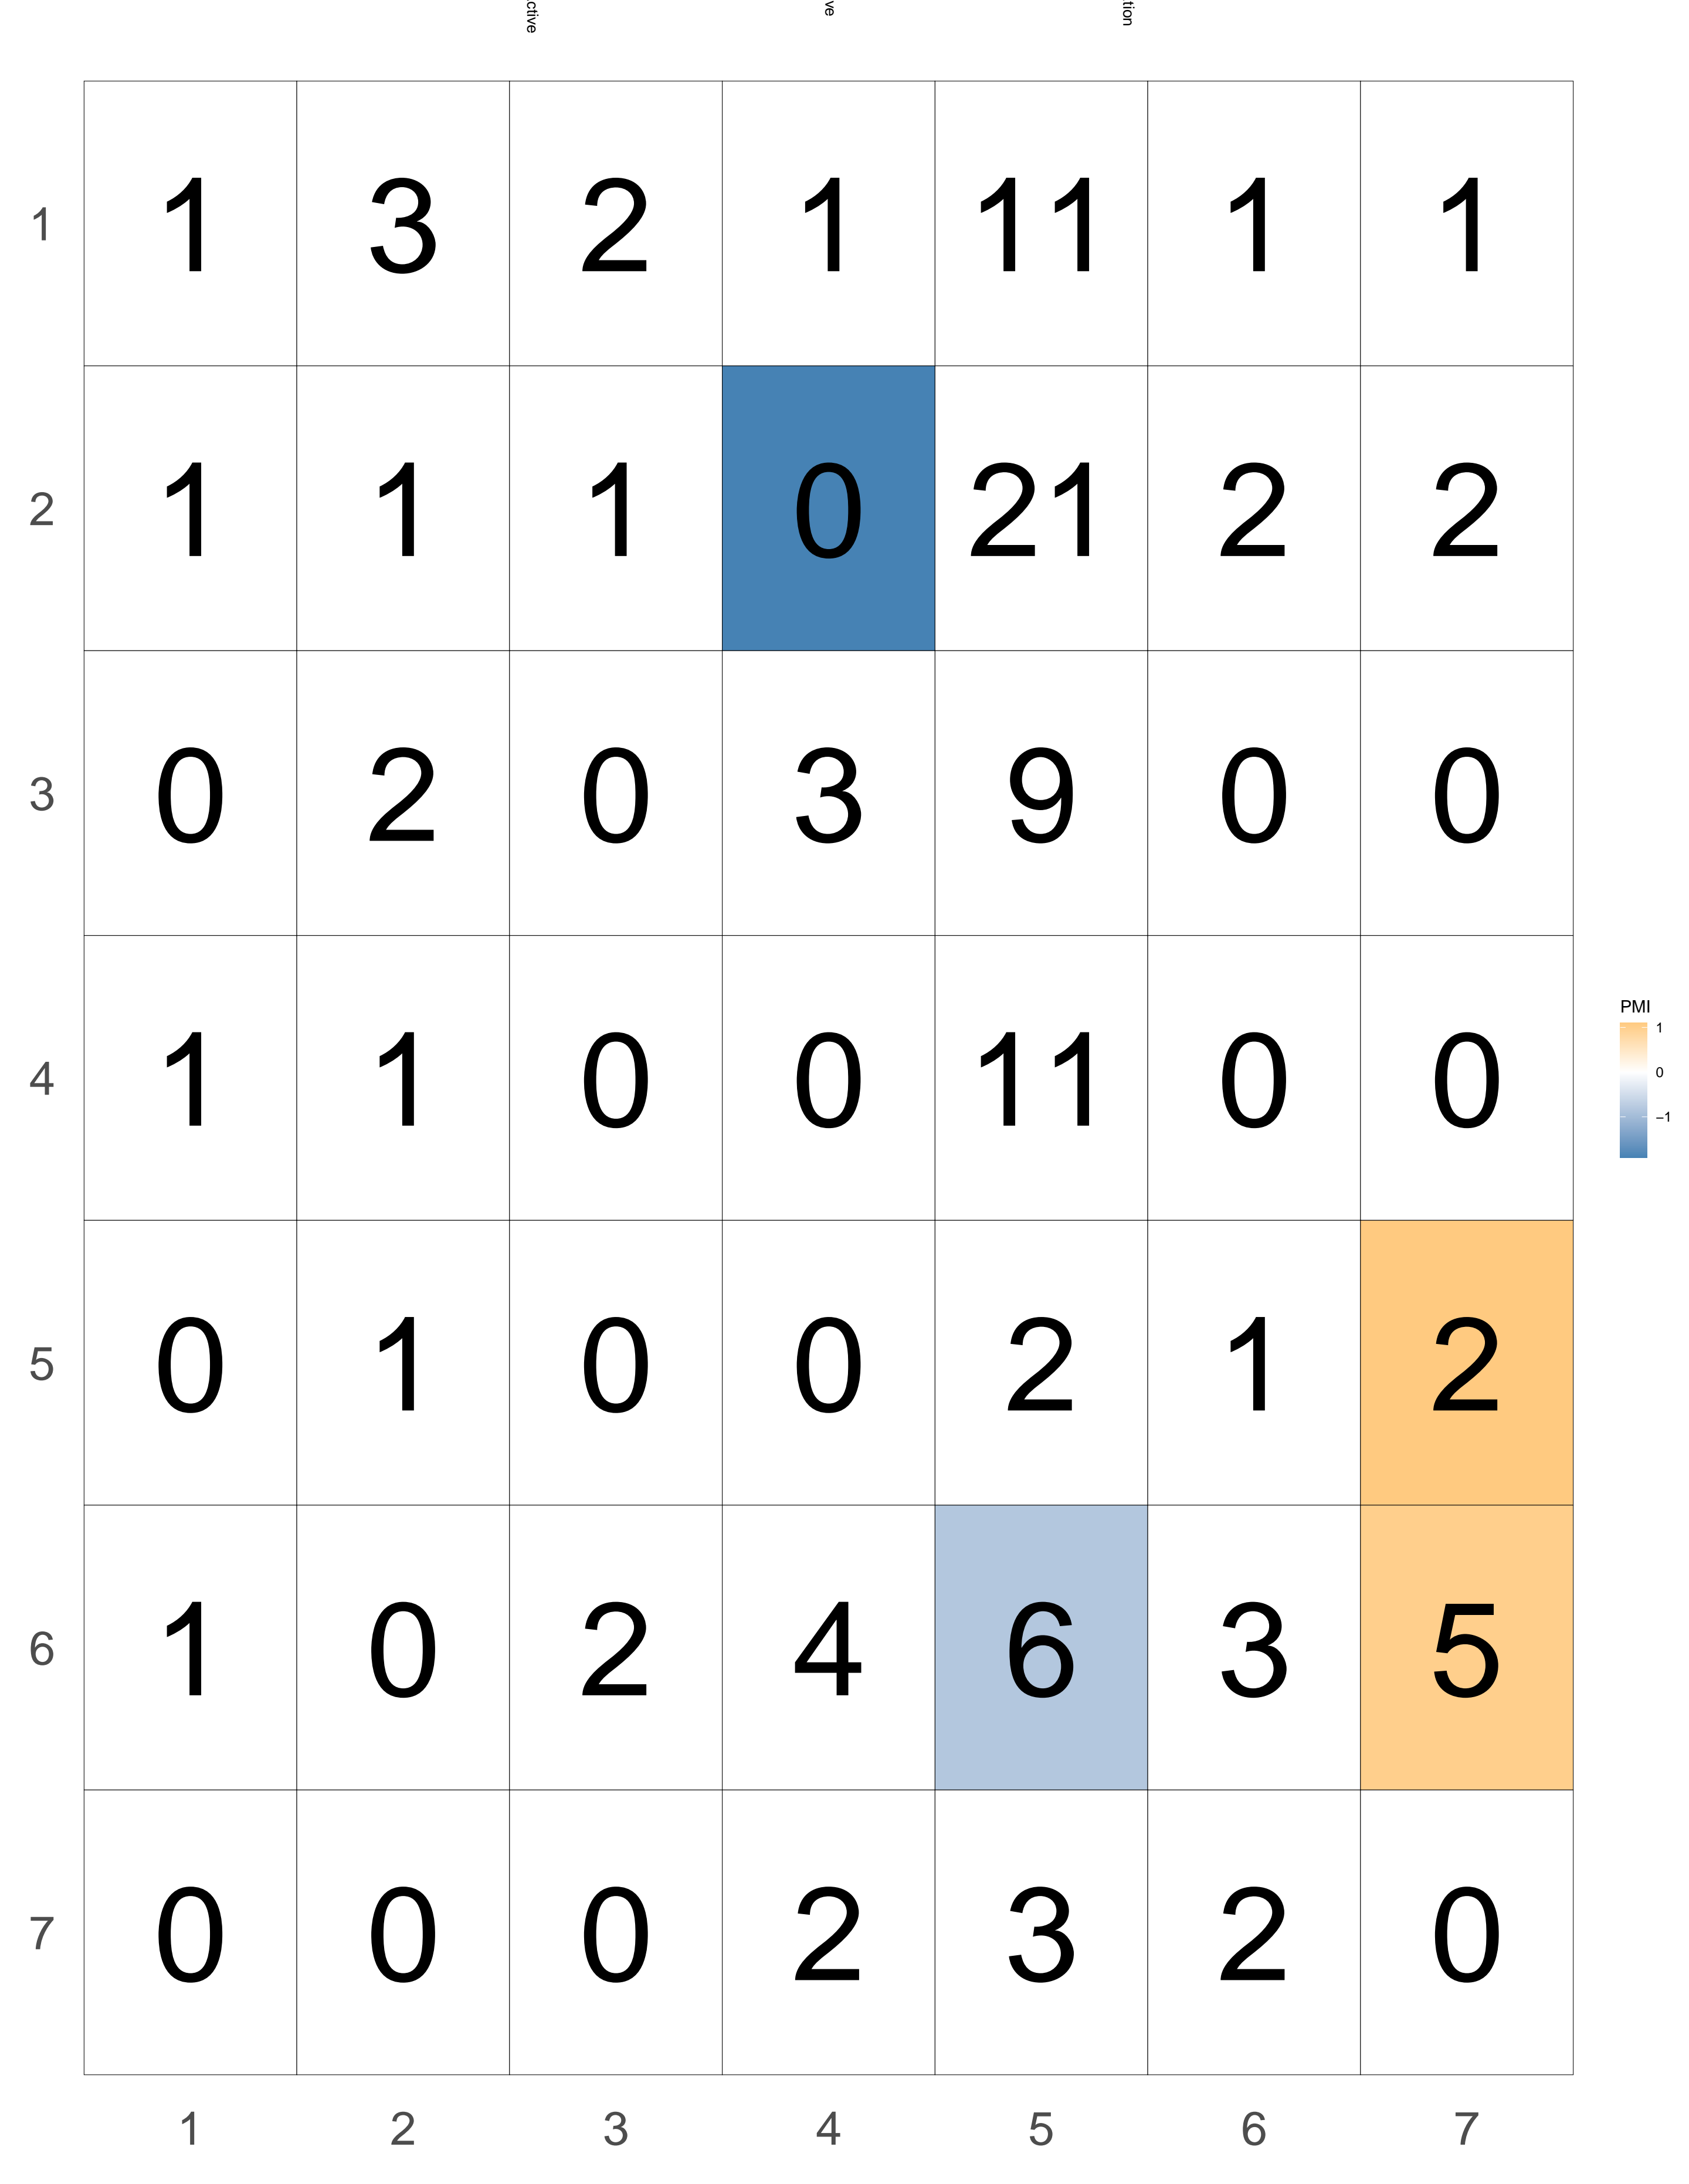

Supplement: s1 [file s1]

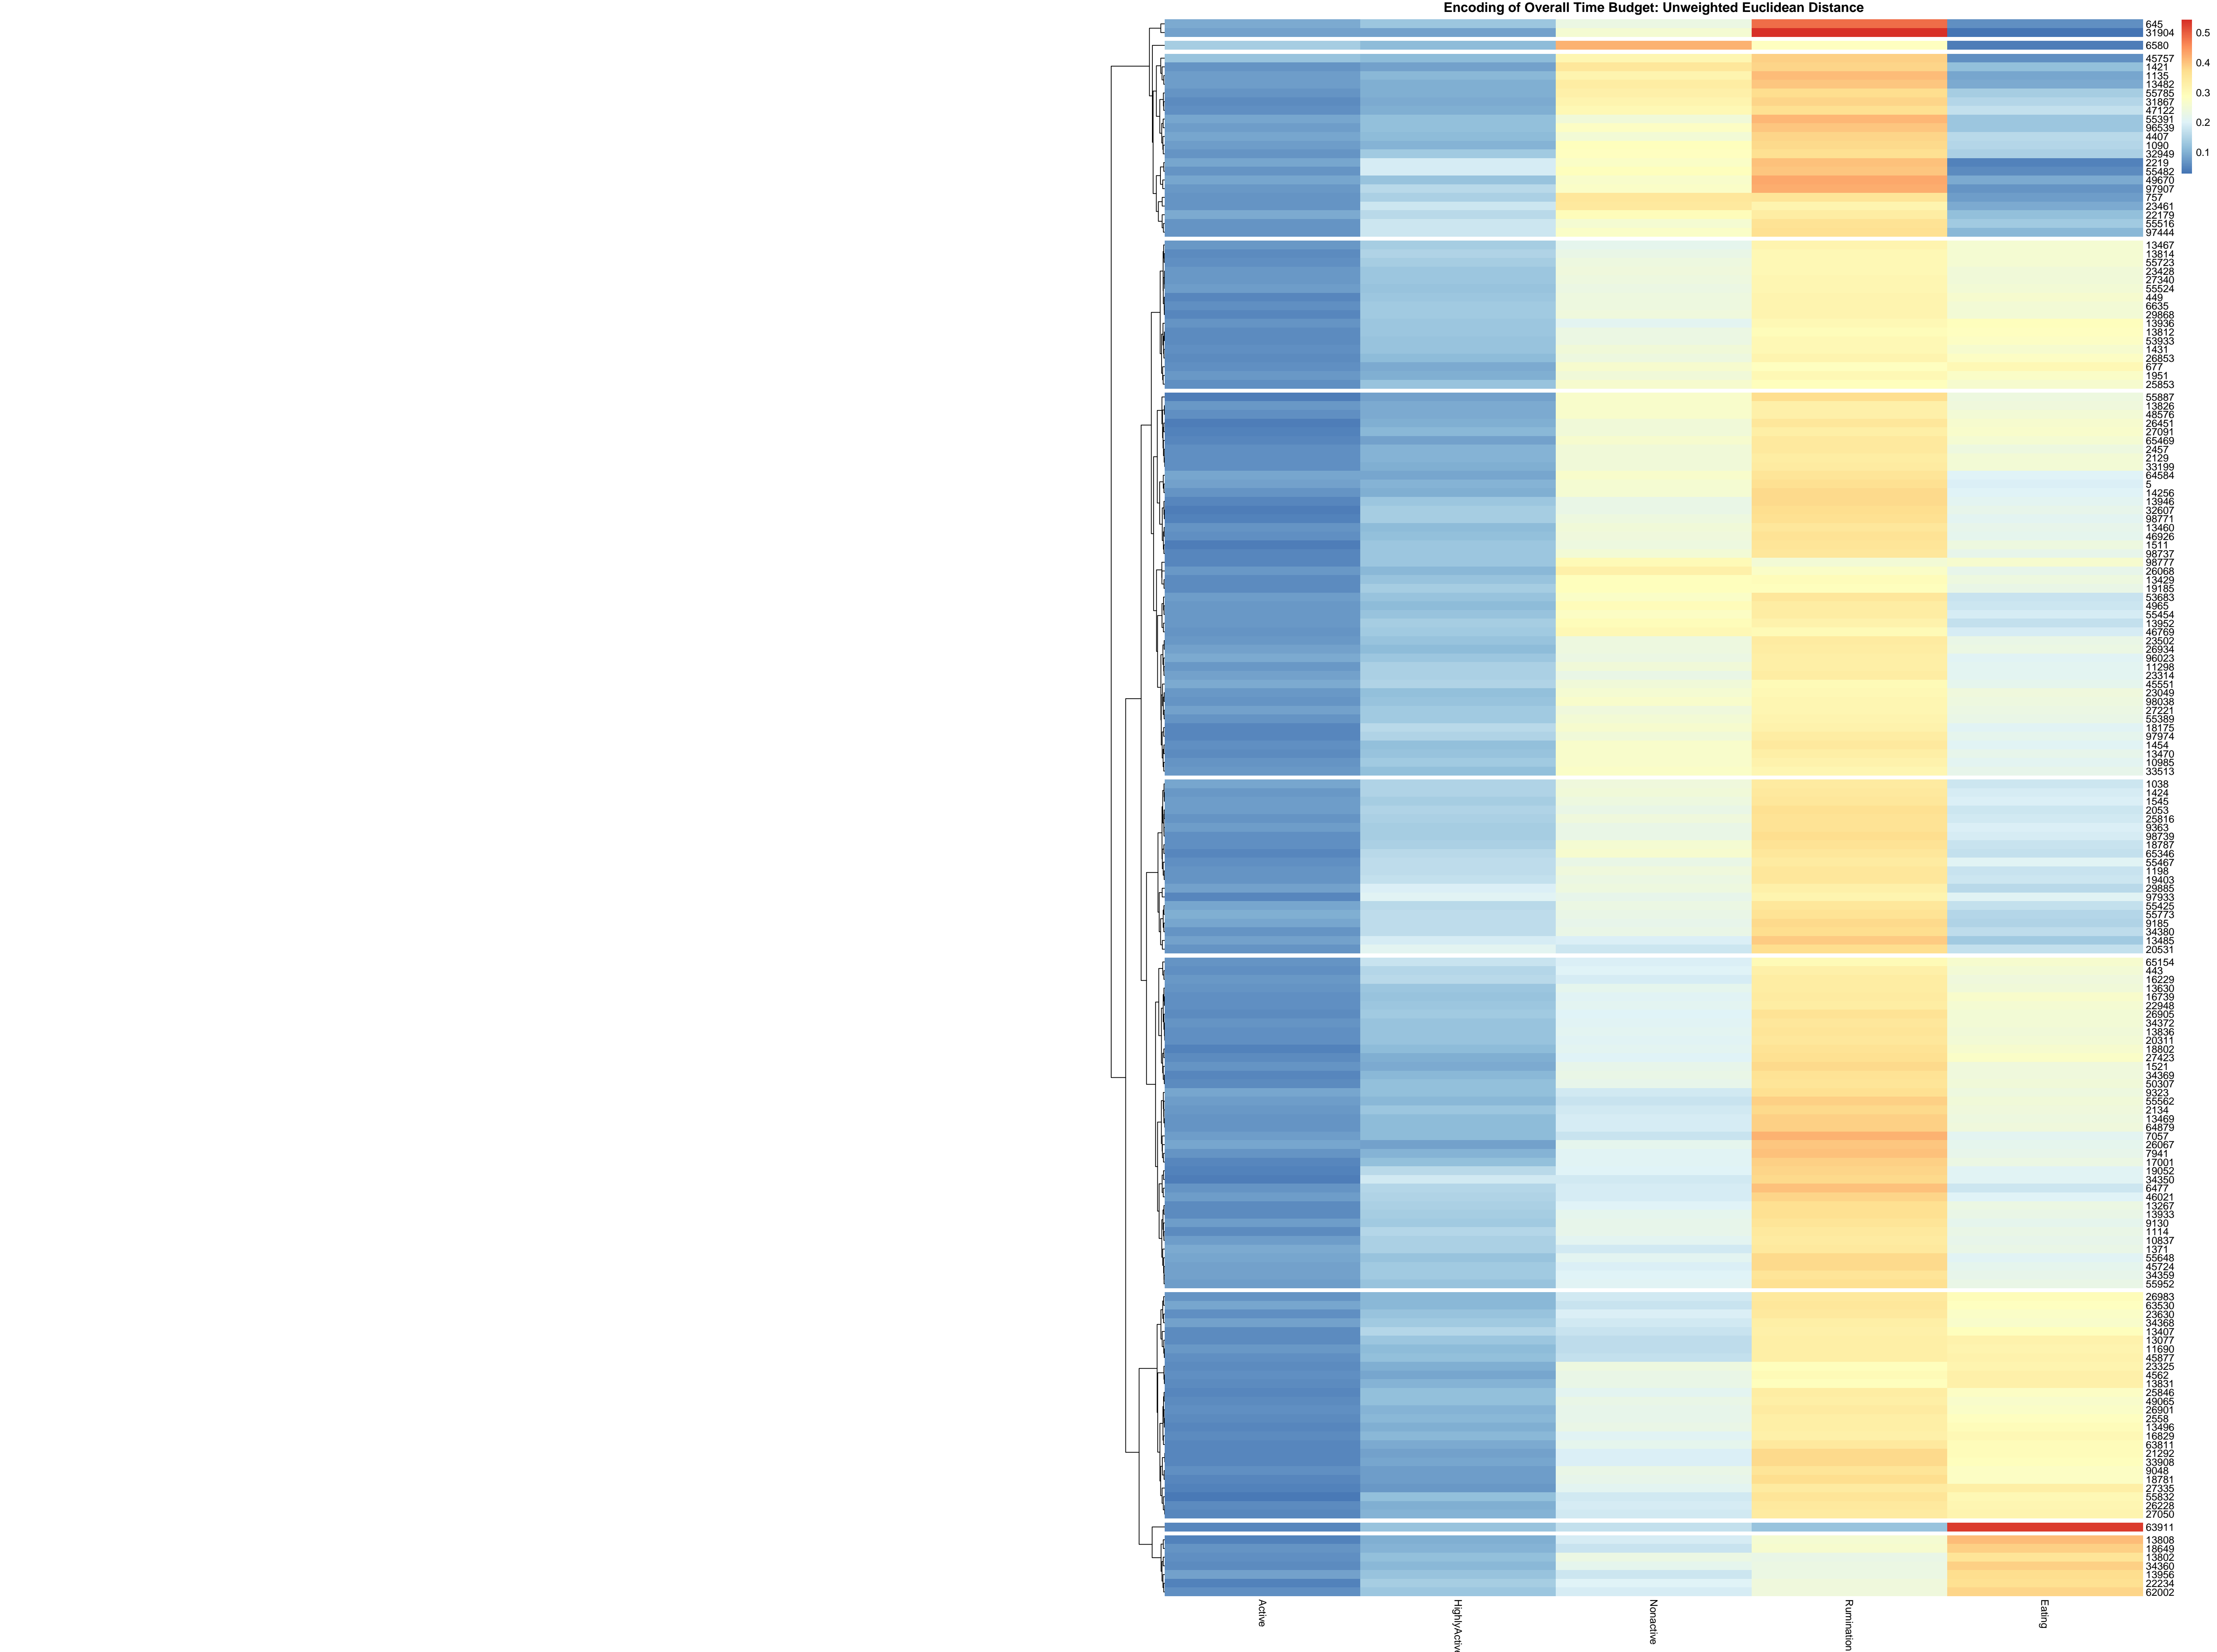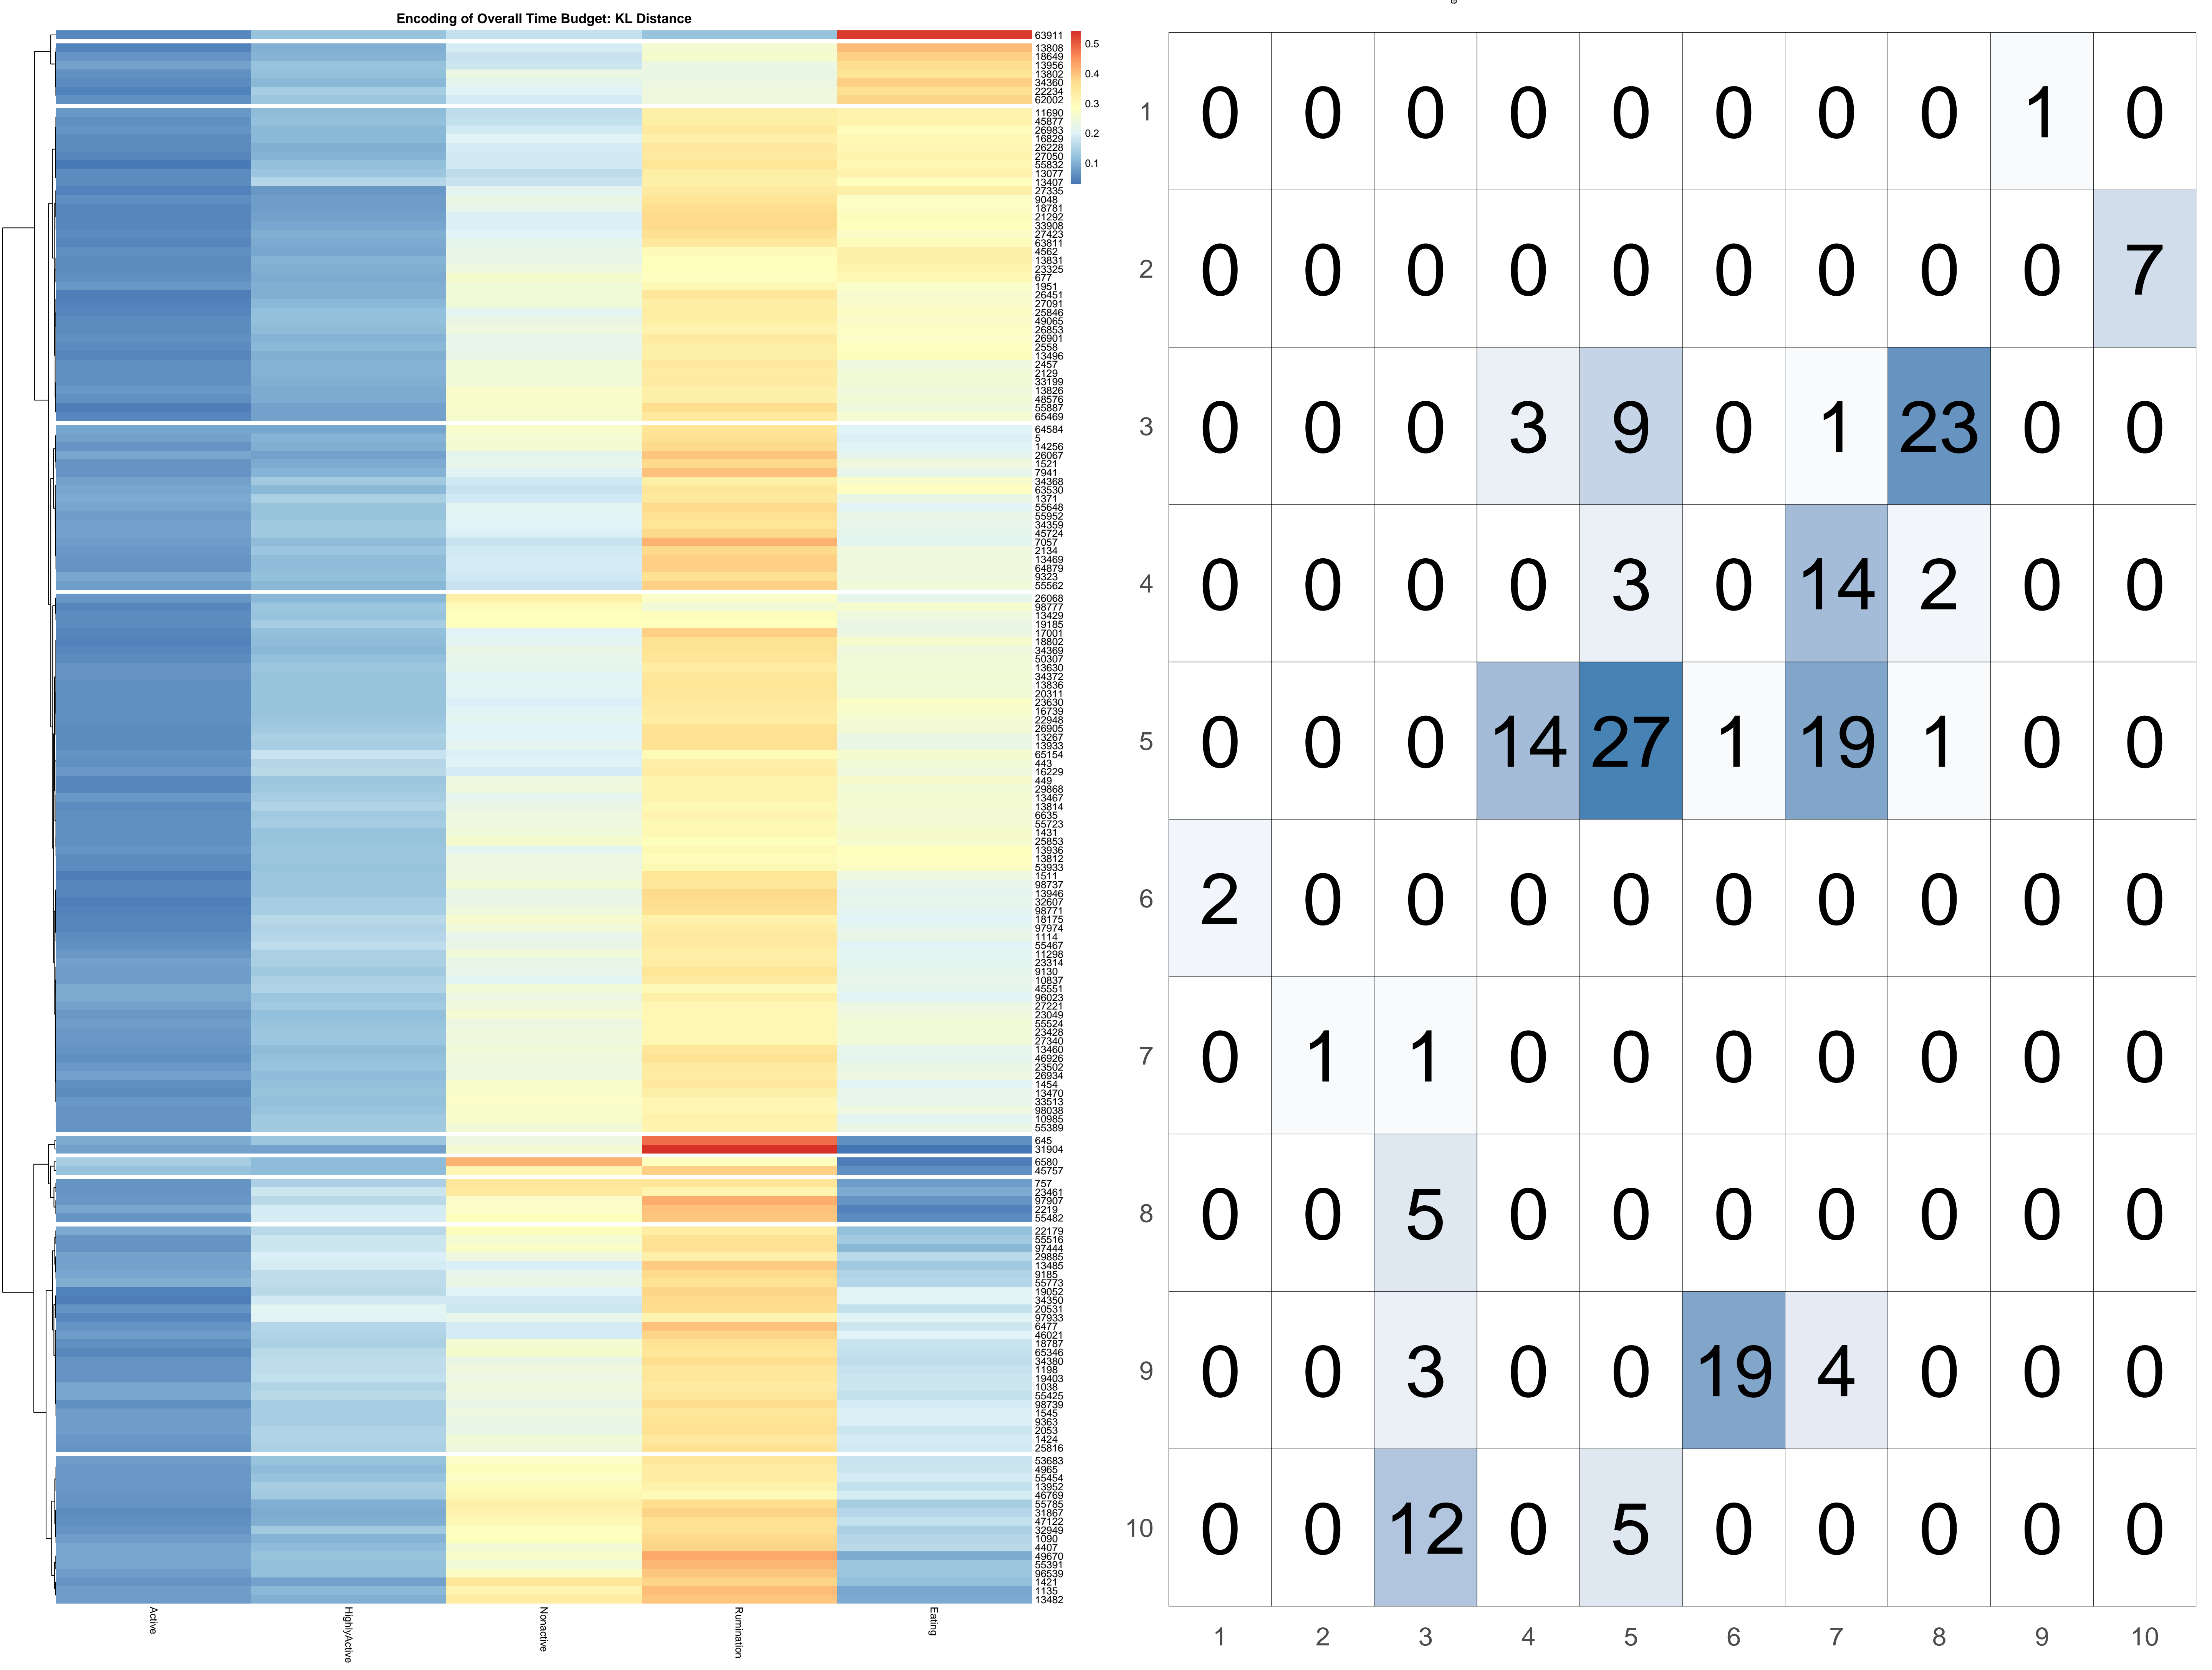

|    | 1 | 2 | 3  | 4  | 5  | 6  | 7  | 8  | 9 | 10 |
|----|---|---|----|----|----|----|----|----|---|----|
| 1  | 0 | 0 | 0  | 0  | 0  | 0  | 0  | 0  | 1 | 0  |
| 2  | 0 | 0 | 0  | 0  | 0  | 0  | 0  | 0  | 0 | 7  |
| 3  | 0 | 0 | 0  | 3  | 9  | 0  | 1  | 23 | 0 | 0  |
| 4  | 0 | 0 | 0  | 0  | 3  | 0  | 14 | 2  | 0 | 0  |
| 5  | 0 | 0 | 0  | 14 | 27 | 1  | 19 | 1  | 0 | 0  |
| 6  | 2 | 0 | 0  | 0  | 0  | 0  | 0  | 0  | 0 | 0  |
| 7  | 0 | 1 | 1  | 0  | 0  | 0  | 0  | 0  | 0 | 0  |
| 8  | 0 | 0 | 5  | 0  | 0  | 0  | 0  | 0  | 0 | 0  |
| 9  | 0 | 0 | 3  | 0  | 0  | 19 | 4  | 0  | 0 | 0  |
| 10 | 0 | 0 | 12 | 0  | 5  | 0  | 0  | 0  | 0 | 0  |

Supplement: s1 [file s1]

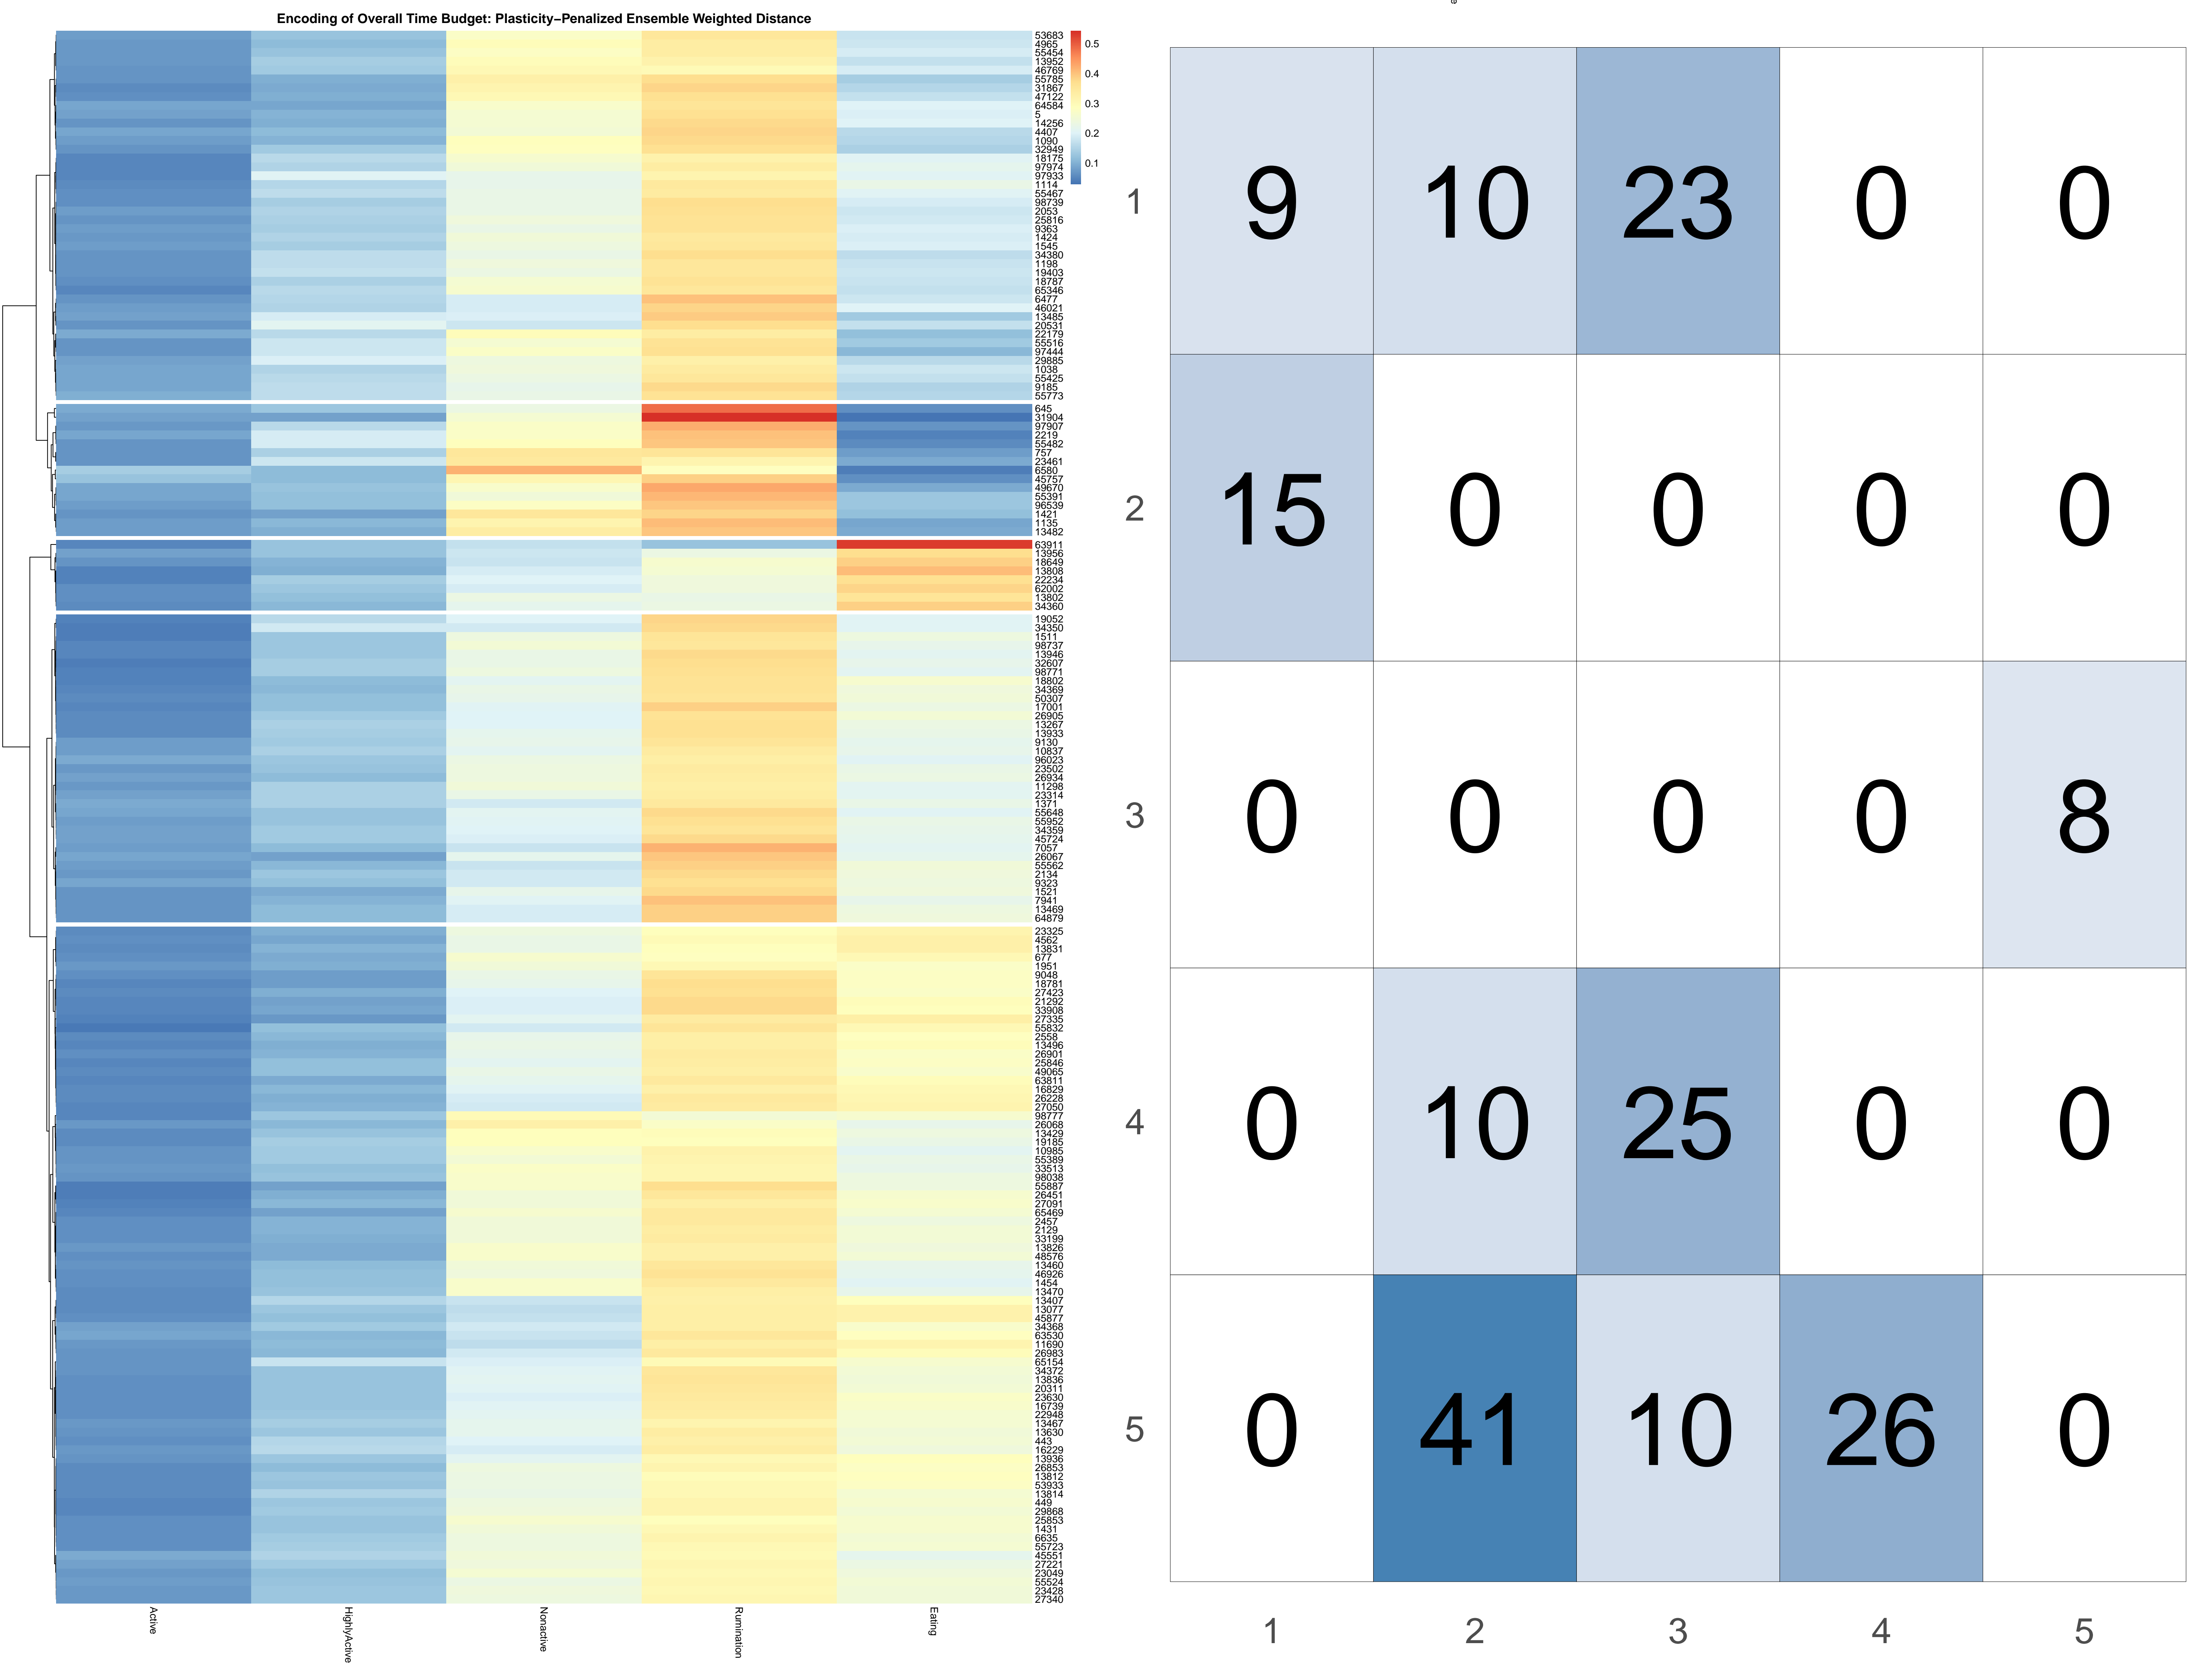

|   |    |    |    |    |   |
|---|----|----|----|----|---|
| 1 | 9  | 10 | 23 | 0  | 0 |
| 2 | 15 | 0  | 0  | 0  | 0 |
| 3 | 0  | 0  | 0  | 0  | 8 |
| 4 | 0  | 10 | 25 | 0  | 0 |
| 5 | 0  | 41 | 10 | 26 | 0 |
|   | 1  | 2  | 3  | 4  | 5 |

Supplement: s1 [file s1]

# Result of Bifucation Simulation: N 177

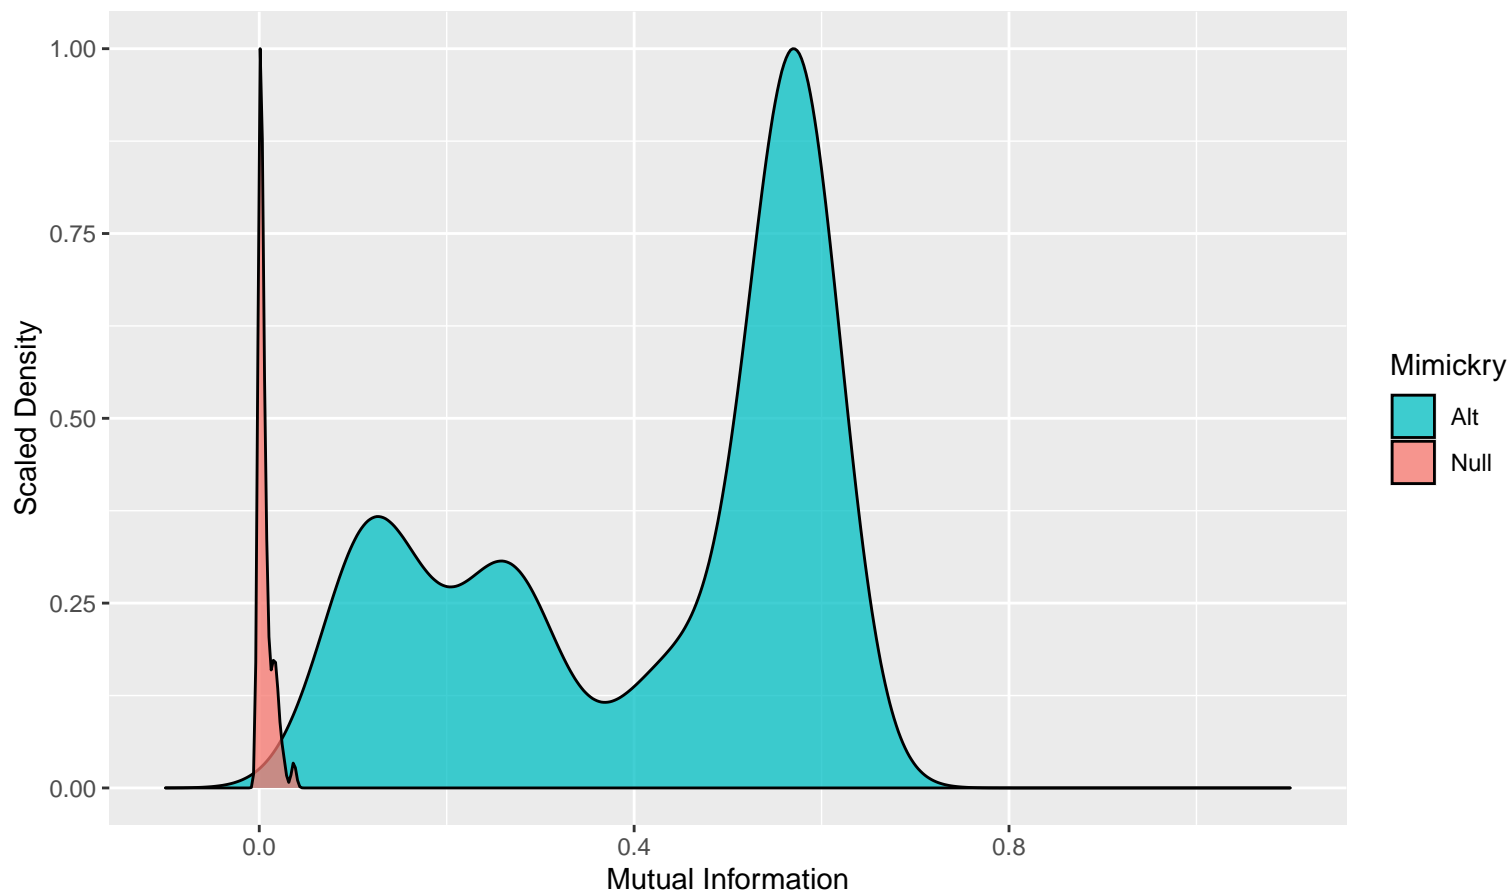

Supplement: s1 [file s1]
